# Supplementary material for: Integrated metabolomics and transcriptome analysis on flavonoid biosynthesis in flowers of safflower (Carthamus tinctorius L.) during colour-transition
Source: PeerJ. 2022 Jun 22;10:e13591. doi: 10.7717/peerj.13591 (PMC9233481; doi:10.7717/peerj.13591)
Supplement: Supplemental Information 1 [file peerj-10-13591-s001.xlsx]

## Sheet: Sheet1
Index	Q1 (Da)	Q3 (Da) MS only	Rt (min)	Molecular Weight (Da)	Ionization model	KEGG ID	Compounds	Class	mix01	mix02	mix03	M-early1	M-early2	M-early3	M-late1	M-late2	M-late3
pma0214	479	317.3	3.91	478	[M+H]+	-	methylQuercetin O-hexoside	Flavonol	6930000	5850000	5270000	9230000	9460000	14500000	25500000	22900000	21700000
pma0249	479.1	302.8	3.52	478.1	[M+H]+	-	Selgin 5-O-hexoside	Flavone	5790000	5520000	5520000	8580000	8690000	13200000	15800000	15700000	14300000
pma0253	477.1	315.5	5.27	476.1	[M+H]+	-	O-methylChrysoeriol 5-O-hexoside	Flavone	414000	432000	440000	437000	450000	510000	191000	331000	283000
pma0359	535.1	287.8	4.69	534.1	[M+H]+	-	Tricin 5-O-acetylglucoside	Flavone	80700	82300	78400	52100	55800	64200	129000	127000	87900
pma0724	435.1	339.7	3.79	434.1	[M+H]+	-	Naringenin C-hexoside	Flavone C-glycosides	46900	19200	44000	9	9	9	46100	69100	55600
pma0760	565	317.8	4.33	564	[M+H]+	-	Selgin O-malonylhexoside	Flavone	576000	551000	439000	1020000	1090000	1670000	1880000	1710000	2070000
pma0787	551.1	347.4	4.63	550.1	[M+H]+	-	Quercetin-3-(6''-malonyl)-Glucoside	Flavonol	80600	86500	54100	87600	94900	99700	77900	59700	69400
pma0791	521	317.6	4.5	520	[M+H]+	-	Naringenin O-malonylhexoside	Flavanone	5530000	5790000	5230000	4300000	4520000	5350000	9720000	9170000	9570000
pma0795	551	347.4	4.56	550	[M+H]+	-	Tricetin O-malonylhexoside	Flavone	1060000	870000	847000	1790000	1940000	2330000	1500000	1460000	1540000
pma0825	503	255.6	5.24	502	[M+H]+	-	Chrysin O-malonylhexoside	Flavone	54400	61600	53800	84400	101000	122000	59200	62500	58200
pma1108	433.1	271.7	3.78	432.1	[M+H]+	-	Apigenin C-glucoside	Flavone C-glycosides	1110000	1030000	1100000	467000	512000	655000	1350000	1200000	1120000
pma1116	301.1	259.1	4.13	300.1	[M+H]+	C10098	Kaempferide	Flavonol	83600	103000	172000	64300	205000	217000	124000	140000	82300
pma1590	463.1	301.4	2.89	463.123	Protonated	-	Peonidin O-hexoside	Anthocyanins	106000	95600	110000	9	9	9	65800	42700	38100
pma2088	627.1	465.2	4.83	626.1	[M+H]+	-	"Quercetin-3,4'-O-di-beta-glucopyranoside"	Flavonol	15100000	15400000	15200000	1360000	1260000	1430000	3900000	3710000	3270000
pma3443	535.3	487.2	5.78	534.3	[M+H]+	-	Tricin 7-O-acetylglucoside	Flavone	24400	17100	21200	9	9	9	9	11600	9
pma6254	757.3	757.2	3.68	756.3	[M+H]+	-	C-hexosyl-apigenin O-caffeoylhexoside	Flavone C-glycosides	80800	120000	63200	16400	12400	20500	26700	45300	42300
pma6371	611.2	575.7	3.08	610.2	[M+H]+	-	"di-C,C-hexosyl-luteolin"	Flavone C-glycosides	69900	90700	80400	19400	33000	40300	65900	72000	44100
pma6389	345.2	177.5	6.33	344.2	[M+H]+	C04444	Ayanin	Flavonol	21200	22400	19700	48100	42400	44200	45400	51400	50400
pma6496	449.1	300	3.45	448.1	[M+H]+	-	Luteolin 6-C-glucoside	Flavone C-glycosides	184000	198000	179000	171000	163000	196000	364000	361000	271000
pma6499	509.3	347.9	3.41	508.3	[M+H]+	-	Limocitrin O-hexoside	Flavone	584000	578000	538000	746000	771000	1190000	1920000	1620000	1640000
pma6515	755.2	332.1	4.73	754.2	[M+H]+	-	C-hexosyl-chrysin O-feruloylhexoside	Flavone C-glycosides	225000	234000	273000	47700	61600	67500	32900	33200	34500
pma6516	757.3	450.1	3.55	756.3	[M+H]+	-	C-hexosyl-apigenin O-hexosyl-O-hexoside	Flavone C-glycosides	5200000	5470000	5240000	4290000	4550000	5490000	3270000	2950000	2970000
pma6558	313.1	298.3	7.22	314.1	[M-H]-	-	Velutin	Flavone	8880	11800	7670	6640	6740	6880	18000	9130	9870
pma6586	567.3	406	4.04	566.3	[M+H]+	-	Tricin O-glycerylhexoside	Flavone	152000	178000	188000	155000	224000	249000	241000	191000	183000
pma6638	477.2	328	5.3	476.2	[M+H]+	-	O-methylChrysoeriol 7-O-hexoside	Flavone	1010000	714000	738000	724000	757000	961000	520000	397000	326000
pma6639	479.2	318	4.17	478.2	[M+H]+	-	Isorhamnetin O-hexoside	Flavonol	1830000	1790000	1840000	1610000	1840000	2290000	5750000	5620000	5110000
pma6647	625.2	463.6	3.37	624.2	[M+H]+	-	C-hexosyl-chrysoeriol O-hexoside	Flavone C-glycosides	250000	183000	159000	151000	103000	166000	246000	202000	245000
pmb0322	653.3	345.9	4.76	652.3	[M+H]+	-	"3’,4’,5’-Tricetin O-rutinoside"	Flavone	22200	23500	23300	25200	20800	18300	26300	39100	21200
pmb0358	641.1	479.5	4.39	640.1	[M+H]+	-	Selgin O-hexosyl-O-hexoside	Flavone	86500	55000	89800	43400	38900	47900	59100	64600	77500
pmb0541	697.1	696.9	2.09	697.1	Protonated	-	Cyanidin 3-O-glucosyl-malonylglucoside	Anthocyanins	64000	81300	105000	14300	16300	14200	26400	33400	35400
pmb0542	535.1	287.4	2.99	535.1	Protonated	-	Cyanidin 3-O-malonylhexoside	Anthocyanins	489000	522000	583000	751000	729000	765000	536000	545000	594000
pmb0545	477.1	315.6	3.32	477.1	Protonated	-	Rosinidin O-hexoside	Anthocyanins	64600	76200	76300	107000	99100	136000	125000	138000	123000
pmb0550	449.1	287.3	2.59	449.1	Protonated	C08604	Cyanidin 3-O-glucoside (Kuromanin)	Anthocyanins	687000	775000	677000	1080000	1080000	1810000	613000	609000	572000
pmb0563	301.1	273.6	3.95	301.1	Protonated	C08726	Peonidin	Anthocyanins	111000	159000	97500	78500	200000	122000	84900	72200	96300
pmb0566	581.2	287.3	3.74	580.2	[M+H]+	-	Luteolin O-hexosyl-O-pentoside	Flavone	448000	465000	402000	310000	290000	277000	477000	502000	445000
pmb0569	509.2	347.6	4.17	508.2	[M+H]+	-	Syringetin 5-O-hexoside	Flavone	396000	386000	417000	540000	614000	719000	590000	700000	682000
pmb0574	757.1	581.5	4.31	756.1	[M+H]+	-	Luteolin O-hexoside O-feruloylpentoside	Flavone	720000	725000	829000	532000	589000	726000	604000	530000	527000
pmb0576	519	271.7	4.23	518	[M+H]+	-	Apigenin O-malonylhexoside	Flavone	171000	167000	168000	213000	237000	279000	228000	204000	225000
pmb0578	655	287.7	4.67	654	[M+H]+	-	Luteolin O-sinapoylhexoside	Flavone	172000	146000	141000	226000	200000	299000	338000	265000	318000
pmb0587	639.1	640	3.29	638.1	[M+H]+	-	Chrysoeriol O-glucuronic acid-O-hexoside	Flavone	43500	40900	50100	97500	92500	175000	107000	117000	97200
pmb0588	611.1	449.4	3.32	610.1	[M+H]+	-	"Luteolin 3',7-di-O-glucoside"	Flavone	567000	598000	607000	535000	599000	708000	603000	518000	522000
pmb0595	479.2	317.8	4.17	478.2	[M+H]+	-	Isorhamnetin 5-O-hexoside	Flavonol	2320000	2870000	2370000	4450000	4230000	4900000	7250000	7000000	6520000
pmb0600	609.4	301.7	4.08	608.4	[M+H]+	-	Chrysoeriol 7-O-rutinoside	Flavone	532000	533000	458000	83200	114000	111000	131000	126000	127000
pmb0602	509.3	283.6	4.17	508.3	[M+H]+	-	Syringetin 7-O-hexoside	Flavone	421000	323000	355000	538000	541000	805000	690000	695000	682000
pmb0603	625.1	331.7	4.17	624.1	[M+H]+	-	Chrysoeriol O-hexosyl-O-hexoside	Flavone	578000	615000	435000	894000	1020000	1220000	1030000	917000	976000
pmb0604	449.1	287.6	3.93	448.1	[M+H]+	C12249	Kaempferol 3-O-glucoside (Astragalin)	Flavonol	778000	786000	810000	504000	569000	891000	1220000	922000	918000
pmb0605	433.1	271.7	4.21	432.1	[M+H]+	C04608	Apigenin 7-O-glucoside (Cosmosiin)	Flavone	9340000	9410000	9820000	3060000	3250000	4210000	6870000	6160000	6620000
pmb0606	477.1	287	4.19	476.1	[M+H]+	-	Chrysoeriol O-glucuronic acid	Flavone	1240000	1120000	1070000	1450000	1430000	2100000	2360000	2090000	2080000
pmb0607	463.2	287.7	4.3	462.2	[M+H]+	-	Chrysoeriol 7-O-hexoside	Flavone	17700000	17500000	18300000	9180000	9830000	12000000	9900000	8870000	8450000
pmb0608	549.1	301.7	4.55	548.1	[M+H]+	-	Chrysoeriol O-malonylhexoside	Flavone	419000	350000	294000	673000	711000	854000	533000	508000	523000
pmb0615	789.1	789.1	2.58	788.1	[M+H]+	-	Hesperetin C-hexosyl-O-hexosyl-O-hexoside	Flavone C-glycosides	3420000	3480000	3100000	2870000	2780000	3880000	2890000	2680000	2640000
pmb0618	627.1	430	2.78	626.1	[M+H]+	-	8-C-hexosyl-hesperetin O-hexoside	Flavone C-glycosides	1510000	1790000	1830000	668000	735000	834000	849000	884000	795000
pmb0619	775.1	774.9	2.67	774.1	[M+H]+	-	Eriodictiol 6-C-hexoside 8-C-hexoside-O-hexoside	Flavone C-glycosides	7030000	8780000	8520000	6270000	6600000	6800000	6340000	6840000	6480000
pmb0620	787.1	344.1	2.77	786.1	[M+H]+	-	Chrysoeriol 6-C-hexoside 8-C-hexoside-O-hexoside	Flavone C-glycosides	3380000	3080000	3200000	3230000	3700000	4930000	3090000	2870000	2670000
pmb0621	641.1	623	3.09	640.1	[M+H]+	-	C-hexosyl-isorhamnetin O-hexoside	Flavone C-glycosides	46100	50100	58800	27100	20800	28500	9	9	9
pmb0622	611.2	412.3	3.09	610.2	[M+H]+	-	C-hexosyl-luteolin O-hexoside	Flavone C-glycosides	399000	453000	442000	27300	34500	37300	213000	233000	211000
pmb0623	625.2	398.1	2.96	624.2	[M+H]+	-	6-C-hexosyl chrysoeriol O-hexoside	Flavone C-glycosides	193000	283000	233000	107000	120000	183000	122000	136000	123000
pmb0624	611.1	329	3.09	610.1	[M+H]+	-	6-C-hexosyl-luteolin O-hexoside	Flavone C-glycosides	101000	70600	96100	38600	34000	81200	49400	61700	60000
pmb0626	757.1	757	3.1	756.1	[M+H]+	-	6-C-hexosyl-apigenin O-hexosyl-O-hexoside	Flavone C-glycosides	50500	38700	38500	7740	21800	23500	37100	46000	41800
pmb0628	613.1	300.3	3.09	612.1	[M+H]+	-	Eriodictiol C-hexosyl-O-hexoside	Flavone C-glycosides	387000	381000	378000	246000	274000	304000	262000	282000	397000
pmb0629	463.1	379.6	3.04	462.1	[M+H]+	-	Chrysoeriol 6-C-hexoside	Flavone C-glycosides	21400	18700	13700	32500	29100	30500	26300	29200	25700
pmb0639	757.2	757	3.13	756.2	[M+H]+	-	8-C-hexosyl-apigenin O-hexosyl-O-hexoside	Flavone C-glycosides	524000	641000	583000	129000	123000	174000	122000	102000	113000
pmb0644	449.1	329.6	3.45	448.1	[M+H]+	-	Luteolin C-hexoside	Flavone C-glycosides	1860000	1780000	1630000	2100000	1970000	2710000	2750000	2580000	2580000
pmb0645	627.1	447.3	3.41	626.1	[M+H]+	-	6-C-hexosyl-hesperetin O-hexoside	Flavone C-glycosides	4400000	4760000	5470000	4010000	4150000	5150000	5020000	4720000	4520000
pmb0647	581.1	449.2	3.46	580.1	[M+H]+	-	8-C-hexosyl-luteolin O-pentoside	Flavone C-glycosides	1860000	1770000	1810000	1890000	1650000	2060000	2830000	2580000	2530000
pmb0653	595.1	415.4	3.68	594.1	[M+H]+	-	"di-C,C-hexosyl-apigenin"	Flavone C-glycosides	493000	365000	304000	755000	786000	1070000	548000	466000	394000
pmb0661	609.1	463.4	3.87	608.1	[M+H]+	-	Chrysoeriol C-hexosyl-O-rhamnoside	Flavone C-glycosides	2910000	2350000	2090000	3520000	4320000	6170000	5260000	3960000	4400000
pmb0663	611.1	299.8	3.75	610.1	[M+H]+	-	8-C-hexosyl-luteolin O-hexoside	Flavone C-glycosides	451000	547000	406000	643000	680000	910000	637000	611000	668000
pmb0665	611.2	299.8	3.78	610.2	[M+H]+	-	Luteolin 8-C-hexosyl-O-hexoside	Flavone C-glycosides	5840000	5390000	6300000	1980000	2180000	1890000	3580000	3480000	3410000
pmb0672	771.1	367.9	4.02	770.1	[M+H]+	-	6-C-hexosyl-apigenin O-feruloylhexoside	Flavone C-glycosides	111000	66100	153000	33600	58000	65300	186000	191000	142000
pmb0675	711.2	693.1	4.1	710.2	[M+H]+	-	C-pentosyl-apigenin O-p-coumaroylhexoside	Flavone C-glycosides	48300	72200	66000	69000	92700	105000	57300	67900	47600
pmb0676	801	801	4.18	800	[M+H]+	-	8-C-hexosyl-chrysoeriol O-feruloylhexoside	Flavone C-glycosides	97400	108000	114000	154000	146000	253000	259000	163000	123000
pmb0682	801	783.1	4.31	800	[M+H]+	-	8-C-hexosyl-apigenin O-sinapoylhexoside	Flavone C-glycosides	496000	536000	501000	219000	216000	341000	269000	247000	236000
pmb0686	537	289.7	4.41	536	[M+H]+	-	Eriodictyol O-malonylhexoside	Flavanone	2090000	1730000	1480000	874000	1050000	1250000	1420000	1570000	1650000
pmb0691	757.1	757	3.09	756.1	[M+H]+	-	Luteolin C-hexosyl-O-rhamnoside O-hexoside	Flavone C-glycosides	58100	35100	58700	22200	20000	18800	15200	16100	19100
pmb0695	771.1	771	3.44	770.1	[M+H]+	-	C-hexosyl-chrysoeriol O-rutinoside	Flavone C-glycosides	27200	40400	24800	40900	45200	39000	43000	52400	58400
pmb0696	625	397.8	3.46	624	[M+H]+	-	8-C-hexosyl chrysoeriol O-hexoside	Flavone C-glycosides	4200000	3720000	3950000	8210000	9660000	12400000	7860000	6980000	6870000
pmb0706	713.1	713.1	2.96	712.1	[M+H]+	-	Quercetin 5-O-malonylhexosyl-hexoside	Flavonol	90200	122000	107000	9	15100	24200	30500	41400	46500
pmb0709	713.1	303.6	3.49	712.1	[M+H]+	-	Quercetin 7-O-malonylhexosyl-hexoside	Flavonol	4110000	3970000	3960000	4180000	4110000	5520000	5910000	5830000	5570000
pmb0711	611.2	303.7	3.7	610.2	[M+H]+	-	Quercetin 7-O-rutinoside	Flavonol	1800000	2120000	1860000	391000	527000	497000	870000	940000	1070000
pmb0712	655.2	331.7	3.5	654.2	[M+H]+	-	Tricin 5-O-hexosyl-O-hexoside	Flavone	60400	22900	43700	9	9	9	82400	64400	41700
pmb0713	655.2	331.7	3.37	654.2	[M+H]+	-	Tricin 7-O-hexosyl-O-hexoside	Flavone	105000	128000	123000	49900	60300	83600	33700	21000	26000
pmb0716	655.2	331.7	4.16	654.2	[M+H]+	-	Tricin di-O-hexoside	Flavone	32000	56500	60800	47800	24700	22600	45000	42700	33200
pmb0720	579.1	331.7	4.56	578.1	[M+H]+	-	Tricin O-malonylhexoside	Flavone	7190000	6590000	6120000	7250000	7460000	9040000	3360000	3110000	3150000
pmb0733	639.1	331.8	4.07	638.1	[M+H]+	-	Tricin 5-O-rutinoside	Flavone	167000	151000	160000	235000	242000	303000	391000	344000	309000
pmb0735	507.1	331.8	4.18	506.1	[M+H]+	-	Tricin O-glucuronic acid	Flavone	216000	187000	193000	227000	224000	334000	39300	63500	47600
pmb0736	493.1	331.8	4.3	492.1	[M+H]+	-	Tricin 7-O-hexoside	Flavone	349000	292000	289000	108000	96600	127000	66300	63500	60900
pmb0746	527.1	331.7	5.84	526.1	[M+H]+	-	Tricin 4'-O-β-guaiacylglycerol	Flavonolignan	181000	187000	163000	73900	65800	75200	24100	32700	39300
pmb0835	611.2	611.1	2.36	610.2	[M+H]+	-	Gallocatechin-gallocatechin	Catechin derivatives	1300000	1440000	1400000	1660000	1650000	2100000	1030000	1090000	1160000
pmb2586	593.1	549.4	3.72	594.1	[M-H]-	-	Gallocatechin-catechin	Catechin derivatives	145000	154000	184000	93200	125000	166000	129000	128000	117000
pmb2831	315.1	153.2	2.44	316.1	[M-H]-	-	Protocatechuic acid O-glucoside	Catechin derivatives	240000	274000	303000	462000	410000	402000	277000	308000	265000
pmb2850	329	314.2	5.73	330	[M-H]-	-	Tricin	Flavone	227000	242000	260000	60100	69300	69500	86700	83800	76700
pmb2957	465.1	285.3	2.59	466.1	[M-H]-	-	Cyanidin O-syringic acid	Anthocyanins	8660	12600	15400	7620	10900	13100	4030	4600	3930
pmb2959	489.1	285.3	2.94	490.1	[M-H]-	-	Cyanidin O-acetylhexoside	Anthocyanins	8070	11700	9140	4270	4910	5650	8170	5980	6110
pmb2961	547.1	503.4	3	548.1	[M-H]-	-	Peonidin O-malonylhexoside	Anthocyanins	12100	12600	16500	13100	13300	17000	30600	28500	31100
pmb2962	473.1	269.3	3.19	474.1	[M-H]-	-	Pelargonidin O-acetylhexoside	Anthocyanins	3260	3990	3330	1710	1220	2800	2060	5190	1270
pmb2970	625.2	463.3	2.19	626.2	[M-H]-	-	Hesperetin O-hexosyl-O-hexoside	Flavanone	3830	5430	4440	5140	4700	4960	9	9	9
pmb2973	740.1	431.2	3.34	741.1	[M-H]-	-	Chrysoeriol 6-C-pentosyl-O-rutinoside	Flavone C-glycosides	9660	9330	10600	9	2090	2200	1280	9	9
pmb2975	477.1	357.3	3.53	478.1	[M-H]-	-	Hesperetin O-Glucuronic acid	Flavanone	29000	36200	36700	37200	44600	61500	71600	75700	67900
pmb2976	755.1	311.4	3.74	756.1	[M-H]-	-	Chrysoeriol C-pentosyl-O-hexosyl-O-hexoside	Flavone C-glycosides	800000	912000	954000	509000	599000	685000	383000	421000	358000
pmb2978	563.1	269.3	4.04	564.1	[M-H]-	-	Apigenin O-hexosyl-O-pentoside	Flavone	184000	188000	187000	89800	78700	92500	54300	51100	56400
pmb2981	739.1	431.4	4.3	740.1	[M-H]-	-	Apigenin C-hexosyl-O-rutinoside	Flavone C-glycosides	13300	12500	16900	5050	9	9	9	3610	4440
pmb2984	491.1	287.3	5.09	492.1	[M-H]-	-	Acetyl-eriodictyol O-hexoside	Flavone	91600	134000	137000	113000	115000	130000	179000	166000	117000
pmb2987	487.1	283.2	2.63	488.1	[M-H]-	-	Acacetin O-acetyl hexoside	Flavone	27400	33900	43700	8770	9490	9150	54700	55800	40900
pmb2988	624.1	285.3	3.15	625.1	[M-H]-	-	Luteolin O-hexosyl-O-gluconic acid	Flavone	8210000	7790000	8030000	10000000	15400000	15500000	11900000	10500000	11100000
pmb2992	459.1	283.2	3.75	460.1	[M-H]-	-	Acacetin O-glucuronic acid	Flavone	636000	428000	535000	778000	1020000	611000	472000	656000	400000
pmb2999	461.1	285.2	3.87	462.1	[M-H]-	-	Chrysoeriol 5-O-hexoside	Flavone	2170000	2050000	2140000	9	9	9	447000	651000	616000
pmb3000	503.1	341.3	3.94	504.1	[M-H]-	-	Chrysoeriol O-acetylhexoside	Flavone	136000	128000	157000	35000	44300	35800	73100	94300	85000
pmb3005	621.1	299.4	4.07	622.1	[M-H]-	-	Chrysoeriol O-rhamnosyl-O-glucuronic acid	Flavone	45100	78700	79900	67800	95100	106000	83000	80300	63100
pmb3013	519.1	315.3	4.32	520.1	[M-H]-	-	Isorhamnetin O-acetyl-hexoside	Flavonol	2400000	2540000	2810000	4060000	4390000	4550000	5920000	6010000	5520000
pmb3014	641.1	285.2	4.67	642.1	[M-H]-	-	Luteolin O-eudesmic acid-O-hexoside	Flavone	11000	19100	18200	19700	23500	23900	16400	23300	16200
pmb3023	449.1	329.3	3.37	450.1	[M-H]-	-	Eriodictyol C-hexoside	Flavone C-glycosides	6460000	6960000	8270000	1580000	1830000	2090000	1630000	1840000	1570000
pmb3026	505.1	301.2	3.8	506.1	[M-H]-	-	Quercetin O-acetylhexoside	Flavonol	1080000	1500000	1300000	423000	525000	612000	797000	810000	830000
pmb3028	535	329.4	3.75	536	[M-H]-	-	Tricin O-sinapic acid	Flavone	1680000	2020000	2210000	626000	739000	802000	986000	1130000	871000
pmb3041	521.1	329.3	3.81	522.1	[M-H]-	-	Tricin O-saccharic acid	Flavone	732000	835000	736000	698000	708000	656000	261000	266000	232000
pmb3042	491.1	329.3	4	492.1	[M-H]-	-	Tricin 5-O-hexoside	Flavone	106000	155000	140000	77400	97900	107000	135000	135000	97700
pmb3047	657.1	495.3	4.5	658.1	[M-H]-	-	Tricin 4'-O-(syringyl alcohol) ether 5-O-hexoside	Flavonolignan	20900	21300	32400	19000	15800	16800	25900	21900	19000
pmb3114	561.1	271.3	3.61	562.1	[M-H]-	-	Epicatechin-epiafzelechin	Catechin derivatives	67700	79800	92800	2060	9	2880	8560	8110	7290
pmb3894	329.1	314.3	5.91	330.1	[M-H]-	-	Di-O-methylquercetin	Flavonol	42200000	48400000	54300000	23700000	24400000	23600000	32300000	29700000	26500000
pmc1990	299.1	74.8	6.78	300.1	[M-H]-	-	"4'-Hydroxy-5,7-dimethoxyflavanone"	Flavanone	377000	416000	655000	169000	74300	77000	57400	66100	224000
pme0001	609.2	301.3	4.07	610.19	[M-H]-	C09806	Hesperetin 7-O-neohesperidoside (Neohesperidin)	Flavanone	74100000	81900000	80200000	35000000	33000000	56300000	47300000	38100000	36900000
pme0088	285	133.1	5	286	[M-H]-	C01514	Luteolin	Flavone	1220000	1360000	1220000	277000	226000	238000	374000	306000	342000
pme0199	301	151.1	5.12	302.043	[M-H]-	C00389	Quercetin	Flavonol	17400000	17900000	18700000	8180000	8450000	8070000	7950000	6020000	8230000
pme0200	287	287	5.73	286.048	[M+H]+	C05903	Kaempferol	Flavonol	1010000	988000	932000	71000	61700	66700	188000	153000	198000
pme0202	611.2	303	3.7	610.153	[M+H]+	C05625	Quercetin 3-O-rutinoside (Rutin)	Flavonol	13600000	14200000	12600000	19300000	19900000	29900000	18500000	15800000	16200000
pme0204	539.1	403	5.88	538.09	[M+H]+	C10018	Amentoflavone	Flavone	19900	18300	12200	82200	33800	35000	24300	31800	24200
pme0321	431.1	285.1	4.94	432.106	[M-H]-	-	Kaempferol 7-O-rhamnoside	Flavonol	9470000	10700000	11900000	1090000	1060000	1130000	1710000	1870000	1490000
pme0324	255.1	69.7	6.95	254.058	[M+H]+	C10028	Chrysin	Flavone	80000	69600	72900	58500	49700	56400	197000	191000	174000
pme0330	579.2	135	4.17	580.179	[M-H]-	C09789	Naringenin 7-O-neohesperidoside (Naringin)	Flavanone	2140000	2310000	2350000	1280000	1190000	1210000	1530000	1450000	1410000
pme0332	577.2	269.1	4.01	578.164	[M-H]-	C12627	Apigenin 7-O-neohesperidoside (Rhoifolin)	Flavone	534000	597000	570000	254000	267000	277000	231000	213000	219000
pme0359	433.1	313.1	3.81	432.106	[M+H]+	-	Apigenin 5-O-glucoside	Flavone	62700	53800	38500	32200	9	9	77000	103000	65300
pme0361	435.1	303	3.98	434.085	[M+H]+	-	Quercetin 3-alpha-L-arabinofuranoside (Avicularin)	Flavonol	369000	305000	400000	191000	164000	201000	344000	394000	323000
pme0363	299.1	284	5.76	300.063	[M-H]-	C04293	Chrysoeriol	Flavone	10800000	10300000	10400000	3110000	2340000	2590000	4000000	3720000	4150000
pme0367	577.2	269.1	4.01	578.164	[M-H]-	-	Apigenin 7-rutinoside (Isorhoifolin)	Flavone	1450000	1720000	1480000	902000	860000	1190000	661000	584000	599000
pme0369	593.2	285.1	3.83	594.159	[M-H]-	-	Kaempferol 3-O-rutinoside (Nicotiflorin)	Flavonol	430000	435000	420000	546000	754000	845000	411000	365000	353000
pme0371	433.1	122.9	4.22	434.121	[M-H]-	C09099	Naringenin 7-O-glucoside (Prunin)	Flavanone	9610000	10300000	9910000	10600000	9600000	8280000	9720000	10200000	10200000
pme0377	273.1	153.1	5.59	272.068	[M+H]+	C00509	Naringenin	Flavanone	14700000	14300000	13700000	5290000	5570000	5480000	11800000	11600000	11400000
pme0379	271.1	215.1	5.63	270.053	[M+H]+	C01477	Apigenin	Flavone	5510000	5530000	5400000	579000	583000	688000	3030000	2510000	2830000
pme0421	275.1	107	5.56	274.084	[M+H]+	C00774	Phloretin	Flavanone	94800	90800	73800	114000	124000	128000	140000	134000	146000
pme0435	579.1	127.3	3.03	578.142	[M+H]+	-	Procyanidin B2	Proanthocyanidins	7420	9790	8850	9	9	5120	7560	11000	9900
pme0442	303	149.3	2.98	303.24	Protonated	C05908	Delphinidin	Anthocyanins	494000	547000	481000	122000	100000	148000	143000	172000	162000
pme0443	493	331.7	2.94	493	Protonated	-	Malvidin 3-O-galactoside	Anthocyanins	164000	177000	178000	94800	94600	131000	163000	159000	152000
pme0444	493.2	331.6	2.92	493.2	Protonated	C12140	Malvidin 3-O-glucoside (Oenin)	Anthocyanins	531000	583000	634000	319000	356000	360000	457000	529000	487000
pme1398	465.1	303.1	2.26	465.1	Protonated	C12138	Delphinidin 3-O-glucoside (Mirtillin)	Anthocyanins	779000	727000	798000	786000	885000	1160000	694000	683000	740000
pme1486	457.2	169.1	3.33	458.085	[M-H]-	C09731	Epigallate catechin gallate (EGCG)	Catechin derivatives	3810	3620	3900	9	994	1460	2230	9	9
pme1500	313.1	283.1	7.23	314.079	[M-H]-	-	Kumatakenin	Flavonol	7240	6580	5870	5040	6360	5000	14500	8590	10000
pme1510	269.1	251.1	5.94	270.053	[M-H]-	C10023	"Baicalein (5,6,7-Trihydroxyflavone)"	Flavone	82100	86300	73000	13200	14700	15600	39900	40200	47600
pme1514	305	125	2.76	306	[M-H]-	C12136	Epigallocatechin (EGC)	Catechin derivatives	10200	11900	15800	6740	5210	4510	5550	3780	6360
pme1518	403.1	373.1	7.06	402.132	[M+H]+	C10112	Nobiletin	Flavone	132000	131000	130000	189000	356000	180000	151000	93700	104000
pme1524	305.1	153	4.14	304.058	[M+H]+	C01617	Dihydroquercetin (Taxifolin)	Flavonol	169000	188000	199000	128000	143000	131000	166000	110000	87300
pme1535	305	125	2.28	306.074	[M-H]-	C12127	(+)-Gallocatechin (GC)	Catechin derivatives	10700	12600	17100	7600	5550	5610	5830	5600	6260
pme1539	623.2	314	3.66	624.169	[M-H]-	-	Isorhamnetin 3-O-neohesperidoside	Flavonol	4710000	4950000	5070000	7600000	7980000	8510000	9570000	9570000	8390000
pme1544	285.1	284.9	7.06	284.069	[M+H]+	C01470	Acacetin	Flavone	27900	29000	31300	34900	34100	41000	73400	60600	76300
pme1547	445.1	269	4.09	446.085	[M-H]-	C10025	Baicalein-7-O-glucuronide (Baicalin)	Flavone	443000	522000	518000	303000	404000	494000	337000	347000	392000
pme1550	373.1	373.1	7.54	372.121	[M+H]+	C10190	Tangeretin	Flavone	75800	75300	75900	128000	182000	98500	86300	59800	62400
pme1551	463.1	300	3.63	464.096	[M-H]-	C10108	Myricetin 3-O-rhamnoside (Myricitrin)	Flavonol	39500	30400	38800	9110	7640	6770	7230	6830	8400
pme1562	441.3	289.1	3.89	442.3	[M-H]-	-	Epicatechin gallate (ECG)	Catechin derivatives	163000	221000	234000	71400	82600	89000	259000	289000	235000
pme1568	285	257.1	5.08	286.048	[M-H]-	C10510	"Orobol (5,7,3',4'-tetrahydroxyisoflavone)"	Isoflavone	224000	230000	205000	46700	35800	35700	75600	49400	61300
pme1578	271.1	215.1	5.52	270.053	[M+H]+	C06563	"Genistein (4',5,7-Trihydroxyisoflavone)"	Isoflavone	127000	127000	111000	9	9	9	70800	66400	63900
pme1580	287.1	135.1	5.05	288.063	[M-H]-	C05631	Eriodictyol	Flavanone	3010000	3040000	2980000	492000	433000	468000	1680000	1690000	1680000
pme1587	417.1	255.1	3.36	416.111	[M+H]+	C10216	Daidzein 7-O-glucoside (Daidzin)	Isoflavone	100000	154000	167000	148000	181000	248000	222000	188000	173000
pme1588	315.1	300.1	5.85	316.058	[M-H]-	C10084	Isorhamnetin	Flavonol	1200000	1200000	1150000	2160000	1850000	2000000	1750000	1540000	1890000
pme1598	463.1	301.1	3.85	464.132	[M-H]-	-	Hesperetin 5-O-glucoside	Flavanone	23200000	23100000	25300000	9140000	8310000	7600000	10800000	11100000	9770000
pme1606	595.2	287	3.76	594.159	[M+H]+	-	Kaempferol 3-O-robinobioside (Biorobin)	Flavonol	12400000	11800000	12500000	8350000	10200000	11800000	11400000	9220000	10300000
pme1611	433.1	433	3.75	434.121	[M-H]-	-	Isohemiphloin	Alkaloids	52200	66900	63300	43300	49800	48500	47800	40400	31500
pme1624	433.1	313.1	3.78	432.106	[M+H]+	C01714	Isovitexin	Flavone C-glycosides	1710000	1750000	1710000	761000	773000	1170000	2220000	2210000	1900000
pme1662	287.1	287.1	6.96	286.084	[M+H]+	C09833	sakuranetin	Flavone	58700	60900	63800	205000	76000	73800	144000	113000	95900
pme1773	595	287.9	2.7	595	Protonated	C08620	Cyanidin 3-O-rutinoside (Keracyanin)	Anthocyanins	760000	853000	763000	113000	131000	206000	48200	41700	63700
pme1777	611	287.7	2.08	611	Protonated	C08639	"Cyanidin 3,5-O-diglucoside (Cyanin)"	Anthocyanins	42100	60800	64200	5480	3340	5920	17500	22100	19000
pme1824	153.1	109.1	2.48	154.027	[M-H]-	C00230	Protocatechuic acid	Catechin derivatives	23600	32600	44100	7570	6540	2720	42800	38900	39700
pme2319	301.1	242.1	5.75	302.079	[M-H]-	C01709	Hesperetin	Flavanone	75500	70100	79400	10700	8840	10400	39000	46200	40900
pme2457	447.3	285.1	3.87	448.101	[M-H]-	-	Luteolin 7-O-glucoside (Cynaroside)	Flavone	5480000	6100000	6270000	1420000	958000	942000	1930000	1890000	1880000
pme2482	139.1	93	3.03	138.032	[M+H]+	C16700	Protocatechuic aldehyde	Catechin derivatives	312000	395000	372000	86100	85200	96800	309000	285000	276000
pme2491	577.5	431	3.74	578.164	[M-H]-	C16981	"Kaempferol 3,7-dirhamnoside (Kaempferitrin)"	Flavonol	56500	73100	85700	47400	42700	43800	73200	76900	65200
pme2898	321.1	153.1	3.52	320.053	[M+H]+	C02906	Dihydromyricetin	Flavonol	530000	589000	571000	624000	550000	648000	533000	515000	478000
pme2949	609.2	301.1	4.08	610.19	[M-H]-	C09755	Hesperetin 7-rutinoside (Hesperidin)	Flavanone	24300000	27800000	27500000	11300000	13300000	16100000	15200000	15300000	12700000
pme2960	273.1	153.1	5.57	272.069	[M+H]+	C06561	Naringenin chalcone	Flavanone	14300000	14300000	13500000	5460000	5550000	5570000	11500000	11700000	11600000
pme2963	287.1	125.1	4.62	288.063	[M-H]-	C00974	Aromadedrin (Dihydrokaempferol)	Flavonol	3650000	3620000	3550000	4110000	3520000	2950000	2110000	2180000	2150000
pme2975	677.2	369.2	4.98	676.237	[M+H]+	C17555	"Icariin (kaempferol 3,7-O-diglucoside 8-prenyl derivative)"	Flavonol	227000	220000	291000	227000	232000	300000	335000	287000	289000
pme2979	255.1	151.1	7.04	256.074	[M-H]-	C09827	Pinocembrin (Dihydrochrysin)	Flavanone	9880	9280	8380	3940	3440	4050	19700	10700	10500
pme3130	465	302.9	3.86	464.096	[M+H]+	-	Quercetin 4'-O-glucoside (Spiraeoside)	Flavonol	383000	426000	408000	263000	320000	682000	399000	530000	349000
pme3137	239	165.1	7.73	238.063	[M+H]+	C20871	3-Hydroxyflavone	Flavonol	338000	342000	337000	283000	349000	344000	584000	576000	543000
pme3210	433	270.9	4.01	432.106	[M+H]+	C09126	Genistein 7-O-Glucoside (Genistin)	Isoflavone	220000	183000	245000	118000	116000	137000	255000	198000	178000
pme3212	465	302.8	3.87	464.096	[M+H]+	C05623	Quercetin 3-O-glucoside (Isotrifoliin)	Flavonol	401000	432000	481000	350000	357000	468000	558000	422000	423000
pme3217	257	137.1	6.09	256.074	[M+H]+	C08650	Isoliquiritigenin	Flavanone	348000	272000	276000	17400	18000	16200	9	9	11800
pme3227	579	433.1	3.68	578.164	[M+H]+	C12628	Vitexin 2''-O-beta-L-rhamnoside	Flavone C-glycosides	584000	516000	453000	545000	545000	646000	821000	700000	829000
pme3237	257	137.1	5.16	256.074	[M+H]+	C09762	Liquiritigenin	Flavanone	42400	48700	30700	9	6600	9	78300	73500	81700
pme3250	285	270.2	7	284.069	[M+H]+	C00814	Biochanin A	Isoflavone	40500	29900	29800	34500	39000	41500	90400	65000	85300
pme3256	611	303	2.37	611	Protonated	C16315	Delphinidin 3-O-rutinoside (Tulipanin)	Anthocyanins	133000	139000	157000	216000	332000	328000	257000	229000	298000
pme3263	269	225	4.43	270.053	[M-H]-	C02495	2'-Hydroxydaidzein	Isoflavone	81900	82000	103000	81100	79700	82400	60000	55300	52500
pme3267	447	284	3.86	448.101	[M-H]-	C12626	Kaempferol 3-O-galactoside (Trifolin)	Flavonol	28700000	31900000	34600000	21800000	24100000	25400000	19500000	19700000	16900000
pme3279	287	217.1	4.89	286.048	[M+H]+	C12134	2'-Hydroxygenistein	Isoflavone	7310000	7570000	6190000	807000	1220000	1520000	2070000	1680000	1840000
pme3282	273	97	3.4	274.084	[M-H]-	C09320	"Afzelechin (3,5,7,4'-Tetrahydroxyflavan)"	Flavanone	115000	155000	155000	79500	128000	101000	149000	121000	120000
pme3292	283	268.1	6.97	284.069	[M-H]-	C10521	Prunetin	Isoflavone	33700	37900	40900	43400	57500	62100	90100	65500	70800
pme3297	433	287	4.49	432.106	[M+H]+	C16911	Kaempferol 3-O-rhamnoside (Kaempferin)	Flavonol	8460000	8970000	10600000	1370000	1610000	1770000	3110000	3370000	2850000
pme3300	301	149.1	4.51	302.043	[M-H]-	C10192	Tricetin	Flavone	156000	137000	147000	63500	49700	61200	95300	73500	88900
pme3391	479	317	2.56	479	Protonated	C12139	Petunidin 3-O-glucoside	Anthocyanins	103000	92700	95200	58200	62300	94000	78500	88500	102000
pme3396	289	215.1	3.65	288.063	[M+H]+	C01378	Fustin	Flavonol	160000	209000	150000	56900	80400	127000	78900	9	9
pme3399	445.1	283.1	5.16	446.121	[M-H]-	C05376	Sissotrin	Isoflavone	286000	330000	334000	32000	38300	35400	168000	170000	162000
pme3404	347	287.1	5.8	346.069	[M+H]+	C11620	Syringetin	Flavonol	11900	7810	9820	12200	8390	12800	16500	9420	10000
pme3442	477.1	301.1	3.76	478.36	[M-H]-	-	Quercetin 7-O-β-D-Glucuronide	Flavonol	518000	600000	588000	901000	1330000	1630000	704000	682000	691000
pme3461	301.1	151	5.75	302.279	[M-H]-	C09756	Homoeriodictyol	Flavanone	507000	483000	578000	98300	65800	58800	214000	166000	214000
pme3464	285.1	164	6.98	286.084	[M-H]-	C05334	Isosakuranetin (4'-Methylnaringenin)	Flavanone	11300	9860	12200	16100	15600	17700	22900	8430	10800
pme3469	741.2	433.2	3.35	740.216	[M+H]+	C10178	Kaempferol-3-O-robinoside-7-O-rhamnoside (Robinin)	Flavonol	218000	215000	205000	121000	141000	143000	95400	83600	88600
pme3475	273.1	153.1	5.59	272.069	[M+H]+	C09614	Butin	Flavone	13400000	13500000	13400000	4830000	5030000	4990000	10900000	11100000	10400000
pme3484	479.1	317.3	3.53	480.09	[M-H]-	-	Myricetin 3-O-galactoside	Flavonol	729000	803000	845000	747000	889000	886000	730000	711000	648000
pme3502	429.1	267.1	4.59	430.126	[M-H]-	C10509	Formononetin 7-O-glucoside (Ononin)	Isoflavone	146000	150000	168000	33900	26300	25300	63800	68400	63500
pme3505	353.2	233.2	8.4	354.147	[M-H]-	C16417	Xanthohumol	Flavanone	4250	3640	4580	9	9	9	4390	3890	2910
pme3514	301	151.1	5.11	302.043	[M-H]-	C10105	Morin	Flavonol	15900000	17900000	17500000	7800000	7700000	7710000	7700000	5960000	7360000
pme3609	287	231.6	3.54	287.24	Protonated	C05905	Cyanidin	Anthocyanins	4210000	4060000	3520000	5290000	4610000	5370000	3660000	3860000	3910000
MWS4047	910	810.2	8.18	910	[M+H]+	-	carthamin	quinone chalcone	85500	51000	79800	12000	13400	12100	33600	36180	32065
MWS4046	613.177	451	2.8	612.169	[M+H]+	-	Hydroxysafflor yellow A	quinone chalcone	2340000	2710000	2820000	1580000	1610000	1810000	3223200	3316600	3656200
