# Supplementary material for: Integrated metabolomics and transcriptome analysis on flavonoid biosynthesis in flowers of safflower (Carthamus tinctorius L.) during colour-transition
Source: PeerJ. 2022 Jun 22;10:e13591. doi: 10.7717/peerj.13591 (PMC9233481; doi:10.7717/peerj.13591)
Supplement: Supplemental Information 2 [file peerj-10-13591-s002.xlsx]

## Sheet: Sheet1
Index	Compounds	Class	M-early1	M-early2	M-early3	M-late1	M-late2	M-late3	VIP	Fold_Change	LogFC	type
pma0724	Naringenin C-hexoside	Flavone C-glycosides	9	9	9	46100	69100	55600	3.25499	6325.93	12.6271	up
pma1590	Peonidin O-hexoside	Anthocyanins	9	9	9	65800	42700	38100	3.22334	5429.63	12.4066	up
pma2088	Quercetin-3,4'-O-di-beta-glucopyranoside	Flavonol	1360000	1260000	1430000	3900000	3710000	3270000	1.08974	2.68642	1.42568	up
pma3443	Tricin 7-O-acetylglucoside	Flavone	9	9	9	9	11600	9	1.14321	430.296	8.74919	up
pma6639	Isorhamnetin O-hexoside	Flavonol	1610000	1840000	2290000	5750000	5620000	5110000	1.12408	2.87108	1.52159	up
pmb0621	C-hexosyl-isorhamnetin O-hexoside	Flavone C-glycosides	27100	20800	28500	9	9	9	3.10269	0.000353403	-11.4664	down
pmb0622	C-hexosyl-luteolin O-hexoside	Flavone C-glycosides	27300	34500	37300	213000	233000	211000	1.51338	6.62967	2.72894	up
pmb0672	6-C-hexosyl-apigenin O-feruloylhexoside	Flavone C-glycosides	33600	58000	65300	186000	191000	142000	1.18175	3.30784	1.72589	up
pmb0706	Quercetin 5-O-malonylhexosyl-hexoside	Flavonol	9	15100	24200	30500	41400	46500	1.45428	3.01203	1.59074	up
pmb0712	Tricin 5-O-hexosyl-O-hexoside	Flavone	9	9	9	82400	64400	41700	3.26836	6981.48	12.7693	up
pmb0720	Tricin O-malonylhexoside	Flavone	7250000	7460000	9040000	3360000	3110000	3150000	1.03809	0.405053	-1.30382	down
pmb0735	Tricin O-glucuronic acid	Flavone	227000	224000	334000	39300	63500	47600	1.39882	0.191592	-2.38389	down
pmb2957	Cyanidin O-syringic acid	Anthocyanins	7620	10900	13100	4030	4600	3930	1.01318	0.397217	-1.332	down
pmb2970	Hesperetin O-hexosyl-O-hexoside	Flavanone	5140	4700	4960	9	9	9	2.76548	0.00182432	-9.09842	down
pmb2987	Acacetin O-acetyl hexoside	Flavone	8770	9490	9150	54700	55800	40900	1.43144	5.52353	2.46559	up
pmb2999	Chrysoeriol 5-O-hexoside	Flavone	9	9	9	447000	651000	616000	3.65952	63481.5	15.954	up
pmb3041	Tricin O-saccharic acid	Flavone	698000	708000	656000	261000	266000	232000	1.09843	0.368089	-1.44187	down
pmb3114	Epicatechin-epiafzelechin	Catechin derivatives	2060	9	2880	8560	8110	7290	1.52561	4.84138	2.27542	up
pme0200	Kaempferol	Flavonol	71000	61700	66700	188000	153000	198000	1.08656	2.70311	1.43462	up
pme0324	Chrysin	Flavone	58500	49700	56400	197000	191000	174000	1.21802	3.41434	1.77161	up
pme0359	Apigenin 5-O-glucoside	Flavone	32200	9	9	77000	103000	65300	2.42492	7.61376	2.92861	up
pme0379	Apigenin	Flavone	579000	583000	688000	3030000	2510000	2830000	1.34906	4.52432	2.1777	up
pme0435	Procyanidin B2	Proanthocyanidins	9	9	5120	7560	11000	9900	2.09294	5.53912	2.46966	up
pme1510	Baicalein (5,6,7-Trihydroxyflavone)	Flavone	13200	14700	15600	39900	40200	47600	1.13591	2.93563	1.55367	up
pme1562	Epicatechin gallate (ECG)	Catechin derivatives	71400	82600	89000	259000	289000	235000	1.18506	3.22222	1.68806	up
pme1578	Genistein (4',5,7-Trihydroxyisoflavone)	Isoflavone	9	9	9	70800	66400	63900	3.28825	7448.15	12.8627	up
pme1580	Eriodictyol	Flavanone	492000	433000	468000	1680000	1690000	1680000	1.24939	3.62527	1.85809	up
pme1773	Cyanidin 3-O-rutinoside (Keracyanin)	Anthocyanins	113000	131000	206000	48200	41700	63700	1.09051	0.341333	-1.55075	down
pme1777	Cyanidin 3,5-O-diglucoside (Cyanin)	Anthocyanins	5480	3340	5920	17500	22100	19000	1.28164	3.97558	1.99116	up
pme1824	Protocatechuic acid	Catechin derivatives	7570	6540	2720	42800	38900	39700	1.54845	7.21331	2.85066	up
pme2319	Hesperetin	Flavanone	10700	8840	10400	39000	46200	40900	1.31704	4.21176	2.07442	up
pme2482	Protocatechuic aldehyde	Catechin derivatives	86100	85200	96800	309000	285000	276000	1.19267	3.24506	1.69824	up
pme2979	Pinocembrin (Dihydrochrysin)	Flavanone	3940	3440	4050	19700	10700	10500	1.18937	3.5783	1.83928	up
pme3217	Isoliquiritigenin	Flavanone	17400	18000	16200	9	9	11800	2.15208	0.229031	-2.12639	down
pme3237	Liquiritigenin	Flavanone	9	6600	9	78300	73500	81700	2.65145	35.2826	5.14088	up
pme3396	Fustin	Flavonol	56900	80400	127000	78900	9	9	2.28723	0.298593	-1.74375	down
pme3399	Sissotrin	Isoflavone	32000	38300	35400	168000	170000	162000	1.37245	4.73037	2.24195	up
pme3461	Homoeriodictyol	Flavanone	98300	65800	58800	214000	166000	214000	1.06844	2.66487	1.41407	up
pme3505	Xanthohumol	Flavanone	9	9	9	4390	3890	2910	2.69981	414.444	8.69503	up
MWS4047	carthamin	tinctormine	12000	13400	12100	33600	36180	32065	1.09974	2.71587	1.44141	up
MWS4046	Hydroxysafflor yellow A	tinctormine	1580000	1610000	1810000	3223200	3316600	3656200	1.02834	2.0392	1.028	up
