# Supplementary material for: Integrated metabolomics and transcriptome analysis on flavonoid biosynthesis in flowers of safflower (Carthamus tinctorius L.) during colour-transition
Source: PeerJ. 2022 Jun 22;10:e13591. doi: 10.7717/peerj.13591 (PMC9233481; doi:10.7717/peerj.13591)
Supplement: Supplemental Information 3 [file peerj-10-13591-s003.xlsx]

## Sheet: Sheet1
Sample	Raw reads	Clean reads	Clean Base	Error rate	Q20	Q30	GC content
T-early1	47354476	46997626	7.01G	0.0002	0.977	0.936	0.4598
T-early2	56437422	56088930	8.37G	0.0002	0.9756	0.9321	0.4595
T-early3	50223258	49936602	7.45G	0.0002	0.9728	0.9254	0.4597
T-late1	52514210	52169324	7.77G	0.0002	0.9765	0.9345	0.4727
T-late2	52899506	52592330	7.83G	0.0002	0.9766	0.9346	0.467
T-late3	61165230	60790884	9.06G	0.0002	0.978	0.9376	0.4692
