# Supplementary material for: Integrated metabolomics and transcriptome analysis on flavonoid biosynthesis in flowers of safflower (Carthamus tinctorius L.) during colour-transition
Source: PeerJ. 2022 Jun 22;10:e13591. doi: 10.7717/peerj.13591 (PMC9233481; doi:10.7717/peerj.13591)
Supplement: Supplemental Information 4 [file peerj-10-13591-s004.xlsx]

## Sheet: Sheet1
Term	Number	Mean Length	Median Length	Max Length	N50	N90	Total Bases
Transcript	437060	735.19	436	14365	1157	292	321322927
Unigene	270890	594.41	336	14365	880	253	161018583
