# Supplementary material for: Integrated metabolomics and transcriptome analysis on flavonoid biosynthesis in flowers of safflower (Carthamus tinctorius L.) during colour-transition
Source: PeerJ. 2022 Jun 22;10:e13591. doi: 10.7717/peerj.13591 (PMC9233481; doi:10.7717/peerj.13591)
Supplement: Supplemental Information 6 [file peerj-10-13591-s006.xlsx]

## Sheet: Sheet1
ID	T-late	T-early	log2FoldChange	pvalue	FDR	regulation	GO	KEGG	KOG	NR	SwissProt	TrEMBL
TRINITY_DN100295_c3_g1	38122.1	57.9229	9.36	0	0	up	--	--	--	--	--	--
TRINITY_DN100964_c6_g5	170.257	2868.32	-4.07	0	0	down	GO:0048046,apoplast; GO:0016787,hydrolase activity; GO:0016042,lipid catabolic process	--	At3g11210	gb|PLY79892.1|	CPR49_ARATH, RecName: Full=GDSL esterase/lipase CPRD49; EC=3.1.1.-; AltName: Full=Extracellular lipase CPRD49; Flags: Precursor;	A0A251T233_HELAN, SubName: Full=Putative SGNH hydrolase-type esterase superfamily protein {ECO:0000313|EMBL:OTG05158.1};
TRINITY_DN101811_c1_g1	1186.8	8035.49	-2.76	0	0	down	--	--	--	gb|KVI02179.1|	--	A0A103Y443_CYNCS, SubName: Full=Uncharacterized protein {ECO:0000313|EMBL:KVI02179.1}; Flags: Fragment;
TRINITY_DN101883_c0_g2	62629.3	477.499	7.03	0	0	up	--	--	--	--	--	--
TRINITY_DN103920_c0_g2	250.138	5187.82	-4.37	0	0	down	GO:0005737,cytoplasm; GO:0005874,microtubule; GO:0005634,nucleus; GO:0005516,calmodulin binding; GO:0008017,microtubule binding	--	At3g09710	gb|KVI06899.1|	IQD1_ARATH, RecName: Full=Protein IQ-DOMAIN 1 {ECO:0000303|PubMed:15960618};	A0A103YD42_CYNCS, SubName: Full=IQ motif, EF-hand binding site-containing protein {ECO:0000313|EMBL:KVI06899.1};
TRINITY_DN105407_c6_g1	17.3455	132245	-12.9	0	0	down	--	--	--	--	--	--
TRINITY_DN105984_c1_g3	14612.6	168.715	6.44	0	0	up	--	--	--	--	--	--
TRINITY_DN106569_c6_g2	417.302	4177.55	-3.32	0	0	down	GO:0009507,chloroplast; GO:0005524,ATP binding; GO:0042026,protein refolding	K04077: groEL, HSPD1; chaperonin GroEL	At1g55490	gb|PLY87073.1|	RUBB_PEA, RecName: Full=RuBisCO large subunit-binding protein subunit beta, chloroplastic; AltName: Full=60 kDa chaperonin subunit beta; AltName: Full=CPN-60 beta; Flags: Precursor;	A0A251TPX4_HELAN, SubName: Full=Putative chaperonin 60 beta {ECO:0000313|EMBL:OTG12793.1};
TRINITY_DN106813_c1_g1	89.9563	1705.19	-4.25	0	0	down	--	--	At2g33420	gb|KVI00382.1|	--	A0A103Y0Q9_CYNCS, SubName: Full=Mammalian uncoordinated homology 13, domain 2 {ECO:0000313|EMBL:KVI00382.1};
TRINITY_DN106814_c0_g1	55921.9	1073.78	5.7	0	0	up	GO:0048046,apoplast; GO:0005618,cell wall; GO:0004866,endopeptidase inhibitor activity	--	At1g17860	ref|XP_022039672.1|	KTI2_ARATH, RecName: Full=Kunitz trypsin inhibitor 2 {ECO:0000305}; Short=AtKTI2 {ECO:0000305}; Flags: Precursor;	A0A251UV81_HELAN, SubName: Full=Putative kunitz family trypsin and protease inhibitor protein {ECO:0000313|EMBL:OTG26682.1};
TRINITY_DN106814_c1_g2	26235	451.925	5.86	0	0	up	GO:0048046,apoplast; GO:0005618,cell wall; GO:0004866,endopeptidase inhibitor activity	--	At1g17860	ref|XP_022039672.1|	KTI2_ARATH, RecName: Full=Kunitz trypsin inhibitor 2 {ECO:0000305}; Short=AtKTI2 {ECO:0000305}; Flags: Precursor;	A0A251UV81_HELAN, SubName: Full=Putative kunitz family trypsin and protease inhibitor protein {ECO:0000313|EMBL:OTG26682.1};
TRINITY_DN106865_c2_g2	636.51	3048.1	-2.26	0	0	down	GO:0047763,caffeate O-methyltransferase activity; GO:0046983,protein dimerization activity; GO:0009809,lignin biosynthetic process	K13066: E2.1.1.68, COMT; caffeic acid 3-O-methyltransferase [EC:2.1.1.68]	At5g54160	dbj|BAG71895.1|	COMT1_ZINVI, RecName: Full=Caffeic acid 3-O-methyltransferase; Short=CAOMT; Short=COMT; EC=2.1.1.68; AltName: Full=S-adenosysl-L-methionine:caffeic acid 3-O-methyltransferase;	B6F0V0_CARTI, SubName: Full=5-hydroxyconiferaldehyde O-methyltransferase {ECO:0000313|EMBL:BAG71895.1};
TRINITY_DN106911_c0_g3	12.9573	8071.59	-9.3	0	0	down	--	--	--	--	--	--
TRINITY_DN106976_c1_g1	843.627	12039.5	-3.83	0	0	down	--	--	--	--	--	--
TRINITY_DN107015_c1_g2	15575.8	1397.64	3.48	0	0	up	GO:0005739,mitochondrion; GO:0071949,FAD binding; GO:0004657,proline dehydrogenase activity; GO:0006562,proline catabolic process; GO:0010133,proline catabolic process to glutamate; GO:0006970,response to osmotic stress; GO:0009414,response to water deprivation	K00318: PRODH; proline dehydrogenase [EC:1.5.-.-]	At5g38710	gb|AHJ08573.1|	PROD2_ARATH, RecName: Full=Proline dehydrogenase 2, mitochondrial; EC=1.5.5.2; AltName: Full=Osmotic stress-induced proline dehydrogenase; AltName: Full=Proline oxidase; Flags: Precursor;	W6E4V4_HELTU, RecName: Full=Proline dehydrogenase {ECO:0000256|RuleBase:RU364054}; EC=1.5.5.2 {ECO:0000256|RuleBase:RU364054};
TRINITY_DN107800_c1_g5	12642.9	1492.36	3.08	0	0	up	--	--	--	--	--	--
TRINITY_DN108133_c1_g3	310.758	6884.5	-4.47	0	0	down	GO:0005829,cytosol; GO:0005524,ATP binding; GO:0004674,protein serine/threonine kinase activity; GO:0035556,intracellular signal transduction; GO:0006468,protein phosphorylation	--	At3g18750	ref|XP_010100703.1|	WNK4_ORYSJ, RecName: Full=Probable serine/threonine-protein kinase WNK4; Short=OsWNK4; EC=2.7.11.1; AltName: Full=Protein kinase with no lysine 4;	W9RDN2_9ROSA, SubName: Full=Putative serine/threonine-protein kinase WNK4 {ECO:0000313|EMBL:EXB83865.1};
TRINITY_DN108224_c1_g1	561.633	13624.3	-4.6	0	0	down	--	--	--	gb|PLY81758.1|	--	--
TRINITY_DN108244_c1_g4	19818.1	2274.89	3.12	0	0	up	--	--	--	--	--	--
TRINITY_DN108261_c0_g2	49918.1	18537	1.43	0	0	up	GO:0004066,asparagine synthase (glutamine-hydrolyzing) activity; GO:0005524,ATP binding; GO:0006541,glutamine metabolic process; GO:0070981,L-asparagine biosynthetic process	K01953: asnB, ASNS; asparagine synthase (glutamine-hydrolysing) [EC:6.3.5.4]	At3g47340	gb|KZN05047.1|	ASNS_TRIVS, RecName: Full=Asparagine synthetase [glutamine-hydrolyzing]; EC=6.3.5.4; AltName: Full=Glutamine-dependent asparagine synthetase;	A0A161Y6M2_DAUCA, SubName: Full=Uncharacterized protein {ECO:0000313|EMBL:KZN05047.1};
TRINITY_DN108401_c1_g1	11418.9	34493.1	-1.6	0	0	down	--	--	--	--	--	--
TRINITY_DN108460_c6_g1	5683.01	16489.3	-1.54	0	0	down	GO:0005794,Golgi apparatus; GO:0000139,Golgi membrane; GO:0016021,integral component of membrane; GO:0005886,plasma membrane; GO:0016760,cellulose synthase (UDP-forming) activity; GO:0016759,cellulose synthase activity; GO:0071555,cell wall organization; GO:0030244,cellulose biosynthetic process; GO:0009833,plant-type primary cell wall biogenesis	--	At2g32540	gb|KVH88967.1|	CSLH3_ORYSJ, RecName: Full=Putative cellulose synthase-like protein H3; EC=2.4.1.-; AltName: Full=OsCslH3;	A0A103XDY1_CYNCS, SubName: Full=Cellulose synthase {ECO:0000313|EMBL:KVH88967.1};
TRINITY_DN96874_c4_g1	19097.9	1675.52	3.51	0	0	up	--	--	--	--	--	--
TRINITY_DN97358_c0_g1	118727	411.238	8.17	0	0	up	--	--	--	--	--	--
TRINITY_DN97363_c0_g1	281.8	4674.95	-4.05	0	0	down	GO:0055046,microgametogenesis; GO:0009555,pollen development	K19613: SHOC2, SUR8; leucine-rich repeat protein SHOC2	At5g05850	gb|PLY89399.1|	PIRL1_ARATH, RecName: Full=Plant intracellular Ras-group-related LRR protein 1;	A0A251TJZ5_HELAN, SubName: Full=Putative leucine-rich repeat domain, L domain-like protein {ECO:0000313|EMBL:OTG11204.1};
TRINITY_DN97964_c0_g1	397.172	6897.47	-4.12	0	0	down	--	--	At5g56750	gb|ACT21092.1|	SF21_HELAN, RecName: Full=Pollen-specific protein SF21;	C7DYB7_SENSQ, SubName: Full=ORSF21B {ECO:0000313|EMBL:ACT21092.1};
TRINITY_DN98282_c0_g2	181.303	2252.62	-3.63	0	0	down	--	--	At3g28630	gb|KVI09075.1|	--	A0A118K5G7_CYNCS, SubName: Full=Uncharacterized protein {ECO:0000313|EMBL:KVI09075.1};
TRINITY_DN98623_c2_g2	80.306	1639.18	-4.35	0	0	down	GO:0005615,extracellular space; GO:0004806,triglyceride lipase activity; GO:0016042,lipid catabolic process	K01052: LIPA; lysosomal acid lipase/cholesteryl ester hydrolase [EC:3.1.1.13]	At2g15230	ref|XP_021988654.1|	LIP1_ARATH, RecName: Full=Triacylglycerol lipase 1; EC=3.1.1.3; Flags: Precursor;	A0A251TJH5_HELAN, RecName: Full=Lipase {ECO:0000256|PIRNR:PIRNR000862};
TRINITY_DN98912_c0_g2	76.6168	5808.28	-6.24	0	0	down	--	--	--	--	--	--
TRINITY_DN99650_c0_g1	1230.64	6128.88	-2.32	0	0	down	GO:0004013,adenosylhomocysteinase activity; GO:0051287,NAD binding; GO:0006730,one-carbon metabolic process; GO:0019510,S-adenosylhomocysteine catabolic process	K01251: E3.3.1.1, ahcY; adenosylhomocysteinase [EC:3.3.1.1]	At4g13940	ref|XP_021972196.1|	SAHH_PETCR, RecName: Full=Adenosylhomocysteinase; Short=AdoHcyase; EC=3.3.1.1; AltName: Full=S-adenosyl-L-homocysteine hydrolase;	A0A251U8U5_HELAN, RecName: Full=Adenosylhomocysteinase {ECO:0000256|RuleBase:RU000548}; EC=3.3.1.1 {ECO:0000256|RuleBase:RU000548};
TRINITY_DN99186_c5_g3	87.8288	2554.43	-4.86	6.93e-308	1.14e-304	down	GO:0005634,nucleus; GO:0005886,plasma membrane; GO:0005524,ATP binding; GO:0004693,cyclin-dependent protein serine/threonine kinase activity; GO:0042742,defense response to bacterium; GO:0002229,defense response to oomycetes; GO:1900426,positive regulation of defense response to bacterium; GO:1902290,positive regulation of defense response to oomycetes; GO:0006468,protein phosphorylation; GO:2000…	--	At1g18670	gb|KVI09105.1|	IBS1_ARATH, RecName: Full=Protein IMPAIRED IN BABA-INDUCED STERILITY 1 {ECO:0000303|PubMed:15722464}; EC=2.7.11.- {ECO:0000255|PROSITE-ProRule:PRU00159};	A0A118K5I3_CYNCS, SubName: Full=Protein kinase, ATP binding site-containing protein {ECO:0000313|EMBL:KVI09105.1};
TRINITY_DN107560_c1_g1	6630.66	390.912	4.08	1.52e-305	2.44e-302	up	GO:0005737,cytoplasm; GO:0050113,inositol oxygenase activity; GO:0005506,iron ion binding; GO:0019310,inositol catabolic process; GO:0019853,L-ascorbic acid biosynthetic process	K00469: MIOX; inositol oxygenase [EC:1.13.99.1]	At4g26260	ref|XP_021969804.1|	MIOX4_ARATH, RecName: Full=Inositol oxygenase 4; EC=1.13.99.1; AltName: Full=Myo-inositol oxygenase 4; Short=AtMIOX4; Short=MI oxygenase 4;	A0A251UHB8_HELAN, SubName: Full=Putative myo-inositol oxygenase 4 {ECO:0000313|EMBL:OTG22494.1};
TRINITY_DN99186_c5_g2	126.522	1676.08	-3.73	1.31e-294	2.03e-291	down	GO:0005634,nucleus; GO:0005886,plasma membrane; GO:0005524,ATP binding; GO:0004693,cyclin-dependent protein serine/threonine kinase activity; GO:0042742,defense response to bacterium; GO:0002229,defense response to oomycetes; GO:1900426,positive regulation of defense response to bacterium; GO:1902290,positive regulation of defense response to oomycetes; GO:0006468,protein phosphorylation; GO:2000…	--	At1g74330	gb|KVI09105.1|	IBS1_ARATH, RecName: Full=Protein IMPAIRED IN BABA-INDUCED STERILITY 1 {ECO:0000303|PubMed:15722464}; EC=2.7.11.- {ECO:0000255|PROSITE-ProRule:PRU00159};	A0A118K5I3_CYNCS, SubName: Full=Protein kinase, ATP binding site-containing protein {ECO:0000313|EMBL:KVI09105.1};
TRINITY_DN106568_c1_g2	31.4943	1679.43	-5.74	4.68e-288	7.04e-285	down	GO:0005615,extracellular space; GO:0005507,copper ion binding; GO:0016491,oxidoreductase activity	--	At5g66920	ref|XP_021983127.1|	ASOL_TOBAC, RecName: Full=L-ascorbate oxidase homolog; EC=1.10.3.-; AltName: Full=Pollen-specific protein NTP303; Flags: Precursor;	A0A251U0C8_HELAN, SubName: Full=Putative SKU5 similar 17 {ECO:0000313|EMBL:OTG15691.1};
TRINITY_DN97045_c0_g3	3780.82	942.996	2	1.47e-286	2.15e-283	up	GO:0016021,integral component of membrane; GO:0005886,plasma membrane; GO:0005524,ATP binding; GO:0008553,proton-exporting ATPase activity, phosphorylative mechanism; GO:0046872,metal ion binding; GO:0006754,ATP biosynthetic process	K01535: PMA1, PMA2; H+-transporting ATPase [EC:3.6.3.6]	At4g30190	gb|PLY84328.1|	PMA4_NICPL, RecName: Full=Plasma membrane ATPase 4; EC=3.6.3.6; AltName: Full=Proton pump 4;	A0A251SYZ3_HELAN, RecName: Full=Plasma membrane ATPase {ECO:0000256|RuleBase:RU362083}; EC=3.6.3.6 {ECO:0000256|RuleBase:RU362083};
TRINITY_DN98933_c2_g1	92.1684	1716.74	-4.21	7.09e-285	1.01e-281	down	GO:0009507,chloroplast; GO:0009941,chloroplast envelope; GO:0009706,chloroplast inner membrane; GO:0031357,integral component of chloroplast inner membrane; GO:0009536,plastid; GO:0043621,protein self-association; GO:0010020,chloroplast fission; GO:0009658,chloroplast organization	--	At5g42480	gb|KVH98444.1|	ARC6_ARATH, RecName: Full=Protein ACCUMULATION AND REPLICATION OF CHLOROPLASTS 6, chloroplastic; Flags: Precursor;	A0A103XX19_CYNCS, SubName: Full=DnaJ domain-containing protein {ECO:0000313|EMBL:KVH98444.1};
TRINITY_DN105730_c3_g2	371.418	2558.94	-2.78	7.77e-282	1.07e-278	down	GO:0009543,chloroplast thylakoid lumen; GO:0016020,membrane; GO:0004175,endopeptidase activity; GO:0008236,serine-type peptidase activity	--	At3g57680	gb|PLY84273.1|	CTPA3_ARATH, RecName: Full=Carboxyl-terminal-processing peptidase 3, chloroplastic; EC=3.4.21.102; AltName: Full=D1 C-terminal processing protease 3; AltName: Full=Photosystem II D1 protein processing peptidase 3; Flags: Precursor;	A0A118K7D2_CYNCS, SubName: Full=Uncharacterized protein {ECO:0000313|EMBL:KVI12061.1};
TRINITY_DN98030_c1_g1	22.5421	3040.17	-7.08	3.92e-281	5.29e-278	down	GO:0005618,cell wall; GO:0005576,extracellular region; GO:0045330,aspartyl esterase activity; GO:0004857,enzyme inhibitor activity; GO:0030599,pectinesterase activity; GO:0042545,cell wall modification; GO:0045490,pectin catabolic process	K01051: E3.1.1.11; pectinesterase [EC:3.1.1.11]	At2g45220	gb|EOY22914.1|	PME2_CITSI, RecName: Full=Pectinesterase 2; Short=PE 2; EC=3.1.1.11; AltName: Full=Pectin methylesterase; Flags: Precursor;	A0A061G787_THECC, RecName: Full=Pectinesterase {ECO:0000256|RuleBase:RU000589}; EC=3.1.1.11 {ECO:0000256|RuleBase:RU000589};
TRINITY_DN105984_c1_g4	14339.8	139.943	6.68	6.07e-281	7.96e-278	up	GO:0008061,chitin binding; GO:0004568,chitinase activity; GO:0016998,cell wall macromolecule catabolic process; GO:0006032,chitin catabolic process; GO:0006952,defense response; GO:0000272,polysaccharide catabolic process	K20547: CHIB; basic endochitinase B [EC:3.2.1.14]	At3g12500	gb|PLY73724.1|	CHIX_PEA, RecName: Full=Endochitinase; EC=3.2.1.14; Flags: Precursor;	A0A103XK43_CYNCS, SubName: Full=Chitin-binding, type 1 {ECO:0000313|EMBL:KVH92153.1};
TRINITY_DN107475_c2_g1	2899.12	525.026	2.46	8.15e-281	1.04e-277	up	GO:0016021,integral component of membrane; GO:0005355,glucose transmembrane transporter activity; GO:0005351,carbohydrate:proton symporter activity; GO:0046323,glucose import; GO:0035428,NA	--	At5g18840	gb|PLY77813.1|	EDL16_ARATH, RecName: Full=Sugar transporter ERD6-like 16;	A0A251UH35_HELAN, SubName: Full=Putative major facilitator superfamily protein {ECO:0000313|EMBL:OTG22680.1};
TRINITY_DN99338_c1_g3	307.564	3140.52	-3.35	6.07e-276	7.58e-273	down	--	--	--	--	--	--
TRINITY_DN97544_c1_g1	176.974	2041.21	-3.53	1.53e-274	1.87e-271	down	GO:0005622,intracellular; GO:0005524,ATP binding; GO:0004672,protein kinase activity; GO:0004674,protein serine/threonine kinase activity; GO:0035556,intracellular signal transduction; GO:0018105,peptidyl-serine phosphorylation; GO:0018107,peptidyl-threonine phosphorylation; GO:0006468,protein phosphorylation; GO:0009268,response to pH	--	At2g30360	gb|KVH94124.1|	CIPKB_ARATH, RecName: Full=CBL-interacting serine/threonine-protein kinase 11; EC=2.7.11.1; AltName: Full=SNF1-related kinase 3.22; AltName: Full=SOS2-like protein kinase PKS5; AltName: Full=SOS3-interacting protein 4;	A0A103XP49_CYNCS, RecName: Full=Non-specific serine/threonine protein kinase {ECO:0000256|SAAS:SAAS00351747}; EC=2.7.11.1 {ECO:0000256|SAAS:SAAS00351747};
TRINITY_DN97312_c2_g2	10.3922	6498.96	-9.31	1.39e-268	1.65e-265	down	GO:0008289,lipid binding; GO:0006869,lipid transport	--	At2g38540	gb|KVH95031.1|	NLTP_MALDO, RecName: Full=Non-specific lipid-transfer protein; Short=LTP; AltName: Allergen=Mal d 3; Flags: Precursor;	A0A103XQG9_CYNCS, RecName: Full=Non-specific lipid-transfer protein {ECO:0000256|RuleBase:RU000628};
TRINITY_DN101096_c1_g3	479.99	6528.28	-3.77	6.47e-266	7.52e-263	down	GO:0004014,adenosylmethionine decarboxylase activity; GO:0006557,S-adenosylmethioninamine biosynthetic process; GO:0008295,spermidine biosynthetic process; GO:0006597,spermine biosynthetic process	K01611: speD, AMD1; S-adenosylmethionine decarboxylase [EC:4.1.1.50]	At3g02470	sp|O65354.1|	DCAM_HELAN, RecName: Full=S-adenosylmethionine decarboxylase proenzyme; Short=AdoMetDC; Short=SAMDC; EC=4.1.1.50; Contains: RecName: Full=S-adenosylmethionine decarboxylase alpha chain; Contains: RecName: Full=S-adenosylmethionine decarboxylase beta chain; Flags: Precursor;	A0A251SIK4_HELAN, RecName: Full=S-adenosylmethionine decarboxylase proenzyme {ECO:0000256|PIRNR:PIRNR001355}; EC=4.1.1.50 {ECO:0000256|PIRNR:PIRNR001355};
TRINITY_DN99334_c3_g1	3990.36	371.483	3.43	3.75e-265	4.27e-262	up	GO:0009507,chloroplast; GO:0009570,chloroplast stroma; GO:0005634,nucleus; GO:0009536,plastid	--	At4g36040	gb|KVI07796.1|	DNJ11_ARATH, RecName: Full=Chaperone protein dnaJ 11, chloroplastic; Short=AtDjC11; Short=AtJ11; Flags: Precursor;	A0A103YEV1_CYNCS, SubName: Full=DnaJ domain-containing protein {ECO:0000313|EMBL:KVI07796.1};
TRINITY_DN105407_c6_g2	4.53119	54487	-13.57	4.35e-264	4.84e-261	down	--	--	--	--	--	--
TRINITY_DN107305_c7_g1	970.87	13971.1	-3.85	3.38e-262	3.68e-259	down	--	--	At5g61260	--	--	A0A1U7WPE0_NICSY, SubName: Full=TNF receptor-associated factor family protein DDB_G0272098-like {ECO:0000313|RefSeq:XP_009779171.1};
TRINITY_DN98842_c7_g1	97.2003	2435.99	-4.65	5.58e-262	5.95e-259	down	--	--	--	--	--	--
TRINITY_DN102150_c1_g2	94.4001	1610.99	-4.09	9.56e-260	9.99e-257	down	--	K01759: GLO1, gloA; lactoylglutathione lyase [EC:4.4.1.5]	At1g04540	gb|KVI07335.1|	--	A0A118K4D6_CYNCS, SubName: Full=Uncharacterized protein {ECO:0000313|EMBL:KVI07335.1};
TRINITY_DN103537_c1_g1	72.3073	1280.76	-4.14	1.44e-259	1.48e-256	down	GO:0005905,clathrin-coated pit; GO:0030136,clathrin-coated vesicle; GO:0005794,Golgi apparatus; GO:0005545,1-phosphatidylinositol binding; GO:0030276,clathrin binding; GO:0048268,clathrin coat assembly; GO:0006897,endocytosis	--	At1g25240	gb|KVH97511.1|	CAP13_ARATH, RecName: Full=Putative clathrin assembly protein At1g25240;	A0A118JXU0_CYNCS, SubName: Full=Uncharacterized protein {ECO:0000313|EMBL:KVH97511.1};
TRINITY_DN104428_c2_g1	4598.5	958.853	2.26	8.36e-259	8.39e-256	up	--	--	At4g32480	gb|KVH89526.1|	--	A0A103XF22_CYNCS, SubName: Full=Uncharacterized protein {ECO:0000313|EMBL:KVH89526.1};
TRINITY_DN100462_c0_g3	7.86678	10721.3	-10.44	7.13e-258	7.02e-255	down	GO:0005618,cell wall; GO:0005576,extracellular region; GO:0071555,cell wall organization; GO:0006952,defense response	K20727: PDF1.2; defensin-like protein 16	At1g19610	sp|P22357.1|	SF18_HELAN, RecName: Full=Anther-specific protein SF18; AltName: Full=Defensin-like protein; Flags: Precursor; Fragment;	A0A118K6I4_CYNCS, SubName: Full=Uncharacterized protein {ECO:0000313|EMBL:KVI10697.1};
TRINITY_DN104042_c5_g2	2435.76	194.077	3.65	1.27e-257	1.23e-254	up	--	--	At1g63830	ref|XP_022000232.1|	--	A0A251SQ89_HELAN, SubName: Full=Putative PLAC8 family protein {ECO:0000313|EMBL:OTG00682.1};
TRINITY_DN100854_c1_g2	2695.77	229.83	3.55	4.5e-255	4.26e-252	up	GO:0005829,cytosol; GO:0016020,membrane; GO:0005730,nucleolus; GO:0005634,nucleus; GO:0005524,ATP binding; GO:0004612,phosphoenolpyruvate carboxykinase (ATP) activity; GO:0016036,cellular response to phosphate starvation; GO:0009817,defense response to fungus, incompatible interaction; GO:0006094,gluconeogenesis; GO:0046686,response to cadmium ion	K01610: E4.1.1.49, pckA; phosphoenolpyruvate carboxykinase (ATP) [EC:4.1.1.49]	At4g37870	ref|XP_022039916.1|	PCKA_ARATH, RecName: Full=Phosphoenolpyruvate carboxykinase (ATP); Short=PEP carboxykinase; Short=PEPCK; EC=4.1.1.49;	A0A251UV16_HELAN, SubName: Full=Putative phosphoenolpyruvate carboxykinase 1 {ECO:0000313|EMBL:OTG26889.1};
TRINITY_DN106383_c0_g2	9.90365	8247.18	-9.7	2.92e-253	2.72e-250	down	--	--	--	--	--	--
TRINITY_DN108005_c0_g4	10.1761	5604.22	-9.14	6.07e-252	5.55e-249	down	--	--	--	--	--	--
TRINITY_DN94888_c0_g1	771.842	5610.78	-2.86	9.16e-246	8.23e-243	down	--	--	--	--	--	--
TRINITY_DN101065_c9_g1	1336.64	300.924	2.14	1.9e-208	1.29e-205	up	GO:0035251,UDP-glucosyltransferase activity; GO:1900994,(-)-secologanin biosynthetic process	K00699: UGT; glucuronosyltransferase [EC:2.4.1.17]	At5g59590	gb|KVH94641.1|	UGT7_CATRO, RecName: Full=UDP-glucose iridoid glucosyltransferase; EC=2.4.1.-; AltName: Full=UDP-glucose glucosyltransferase 7; Short=CrUGT7; AltName: Full=UDP-glycosyltransferase 76A2;	A0A103XPP7_CYNCS, SubName: Full=UDP-glucuronosyl/UDP-glucosyltransferase {ECO:0000313|EMBL:KVH94641.1};
TRINITY_DN107207_c2_g3	1691.72	104.615	4.01	1.92e-239	1.66e-236	up	GO:0047274,galactinol-sucrose galactosyltransferase activity; GO:0005975,carbohydrate metabolic process	K06617: E2.4.1.82; raffinose synthase [EC:2.4.1.82]	At5g20250	gb|KVH93790.1|	RFS6_ARATH, RecName: Full=Probable galactinol--sucrose galactosyltransferase 6; EC=2.4.1.82; AltName: Full=Protein DARK INDUCIBLE 10; AltName: Full=Raffinose synthase 6;	A0A118JW99_CYNCS, SubName: Full=Aldolase-type TIM barrel {ECO:0000313|EMBL:KVH93790.1};
TRINITY_DN106679_c1_g5	67.6266	1449.07	-4.42	3.31e-237	2.83e-234	down	GO:0005737,cytoplasm; GO:0005856,cytoskeleton; GO:0005524,ATP binding	--	At5g09810	dbj|BAF68887.1|	ACT_GOSHI, RecName: Full=Actin;	A6P7L1_9LAMI, SubName: Full=Actin 3 {ECO:0000313|EMBL:BAF68887.1}; Flags: Fragment;
TRINITY_DN96219_c1_g2	479.429	5572.09	-3.54	7.08e-237	5.94e-234	down	GO:0000783,nuclear telomere cap complex; GO:0008301,DNA binding, bending; GO:0003691,double-stranded telomeric DNA binding; GO:0042162,telomeric DNA binding; GO:0006355,regulation of transcription, DNA-templated; GO:0009737,response to abscisic acid; GO:0046686,response to cadmium ion; GO:0009723,response to ethylene; GO:0009739,response to gibberellin; GO:0009753,response to jasmonic acid; GO:00…	--	At3g46590	gb|KVI06954.1|	TRP2_ARATH, RecName: Full=Telomere repeat-binding protein 2; AltName: Full=Protein TRF-LIKE 1;	A0A103YD85_CYNCS, SubName: Full=Homeodomain-like protein {ECO:0000313|EMBL:KVI06954.1};
TRINITY_DN107432_c7_g3	13021.3	1386.08	3.23	1.79e-236	1.47e-233	up	--	--	--	--	--	--
TRINITY_DN107297_c2_g4	4160.7	267.379	3.96	8.57e-235	6.96e-232	up	--	--	--	--	--	--
TRINITY_DN105878_c0_g1	1298.05	11080.4	-3.09	3.16e-232	2.53e-229	down	GO:0009507,chloroplast; GO:0009536,plastid; GO:0008889,glycerophosphodiester phosphodiesterase activity; GO:0000287,magnesium ion binding; GO:0030643,cellular phosphate ion homeostasis; GO:0006071,glycerol metabolic process; GO:0046475,glycerophospholipid catabolic process	K18696: GDE1; glycerophosphodiester phosphodiesterase [EC:3.1.4.46]	At3g02040	gb|KVI02410.1|	GDPD1_ARATH, RecName: Full=Glycerophosphodiester phosphodiesterase GDPD1, chloroplastic {ECO:0000305}; EC=3.1.4.46 {ECO:0000269|PubMed:21323773}; AltName: Full=Glycerophosphodiester phosphodiesterase 1 {ECO:0000303|PubMed:21323773}; Short=AtGDPD1 {ECO:0000303|PubMed:21323773}; AltName: Full=Protein SENESCENCE-RELATED GENE 3 {ECO:0000303|PubMed:8883383}; Flags: Precursor;	A0A103Y4K6_CYNCS, SubName: Full=Uncharacterized protein {ECO:0000313|EMBL:KVI02410.1};
TRINITY_DN95817_c0_g2	116.006	1446.74	-3.64	3.41e-228	2.69e-225	down	GO:0005737,cytoplasm; GO:0005634,nucleus; GO:0019005,SCF ubiquitin ligase complex; GO:0005774,vacuolar membrane; GO:0005516,calmodulin binding; GO:0004402,histone acetyltransferase activity; GO:0003712,transcription cofactor activity; GO:0031625,ubiquitin protein ligase binding; GO:0008270,zinc ion binding; GO:0043161,proteasome-mediated ubiquitin-dependent protein catabolic process; GO:0042787,N…	K02987: RP-S4e, RPS4; small subunit ribosomal protein S4e	At5g67480	gb|KVI08913.1|	BT4_ARATH, RecName: Full=BTB/POZ and TAZ domain-containing protein 4; AltName: Full=BTB and TAZ domain protein 4;	A0A118K5D2_CYNCS, SubName: Full=BTB/POZ-like protein {ECO:0000313|EMBL:KVI08913.1};
TRINITY_DN92336_c0_g2	163.489	16451.9	-6.65	2.13e-222	1.65e-219	down	--	--	--	--	--	--
TRINITY_DN107836_c0_g2	144353	70.824	10.99	5.68e-221	4.33e-218	up	GO:0005576,extracellular region	--	At4g30380	gb|KVI01363.1|	EGC_CITJA, RecName: Full=EG45-like domain containing protein; AltName: Full=Blight-associated protein p12; AltName: Full=Plant natriuretic peptide; Short=PNP; Flags: Precursor;	A0A118K0J5_CYNCS, SubName: Full=Uncharacterized protein {ECO:0000313|EMBL:KVI01363.1};
TRINITY_DN108261_c0_g3	21819.8	6677.61	1.71	5.75e-221	4.33e-218	up	--	--	--	--	--	--
TRINITY_DN95093_c0_g2	168.053	233789	-10.44	1.42e-216	1.06e-213	down	--	--	--	--	--	--
TRINITY_DN101883_c1_g2	60718.9	1465.92	5.37	2.66e-213	1.95e-210	up	--	--	--	--	--	--
TRINITY_DN106383_c0_g1	32.7329	38779.1	-10.22	2.8e-212	2.02e-209	down	GO:0031225,anchored component of membrane; GO:0031012,extracellular matrix; GO:0005886,plasma membrane; GO:0004222,metalloendopeptidase activity; GO:0008270,zinc ion binding	--	At1g59970	gb|KVD98127.1|	5MMP_ARATH, RecName: Full=Metalloendoproteinase 5-MMP {ECO:0000303|PubMed:10574937}; Short=At5-MMP {ECO:0000303|PubMed:10574937}; EC=3.4.24.- {ECO:0000305}; Flags: Precursor;	A0A103D5F5_CYNCS, SubName: Full=Metallopeptidase, catalytic domain-containing protein {ECO:0000313|EMBL:KVD98127.1}; Flags: Fragment;
TRINITY_DN108072_c2_g2	67.0015	1050.39	-3.97	1.26e-210	8.94e-208	down	--	--	--	ref|XP_022005392.1|	--	A0A251SMJ0_HELAN, SubName: Full=Putative calmodulin-binding domain, plant {ECO:0000313|EMBL:OTF98720.1};
TRINITY_DN104184_c2_g2	3081.26	275.389	3.48	2.82e-210	1.97e-207	up	--	--	At4g17370	gb|KVH91965.1|	--	A0A103XJN6_CYNCS, SubName: Full=NAD(P)-binding domain-containing protein {ECO:0000313|EMBL:KVH91965.1};
TRINITY_DN106701_c1_g4	177.372	1135.02	-2.68	1.15e-209	7.97e-207	down	--	--	At1g52140	gb|KVH97992.1|	--	A0A124SDT9_CYNCS, SubName: Full=Uncharacterized protein {ECO:0000313|EMBL:KVH97992.1};
TRINITY_DN103884_c1_g3	2673.14	602.914	2.15	1.91e-208	1.3e-205	up	--	--	--	gb|KVH92873.1|	--	A0A103XLH2_CYNCS, SubName: Full=Uncharacterized protein {ECO:0000313|EMBL:KVH92873.1};
TRINITY_DN104845_c1_g2	61.9843	1383.29	-4.49	1.09e-207	7.34e-205	down	GO:0005829,cytosol; GO:0009904,chloroplast accumulation movement; GO:0009903,chloroplast avoidance movement	--	At1g12150	gb|KVH96672.1|	Y1215_ARATH, RecName: Full=WEB family protein At1g12150;	A0A118JXP7_CYNCS, SubName: Full=Uncharacterized protein {ECO:0000313|EMBL:KVH96672.1};
TRINITY_DN102993_c1_g1	2886.71	293.251	3.3	9.14e-207	6.08e-204	up	--	--	--	--	--	--
TRINITY_DN101640_c2_g1	44.1526	1282.62	-4.87	3.76e-206	2.47e-203	down	--	--	At2g33350	gb|KVI08064.1|	--	A0A103YFC4_CYNCS, SubName: Full=CCT domain-containing protein {ECO:0000313|EMBL:KVI08064.1}; Flags: Fragment;
TRINITY_DN97460_c4_g1	1036.33	87.5185	3.56	1.01e-205	6.53e-203	up	--	--	At1g44542	gb|KVH91632.1|	--	A0A0V0INN6_SOLCH, SubName: Full=Putative ovule protein {ECO:0000313|EMBL:JAP34242.1};
TRINITY_DN100854_c1_g3	2850.27	87.3464	5.03	1.17e-205	7.48e-203	up	GO:0005829,cytosol; GO:0016020,membrane; GO:0005730,nucleolus; GO:0005634,nucleus; GO:0005524,ATP binding; GO:0004612,phosphoenolpyruvate carboxykinase (ATP) activity; GO:0016036,cellular response to phosphate starvation; GO:0009817,defense response to fungus, incompatible interaction; GO:0006094,gluconeogenesis; GO:0046686,response to cadmium ion	K01610: E4.1.1.49, pckA; phosphoenolpyruvate carboxykinase (ATP) [EC:4.1.1.49]	At4g37870	gb|PLY77028.1|	PCKA_ARATH, RecName: Full=Phosphoenolpyruvate carboxykinase (ATP); Short=PEP carboxykinase; Short=PEPCK; EC=4.1.1.49;	A0A251UV16_HELAN, SubName: Full=Putative phosphoenolpyruvate carboxykinase 1 {ECO:0000313|EMBL:OTG26889.1};
TRINITY_DN105230_c0_g3	410.97	2352.86	-2.52	1.42e-204	8.99e-202	down	--	--	--	gb|KVI02437.1|	--	A0A103Y4N2_CYNCS, SubName: Full=Gibberellin regulated protein {ECO:0000313|EMBL:KVI02437.1};
TRINITY_DN107438_c0_g1	498.788	5177.69	-3.38	1.44e-204	8.99e-202	down	GO:0005789,endoplasmic reticulum membrane; GO:0016021,integral component of membrane; GO:0016491,oxidoreductase activity; GO:0016717,oxidoreductase activity, acting on paired donors, with oxidation of a pair of donors resulting in the reduction of molecular oxygen to two molecules of water; GO:0006636,unsaturated fatty acid biosynthetic process; GO:0042761,very long-chain fatty acid biosynthetic …	--	At1g06080	gb|KVH98004.1|	ADS1_ARATH, RecName: Full=Delta-9 acyl-lipid desaturase 1; EC=1.14.19.-;	A0A118JY44_CYNCS, SubName: Full=Uncharacterized protein {ECO:0000313|EMBL:KVH98004.1}; Flags: Fragment;
TRINITY_DN99504_c0_g2	4940.28	574.156	3.11	5.73e-204	3.54e-201	up	GO:0009570,chloroplast stroma; GO:0009534,chloroplast thylakoid; GO:0016165,linoleate 13S-lipoxygenase activity; GO:0046872,metal ion binding; GO:0010597,green leaf volatile biosynthetic process; GO:0031408,oxylipin biosynthetic process	--	At3g45140	gb|KVH90897.1|	LOX21_SOLTU, RecName: Full=Linoleate 13S-lipoxygenase 2-1, chloroplastic; EC=1.13.11.12; AltName: Full=Lipoxygenase 2-1; Flags: Precursor;	A0A118JUA2_CYNCS, RecName: Full=Lipoxygenase {ECO:0000256|RuleBase:RU003975}; EC=1.13.11.- {ECO:0000256|RuleBase:RU003975}; Flags: Fragment;
TRINITY_DN100462_c1_g7	186.612	61205.3	-8.36	8.29e-202	5.05e-199	down	--	--	--	--	--	--
TRINITY_DN104459_c1_g3	38.8977	1245.45	-4.99	5.88e-201	3.54e-198	down	GO:0005783,endoplasmic reticulum; GO:0005768,endosome; GO:0016459,myosin complex; GO:0009524,phragmoplast; GO:0009506,plasmodesma; GO:0003779,actin binding; GO:0005524,ATP binding; GO:0005516,calmodulin binding; GO:0003774,motor activity; GO:0006897,endocytosis	--	At3g19960	gb|KVI05268.1|	MYO1_ARATH, RecName: Full=Myosin-1; AltName: Full=AtATM1;	A0A118K319_CYNCS, SubName: Full=IQ motif, EF-hand binding site-containing protein {ECO:0000313|EMBL:KVI05268.1};
TRINITY_DN104978_c0_g1	158148	67.7135	11.19	4.41e-200	2.63e-197	up	GO:0005576,extracellular region	--	At4g30380	gb|KVI01363.1|	EGC_CITJA, RecName: Full=EG45-like domain containing protein; AltName: Full=Blight-associated protein p12; AltName: Full=Plant natriuretic peptide; Short=PNP; Flags: Precursor;	A0A118K0J5_CYNCS, SubName: Full=Uncharacterized protein {ECO:0000313|EMBL:KVI01363.1};
TRINITY_DN101022_c6_g6	1328.69	3641.42	-1.45	9.2e-200	5.41e-197	down	--	--	--	gb|KVH89609.1|	--	A0A103XFA6_CYNCS, SubName: Full=Uncharacterized protein {ECO:0000313|EMBL:KVH89609.1};
TRINITY_DN107255_c0_g3	202.092	1487.66	-2.88	2.94e-198	1.71e-195	down	--	--	--	--	--	--
TRINITY_DN99007_c1_g1	175.627	1634.35	-3.22	3.99e-197	2.3e-194	down	--	--	--	--	--	--
TRINITY_DN99186_c2_g1	24.6339	1416.72	-5.84	1.18e-194	6.7e-192	down	--	--	--	gb|KVI09105.1|	--	A0A118K5I3_CYNCS, SubName: Full=Protein kinase, ATP binding site-containing protein {ECO:0000313|EMBL:KVI09105.1};
TRINITY_DN108343_c3_g3	333.818	135645	-8.67	1.27e-193	7.15e-191	down	--	--	--	--	--	--
TRINITY_DN101700_c1_g1	3615.39	645.605	2.49	2.17e-193	1.21e-190	up	GO:0009507,chloroplast; GO:0009570,chloroplast stroma; GO:0005634,nucleus; GO:0009536,plastid	--	At4g36040	gb|KVI02930.1|	DNJ11_ARATH, RecName: Full=Chaperone protein dnaJ 11, chloroplastic; Short=AtDjC11; Short=AtJ11; Flags: Precursor;	A0A103Y5K6_CYNCS, SubName: Full=DnaJ domain-containing protein {ECO:0000313|EMBL:KVI02930.1};
TRINITY_DN89957_c0_g1	121.388	2380.57	-4.29	5.44e-192	3e-189	down	GO:0005509,calcium ion binding	K13448: CML; calcium-binding protein CML	At1g18530	gb|KVI06486.1|	CML15_ARATH, RecName: Full=Probable calcium-binding protein CML15; AltName: Full=Calmodulin-like protein 15;	A0A103YCD8_CYNCS, SubName: Full=Calcium-binding EF-hand {ECO:0000313|EMBL:KVI06486.1};
TRINITY_DN102206_c0_g1	114.097	1880.12	-4.05	3.44e-191	1.87e-188	down	--	--	--	--	--	--
TRINITY_DN103520_c4_g2	6630.13	131.685	5.65	1.43e-188	7.71e-186	up	GO:0016298,lipase activity; GO:0080031,methyl salicylate esterase activity; GO:0009862,systemic acquired resistance, salicylic acid mediated signaling pathway	K20802: HNL; (R)-mandelonitrile lyase [EC:4.1.2.10]	At2g23620	gb|KVI02660.1|	SABP2_TOBAC, RecName: Full=Salicylic acid-binding protein 2; Short=NtSABP2; EC=3.1.1.-; AltName: Full=Methyl salicylate esterase;	A0A103Y513_CYNCS, SubName: Full=Uncharacterized protein {ECO:0000313|EMBL:KVI02660.1};
TRINITY_DN95093_c1_g2	34.8443	12805	-8.53	4.31e-188	2.3e-185	down	--	--	--	--	--	--
TRINITY_DN103432_c2_g5	88.152	974.896	-3.46	4.14e-187	2.18e-184	down	GO:0005829,cytosol; GO:0005886,plasma membrane; GO:0005524,ATP binding; GO:0004709,MAP kinase kinase kinase activity; GO:0004674,protein serine/threonine kinase activity; GO:0000187,activation of MAPK activity; GO:0032147,activation of protein kinase activity; GO:0071323,cellular response to chitin; GO:0006952,defense response; GO:0046777,protein autophosphorylation; GO:2000071,regulation of defe…	K04420: MAP3K2, MEKK2; mitogen-activated protein kinase kinase kinase 2 [EC:2.7.11.25]	At5g66850	gb|KVI09012.1|	M3K5G_ARATH, RecName: Full=Mitogen-activated protein kinase kinase kinase 5 {ECO:0000303|PubMed:27679653}; EC=2.7.11.25 {ECO:0000269|PubMed:27679653}; AltName: Full=MAP3K gamma protein kinase {ECO:0000303|PubMed:10095117}; Short=AtMAP3Kgamma {ECO:0000303|PubMed:10095117};	A0A103YH53_CYNCS, SubName: Full=Uncharacterized protein {ECO:0000313|EMBL:KVI09012.1};
TRINITY_DN95115_c1_g5	50.9495	1207.61	-4.57	4.79e-187	2.5e-184	down	--	--	--	--	--	--
TRINITY_DN104243_c0_g3	11800.3	894.62	3.72	6.87e-187	3.55e-184	up	GO:0008289,lipid binding; GO:0006869,lipid transport	--	At1g73780	gb|KVI00162.1|	NLTP_VIGUN, RecName: Full=Probable non-specific lipid-transfer protein AKCS9; Short=LTP; Flags: Precursor;	A0A103Y096_CYNCS, SubName: Full=Bifunctional inhibitor/plant lipid transfer protein/seed storage helical domain-containing protein {ECO:0000313|EMBL:KVI00162.1};
TRINITY_DN104794_c3_g1	1030.93	99.302	3.37	1.45e-185	7.42e-183	up	--	--	At4g35220	gb|KVH91632.1|	--	A0A118JUE7_CYNCS, SubName: Full=Putative cyclase {ECO:0000313|EMBL:KVH91632.1};
TRINITY_DN37620_c0_g1	54.4987	1212.83	-4.48	2.92e-185	1.48e-182	down	GO:0005730,nucleolus; GO:0005634,nucleus; GO:0005886,plasma membrane; GO:0009926,auxin polar transport; GO:0009734,auxin-activated signaling pathway; GO:0007275,multicellular organism development; GO:0046620,regulation of organ growth	K14488: SAUR; SAUR family protein	At1g29500	gb|KVI04031.1|	SAU66_ARATH, RecName: Full=Auxin-responsive protein SAUR66 {ECO:0000305}; AltName: Full=Protein SMALL AUXIN UP RNA 66 {ECO:0000303|PubMed:12036261};	A0A103Y7N8_CYNCS, SubName: Full=Uncharacterized protein {ECO:0000313|EMBL:KVI04031.1};
TRINITY_DN99334_c3_g6	2904.32	172.935	4.07	4.09e-184	2.05e-181	up	GO:0009507,chloroplast; GO:0009570,chloroplast stroma; GO:0005634,nucleus; GO:0009536,plastid	--	At4g36040	gb|KVI07796.1|	DNJ11_ARATH, RecName: Full=Chaperone protein dnaJ 11, chloroplastic; Short=AtDjC11; Short=AtJ11; Flags: Precursor;	A0A103YEV1_CYNCS, SubName: Full=DnaJ domain-containing protein {ECO:0000313|EMBL:KVI07796.1};
TRINITY_DN94744_c2_g3	442.483	2760.99	-2.64	9.26e-184	4.6e-181	down	--	--	--	gb|KVI00615.1|	--	A0A118K008_CYNCS, SubName: Full=Uncharacterized protein {ECO:0000313|EMBL:KVI00615.1};
TRINITY_DN95809_c4_g2	35.6538	11570.4	-8.34	2.01e-183	9.88e-181	down	--	--	--	--	--	--
TRINITY_DN106814_c1_g4	1154.6	22.4662	5.68	2.6e-182	1.27e-179	up	--	--	--	--	--	--
TRINITY_DN105501_c2_g1	2893.63	469.126	2.62	6.67e-181	3.22e-178	up	GO:0005829,cytosol; GO:0017017,MAP kinase tyrosine/serine/threonine phosphatase activity; GO:0004725,protein tyrosine phosphatase activity; GO:0006952,defense response; GO:0009651,response to salt stress; GO:0010224,response to UV-B; GO:0010225,response to UV-C	K04459: DUSP, MKP; dual specificity MAP kinase phosphatase [EC:3.1.3.16 3.1.3.48]	At3g55270	gb|KVH89239.1|	MKP1_ARATH, RecName: Full=Protein-tyrosine-phosphatase MKP1; EC=3.1.3.48; AltName: Full=Mitogen-activated protein kinase phosphatase 1; Short=AtMKP1;	A0A103XEG2_CYNCS, SubName: Full=Uncharacterized protein {ECO:0000313|EMBL:KVH89239.1};
TRINITY_DN101458_c0_g1	185.253	3084.72	-4.06	8.79e-181	4.2e-178	down	--	--	At5g21080	gb|KVH94768.1|	--	A0A103XQ39_CYNCS, SubName: Full=Armadillo-type fold {ECO:0000313|EMBL:KVH94768.1};
TRINITY_DN100628_c2_g2	17.0244	1155.56	-6.09	2.78e-179	1.32e-176	down	GO:0005634,nucleus; GO:0009734,auxin-activated signaling pathway; GO:0006355,regulation of transcription, DNA-templated; GO:0006351,transcription, DNA-templated	K14484: IAA; auxin-responsive protein IAA	At3g15540	ref|XP_021990205.1|	AUX22_SOYBN, RecName: Full=Auxin-induced protein AUX22;	A0A251TPA2_HELAN, RecName: Full=Auxin-responsive protein {ECO:0000256|RuleBase:RU004549};
TRINITY_DN108224_c1_g4	299.417	11143.5	-5.22	9.79e-179	4.6e-176	down	--	--	--	gb|PLY81758.1|	--	--
TRINITY_DN107940_c2_g1	28513.7	595.92	5.58	4.38e-177	2.04e-174	up	GO:0016298,lipase activity; GO:0080031,methyl salicylate esterase activity; GO:0009862,systemic acquired resistance, salicylic acid mediated signaling pathway	K20802: HNL; (R)-mandelonitrile lyase [EC:4.1.2.10]	At2g23620	gb|KVI02659.1|	SABP2_TOBAC, RecName: Full=Salicylic acid-binding protein 2; Short=NtSABP2; EC=3.1.1.-; AltName: Full=Methyl salicylate esterase;	A0A103Y528_CYNCS, SubName: Full=Uncharacterized protein {ECO:0000313|EMBL:KVI02659.1};
TRINITY_DN98205_c0_g4	17.6355	11500	-9.36	1.12e-175	5.16e-173	down	GO:0005576,extracellular region; GO:0006952,defense response; GO:0009607,response to biotic stimulus	K13449: PR1; pathogenesis-related protein 1	At4g33720	ref|XP_021985588.1|	PR1_SAMNI, RecName: Full=Pathogenesis-related protein PR-1 type; Flags: Precursor;	A0A251TK38_HELAN, SubName: Full=Putative cysteine-rich secretory protein, allergen V5/Tpx-1-related protein {ECO:0000313|EMBL:OTG10972.1};
TRINITY_DN80411_c0_g2	78.7936	1032.52	-3.71	4.38e-175	2e-172	down	GO:0005737,cytoplasm; GO:0005634,nucleus; GO:0016791,phosphatase activity; GO:0004725,protein tyrosine phosphatase activity	--	At3g02800	gb|PLY99732.1|	DSP3_ARATH, RecName: Full=Tyrosine-protein phosphatase DSP3 {ECO:0000305}; EC=3.1.3.48 {ECO:0000255|PROSITE-ProRule:PRU10044, ECO:0000269|PubMed:21409566}; AltName: Full=Protein PLANT AND FUNGI ATYPICAL DUAL-SPECIFICITY PHOSPHATASE 3 {ECO:0000303|PubMed:21409566}; Short=AtPFA-DSP3 {ECO:0000303|PubMed:21409566};	A0A103YEC9_CYNCS, SubName: Full=Protein-tyrosine phosphatase, dual specificity phosphatase, eukaryotic {ECO:0000313|EMBL:KVI07549.1};
TRINITY_DN40889_c0_g1	274.253	3103.74	-3.5	1.25e-174	5.66e-172	down	--	--	--	--	--	--
TRINITY_DN101883_c0_g1	132489	3019.82	5.46	3.68e-174	1.65e-171	up	--	--	--	--	--	--
TRINITY_DN104156_c1_g4	5.62512	5541.83	-9.99	1.98e-173	8.8e-171	down	--	--	--	--	--	--
TRINITY_DN106989_c10_g1	63.8414	308654	-12.24	1.85e-172	8.18e-170	down	--	--	--	--	--	--
TRINITY_DN85428_c1_g2	2917.19	82.591	5.14	4.19e-171	1.83e-168	up	--	--	--	--	--	--
TRINITY_DN107089_c3_g1	7947.52	658.098	3.59	3.66e-169	1.59e-166	up	GO:0009570,chloroplast stroma; GO:0009534,chloroplast thylakoid; GO:0016165,linoleate 13S-lipoxygenase activity; GO:0046872,metal ion binding; GO:0010597,green leaf volatile biosynthetic process; GO:0031408,oxylipin biosynthetic process	K00454: LOX2S; lipoxygenase [EC:1.13.11.12]	At3g45140	gb|KVH90897.1|	LOX21_SOLTU, RecName: Full=Linoleate 13S-lipoxygenase 2-1, chloroplastic; EC=1.13.11.12; AltName: Full=Lipoxygenase 2-1; Flags: Precursor;	A0A118JUA2_CYNCS, RecName: Full=Lipoxygenase {ECO:0000256|RuleBase:RU003975}; EC=1.13.11.- {ECO:0000256|RuleBase:RU003975}; Flags: Fragment;
TRINITY_DN104046_c3_g7	162.335	1176.06	-2.86	6.88e-169	2.96e-166	down	GO:0009507,chloroplast; GO:0016020,membrane; GO:0008289,lipid binding; GO:0007049,cell cycle; GO:0051301,cell division	--	At1g72160	gb|PLY88039.1|	PATL5_ARATH, RecName: Full=Patellin-5;	A0A103XYT7_CYNCS, SubName: Full=Uncharacterized protein {ECO:0000313|EMBL:KVH99423.1};
TRINITY_DN98200_c4_g1	647.637	4210	-2.7	9.74e-167	4.16e-164	down	GO:0005887,integral component of plasma membrane; GO:0009705,plant-type vacuole membrane; GO:0005773,vacuole; GO:0005366,myo-inositol:proton symporter activity; GO:0015798,myo-inositol transport	--	At2g43330	gb|PLY62489.1|	INT1_ARATH, RecName: Full=Inositol transporter 1;	A0A251VKF2_HELAN, SubName: Full=Putative inositol transporter 1 {ECO:0000313|EMBL:OTG35556.1};
TRINITY_DN102888_c1_g1	825.197	3165.3	-1.94	2.91e-166	1.23e-163	down	GO:0005737,cytoplasm; GO:0005634,nucleus; GO:0005524,ATP binding; GO:0004707,MAP kinase activity; GO:0010468,regulation of gene expression	K20537: MPK7_14; mitogen-activated protein kinase 7/14 [EC:2.7.11.24]	At2g18170	gb|KVI02874.1|	MPK4_ORYSJ, RecName: Full=Mitogen-activated protein kinase 4; Short=MAP kinase 4; EC=2.7.11.24; AltName: Full=Multiple stress-responsive MAP kinase 3; AltName: Full=OsMAP2; AltName: Full=OsMSRMK3;	A0A103Y5I6_CYNCS, RecName: Full=Mitogen-activated protein kinase {ECO:0000256|RuleBase:RU361165, ECO:0000256|SAAS:SAAS00652812}; EC=2.7.11.24 {ECO:0000256|RuleBase:RU361165, ECO:0000256|SAAS:SAAS00652812};
TRINITY_DN98961_c2_g7	101.722	2449.51	-4.59	3.83e-166	1.61e-163	down	GO:0005634,nucleus; GO:0009734,auxin-activated signaling pathway; GO:0006355,regulation of transcription, DNA-templated; GO:0006351,transcription, DNA-templated	K14484: IAA; auxin-responsive protein IAA	At5g43700	gb|KVI03889.1|	AX22D_VIGRR, RecName: Full=Auxin-induced protein 22D; AltName: Full=Indole-3-acetic acid-induced protein ARG13;	A0A103Y7E2_CYNCS, RecName: Full=Auxin-responsive protein {ECO:0000256|RuleBase:RU004549}; Flags: Fragment;
TRINITY_DN96587_c3_g1	3147.72	180.484	4.13	7.9e-166	3.29e-163	up	GO:0046658,anchored component of plasma membrane; GO:0005618,cell wall; GO:0005737,cytoplasm; GO:0005576,extracellular region; GO:0005634,nucleus; GO:0042973,glucan endo-1,3-beta-D-glucosidase activity; GO:0004553,hydrolase activity, hydrolyzing O-glycosyl compounds; GO:0030247,polysaccharide binding; GO:0005975,carbohydrate metabolic process; GO:0071555,cell wall organization; GO:0006952,defense…	K19891: GN1_2_3; glucan endo-1,3-beta-glucosidase 1/2/3 [EC:3.2.1.39]	At2g27500	gb|KVI08447.1|	E1314_ARATH, RecName: Full=Glucan endo-1,3-beta-glucosidase 14; EC=3.2.1.39; AltName: Full=(1->3)-beta-glucan endohydrolase 14; Short=(1->3)-beta-glucanase 14; AltName: Full=Beta-1,3-endoglucanase 14; Short=Beta-1,3-glucanase 14; Flags: Precursor;	A0A118K546_CYNCS, SubName: Full=Glycoside hydrolase, catalytic domain-containing protein {ECO:0000313|EMBL:KVI08447.1};
TRINITY_DN95625_c5_g1	316.623	2618.08	-3.05	4.09e-165	1.69e-162	down	GO:0005829,cytosol; GO:0012505,endomembrane system; GO:0004602,glutathione peroxidase activity; GO:0006979,response to oxidative stress	K00432: gpx; glutathione peroxidase [EC:1.11.1.9]	At3g63080	gb|PLY96527.1|	GPX4_ARATH, RecName: Full=Probable glutathione peroxidase 4; EC=1.11.1.9;	A0A068U5M9_COFCA, RecName: Full=Glutathione peroxidase {ECO:0000256|RuleBase:RU000499};
TRINITY_DN93882_c1_g2	1059.09	2778.26	-1.39	3.77e-164	1.55e-161	down	GO:0030015,CCR4-NOT core complex; GO:0005634,nucleus; GO:0000932,P-body; GO:0008408,3'-5' exonuclease activity; GO:0046872,metal ion binding; GO:0004535,poly(A)-specific ribonuclease activity; GO:0003723,RNA binding; GO:0042742,defense response to bacterium; GO:0043928,exonucleolytic nuclear-transcribed mRNA catabolic process involved in deadenylation-dependent decay; GO:0017148,negative regulati…	K12581: CNOT7_8, CAF1, POP2; CCR4-NOT transcription complex subunit 7/8	At5g22250	gb|KVH88265.1|	CAF1K_ARATH, RecName: Full=Probable CCR4-associated factor 1 homolog 11; EC=3.1.13.4;	A0A103XCP2_CYNCS, SubName: Full=Ribonuclease CAF1 {ECO:0000313|EMBL:KVH88265.1};
TRINITY_DN106118_c1_g5	270.057	1945.64	-2.85	4.28e-164	1.74e-161	down	GO:0055028,cortical microtubule; GO:0005737,cytoplasm; GO:0005524,ATP binding; GO:0008017,microtubule binding; GO:0003777,microtubule motor activity; GO:0071555,cell wall organization; GO:0007018,microtubule-based movement	--	At5g47820	gb|PLY68251.1|	KN4A_GOSHI, RecName: Full=Kinesin-like protein KIN-4A {ECO:0000305}; AltName: Full=GhKINESIN-4A {ECO:0000303|PubMed:25600279};	A0A251TZP9_HELAN, SubName: Full=Putative P-loop containing nucleoside triphosphate hydrolases superfamily protein {ECO:0000313|EMBL:OTG16052.1};
TRINITY_DN107371_c2_g1	7311.14	584.386	3.65	1.29e-162	5.22e-160	up	--	--	--	--	--	--
TRINITY_DN108244_c1_g1	1014.62	115.565	3.13	2.22e-162	8.9e-160	up	--	--	--	--	--	--
TRINITY_DN107604_c1_g1	25.538	1556.06	-5.94	8.18e-162	3.25e-159	down	GO:0005618,cell wall; GO:0005576,extracellular region; GO:0045330,aspartyl esterase activity; GO:0004857,enzyme inhibitor activity; GO:0030599,pectinesterase activity; GO:0042545,cell wall modification; GO:0045490,pectin catabolic process	K01051: E3.1.1.11; pectinesterase [EC:3.1.1.11]	At2g45220	ref|XP_021974188.1|	PME2_CITSI, RecName: Full=Pectinesterase 2; Short=PE 2; EC=3.1.1.11; AltName: Full=Pectin methylesterase; Flags: Precursor;	A0A251UE30_HELAN, RecName: Full=Pectinesterase {ECO:0000256|RuleBase:RU000589}; EC=3.1.1.11 {ECO:0000256|RuleBase:RU000589};
TRINITY_DN103881_c2_g3	91.3632	1040.26	-3.51	5.66e-160	2.23e-157	down	GO:0016021,integral component of membrane; GO:0030133,transport vesicle; GO:0017022,myosin binding	--	At5g06560	gb|KVH90528.1|	MYOB7_ARATH, RecName: Full=Myosin-binding protein 7 {ECO:0000303|PubMed:23995081};	A0A103XGW4_CYNCS, SubName: Full=Zein-binding domain-containing protein {ECO:0000313|EMBL:KVH90528.1};
TRINITY_DN99312_c4_g1	77.5837	1364.49	-4.14	1.07e-158	4.18e-156	down	GO:0042742,defense response to bacterium; GO:0016567,protein ubiquitination	--	At3g49970	gb|PLY92626.1|	SR1P1_ARATH, RecName: Full=BTB/POZ domain-containing protein SR1IP1 {ECO:0000305}; AltName: Full=Protein ATSR1-INTERACTION PROTEIN 1 {ECO:0000303|PubMed:24528504};	A0A251SH13_HELAN, SubName: Full=Putative SKP1/BTB/POZ domain, NPH3 domain protein {ECO:0000313|EMBL:OTF97861.1};
TRINITY_DN96874_c4_g2	11921	1083.56	3.46	2.35e-158	9.13e-156	up	--	--	--	--	--	--
TRINITY_DN98205_c0_g1	5.37711	6088.17	-10.13	3.68e-158	1.42e-155	down	GO:0005576,extracellular region; GO:0006952,defense response; GO:0009607,response to biotic stimulus	K13449: PR1; pathogenesis-related protein 1	At4g33720	gb|KVH93360.1|	PRB1_TOBAC, RecName: Full=Basic form of pathogenesis-related protein 1; Short=PRP 1; Flags: Precursor;	A0A103XME5_CYNCS, SubName: Full=Uncharacterized protein {ECO:0000313|EMBL:KVH93360.1};
TRINITY_DN99079_c1_g2	1325.33	2788.09	-1.07	8.12e-158	3.1e-155	down	--	K02996: RP-S9, MRPS9, rpsI; small subunit ribosomal protein S9	At3g27090	ref|XP_021982432.1|	B2_DAUCA, RecName: Full=B2 protein;	A0A068V8A2_COFCA, SubName: Full=Uncharacterized protein {ECO:0000313|EMBL:CDP16694.1};
TRINITY_DN108281_c1_g2	3846.3	22226.8	-2.53	5.41e-157	2.05e-154	down	GO:0005576,extracellular region; GO:0009505,plant-type cell wall; GO:0052793,pectin acetylesterase activity; GO:0071555,cell wall organization	K19882: NOTUM; O-palmitoleoyl-L-serine hydrolase [EC:3.1.1.98]	At5g45280	ref|XP_022029109.1|	PAE8_ARATH, RecName: Full=Pectin acetylesterase 8 {ECO:0000303|PubMed:25115560}; EC=3.1.1.- {ECO:0000305}; Flags: Precursor;	A0A251VA39_HELAN, RecName: Full=Pectin acetylesterase {ECO:0000256|RuleBase:RU363114}; EC=3.1.1.- {ECO:0000256|RuleBase:RU363114};
TRINITY_DN108217_c3_g3	1185	86.1777	3.78	7.26e-157	2.73e-154	up	GO:0004190,aspartic-type endopeptidase activity; GO:0004519,endonuclease activity; GO:0003676,nucleic acid binding; GO:0003964,RNA-directed DNA polymerase activity; GO:0008270,zinc ion binding; GO:0015074,DNA integration	K03006: RPB1, POLR2A; DNA-directed RNA polymerase II subunit RPB1 [EC:2.7.7.6]	At3g59720	gb|KYP66486.1|	POLX_TOBAC, RecName: Full=Retrovirus-related Pol polyprotein from transposon TNT 1-94; Includes: RecName: Full=Protease; EC=3.4.23.-; Includes: RecName: Full=Reverse transcriptase; EC=2.7.7.49; Includes: RecName: Full=Endonuclease;	A0A151THM1_CAJCA, SubName: Full=Retrovirus-related Pol polyprotein from transposon TNT 1-94 {ECO:0000313|EMBL:KYP66486.1};
TRINITY_DN96444_c1_g3	221083	66.992	11.69	1.57e-155	5.83e-153	up	--	--	--	--	--	--
TRINITY_DN104156_c1_g2	4.81084	4788.8	-9.96	5.76e-155	2.12e-152	down	GO:0005618,cell wall; GO:0005576,extracellular region; GO:0004650,polygalacturonase activity; GO:0005975,carbohydrate metabolic process; GO:0071555,cell wall organization	K01213: E3.2.1.67; galacturan 1,4-alpha-galacturonidase [EC:3.2.1.67]	At3g14040	gb|KVI10636.1|	PGLR_GOSHI, RecName: Full=Polygalacturonase; Short=PG; EC=3.2.1.15; AltName: Full=Pectinase; Flags: Precursor;	A0A124SHU5_CYNCS, SubName: Full=Glycoside hydrolase, family 28 {ECO:0000313|EMBL:KVI10636.1}; Flags: Fragment;
TRINITY_DN107432_c7_g1	10980.1	1029.32	3.41	1.28e-154	4.7e-152	up	--	--	--	--	--	--
TRINITY_DN98012_c3_g2	123.277	840.257	-2.77	2.19e-154	7.95e-152	down	--	--	--	--	--	--
TRINITY_DN107388_c1_g1	8994.57	1423.9	2.66	2.32e-154	8.35e-152	up	GO:0016021,integral component of membrane; GO:0005355,glucose transmembrane transporter activity; GO:0005351,carbohydrate:proton symporter activity; GO:0046323,glucose import; GO:0035428,NA	--	At5g18840	gb|PLY77813.1|	EDL16_ARATH, RecName: Full=Sugar transporter ERD6-like 16;	A0A251UH35_HELAN, SubName: Full=Putative major facilitator superfamily protein {ECO:0000313|EMBL:OTG22680.1};
TRINITY_DN102019_c2_g7	737.117	3940.67	-2.42	2.58e-153	9.24e-151	down	--	--	--	gb|PLY76321.1|	--	--
TRINITY_DN107861_c1_g1	3993.1	447.427	3.16	6.11e-152	2.16e-149	up	--	--	--	--	--	--
TRINITY_DN104313_c3_g1	1881.89	122.287	3.94	6.84e-152	2.4e-149	up	--	--	--	--	--	--
TRINITY_DN96649_c0_g3	33.7622	714.526	-4.41	1.37e-151	4.77e-149	down	GO:0005886,plasma membrane; GO:0009860,pollen tube growth; GO:0031347,regulation of defense response	--	At3g27960	gb|KVI09184.1|	KLCR2_ARATH, RecName: Full=Protein KINESIN LIGHT CHAIN-RELATED 2 {ECO:0000303|PubMed:23204523}; AltName: Full=Kinesin light chain-like protein 1 {ECO:0000303|Ref.1}; Short=AtKLC1 {ECO:0000303|Ref.1};	A0A103YHH0_CYNCS, SubName: Full=Uncharacterized protein {ECO:0000313|EMBL:KVI09184.1};
TRINITY_DN102306_c0_g3	1325.06	133.851	3.3	6.68e-151	2.31e-148	up	GO:0016021,integral component of membrane; GO:0005886,plasma membrane; GO:0005524,ATP binding; GO:0004674,protein serine/threonine kinase activity	K04733: IRAK4; interleukin-1 receptor-associated kinase 4 [EC:2.7.11.1]	At1g56120	gb|KVI08658.1|	Y5614_ARATH, RecName: Full=Probable LRR receptor-like serine/threonine-protein kinase At1g56140; EC=2.7.11.1; Flags: Precursor;	A0A124SH74_CYNCS, SubName: Full=Uncharacterized protein {ECO:0000313|EMBL:KVI08658.1};
TRINITY_DN104033_c1_g2	78.2194	10695.5	-7.09	2.2e-150	7.56e-148	down	--	--	At2g15220	gb|KVI01893.1|	--	A0A118K0U4_CYNCS, SubName: Full=Uncharacterized protein family, basic secretory protein {ECO:0000313|EMBL:KVI01893.1};
TRINITY_DN106399_c0_g2	520.887	1898.91	-1.86	2.39e-150	8.14e-148	down	GO:0051213,dioxygenase activity; GO:0046872,metal ion binding; GO:0009852,auxin catabolic process	K04124: E1.14.11.15; gibberellin 3beta-dioxygenase [EC:1.14.11.15]	At1g14130	gb|AHY99671.1|	DAO_ORYSJ, RecName: Full=2-oxoglutarate-dependent dioxygenase DAO; EC=1.14.11.-; AltName: Full=Protein DIOXYGENASE FOR AUXIN OXIDATION;	A0A1B0NTU3_CARTI, SubName: Full=Flavanone 3-hydroxylase {ECO:0000313|EMBL:AHY99671.1};
TRINITY_DN104754_c0_g2	51.8906	2760.04	-5.73	1.73e-149	5.86e-147	down	GO:0005794,Golgi apparatus; GO:0000139,Golgi membrane; GO:0016021,integral component of membrane; GO:0005886,plasma membrane; GO:0016760,cellulose synthase (UDP-forming) activity; GO:0016759,cellulose synthase activity; GO:0071555,cell wall organization; GO:0030244,cellulose biosynthetic process; GO:0009833,plant-type primary cell wall biogenesis	--	At4g24000	gb|PLY64477.1|	CSLG1_ARATH, RecName: Full=Cellulose synthase-like protein G1; Short=AtCslG1; EC=2.4.1.-;	A0A251RL43_HELAN, SubName: Full=Putative cellulose synthase, nucleotide-diphospho-sugar transferase {ECO:0000313|EMBL:OTF84982.1};
TRINITY_DN107314_c0_g3	63709.2	17730.9	1.85	2.69e-149	9.06e-147	up	--	--	--	--	--	--
TRINITY_DN105409_c1_g1	5513.56	474.718	3.54	2.37e-146	7.94e-144	up	GO:0005789,endoplasmic reticulum membrane; GO:0016021,integral component of membrane; GO:0010329,auxin efflux transmembrane transporter activity; GO:0010252,auxin homeostasis; GO:0009734,auxin-activated signaling pathway; GO:0010311,lateral root formation; GO:0040009,regulation of growth rate; GO:0009733,response to auxin	--	At2g17500	ref|XP_022009852.1|	PILS5_ARATH, RecName: Full=Protein PIN-LIKES 5 {ECO:0000303|PubMed:22504182}; AltName: Full=Auxin efflux carrier-like protein 5 {ECO:0000303|PubMed:22504182};	A0A251SHA2_HELAN, SubName: Full=Putative auxin efflux carrier {ECO:0000313|EMBL:OTF98207.1};
TRINITY_DN99122_c2_g4	7411.7	26.0473	8.15	2.35e-145	7.82e-143	up	--	--	--	gb|KVH88962.1|	--	A0A118JT03_CYNCS, SubName: Full=Uncharacterized protein {ECO:0000313|EMBL:KVH88962.1};
TRINITY_DN99504_c0_g4	4320.61	230.385	4.23	2.7e-145	8.93e-143	up	GO:0009570,chloroplast stroma; GO:0009534,chloroplast thylakoid; GO:0016165,linoleate 13S-lipoxygenase activity; GO:0046872,metal ion binding; GO:0010597,green leaf volatile biosynthetic process; GO:0031408,oxylipin biosynthetic process	K00454: LOX2S; lipoxygenase [EC:1.13.11.12]	At3g45140	gb|KVH90897.1|	LOX21_SOLTU, RecName: Full=Linoleate 13S-lipoxygenase 2-1, chloroplastic; EC=1.13.11.12; AltName: Full=Lipoxygenase 2-1; Flags: Precursor;	A0A118JUA2_CYNCS, RecName: Full=Lipoxygenase {ECO:0000256|RuleBase:RU003975}; EC=1.13.11.- {ECO:0000256|RuleBase:RU003975}; Flags: Fragment;
TRINITY_DN98679_c1_g2	139.132	944.578	-2.76	3.61e-145	1.19e-142	down	--	--	Hs7705566	--	--	--
TRINITY_DN106081_c4_g1	195.721	2707.14	-3.79	6.86e-145	2.24e-142	down	--	--	At1g08790	gb|KVI00722.1|	--	A0A118K016_CYNCS, SubName: Full=Uncharacterized protein {ECO:0000313|EMBL:KVI00722.1};
TRINITY_DN105984_c1_g2	3890.48	63.5317	5.93	1.22e-144	3.96e-142	up	GO:0008061,chitin binding; GO:0004568,chitinase activity; GO:0016998,cell wall macromolecule catabolic process; GO:0006032,chitin catabolic process; GO:0006952,defense response; GO:0000272,polysaccharide catabolic process	K20547: CHIB; basic endochitinase B [EC:3.2.1.14]	At3g12500	gb|PLY73724.1|	CHIX_PEA, RecName: Full=Endochitinase; EC=3.2.1.14; Flags: Precursor;	A0A103XK43_CYNCS, SubName: Full=Chitin-binding, type 1 {ECO:0000313|EMBL:KVH92153.1};
TRINITY_DN98438_c1_g1	232.191	2650.84	-3.51	2.2e-144	7.07e-142	down	GO:0016021,integral component of membrane; GO:0016491,oxidoreductase activity; GO:0006694,steroid biosynthetic process	--	At3g55310	ref|XP_022022388.1|	HSD2_ARATH, RecName: Full=11-beta-hydroxysteroid dehydrogenase-like 2; EC=1.1.1.-; AltName: Full=17-beta-hydroxysteroid dehydrogenase-like 2; EC=1.1.1.-; AltName: Full=Hydroxysteroid dehydrogenase 2; Short=AtHSD2;	A0A251VGK0_HELAN, SubName: Full=Putative glucose/ribitol dehydrogenase {ECO:0000313|EMBL:OTG34725.1};
TRINITY_DN96849_c1_g1	6238.28	138.073	5.5	3.71e-144	1.19e-141	up	--	--	--	--	--	--
TRINITY_DN106927_c0_g1	166.517	1206.18	-2.85	2.92e-143	9.29e-141	down	GO:0055028,cortical microtubule; GO:0005737,cytoplasm; GO:0005524,ATP binding; GO:0008017,microtubule binding; GO:0003777,microtubule motor activity; GO:0071555,cell wall organization; GO:0007018,microtubule-based movement	--	At5g47820	gb|KVI06712.1|	KN4A_GOSHI, RecName: Full=Kinesin-like protein KIN-4A {ECO:0000305}; AltName: Full=GhKINESIN-4A {ECO:0000303|PubMed:25600279};	A0A103YCT0_CYNCS, SubName: Full=Uncharacterized protein {ECO:0000313|EMBL:KVI06712.1};
TRINITY_DN106249_c0_g2	6145.23	417.397	3.88	3.39e-143	1.07e-140	up	GO:0047274,galactinol-sucrose galactosyltransferase activity; GO:0005975,carbohydrate metabolic process	K06617: E2.4.1.82; raffinose synthase [EC:2.4.1.82]	At5g20250	gb|KVH93790.1|	RFS6_ARATH, RecName: Full=Probable galactinol--sucrose galactosyltransferase 6; EC=2.4.1.82; AltName: Full=Protein DARK INDUCIBLE 10; AltName: Full=Raffinose synthase 6;	A0A118JW99_CYNCS, SubName: Full=Aldolase-type TIM barrel {ECO:0000313|EMBL:KVH93790.1};
TRINITY_DN104718_c4_g7	133.275	852.93	-2.68	1.1e-140	3.46e-138	down	GO:0005634,nucleus; GO:0061630,ubiquitin protein ligase activity; GO:0008270,zinc ion binding; GO:0007275,multicellular organism development; GO:0006511,ubiquitin-dependent protein catabolic process	K04506: SIAH1; E3 ubiquitin-protein ligase SIAH1 [EC:2.3.2.27]	At3g61790	ref|XP_021969687.1|	SINA3_ARATH, RecName: Full=E3 ubiquitin-protein ligase SINAT3 {ECO:0000305}; EC=2.3.2.27 {ECO:0000250|UniProtKB:Q8S3N1}; AltName: Full=RING-type E3 ubiquitin transferase SINAT3 {ECO:0000305}; AltName: Full=Seven in absentia homolog 3 {ECO:0000305};	A0A251UGZ0_HELAN, RecName: Full=E3 ubiquitin-protein ligase {ECO:0000256|RuleBase:RU201113}; EC=2.3.2.27 {ECO:0000256|RuleBase:RU201113};
TRINITY_DN104459_c1_g2	21.3117	783.691	-5.19	1.82e-140	5.68e-138	down	GO:0005783,endoplasmic reticulum; GO:0005768,endosome; GO:0016459,myosin complex; GO:0009524,phragmoplast; GO:0009506,plasmodesma; GO:0003779,actin binding; GO:0005524,ATP binding; GO:0005516,calmodulin binding; GO:0003774,motor activity; GO:0006897,endocytosis	--	At3g19960	gb|KVI05268.1|	MYO1_ARATH, RecName: Full=Myosin-1; AltName: Full=AtATM1;	A0A118K319_CYNCS, SubName: Full=IQ motif, EF-hand binding site-containing protein {ECO:0000313|EMBL:KVI05268.1};
TRINITY_DN105832_c7_g1	61.8088	812.052	-3.71	3.82e-140	1.18e-137	down	GO:0005783,endoplasmic reticulum; GO:0005768,endosome; GO:0016459,myosin complex; GO:0009524,phragmoplast; GO:0009506,plasmodesma; GO:0003779,actin binding; GO:0005524,ATP binding; GO:0005516,calmodulin binding; GO:0003774,motor activity; GO:0006897,endocytosis	--	At3g19960	gb|PLY83767.1|	MYO1_ARATH, RecName: Full=Myosin-1; AltName: Full=AtATM1;	A0A251S2Q2_HELAN, SubName: Full=Putative myosin 1 {ECO:0000313|EMBL:OTF92819.1};
TRINITY_DN108003_c1_g2	1883.48	558.145	1.76	1.54e-139	4.75e-137	up	GO:0016021,integral component of membrane; GO:0005886,plasma membrane; GO:0005524,ATP binding; GO:0042626,ATPase activity, coupled to transmembrane movement of substances; GO:0009414,response to water deprivation; GO:0010148,transpiration	K05681: ABCG2, CD338; ATP-binding cassette, subfamily G (WHITE), member 2	At5g06530	gb|PLY82225.1|	AB22G_ARATH, RecName: Full=ABC transporter G family member 22; Short=ABC transporter ABCG.22; Short=AtABCG22; AltName: Full=White-brown complex homolog protein 23; Short=AtWBC23;	A0A251VRS4_HELAN, SubName: Full=Putative pigment permease, P-loop containing nucleoside triphosphate hydrolase {ECO:0000313|EMBL:OTG38114.1};
TRINITY_DN107015_c1_g4	5952.77	945.24	2.65	7.73e-138	2.37e-135	up	--	--	--	--	--	--
TRINITY_DN108179_c5_g1	1052.54	8258.18	-2.97	7.96e-138	2.43e-135	down	--	--	--	--	--	--
TRINITY_DN93201_c0_g2	32.3466	657.552	-4.34	1.05e-137	3.17e-135	down	GO:0005794,Golgi apparatus; GO:0016021,integral component of membrane; GO:0031902,late endosome membrane; GO:0031201,SNARE complex; GO:0005774,vacuolar membrane; GO:0005773,vacuole; GO:0005484,SNAP receptor activity; GO:0000149,SNARE binding; GO:0006887,exocytosis; GO:0015031,protein transport; GO:0009651,response to salt stress; GO:0006906,vesicle fusion	K08515: VAMP7; vesicle-associated membrane protein 7	At5g11150	ref|XP_016574920.1|	VA713_ARATH, RecName: Full=Vesicle-associated membrane protein 713 {ECO:0000303|PubMed:11115874}; Short=AtVAMP713 {ECO:0000303|PubMed:11115874};	A0A2G2WL80_CAPBA, SubName: Full=Vesicle-associated membrane protein {ECO:0000313|EMBL:PHT45994.1};
TRINITY_DN99464_c0_g2	131.062	2309.87	-4.14	4.44e-137	1.34e-134	down	GO:0003677,DNA binding; GO:0008270,zinc ion binding	--	At2g36320	gb|KVI07414.1|	SAP4_ARATH, RecName: Full=Zinc finger A20 and AN1 domain-containing stress-associated protein 4; Short=AtSAP4;	A0A103YE46_CYNCS, SubName: Full=Zinc finger, A20-type {ECO:0000313|EMBL:KVI07414.1}; Flags: Fragment;
TRINITY_DN106271_c5_g1	612.266	3616.28	-2.56	4.47e-137	1.34e-134	down	GO:0005634,nucleus; GO:0003700,DNA binding transcription factor activity; GO:0000976,transcription regulatory region sequence-specific DNA binding; GO:0008270,zinc ion binding; GO:0010252,auxin homeostasis; GO:0048527,lateral root development; GO:0048366,leaf development; GO:0010150,leaf senescence; GO:2000469,negative regulation of peroxidase activity; GO:0000122,negative regulation of transcrip…	--	At1g70000	ref|XP_022025761.1|	KUA1_ARATH, RecName: Full=Transcription factor KUA1 {ECO:0000303|PubMed:24806884}; AltName: Full=Myb-related protein H {ECO:0000303|PubMed:23888064}; Short=AtMYBH {ECO:0000303|PubMed:23888064}; Short=AtMYBS3 {ECO:0000303|PubMed:25920996}; Short=MYBS3-homolg protein {ECO:0000303|PubMed:25920996}; AltName: Full=Protein KUODA1 {ECO:0000303|PubMed:24806884};	A0A251RUR3_HELAN, SubName: Full=Putative myb domain, plant, Homeodomain-like protein {ECO:0000313|EMBL:OTF88198.1};
TRINITY_DN103325_c0_g7	848.009	87.9172	3.27	7.15e-136	2.13e-133	up	--	--	At1g28190	gb|PLY76334.1|	--	A0A251RUK2_HELAN, SubName: Full=Uncharacterized protein {ECO:0000313|EMBL:OTF88046.1};
TRINITY_DN98532_c2_g1	393.807	1653.14	-2.07	1.08e-135	3.21e-133	down	GO:0000139,Golgi membrane; GO:0016021,integral component of membrane; GO:0016757,transferase activity, transferring glycosyl groups; GO:0042546,cell wall biogenesis; GO:0071555,cell wall organization	--	At4g20170	gb|KVI11074.1|	GALS3_ARATH, RecName: Full=Galactan beta-1,4-galactosyltransferase GALS3 {ECO:0000305}; EC=2.4.1.- {ECO:0000305}; AltName: Full=Beta-1,4-galactan synthase; AltName: Full=Galactan synthase 3 {ECO:0000303|PubMed:23243126};	A0A103YL06_CYNCS, SubName: Full=Uncharacterized protein {ECO:0000313|EMBL:KVI11074.1};
TRINITY_DN102672_c1_g2	279.758	1375.73	-2.3	1.25e-135	3.67e-133	down	--	K08770: UBC; ubiquitin C	At5g25270	gb|KVH99813.1|	--	A0A103XZL9_CYNCS, SubName: Full=Ubiquitin {ECO:0000313|EMBL:KVH99813.1}; Flags: Fragment;
TRINITY_DN107999_c5_g2	4900.17	720.769	2.77	5.24e-135	1.53e-132	up	--	--	At1g80160	gb|KVI06030.1|	--	A0A118K3J3_CYNCS, SubName: Full=Glyoxalase/fosfomycin resistance/dioxygenase domain-containing protein {ECO:0000313|EMBL:KVI06030.1};
TRINITY_DN107588_c4_g1	161.723	1126.7	-2.8	2.78e-134	8.06e-132	down	--	--	--	gb|KVI06481.1|	--	A0A118K3T4_CYNCS, SubName: Full=Uncharacterized protein {ECO:0000313|EMBL:KVI06481.1};
TRINITY_DN104834_c1_g1	966.214	101.455	3.25	2.79e-134	8.06e-132	up	GO:0005737,cytoplasm; GO:0047458,beta-pyrazolylalanine synthase activity; GO:0004124,cysteine synthase activity; GO:0050461,L-mimosine synthase activity; GO:0050234,pyrazolylalanine synthase activity; GO:0006535,cysteine biosynthetic process from serine	K01738: cysK; cysteine synthase [EC:2.5.1.47]	At3g22460	gb|KVI06523.1|	CYSK_CITLA, RecName: Full=Cysteine synthase {ECO:0000303|PubMed:8280125}; Short=CSase; EC=2.5.1.47 {ECO:0000269|PubMed:8280125, ECO:0000269|PubMed:9013806}; AltName: Full=Beta-PA/CSase; EC=2.5.1.51 {ECO:0000269|PubMed:8280125, ECO:0000269|PubMed:9013806}; AltName: Full=Beta-pyrazolylalanine synthase {ECO:0000303|PubMed:8280125}; EC=4.2.1.50 {ECO:0000269|PubMed:8280125, ECO:0000269|PubMed:9013806}…	A0A118K3V3_CYNCS, RecName: Full=Cysteine synthase {ECO:0000256|RuleBase:RU003985}; EC=2.5.1.47 {ECO:0000256|RuleBase:RU003985};
TRINITY_DN92790_c0_g1	14.2218	814.182	-5.82	7.01e-134	2.02e-131	down	GO:0031969,chloroplast membrane; GO:0005789,endoplasmic reticulum membrane; GO:0016021,integral component of membrane; GO:0009579,thylakoid; GO:0016717,oxidoreductase activity, acting on paired donors, with oxidation of a pair of donors resulting in the reduction of molecular oxygen to two molecules of water; GO:0031408,oxylipin biosynthetic process; GO:0010205,photoinhibition; GO:0006636,unsatur…	--	At3g15850	ref|XP_022010496.1|	ADS3_ARATH, RecName: Full=Palmitoyl-monogalactosyldiacylglycerol delta-7 desaturase, chloroplastic {ECO:0000303|PubMed:15579662}; EC=1.14.19.42 {ECO:0000269|PubMed:15579662}; AltName: Full=Acyl-lipid desaturase 3 {ECO:0000303|PubMed:15240892}; AltName: Full=Fatty acid desaturase 5 {ECO:0000303|PubMed:15579662}; Short=FAD5 {ECO:0000303|PubMed:15579662}; AltName: Full=Fatty acid desaturase B {ECO:0…	A0A251VDG4_HELAN, SubName: Full=Putative fatty acid desaturase family protein {ECO:0000313|EMBL:OTG33309.1};
TRINITY_DN100459_c1_g1	290.639	1101.47	-1.92	1.43e-133	4.08e-131	down	--	--	--	--	--	--
TRINITY_DN106559_c2_g1	30.8937	812.643	-4.71	2.9e-133	8.23e-131	down	GO:0005634,nucleus; GO:0003700,DNA binding transcription factor activity; GO:0046983,protein dimerization activity; GO:0000977,RNA polymerase II regulatory region sequence-specific DNA binding; GO:0000900,translation repressor activity, mRNA regulatory element binding; GO:0048438,floral whorl development; GO:0009910,negative regulation of flower development; GO:0045892,negative regulation of tran…	K09260: MEF2A; MADS-box transcription enhancer factor 2A	At2g22540	gb|KVI08667.1|	JOIN_SOLLC, RecName: Full=MADS-box protein JOINTLESS; AltName: Full=LeMADS;	A0A103YGI0_CYNCS, SubName: Full=Uncharacterized protein {ECO:0000313|EMBL:KVI08667.1};
TRINITY_DN107388_c1_g3	3121.93	598.1	2.38	6.43e-133	1.82e-130	up	GO:0016021,integral component of membrane; GO:0005355,glucose transmembrane transporter activity; GO:0005351,carbohydrate:proton symporter activity; GO:0046323,glucose import; GO:0035428,NA	--	At5g18840	gb|PLY77813.1|	EDL16_ARATH, RecName: Full=Sugar transporter ERD6-like 16;	A0A251UH35_HELAN, SubName: Full=Putative major facilitator superfamily protein {ECO:0000313|EMBL:OTG22680.1};
TRINITY_DN98798_c1_g4	32.0782	4620.78	-7.17	3.24e-132	9.1e-130	down	GO:0008168,methyltransferase activity; GO:0006479,protein methylation	--	At4g16570	ref|XP_022021556.1|	ANM7_ORYSI, RecName: Full=Protein arginine N-methyltransferase 7; EC=2.1.1.-;	A0A251RR78_HELAN, RecName: Full=Protein arginine N-methyltransferase {ECO:0000256|PIRNR:PIRNR036946};
TRINITY_DN104459_c0_g1	100.346	1004.01	-3.32	3.54e-131	9.9e-129	down	GO:0005783,endoplasmic reticulum; GO:0005768,endosome; GO:0016459,myosin complex; GO:0009524,phragmoplast; GO:0009506,plasmodesma; GO:0003779,actin binding; GO:0005524,ATP binding; GO:0005516,calmodulin binding; GO:0003774,motor activity; GO:0006897,endocytosis	--	At3g19960	gb|KVI05268.1|	MYO1_ARATH, RecName: Full=Myosin-1; AltName: Full=AtATM1;	A0A118K319_CYNCS, SubName: Full=IQ motif, EF-hand binding site-containing protein {ECO:0000313|EMBL:KVI05268.1};
TRINITY_DN106462_c2_g1	1386.33	217.682	2.67	1.21e-130	3.37e-128	up	GO:0016021,integral component of membrane; GO:0005886,plasma membrane; GO:0009506,plasmodesma; GO:0005524,ATP binding; GO:0004674,protein serine/threonine kinase activity; GO:0046777,protein autophosphorylation; GO:0010193,response to ozone	K04733: IRAK4; interleukin-1 receptor-associated kinase 4 [EC:2.7.11.1]	At1g70520	gb|PLY73931.1|	CRK2_ARATH, RecName: Full=Cysteine-rich receptor-like protein kinase 2; Short=Cysteine-rich RLK2; EC=2.7.11.-; Flags: Precursor;	A0A103XRI8_CYNCS, SubName: Full=Gnk2-homologous domain-containing protein {ECO:0000313|EMBL:KVH95550.1};
TRINITY_DN96572_c5_g1	78.6149	986.995	-3.65	2.52e-130	6.98e-128	down	GO:0005634,nucleus; GO:0005886,plasma membrane; GO:0005524,ATP binding; GO:0004693,cyclin-dependent protein serine/threonine kinase activity; GO:0042742,defense response to bacterium; GO:0002229,defense response to oomycetes; GO:1900426,positive regulation of defense response to bacterium; GO:1902290,positive regulation of defense response to oomycetes; GO:0006468,protein phosphorylation; GO:2000…	--	At1g74330	ref|XP_022011319.1|	IBS1_ARATH, RecName: Full=Protein IMPAIRED IN BABA-INDUCED STERILITY 1 {ECO:0000303|PubMed:15722464}; EC=2.7.11.- {ECO:0000255|PROSITE-ProRule:PRU00159};	A0A118K5I3_CYNCS, SubName: Full=Protein kinase, ATP binding site-containing protein {ECO:0000313|EMBL:KVI09105.1};
TRINITY_DN102817_c2_g4	377.299	2310.24	-2.61	4.88e-130	1.34e-127	down	GO:0005829,cytosol; GO:0005634,nucleus; GO:0005886,plasma membrane; GO:0009536,plastid; GO:0003700,DNA binding transcription factor activity; GO:0035091,phosphatidylinositol binding; GO:0006355,regulation of transcription, DNA-templated; GO:0009620,response to fungus	--	At2g18280	gb|KVI02847.1|	TLP2_ARATH, RecName: Full=Tubby-like F-box protein 2; Short=AtTLP2;	A0A103Y5F4_CYNCS, RecName: Full=Tubby-like F-box protein {ECO:0000256|RuleBase:RU361125};
TRINITY_DN97275_c0_g4	1716.45	103.039	4.06	5.99e-130	1.64e-127	up	GO:0020037,heme binding; GO:0047987,hydroperoxide dehydratase activity; GO:0005506,iron ion binding; GO:0004497,monooxygenase activity; GO:0016705,oxidoreductase activity, acting on paired donors, with incorporation or reduction of molecular oxygen; GO:0031408,oxylipin biosynthetic process	K01723: AOS; hydroperoxide dehydratase [EC:4.2.1.92]	At5g42650	sp|Q40778.2|	C74A2_PARAR, RecName: Full=Allene oxide synthase; EC=4.2.1.92; AltName: Full=Cytochrome P450 74A2; AltName: Full=Rubber particle protein; Short=RPP;	A0A251TZF3_HELAN, SubName: Full=Putative allene oxide synthase {ECO:0000313|EMBL:OTG16159.1};
TRINITY_DN106095_c2_g3	4519.04	297.244	3.93	7.63e-130	2.08e-127	up	GO:0016021,integral component of membrane; GO:0005743,mitochondrial inner membrane; GO:0070469,respiratory chain; GO:0009916,alternative oxidase activity; GO:0046872,metal ion binding; GO:0102721,ubiquinol:oxygen oxidoreductase activity	--	At1g32350	gb|KVH91480.1|	AOX3_ARATH, RecName: Full=Ubiquinol oxidase 3, mitochondrial; EC=1.10.3.11; AltName: Full=Alternative oxidase 3; Flags: Precursor;	A0A124SBR7_CYNCS, RecName: Full=Ubiquinol oxidase {ECO:0000256|RuleBase:RU003779}; EC=1.10.3.11 {ECO:0000256|RuleBase:RU003779};
TRINITY_DN96363_c3_g4	474.731	1553.68	-1.71	3.31e-129	8.98e-127	down	GO:0005634,nucleus; GO:0003700,DNA binding transcription factor activity; GO:0043565,sequence-specific DNA binding; GO:0009737,response to abscisic acid; GO:1902074,response to salt; GO:0009651,response to salt stress; GO:0006351,transcription, DNA-templated	--	At5g49620	gb|KVH89684.1|	MYB78_ARATH, RecName: Full=Transcription factor MYB78 {ECO:0000303|PubMed:9839469}; AltName: Full=Myb-related protein 78 {ECO:0000303|PubMed:9839469}; Short=AtMYB78 {ECO:0000303|PubMed:9839469};	A0A103XFF7_CYNCS, SubName: Full=Homeodomain-like protein {ECO:0000313|EMBL:KVH89684.1};
TRINITY_DN106270_c0_g3	1303.63	24654.8	-4.24	5.8e-129	1.56e-126	down	GO:0005737,cytoplasm; GO:0005874,microtubule; GO:0005525,GTP binding; GO:0003924,GTPase activity; GO:0005200,structural constituent of cytoskeleton; GO:0007017,microtubule-based process	K07374: TUBA; tubulin alpha	CE09434	gb|PLY90546.1|	TBA6_MAIZE, RecName: Full=Tubulin alpha-6 chain; AltName: Full=Alpha-6-tubulin;	A0A118JTX5_CYNCS, RecName: Full=Tubulin alpha chain {ECO:0000256|RuleBase:RU000352};
TRINITY_DN99971_c8_g1	119.289	759.847	-2.67	1.51e-128	4.05e-126	down	--	--	At2g03630	gb|PLY79579.1|	--	A0A251UDT5_HELAN, SubName: Full=Uncharacterized protein {ECO:0000313|EMBL:OTG21036.1};
TRINITY_DN107255_c0_g2	1272.76	12386.6	-3.28	1.57e-128	4.18e-126	down	--	--	--	--	--	--
TRINITY_DN102711_c1_g1	1394.44	6245.14	-2.16	2.55e-128	6.76e-126	down	GO:0003677,DNA binding; GO:0046872,metal ion binding	--	At2g41900	gb|KVI00692.1|	C3H24_ORYSJ, RecName: Full=Zinc finger CCCH domain-containing protein 24; Short=OsC3H24;	A0A124SEP2_CYNCS, SubName: Full=Uncharacterized protein {ECO:0000313|EMBL:KVI00692.1};
TRINITY_DN104434_c1_g1	14.4745	854.838	-5.89	6.49e-128	1.71e-125	down	GO:0005887,integral component of plasma membrane; GO:0016020,membrane; GO:0035673,oligopeptide transmembrane transporter activity; GO:0015031,protein transport	--	At4g26590	gb|PLY70373.1|	OPT5_ARATH, RecName: Full=Oligopeptide transporter 5; Short=AtOPT5;	A0A251RSB6_HELAN, SubName: Full=Putative oligopeptide transporter, OPT superfamily {ECO:0000313|EMBL:OTF87111.1};
TRINITY_DN107680_c0_g6	14309.2	1777.78	3.01	7.11e-128	1.87e-125	up	--	--	--	--	--	--
TRINITY_DN102936_c2_g1	317.956	1852.61	-2.54	8.42e-128	2.2e-125	down	--	--	--	--	--	--
TRINITY_DN107144_c1_g4	3026.18	25.3751	6.9	2.2e-127	5.72e-125	up	GO:0004190,aspartic-type endopeptidase activity; GO:0042802,identical protein binding; GO:0045735,nutrient reservoir activity; GO:0030163,protein catabolic process; GO:0006508,proteolysis	--	At1g03220	gb|KVI01654.1|	7SB1_SOYBN, RecName: Full=Basic 7S globulin; AltName: Full=SBg7S; Short=Bg; Contains: RecName: Full=Basic 7S globulin high kDa subunit; Contains: RecName: Full=Basic 7S globulin low kDa subunit; Flags: Precursor;	A0A103Y355_CYNCS, SubName: Full=Aspartic peptidase {ECO:0000313|EMBL:KVI01654.1};
TRINITY_DN106865_c2_g7	1728.71	6627.27	-1.94	4.28e-127	1.11e-124	down	GO:0047763,caffeate O-methyltransferase activity; GO:0046983,protein dimerization activity; GO:0009809,lignin biosynthetic process	K13066: E2.1.1.68, COMT; caffeic acid 3-O-methyltransferase [EC:2.1.1.68]	At5g54160	dbj|BAG71895.1|	COMT1_COFCA, RecName: Full=Caffeic acid 3-O-methyltransferase; Short=CAOMT; Short=COMT; EC=2.1.1.68; AltName: Full=S-adenosysl-L-methionine:caffeic acid 3-O-methyltransferase;	B6F0V0_CARTI, SubName: Full=5-hydroxyconiferaldehyde O-methyltransferase {ECO:0000313|EMBL:BAG71895.1};
TRINITY_DN98516_c8_g1	54.3598	616.021	-3.51	6.28e-125	1.62e-122	down	GO:0009507,chloroplast; GO:0009570,chloroplast stroma; GO:0005524,ATP binding; GO:0016301,kinase activity; GO:0000287,magnesium ion binding; GO:0030955,potassium ion binding; GO:0004743,pyruvate kinase activity; GO:0006629,lipid metabolic process; GO:0046686,response to cadmium ion; GO:0010431,seed maturation	K00873: PK, pyk; pyruvate kinase [EC:2.7.1.40]	At3g22960	gb|KVI10854.1|	PKP1_ARATH, RecName: Full=Plastidial pyruvate kinase 1, chloroplastic; Short=PK1; Short=PKp1; EC=2.7.1.40; AltName: Full=Pyruvate kinase II; AltName: Full=Pyruvate kinase isozyme A; Short=PKP-ALPHA; Flags: Precursor;	A0A103YKP3_CYNCS, RecName: Full=Pyruvate kinase {ECO:0000256|RuleBase:RU000504}; EC=2.7.1.40 {ECO:0000256|RuleBase:RU000504};
TRINITY_DN99409_c1_g1	2158.26	13420.3	-2.64	7.29e-125	1.87e-122	down	GO:0005789,endoplasmic reticulum membrane; GO:0000139,Golgi membrane; GO:0005886,plasma membrane; GO:0032588,trans-Golgi network membrane; GO:0005773,vacuole; GO:0005525,GTP binding; GO:0003924,GTPase activity; GO:0006888,ER to Golgi vesicle-mediated transport; GO:0015031,protein transport; GO:0046686,response to cadmium ion	--	At1g02130	ref|XP_022038092.1|	RAD2A_ARATH, RecName: Full=Ras-related protein RABD2a; Short=AtRABD2a; AltName: Full=Ras-related protein Ara-5; AltName: Full=Ras-related protein Rab1B; Short=AtRab1B;	A0A251UQL1_HELAN, SubName: Full=Putative small GTPase superfamily {ECO:0000313|EMBL:OTG25136.1};
TRINITY_DN101563_c1_g2	819.379	13485.5	-4.04	2.3e-124	5.85e-122	down	GO:0046872,metal ion binding	--	At1g10200	gb|PLY69757.1|	SF3_HELAN, RecName: Full=Pollen-specific protein SF3;	A0A103XM57_CYNCS, SubName: Full=Zinc finger, LIM-type {ECO:0000313|EMBL:KVH93351.1};
TRINITY_DN96106_c0_g2	749.144	121.217	2.63	2.59e-124	6.55e-122	up	--	--	--	gb|KVH87891.1|	--	A0A103XBX0_CYNCS, SubName: Full=Amino acid transporter, transmembrane {ECO:0000313|EMBL:KVH87891.1};
TRINITY_DN103558_c0_g1	3730.14	1355.04	1.46	4.06e-124	1.02e-121	up	GO:0009507,chloroplast; GO:0004089,carbonate dehydratase activity; GO:0008270,zinc ion binding; GO:0015976,carbon utilization	K01673: cynT, can; carbonic anhydrase [EC:4.2.1.1]	At1g58180	gb|KVI01859.1|	BCA5_ARATH, RecName: Full=Beta carbonic anhydrase 5, chloroplastic; Short=AtbCA5; Short=AtbetaCA5; EC=4.2.1.1; AltName: Full=Beta carbonate dehydratase 5; Flags: Precursor;	A0A103Y3H5_CYNCS, RecName: Full=Carbonic anhydrase {ECO:0000256|RuleBase:RU003956}; EC=4.2.1.1 {ECO:0000256|RuleBase:RU003956}; AltName: Full=Carbonate dehydratase {ECO:0000256|RuleBase:RU003956};
TRINITY_DN107680_c0_g5	6450.19	815.406	2.98	5.11e-124	1.28e-121	up	GO:0005829,cytosol; GO:0008732,L-allo-threonine aldolase activity; GO:0004793,threonine aldolase activity; GO:0006545,glycine biosynthetic process; GO:0006567,threonine catabolic process	K01620: ltaE; threonine aldolase [EC:4.1.2.48]	At1g08630	gb|KVI09587.1|	THA1_ARATH, RecName: Full=Probable low-specificity L-threonine aldolase 1; EC=4.1.2.48; AltName: Full=Threonine aldolase 1;	A0A118K5S9_CYNCS, SubName: Full=Aromatic amino acid beta-eliminating lyase/threonine aldolase {ECO:0000313|EMBL:KVI09587.1};
TRINITY_DN106449_c1_g2	58.6249	642.8	-3.45	2.32e-123	5.79e-121	down	GO:0005576,extracellular region; GO:0020037,heme binding; GO:0046872,metal ion binding; GO:0004601,peroxidase activity; GO:0042744,hydrogen peroxide catabolic process; GO:0006979,response to oxidative stress	K00430: E1.11.1.7; peroxidase [EC:1.11.1.7]	At1g14550	gb|KVH97467.1|	PERX_NICSY, RecName: Full=Lignin-forming anionic peroxidase; EC=1.11.1.7; Flags: Precursor;	A0A118JYA1_CYNCS, RecName: Full=Peroxidase {ECO:0000256|RuleBase:RU362060, ECO:0000256|SAAS:SAAS00709852}; EC=1.11.1.7 {ECO:0000256|RuleBase:RU362060, ECO:0000256|SAAS:SAAS00709852};
TRINITY_DN105411_c2_g3	3811.86	318.587	3.58	3.67e-123	9.13e-121	up	GO:0005789,endoplasmic reticulum membrane; GO:0016021,integral component of membrane; GO:0009734,auxin-activated signaling pathway; GO:0009733,response to auxin; GO:0055085,transmembrane transport	--	At5g65980	ref|XP_022009852.1|	PILS7_ARATH, RecName: Full=Protein PIN-LIKES 7 {ECO:0000303|PubMed:22504182}; AltName: Full=Auxin efflux carrier-like protein 7 {ECO:0000303|PubMed:22504182};	A0A251SHA2_HELAN, SubName: Full=Putative auxin efflux carrier {ECO:0000313|EMBL:OTF98207.1};
TRINITY_DN102893_c1_g1	37.3608	2230.22	-5.89	3.07e-122	7.6e-120	down	--	--	At5g35400	ref|XP_021989694.1|	--	A0A251TMR6_HELAN, RecName: Full=tRNA pseudouridine synthase {ECO:0000256|RuleBase:RU003792}; EC=5.4.99.- {ECO:0000256|RuleBase:RU003792};
TRINITY_DN105068_c0_g2	807.612	9315.7	-3.53	1.15e-120	2.83e-118	down	--	--	--	--	--	--
TRINITY_DN95706_c8_g1	20.4506	581.099	-4.82	1.62e-120	3.96e-118	down	GO:0016021,integral component of membrane; GO:0005886,plasma membrane; GO:0080054,low-affinity nitrate transmembrane transporter activity; GO:0015706,nitrate transport	--	At1g52190	gb|KVI11587.1|	PTR6_ARATH, RecName: Full=Protein NRT1/ PTR FAMILY 1.2; Short=AtNPF1.2; AltName: Full=Nitrate transporter 1.11;	A0A103YM77_CYNCS, SubName: Full=Major facilitator superfamily domain, general substrate transporter {ECO:0000313|EMBL:KVI11587.1};
TRINITY_DN102005_c0_g3	413.297	5159.32	-3.64	1.97e-120	4.8e-118	down	GO:0016021,integral component of membrane; GO:0016757,transferase activity, transferring glycosyl groups; GO:0006004,fucose metabolic process; GO:0006486,protein glycosylation	--	At5g65470	gb|PLY80396.1|	OFT39_ARATH, RecName: Full=O-fucosyltransferase 39 {ECO:0000305}; Short=O-FucT-39 {ECO:0000305}; EC=2.4.1.- {ECO:0000305}; AltName: Full=O-fucosyltransferase family protein {ECO:0000312|EMBL:ARJ31456.1};	A0A251SS90_HELAN, SubName: Full=Putative O-fucosyltransferase family protein {ECO:0000313|EMBL:OTG01717.1};
TRINITY_DN105149_c1_g2	1645.63	24796.3	-3.91	5.5e-120	1.33e-117	down	GO:0005737,cytoplasm; GO:0005856,cytoskeleton; GO:0051015,actin filament binding; GO:0046872,metal ion binding; GO:0051017,actin filament bundle assembly	--	At2g45800	ref|XP_011091917.1|	PLI2C_ARATH, RecName: Full=LIM domain-containing protein PLIM2c {ECO:0000305}; AltName: Full=Pollen-expressed LIM protein 2C {ECO:0000305};	A0A1U8EMQ2_CAPAN, SubName: Full=LIM domain-containing protein PLIM2b-like isoform X2 {ECO:0000313|RefSeq:XP_016544640.1};
TRINITY_DN105124_c1_g3	506.825	3409.74	-2.75	1.25e-119	3.02e-117	down	GO:0005737,cytoplasm; GO:0005829,cytosol; GO:0016747,transferase activity, transferring acyl groups other than amino-acyl groups; GO:0010143,cutin biosynthetic process; GO:0051179,localization; GO:0090626,plant epidermis morphogenesis; GO:0010090,trichome morphogenesis	--	At5g01210	gb|KVI03331.1|	DCR_ARATH, RecName: Full=BAHD acyltransferase DCR; EC=2.3.1.-; AltName: Full=Protein DEFECTIVE IN CUTICULAR RIDGES; AltName: Full=Protein PERMEABLE LEAVES 3;	A0A118K1V0_CYNCS, SubName: Full=Chloramphenicol acetyltransferase-like domain-containing protein {ECO:0000313|EMBL:KVI03331.1};
TRINITY_DN98896_c3_g9	723.412	33.995	4.42	1.44e-119	3.47e-117	up	GO:0005887,integral component of plasma membrane; GO:0008519,ammonium transmembrane transporter activity; GO:0072488,ammonium transmembrane transport; GO:0015696,ammonium transport; GO:0015695,organic cation transport	--	At4g13510	gb|KVH91029.1|	AMT11_SOLLC, RecName: Full=Ammonium transporter 1 member 1; AltName: Full=LeAMT1;1;	A0A118JTQ8_CYNCS, RecName: Full=Ammonium transporter {ECO:0000256|RuleBase:RU362002};
TRINITY_DN102313_c1_g2	217.909	108617	-8.96	3.18e-119	7.62e-117	down	GO:0005618,cell wall; GO:0005576,extracellular region; GO:0071555,cell wall organization; GO:0006952,defense response	K20727: PDF1.2; defensin-like protein 16	At2g26010	emb|CBK62698.1|	SF18_HELAN, RecName: Full=Anther-specific protein SF18; AltName: Full=Defensin-like protein; Flags: Precursor; Fragment;	D4IIH5_AMBAR, SubName: Full=Ragweed homologue of Art v 1 {ECO:0000313|EMBL:CBK62698.1};
TRINITY_DN95604_c0_g4	2641.24	134.369	4.29	3.87e-119	9.22e-117	up	--	--	--	--	--	--
TRINITY_DN102202_c0_g3	66.0189	595.364	-3.17	7.41e-119	1.76e-116	down	GO:0009570,chloroplast stroma; GO:0009535,chloroplast thylakoid membrane; GO:0045549,9-cis-epoxycarotenoid dioxygenase activity; GO:0046872,metal ion binding; GO:0009688,abscisic acid biosynthetic process; GO:0042538,hyperosmotic salinity response; GO:0006970,response to osmotic stress; GO:0009414,response to water deprivation	K09840: NCED; 9-cis-epoxycarotenoid dioxygenase [EC:1.13.11.51]	At3g14440	gb|KVI10563.1|	NCED3_ARATH, RecName: Full=9-cis-epoxycarotenoid dioxygenase NCED3, chloroplastic; Short=AtNCED3; EC=1.13.11.51; AltName: Full=Protein SALT TOLERANT 1; Flags: Precursor;	A0A118K6F5_CYNCS, SubName: Full=Carotenoid oxygenase {ECO:0000313|EMBL:KVI10563.1};
TRINITY_DN105955_c1_g3	303.388	1618.27	-2.42	2.2e-118	5.19e-116	down	--	--	At2g12210	dbj|BAJ33519.1|	--	E3WHA2_DAHPI, SubName: Full=CACTA transposable element {ECO:0000313|EMBL:BAJ33519.1};
TRINITY_DN98030_c1_g4	17.5137	2038.71	-6.86	1.67e-117	3.92e-115	down	GO:0005618,cell wall; GO:0005576,extracellular region; GO:0045330,aspartyl esterase activity; GO:0004857,enzyme inhibitor activity; GO:0030599,pectinesterase activity; GO:0042545,cell wall modification; GO:0045490,pectin catabolic process	K01051: E3.1.1.11; pectinesterase [EC:3.1.1.11]	At2g45220	ref|XP_021974188.1|	PME2_CITSI, RecName: Full=Pectinesterase 2; Short=PE 2; EC=3.1.1.11; AltName: Full=Pectin methylesterase; Flags: Precursor;	A0A251UE30_HELAN, RecName: Full=Pectinesterase {ECO:0000256|RuleBase:RU000589}; EC=3.1.1.11 {ECO:0000256|RuleBase:RU000589};
TRINITY_DN102818_c2_g2	11.4161	942.172	-6.39	2.49e-117	5.83e-115	down	GO:0005887,integral component of plasma membrane; GO:0016020,membrane; GO:0035673,oligopeptide transmembrane transporter activity; GO:0015031,protein transport	--	At4g26590	gb|KVH96697.1|	OPT5_ARATH, RecName: Full=Oligopeptide transporter 5; Short=AtOPT5;	A0A124SDE8_CYNCS, SubName: Full=Oligopeptide transporter OPT superfamily {ECO:0000313|EMBL:KVH96697.1};
TRINITY_DN93201_c0_g1	60.5473	763.451	-3.66	4.06e-117	9.44e-115	down	GO:0005794,Golgi apparatus; GO:0016021,integral component of membrane; GO:0031902,late endosome membrane; GO:0031201,SNARE complex; GO:0005774,vacuolar membrane; GO:0005773,vacuole; GO:0005484,SNAP receptor activity; GO:0000149,SNARE binding; GO:0006887,exocytosis; GO:0015031,protein transport; GO:0009651,response to salt stress; GO:0006906,vesicle fusion	K08515: VAMP7; vesicle-associated membrane protein 7	At5g11150	ref|XP_016574920.1|	VA713_ARATH, RecName: Full=Vesicle-associated membrane protein 713 {ECO:0000303|PubMed:11115874}; Short=AtVAMP713 {ECO:0000303|PubMed:11115874};	A0A2G2WL80_CAPBA, SubName: Full=Vesicle-associated membrane protein {ECO:0000313|EMBL:PHT45994.1};
TRINITY_DN106412_c5_g1	5879.14	17660.8	-1.59	1.13e-116	2.62e-114	down	--	--	--	--	--	--
TRINITY_DN101417_c3_g1	6149.3	25698.9	-2.06	7.27e-116	1.68e-113	down	--	--	--	--	--	--
TRINITY_DN107440_c1_g3	559.843	9477.21	-4.08	3.33e-115	7.64e-113	down	GO:0005737,cytoplasm; GO:0005874,microtubule; GO:0005525,GTP binding; GO:0003924,GTPase activity; GO:0005200,structural constituent of cytoskeleton; GO:0007017,microtubule-based process	K07375: TUBB; tubulin beta	At1g75780	gb|OEL12956.1|	TBB1_MAIZE, RecName: Full=Tubulin beta-1 chain; AltName: Full=Beta-1-tubulin;	A0A287LTU6_HORVV, RecName: Full=Tubulin beta chain {ECO:0000256|RuleBase:RU000352};
TRINITY_DN108423_c3_g3	31491.8	12025.9	1.39	1.23e-114	2.81e-112	up	--	--	--	--	--	--
TRINITY_DN102845_c3_g2	1249.89	17.7968	6.14	2.03e-114	4.62e-112	up	GO:0005737,cytoplasm; GO:0004364,glutathione transferase activity; GO:0006749,glutathione metabolic process; GO:0009407,toxin catabolic process	K00799: GST, gst; glutathione S-transferase [EC:2.5.1.18]	At1g78340	gb|KVI11422.1|	GSTX3_SOYBN, RecName: Full=Glutathione S-transferase 3; EC=2.5.1.18;	A0A103YLV8_CYNCS, SubName: Full=Glutathione S-transferase/chloride channel, C-terminal {ECO:0000313|EMBL:KVI11422.1}; Flags: Fragment;
TRINITY_DN107722_c1_g4	9029.32	1401	2.69	4.32e-114	9.79e-112	up	--	--	--	--	--	--
TRINITY_DN106058_c1_g1	1368.83	3857.51	-1.49	1.31e-113	2.95e-111	down	--	--	--	--	--	--
TRINITY_DN103604_c0_g3	6496.51	177.244	5.19	1.92e-113	4.3e-111	up	GO:0016021,integral component of membrane; GO:0043231,intracellular membrane-bounded organelle; GO:0050502,cis-zeatin O-beta-D-glucosyltransferase activity; GO:0046527,glucosyltransferase activity; GO:0080043,quercetin 3-O-glucosyltransferase activity; GO:0080046,quercetin 4'-O-glucosyltransferase activity; GO:0080044,quercetin 7-O-glucosyltransferase activity; GO:0050403,trans-zeatin O-beta-D-gl…	--	At2g36800	gb|KVH90497.1|	U73C5_ARATH, RecName: Full=UDP-glycosyltransferase 73C5; EC=2.4.1.-; AltName: Full=Cytokinin-O-glucosyltransferase 3; AltName: Full=Deoxynivalenol-glucosyl-transferase 1; AltName: Full=Zeatin O-glucosyltransferase 3; Short=AtZOG3;	A0A103XGY8_CYNCS, SubName: Full=UDP-glucuronosyl/UDP-glucosyltransferase {ECO:0000313|EMBL:KVH90497.1};
TRINITY_DN107945_c2_g1	20722.3	2577.99	3.01	3.75e-113	8.38e-111	up	--	--	--	--	--	--
TRINITY_DN103622_c3_g8	146.471	1063.01	-2.86	6.23e-113	1.39e-110	down	--	--	At5g38790	gb|KVI06481.1|	--	A0A118K3T4_CYNCS, SubName: Full=Uncharacterized protein {ECO:0000313|EMBL:KVI06481.1};
TRINITY_DN106855_c3_g2	3433.42	13784.4	-2.01	1.23e-112	2.72e-110	down	GO:0047763,caffeate O-methyltransferase activity; GO:0046983,protein dimerization activity; GO:0009809,lignin biosynthetic process	K13066: E2.1.1.68, COMT; caffeic acid 3-O-methyltransferase [EC:2.1.1.68]	At5g54160	dbj|BAG71895.1|	COMT1_ZINVI, RecName: Full=Caffeic acid 3-O-methyltransferase; Short=CAOMT; Short=COMT; EC=2.1.1.68; AltName: Full=S-adenosysl-L-methionine:caffeic acid 3-O-methyltransferase;	B6F0V0_CARTI, SubName: Full=5-hydroxyconiferaldehyde O-methyltransferase {ECO:0000313|EMBL:BAG71895.1};
TRINITY_DN99328_c1_g3	121.371	868.646	-2.84	1.77e-112	3.9e-110	down	--	--	At5g08580	gb|PLY71729.1|	--	A0A251UH70_HELAN, SubName: Full=Putative calcium-binding EF hand family protein {ECO:0000313|EMBL:OTG22444.1};
TRINITY_DN96261_c1_g1	2407.5	39.7481	5.92	1.95e-112	4.29e-110	up	--	--	--	--	--	--
TRINITY_DN105423_c2_g7	233.82	2201.99	-3.23	1.02e-111	2.24e-109	down	--	--	--	--	--	--
TRINITY_DN102313_c1_g1	525.711	304885	-9.18	1.55e-111	3.37e-109	down	GO:0005618,cell wall; GO:0005576,extracellular region; GO:0071555,cell wall organization; GO:0006952,defense response	K20727: PDF1.2; defensin-like protein 16	At1g19610	sp|P22357.1|	SF18_HELAN, RecName: Full=Anther-specific protein SF18; AltName: Full=Defensin-like protein; Flags: Precursor; Fragment;	A0A251V2Z2_HELAN, SubName: Full=Putative gamma-thionin {ECO:0000313|EMBL:OTG29977.1};
TRINITY_DN98657_c3_g1	1342.49	246.019	2.45	4.3e-111	9.33e-109	up	GO:0046872,metal ion binding; GO:0004722,protein serine/threonine phosphatase activity	--	At2g20630	gb|PLY69346.1|	P2C44_ORYSJ, RecName: Full=Probable protein phosphatase 2C 44; Short=OsPP2C44; EC=3.1.3.16;	A0A251V6N6_HELAN, SubName: Full=Uncharacterized protein {ECO:0000313|EMBL:OTG30786.1};
TRINITY_DN105561_c1_g1	149.054	1365.03	-3.2	6.44e-111	1.39e-108	down	--	--	--	--	--	--
TRINITY_DN99661_c1_g3	388.989	1406.25	-1.85	6.51e-111	1.4e-108	down	GO:0005737,cytoplasm; GO:0005634,nucleus; GO:0005886,plasma membrane; GO:0010187,negative regulation of seed germination; GO:0016567,protein ubiquitination; GO:0009737,response to abscisic acid; GO:0009651,response to salt stress	--	At5g13060	gb|PLY81460.1|	ARIA_ARATH, RecName: Full=ARM REPEAT PROTEIN INTERACTING WITH ABF2; Short=ARIA;	A0A251VL13_HELAN, SubName: Full=Putative ARM repeat protein interacting with ABF2 {ECO:0000313|EMBL:OTG36029.1};
TRINITY_DN105694_c4_g1	147.771	937.527	-2.66	1.34e-110	2.88e-108	down	GO:0005789,endoplasmic reticulum membrane; GO:0016021,integral component of membrane; GO:0016717,oxidoreductase activity, acting on paired donors, with oxidation of a pair of donors resulting in the reduction of molecular oxygen to two molecules of water; GO:0006636,unsaturated fatty acid biosynthetic process	K10256: FAD2; omega-6 fatty acid desaturase / acyl-lipid omega-6 desaturase (Delta-12 desaturase) [EC:1.14.19.6 1.14.19.22]	At3g12120	gb|AEK06377.1|	FD6E2_SOYBN, RecName: Full=Omega-6 fatty acid desaturase, endoplasmic reticulum isozyme 2; EC=1.14.19.-;	I6MCN7_CARTI, SubName: Full=Microsomal oleate desaturase FAD2-8 {ECO:0000313|EMBL:AEK06377.1};
TRINITY_DN99219_c2_g1	123.839	771.58	-2.64	3.31e-110	7.05e-108	down	--	--	--	--	--	--
TRINITY_DN106074_c1_g1	214.976	4971.24	-4.53	4.41e-110	9.38e-108	down	--	--	--	--	--	--
TRINITY_DN98120_c1_g4	2434.81	16.6011	7.19	5.88e-110	1.24e-107	up	GO:0016021,integral component of membrane	--	At1g14870	gb|PLY82891.1|	CNR10_MAIZE, RecName: Full=Cell number regulator 10; AltName: Full=ZmCNR10;	A0A251T3Y7_HELAN, SubName: Full=Putative PLAC8 motif-containing protein {ECO:0000313|EMBL:OTG05808.1};
TRINITY_DN108143_c2_g1	1443.64	22029.8	-3.93	1.98e-109	4.18e-107	down	GO:0005737,cytoplasm; GO:0005874,microtubule; GO:0005525,GTP binding; GO:0003924,GTPase activity; GO:0005200,structural constituent of cytoskeleton; GO:0007017,microtubule-based process	K07374: TUBA; tubulin alpha	At5g19780	gb|KVH90641.1|	TBA5_MAIZE, RecName: Full=Tubulin alpha-5 chain; AltName: Full=Alpha-5-tubulin;	A0A118JTX5_CYNCS, RecName: Full=Tubulin alpha chain {ECO:0000256|RuleBase:RU000352};
TRINITY_DN99431_c1_g1	205.59	1110.01	-2.43	2.54e-109	5.32e-107	down	GO:0009707,chloroplast outer membrane; GO:0016021,integral component of membrane; GO:0005524,ATP binding; GO:0005536,glucose binding; GO:0004396,hexokinase activity; GO:0001678,cellular glucose homeostasis; GO:0006096,glycolytic process	K00844: HK; hexokinase [EC:2.7.1.1]	At4g29130	gb|PLY86916.1|	HXK1_TOBAC, RecName: Full=Hexokinase-1; EC=2.7.1.1; AltName: Full=NtHxK1;	A0A251TNQ2_HELAN, RecName: Full=Phosphotransferase {ECO:0000256|RuleBase:RU362007}; EC=2.7.1.- {ECO:0000256|RuleBase:RU362007};
TRINITY_DN106882_c1_g1	1395.22	280.227	2.32	4.77e-109	9.96e-107	up	GO:0005789,endoplasmic reticulum membrane; GO:0016021,integral component of membrane; GO:0102811,geraniol 10-hydroxylase activity; GO:0020037,heme binding; GO:0005506,iron ion binding; GO:0016709,oxidoreductase activity, acting on paired donors, with incorporation or reduction of molecular oxygen, NAD(P)H as one donor, and incorporation of one atom of oxygen; GO:0016099,monoterpenoid biosynthetic…	--	At2g45570	gb|PLY93970.1|	C76B6_CATRO, RecName: Full=Geraniol 8-hydroxylase; EC=1.14.13.152; AltName: Full=Cytochrome P450 76B6; AltName: Full=Geraniol 10-hydroxylase; Short=CrG10H;	A0A251RYB9_HELAN, SubName: Full=Putative geraniol 8-hydroxylase {ECO:0000313|EMBL:OTF90856.1};
TRINITY_DN98337_c2_g1	822.844	84.0927	3.29	4.85e-109	1.01e-106	up	GO:0016021,integral component of membrane; GO:0016020,membrane; GO:0005345,purine nucleobase transmembrane transporter activity; GO:0006863,purine nucleobase transport; GO:0009624,response to nematode	--	At4g18210	ref|XP_022028709.1|	PUP10_ARATH, RecName: Full=Probable purine permease 10; Short=AtPUP10;	A0A251V7Z2_HELAN, SubName: Full=Putative purine permease, plant {ECO:0000313|EMBL:OTG31685.1};
TRINITY_DN106362_c3_g2	425.162	1309.32	-1.62	1.41e-108	2.92e-106	down	GO:0003677,DNA binding; GO:0008270,zinc ion binding	--	At2g36320	gb|KVI09633.1|	SAP4_ARATH, RecName: Full=Zinc finger A20 and AN1 domain-containing stress-associated protein 4; Short=AtSAP4;	A0A118K5U5_CYNCS, SubName: Full=Uncharacterized protein {ECO:0000313|EMBL:KVI09633.1};
TRINITY_DN108439_c3_g1	939.19	2592.1	-1.47	3.41e-108	7.04e-106	down	GO:0016157,sucrose synthase activity; GO:0005985,sucrose metabolic process	K00695: E2.4.1.13; sucrose synthase [EC:2.4.1.13]	At3g43190	ref|XP_021990602.1|	SUS1_DAUCA, RecName: Full=Sucrose synthase isoform 1; EC=2.4.1.13; AltName: Full=Sucrose synthase isoform I; AltName: Full=Sucrose-UDP glucosyltransferase 1; AltName: Full=Susy*Dc1;	A0A251TQG2_HELAN, RecName: Full=Sucrose synthase {ECO:0000256|RuleBase:RU280817}; EC=2.4.1.13 {ECO:0000256|RuleBase:RU280817};
TRINITY_DN98394_c1_g2	64.848	1128.8	-4.12	6.48e-108	1.33e-105	down	GO:0016021,integral component of membrane; GO:0005634,nucleus; GO:0005509,calcium ion binding; GO:0009409,response to cold	--	At1g02270	gb|KVI07525.1|	YC22_ARATH, RecName: Full=Uncharacterized calcium-binding protein At1g02270;	A0A103YEB3_CYNCS, SubName: Full=EF-Hand 1, calcium-binding site-containing protein {ECO:0000313|EMBL:KVI07525.1};
TRINITY_DN106325_c0_g3	1662.24	31.4102	5.72	2.19e-107	4.49e-105	up	--	--	--	--	--	--
TRINITY_DN101493_c5_g1	16.0999	2191.57	-7.08	3.36e-107	6.86e-105	down	--	--	--	--	--	--
TRINITY_DN107948_c3_g1	3704.83	1306.88	1.5	4.95e-107	1.01e-104	up	GO:0005737,cytoplasm; GO:0005524,ATP binding; GO:0004356,glutamate-ammonia ligase activity; GO:0006542,glutamine biosynthetic process; GO:0009399,nitrogen fixation	K01915: glnA, GLUL; glutamine synthetase [EC:6.3.1.2]	At5g37600	gb|OTF95421.1|	GLNA3_MEDSA, RecName: Full=Glutamine synthetase nodule isozyme; EC=6.3.1.2; AltName: Full=Glutamate--ammonia ligase;	A0A251SA37_HELAN, RecName: Full=Glutamine synthetase {ECO:0000256|RuleBase:RU004356}; EC=6.3.1.2 {ECO:0000256|RuleBase:RU004356};
TRINITY_DN98600_c0_g4	877.459	2337.25	-1.41	7.86e-107	1.59e-104	down	GO:0016021,integral component of membrane; GO:0005886,plasma membrane; GO:0015171,amino acid transmembrane transporter activity; GO:0003333,amino acid transmembrane transport	--	At2g39890	gb|KVH98994.1|	PROT2_ORYSJ, RecName: Full=Probable proline transporter 2;	A0A118JYS1_CYNCS, SubName: Full=Amino acid transporter, transmembrane {ECO:0000313|EMBL:KVH98994.1};
TRINITY_DN97204_c3_g5	15.3086	1296.8	-6.42	2.59e-106	5.21e-104	down	GO:0005618,cell wall; GO:0005576,extracellular region; GO:0045330,aspartyl esterase activity; GO:0004857,enzyme inhibitor activity; GO:0030599,pectinesterase activity; GO:0042545,cell wall modification; GO:0045490,pectin catabolic process	K01051: E3.1.1.11; pectinesterase [EC:3.1.1.11]	At2g45220	ref|XP_021974188.1|	PME2_CITSI, RecName: Full=Pectinesterase 2; Short=PE 2; EC=3.1.1.11; AltName: Full=Pectin methylesterase; Flags: Precursor;	A0A251UE30_HELAN, RecName: Full=Pectinesterase {ECO:0000256|RuleBase:RU000589}; EC=3.1.1.11 {ECO:0000256|RuleBase:RU000589};
TRINITY_DN103316_c0_g1	134.986	45050.1	-8.38	5.99e-106	1.2e-103	down	GO:0008289,lipid binding; GO:0006869,lipid transport	--	At2g38540	gb|KVH95031.1|	NLTP_HELAN, RecName: Full=Non-specific lipid-transfer protein; Short=LTP; Short=NsLTP; AltName: Full=SDI-9; Flags: Precursor;	A0A103XQG9_CYNCS, RecName: Full=Non-specific lipid-transfer protein {ECO:0000256|RuleBase:RU000628};
TRINITY_DN106237_c1_g3	27854	4511.75	2.63	1.41e-104	2.82e-102	up	--	--	--	--	--	--
TRINITY_DN94053_c0_g2	28.7425	481.571	-4.06	1.57e-103	3.11e-101	down	GO:0005905,clathrin-coated pit; GO:0030136,clathrin-coated vesicle; GO:0005794,Golgi apparatus; GO:0005545,1-phosphatidylinositol binding; GO:0030276,clathrin binding; GO:0048268,clathrin coat assembly; GO:0006897,endocytosis; GO:0015031,protein transport	--	At1g05020	gb|KVH93093.1|	AP180_ARATH, RecName: Full=Clathrin coat assembly protein AP180; Short=At-AP180; AltName: Full=Clathrin coat-associated protein AP180;	A0A103XLS8_CYNCS, SubName: Full=AP180 N-terminal homology (ANTH) domain-containing protein {ECO:0000313|EMBL:KVH93093.1};
TRINITY_DN97437_c0_g2	1520.24	65.4416	4.54	2.43e-103	4.8e-101	up	GO:0048046,apoplast; GO:0005618,cell wall; GO:0004866,endopeptidase inhibitor activity	--	At1g17860	gb|KVI00176.1|	KTI2_ARATH, RecName: Full=Kunitz trypsin inhibitor 2 {ECO:0000305}; Short=AtKTI2 {ECO:0000305}; Flags: Precursor;	A0A103Y0A9_CYNCS, SubName: Full=Kunitz inhibitor ST1-like protein {ECO:0000313|EMBL:KVI00176.1};
TRINITY_DN98339_c7_g1	3736.37	100.153	5.22	3.14e-103	6.19e-101	up	GO:0043231,intracellular membrane-bounded organelle; GO:0080043,quercetin 3-O-glucosyltransferase activity; GO:0080046,quercetin 4'-O-glucosyltransferase activity; GO:0080044,quercetin 7-O-glucosyltransferase activity; GO:0035251,UDP-glucosyltransferase activity; GO:0051555,flavonol biosynthetic process	--	At2g36790	gb|KVH90497.1|	U73C6_ARATH, RecName: Full=UDP-glycosyltransferase 73C6; EC=2.4.1.-; AltName: Full=Flavonol-3-O-glycoside-7-O-glucosyltransferase 1; AltName: Full=Zeatin O-glucosyltransferase 2;	A0A103XGY8_CYNCS, SubName: Full=UDP-glucuronosyl/UDP-glucosyltransferase {ECO:0000313|EMBL:KVH90497.1};
TRINITY_DN98961_c2_g9	24.7506	570.961	-4.53	4.19e-103	8.22e-101	down	--	--	--	--	--	--
TRINITY_DN106395_c1_g7	6.50839	954.578	-7.22	1.12e-102	2.19e-100	down	GO:0016021,integral component of membrane; GO:0005345,purine nucleobase transmembrane transporter activity; GO:0005215,transporter activity; GO:0015853,adenine transport; GO:0015854,guanine transport; GO:0006863,purine nucleobase transport	--	At3g10960	gb|PLY72049.1|	AZG1_ARATH, RecName: Full=Adenine/guanine permease AZG1; AltName: Full=AzgA-homolog protein; AltName: Full=Protein AZAGUANINE RESISTANT 1; Short=AtAzg1;	A0A103YDF2_CYNCS, SubName: Full=Xanthine/uracil/vitamin C permease {ECO:0000313|EMBL:KVI07054.1};
TRINITY_DN107876_c0_g1	387.082	4647.64	-3.58	1.29e-102	2.52e-100	down	--	--	--	--	--	--
TRINITY_DN106961_c0_g1	1797.19	409.527	2.14	1.49e-102	2.89e-100	up	--	--	--	--	--	--
TRINITY_DN97032_c0_g5	311.864	1657.75	-2.41	1.32e-101	2.55e-99	down	--	--	--	--	--	--
TRINITY_DN105545_c0_g1	579.237	7742.58	-3.74	1.2e-100	2.32e-98	down	GO:0005509,calcium ion binding	K13448: CML; calcium-binding protein CML	At3g25600	gb|PLY86863.1|	CML16_ARATH, RecName: Full=Probable calcium-binding protein CML16; AltName: Full=Calmodulin-like protein 16;	A0A124SG57_CYNCS, SubName: Full=Calcium-binding EF-hand {ECO:0000313|EMBL:KVI05341.1};
TRINITY_DN99601_c2_g3	209.388	2283.49	-3.45	1.35e-100	2.58e-98	down	GO:0005737,cytoplasm; GO:0045431,flavonol synthase activity; GO:0031418,L-ascorbic acid binding; GO:0046872,metal ion binding; GO:0045486,naringenin 3-dioxygenase activity	K05278: FLS; flavonol synthase [EC:1.14.20.6]	At5g08640	gb|ALG75883.1|	FLS_CITUN, RecName: Full=Flavonol synthase/flavanone 3-hydroxylase; EC=1.14.11.23 {ECO:0000250|UniProtKB:Q7XZQ6}; EC=1.14.11.9 {ECO:0000250|UniProtKB:Q7XZQ6}; AltName: Full=CitFLS; Short=FLS;	A0A1L1ZNN1_CARTI, SubName: Full=FLS1 {ECO:0000313|EMBL:ATZ81758.1}; SubName: Full=Flavonol synthase {ECO:0000313|EMBL:ALG75883.1}; EC=1.14.11.23 {ECO:0000313|EMBL:ALG75883.1};
TRINITY_DN98789_c1_g1	363.812	1674.19	-2.2	2.95e-100	5.64e-98	down	GO:0005829,cytosol; GO:0005634,nucleus; GO:0005524,ATP binding; GO:0042802,identical protein binding; GO:0004672,protein kinase activity; GO:0004674,protein serine/threonine kinase activity; GO:0035556,intracellular signal transduction; GO:0048573,photoperiodism, flowering; GO:0009911,positive regulation of flower development; GO:0046777,protein autophosphorylation; GO:0006468,protein phosphoryla…	--	At5g41990	ref|XP_022020814.1|	WNK8_ARATH, RecName: Full=Serine/threonine-protein kinase WNK8; Short=AtWNK8; EC=2.7.11.1; AltName: Full=Protein kinase with no lysine 8;	A0A251VG64_HELAN, SubName: Full=Putative with no lysine (K) kinase 8 {ECO:0000313|EMBL:OTG34565.1};
TRINITY_DN99745_c0_g1	1159.72	11.4503	6.67	4.06e-100	7.73e-98	up	GO:0005737,cytoplasm; GO:0016020,membrane; GO:0047372,acylglycerol lipase activity; GO:0016298,lipase activity; GO:0004620,phospholipase activity; GO:0071456,cellular response to hypoxia; GO:0051607,defense response to virus; GO:0016042,lipid catabolic process; GO:0006629,lipid metabolic process; GO:0031408,oxylipin biosynthetic process; GO:0009626,plant-type hypersensitive response; GO:0046686,r…	--	At2g26560	gb|KVH98361.1|	PLP2_ARATH, RecName: Full=Patatin-like protein 2; Short=AtPLP2; EC=3.1.1.-; AltName: Full=Patatin-related phospholipase A IIalpha; Short=pPLAIIa; AltName: Full=Phospholipase A IIA; Short=AtPLAIIA;	A0A103XWV6_CYNCS, RecName: Full=Patatin {ECO:0000256|RuleBase:RU361262}; EC=3.1.1.- {ECO:0000256|RuleBase:RU361262};
TRINITY_DN94053_c0_g1	34.3612	464.304	-3.76	5.89e-100	1.12e-97	down	GO:0005905,clathrin-coated pit; GO:0030136,clathrin-coated vesicle; GO:0005794,Golgi apparatus; GO:0005545,1-phosphatidylinositol binding; GO:0030276,clathrin binding; GO:0048268,clathrin coat assembly; GO:0006897,endocytosis; GO:0015031,protein transport	--	At1g05020	gb|KVH93093.1|	AP180_ARATH, RecName: Full=Clathrin coat assembly protein AP180; Short=At-AP180; AltName: Full=Clathrin coat-associated protein AP180;	A0A103XLS8_CYNCS, SubName: Full=AP180 N-terminal homology (ANTH) domain-containing protein {ECO:0000313|EMBL:KVH93093.1};
TRINITY_DN106325_c0_g1	14244.6	429.526	5.05	1.68e-99	3.18e-97	up	GO:0016298,lipase activity; GO:0080031,methyl salicylate esterase activity; GO:0009862,systemic acquired resistance, salicylic acid mediated signaling pathway	K20802: HNL; (R)-mandelonitrile lyase [EC:4.1.2.10]	At2g23590	gb|KVI02659.1|	SABP2_TOBAC, RecName: Full=Salicylic acid-binding protein 2; Short=NtSABP2; EC=3.1.1.-; AltName: Full=Methyl salicylate esterase;	A0A103Y528_CYNCS, SubName: Full=Uncharacterized protein {ECO:0000313|EMBL:KVI02659.1};
TRINITY_DN104245_c1_g1	237.356	1343.25	-2.5	1.8e-99	3.39e-97	down	GO:0005789,endoplasmic reticulum membrane; GO:0016021,integral component of membrane; GO:0015031,protein transport	K10956: SEC61A; protein transport protein SEC61 subunit alpha	Hs14589847	gb|ABR16326.1|	SC61A_PYRSA, RecName: Full=Protein transport protein Sec61 subunit alpha;	T0QLW8_9STRA, SubName: Full=Protein transporter Sec61 subunit alpha {ECO:0000313|EMBL:EQC35721.1};
TRINITY_DN100752_c0_g3	148.143	957.671	-2.69	8.58e-99	1.61e-96	down	GO:0035091,phosphatidylinositol binding	--	At1g47270	gb|KVI02847.1|	TLP5_ORYSJ, RecName: Full=Tubby-like F-box protein 5; Short=OsTLP5; AltName: Full=Tubby-like F-box protein 8; Short=OsTLP8;	A0A103Y5F4_CYNCS, RecName: Full=Tubby-like F-box protein {ECO:0000256|RuleBase:RU361125};
TRINITY_DN108270_c1_g5	215.315	1997.5	-3.21	8.73e-99	1.63e-96	down	GO:0005794,Golgi apparatus; GO:0000139,Golgi membrane; GO:0016021,integral component of membrane; GO:0005886,plasma membrane; GO:0016760,cellulose synthase (UDP-forming) activity; GO:0016759,cellulose synthase activity; GO:0071555,cell wall organization; GO:0030244,cellulose biosynthetic process; GO:0009833,plant-type primary cell wall biogenesis	--	At4g24000	gb|PLY64874.1|	CSLG3_ARATH, RecName: Full=Cellulose synthase-like protein G3; Short=AtCslG3; EC=2.4.1.-;	A0A103XR30_CYNCS, SubName: Full=Cellulose synthase {ECO:0000313|EMBL:KVH95312.1};
TRINITY_DN107247_c0_g2	702.331	165.201	2.09	1.4e-98	2.61e-96	up	GO:0005634,nucleus; GO:0005886,plasma membrane; GO:0005524,ATP binding; GO:0004675,transmembrane receptor protein serine/threonine kinase activity; GO:0007166,cell surface receptor signaling pathway; GO:0006952,defense response; GO:0006468,protein phosphorylation	K04733: IRAK4; interleukin-1 receptor-associated kinase 4 [EC:2.7.11.1]	At1g76360	gb|PLY90485.1|	PIX13_ARATH, RecName: Full=Probable serine/threonine-protein kinase PIX13 {ECO:0000305}; EC=2.7.11.1 {ECO:0000305};	A0A103YEN0_CYNCS, SubName: Full=Concanavalin A-like lectin/glucanase, subgroup {ECO:0000313|EMBL:KVI07705.1};
TRINITY_DN103503_c7_g3	580.485	26.786	4.44	1.51e-98	2.8e-96	up	--	--	At2g39210	gb|KVI05031.1|	--	A0A103Y9J3_CYNCS, SubName: Full=Major facilitator superfamily {ECO:0000313|EMBL:KVI05031.1};
TRINITY_DN101845_c4_g2	624.566	99.6631	2.65	2.82e-98	5.22e-96	up	GO:0045551,cinnamyl-alcohol dehydrogenase activity; GO:0052747,sinapyl alcohol dehydrogenase activity; GO:0008270,zinc ion binding; GO:0009809,lignin biosynthetic process	K00083: E1.1.1.195; cinnamyl-alcohol dehydrogenase [EC:1.1.1.195]	At3g19450	dbj|BAN91671.1|	CADH1_ARACO, RecName: Full=Probable cinnamyl alcohol dehydrogenase 1; Short=CAD 1; EC=1.1.1.195;	U3TH11_CARTI, SubName: Full=Cinnamyl alcohol dehydrogenase 2 {ECO:0000313|EMBL:BAN91671.1};
TRINITY_DN101343_c1_g2	112.19	699.179	-2.64	1.24e-96	2.28e-94	down	GO:0005768,endosome; GO:0005794,Golgi apparatus; GO:0016021,integral component of membrane; GO:0005802,trans-Golgi network; GO:0016413,O-acetyltransferase activity; GO:0071554,cell wall organization or biogenesis	--	At5g20680	gb|KVI01163.1|	TBL16_ARATH, RecName: Full=Protein trichome birefringence-like 16;	A0A103Y267_CYNCS, SubName: Full=Uncharacterized protein {ECO:0000313|EMBL:KVI01163.1};
TRINITY_DN105156_c3_g5	54.0085	488.619	-3.17	4.86e-96	8.91e-94	down	--	--	At3g11760	gb|KVI07401.1|	--	A0A103YE48_CYNCS, SubName: Full=EEIG1/EHBP1 N-terminal domain-containing protein {ECO:0000313|EMBL:KVI07401.1};
TRINITY_DN103494_c2_g1	315.694	1076.86	-1.77	5.55e-96	1.01e-93	down	GO:0005737,cytoplasm; GO:0003839,gamma-glutamylcyclotransferase activity; GO:0016829,lyase activity; GO:0006751,glutathione catabolic process; GO:0046686,response to cadmium ion; GO:0010288,response to lead ion	K22596: GGCT; gamma-glutamylcyclotransferase, plant [EC:4.3.2.9]	At5g26220	ref|XP_022029079.1|	GCT21_ARATH, RecName: Full=Gamma-glutamylcyclotransferase 2-1 {ECO:0000305}; Short=AtGGCT2;1 {ECO:0000303|PubMed:24214398}; EC=4.3.2.9 {ECO:0000269|PubMed:24214398}; AltName: Full=Gamma-glutamyl cyclotransferase 2;1 {ECO:0000303|PubMed:24214398};	A0A251V8W6_HELAN, RecName: Full=Gamma-glutamylcyclotransferase {ECO:0000256|RuleBase:RU363081}; EC=4.3.2.9 {ECO:0000256|RuleBase:RU363081};
TRINITY_DN100674_c3_g1	2624.26	1092.14	1.27	1.87e-95	3.4e-93	up	--	--	At2g32150	gb|PLY83227.1|	--	A0A251U0S9_HELAN, SubName: Full=Putative haloacid dehalogenase-like hydrolase (HAD) superfamily protein {ECO:0000313|EMBL:OTG16402.1};
TRINITY_DN101882_c4_g7	197.791	1349.46	-2.77	3.03e-95	5.51e-93	down	--	--	--	gb|KVI05468.1|	--	A0A103YAE4_CYNCS, SubName: Full=Uncharacterized protein {ECO:0000313|EMBL:KVI05468.1};
TRINITY_DN98222_c1_g2	843.73	272.675	1.63	6.94e-95	1.26e-92	up	GO:0010008,endosome membrane; GO:0016021,integral component of membrane; GO:0005886,plasma membrane; GO:0005524,ATP binding; GO:0033612,receptor serine/threonine kinase binding; GO:0004675,transmembrane receptor protein serine/threonine kinase activity; GO:0004714,transmembrane receptor protein tyrosine kinase activity; GO:0007166,cell surface receptor signaling pathway	K13416: BAK1; brassinosteroid insensitive 1-associated receptor kinase 1 [EC:2.7.10.1 2.7.11.1]	At1g71830	gb|PLY88539.1|	BAK1_ARATH, RecName: Full=BRASSINOSTEROID INSENSITIVE 1-associated receptor kinase 1 {ECO:0000303|PubMed:12150929}; Short=AtBAK1 {ECO:0000303|PubMed:12150929}; Short=BRI1-associated receptor kinase 1 {ECO:0000303|PubMed:12150929}; EC=2.7.10.1 {ECO:0000305}; EC=2.7.11.1 {ECO:0000305}; AltName: Full=Protein ELONGATED; AltName: Full=Somatic embryogenesis receptor kinase 3 {ECO:0000303|PubMed:1170616…	A0A251RNT9_HELAN, SubName: Full=Putative BRI1-associated receptor kinase {ECO:0000313|EMBL:OTF86163.1};
TRINITY_DN91018_c0_g1	116.551	6088.71	-5.71	8.38e-95	1.51e-92	down	GO:0016021,integral component of membrane	--	At2g45180	ref|XP_012828247.1|	14KD_DAUCA, RecName: Full=14 kDa proline-rich protein DC2.15; Flags: Precursor;	A0A022PSS9_ERYGU, SubName: Full=Uncharacterized protein {ECO:0000313|EMBL:EYU18564.1};
TRINITY_DN102134_c1_g3	7.09627	906.019	-7	1.92e-94	3.45e-92	down	GO:0000287,magnesium ion binding; GO:0010333,terpene synthase activity; GO:0008152,metabolic process	K15803: GERD; (-)-germacrene D synthase [EC:4.2.3.75]	At5g23960	gb|KVF84623.1|	CARS_ARTAN, RecName: Full=Beta-caryophyllene synthase; EC=4.2.3.57;	A0A103LYV1_CYNCS, SubName: Full=Terpene synthase, metal-binding domain-containing protein {ECO:0000313|EMBL:KVF84623.1};
TRINITY_DN104453_c0_g3	89.7393	21021.8	-7.87	1.97e-94	3.53e-92	down	--	--	--	--	--	--
TRINITY_DN107749_c1_g1	3450.02	690.029	2.32	3.38e-94	6.03e-92	up	GO:0005737,cytoplasm; GO:0004471,malate dehydrogenase (decarboxylating) (NAD+) activity; GO:0004473,malate dehydrogenase (decarboxylating) (NADP+) activity; GO:0046872,metal ion binding; GO:0051287,NAD binding; GO:0008948,oxaloacetate decarboxylase activity; GO:0006108,malate metabolic process; GO:0051260,protein homooligomerization	K00029: E1.1.1.40, maeB; malate dehydrogenase (oxaloacetate-decarboxylating)(NADP+) [EC:1.1.1.40]	At1g79750	gb|AAK83073.1|	MAOX_VITVI, RecName: Full=NADP-dependent malic enzyme; Short=NADP-ME; EC=1.1.1.40;	Q94G03_FLAPR, RecName: Full=Malic enzyme {ECO:0000256|RuleBase:RU003426};
TRINITY_DN101968_c1_g4	22.0204	419.773	-4.25	4.04e-94	7.18e-92	down	GO:0005634,nucleus; GO:0005524,ATP binding; GO:0004693,cyclin-dependent protein serine/threonine kinase activity; GO:0006468,protein phosphorylation	--	At4g10010	gb|KVH98259.1|	Y1960_ARATH, RecName: Full=Probable serine/threonine-protein kinase At1g09600; EC=2.7.11.-;	A0A118JYZ4_CYNCS, SubName: Full=Uncharacterized protein {ECO:0000313|EMBL:KVH98259.1}; Flags: Fragment;
TRINITY_DN103537_c3_g4	106.399	1116.49	-3.39	6.62e-94	1.17e-91	down	GO:0005634,nucleus; GO:0009734,auxin-activated signaling pathway; GO:0006355,regulation of transcription, DNA-templated; GO:0009733,response to auxin; GO:0006351,transcription, DNA-templated	K14484: IAA; auxin-responsive protein IAA	At1g04250	ref|XP_022017432.1|	IAA1_ORYSJ, RecName: Full=Auxin-responsive protein IAA1; AltName: Full=Indoleacetic acid-induced protein 1;	A0A251RVX7_HELAN, RecName: Full=Auxin-responsive protein {ECO:0000256|RuleBase:RU004549};
TRINITY_DN94283_c0_g2	3921.6	11.7583	8.38	1.26e-93	2.21e-91	up	GO:0005576,extracellular region; GO:0006952,defense response; GO:0009607,response to biotic stimulus	K13449: PR1; pathogenesis-related protein 1	At4g33720	gb|PLY69782.1|	PR1_SAMNI, RecName: Full=Pathogenesis-related protein PR-1 type; Flags: Precursor;	A0A103XM86_CYNCS, SubName: Full=Allergen V5/Tpx-1-related protein {ECO:0000313|EMBL:KVH93361.1};
TRINITY_DN100322_c4_g1	174.458	1808.98	-3.38	1.36e-93	2.38e-91	down	GO:0005634,nucleus; GO:0003700,DNA binding transcription factor activity; GO:0042802,identical protein binding; GO:0009734,auxin-activated signaling pathway; GO:1900057,positive regulation of leaf senescence; GO:0009733,response to auxin; GO:0006351,transcription, DNA-templated	K14484: IAA; auxin-responsive protein IAA	At1g04250	gb|KVH93000.1|	IAA17_ARATH, RecName: Full=Auxin-responsive protein IAA17; AltName: Full=Auxin response 3; AltName: Full=Indoleacetic acid-induced protein 17;	A0A103XLS3_CYNCS, RecName: Full=Auxin-responsive protein {ECO:0000256|RuleBase:RU004549};
TRINITY_DN95093_c1_g1	41.4467	20336.1	-8.94	1.04e-92	1.81e-90	down	--	--	--	--	--	--
TRINITY_DN91845_c0_g1	13.0811	538.826	-5.36	2.05e-92	3.57e-90	down	GO:0043231,intracellular membrane-bounded organelle; GO:0004519,endonuclease activity; GO:0003723,RNA binding; GO:0009451,RNA modification	--	At2g37310	gb|KVH90519.1|	PP191_ARATH, RecName: Full=Pentatricopeptide repeat-containing protein At2g37310;	A0A118JTY1_CYNCS, SubName: Full=Pentatricopeptide repeat-containing protein {ECO:0000313|EMBL:KVH90519.1};
TRINITY_DN108012_c2_g1	565.899	5312.54	-3.23	5.17e-92	8.98e-90	down	GO:0005887,integral component of plasma membrane; GO:0009705,plant-type vacuole membrane; GO:0005773,vacuole; GO:0005366,myo-inositol:proton symporter activity; GO:0015798,myo-inositol transport	--	At2g43330	gb|PLY66704.1|	INT1_ARATH, RecName: Full=Inositol transporter 1;	A0A251VKF2_HELAN, SubName: Full=Putative inositol transporter 1 {ECO:0000313|EMBL:OTG35556.1};
TRINITY_DN105118_c1_g3	754.251	2740.75	-1.86	5.9e-92	1.02e-89	down	GO:0005794,Golgi apparatus; GO:0016021,integral component of membrane; GO:0005886,plasma membrane; GO:0009506,plasmodesma; GO:0005524,ATP binding; GO:0004675,transmembrane receptor protein serine/threonine kinase activity; GO:0007166,cell surface receptor signaling pathway; GO:0006468,protein phosphorylation	--	At3g23750	gb|KVI00431.1|	TMK4_ARATH, RecName: Full=Receptor-like kinase TMK4 {ECO:0000303|PubMed:23613767}; EC=2.7.11.1 {ECO:0000305}; AltName: Full=BAK1-associating receptor-like kinase 1 {ECO:0000303|PubMed:23921992}; AltName: Full=Leucine-rich repeat receptor-like kinases TMK4 {ECO:0000303|PubMed:23613767}; AltName: Full=Transmembrane kinase 4 {ECO:0000303|PubMed:23613767}; Flags: Precursor;	A0A103Y0T2_CYNCS, SubName: Full=Uncharacterized protein {ECO:0000313|EMBL:KVI00431.1};
TRINITY_DN88002_c0_g1	155.715	1227.62	-2.98	6.25e-92	1.08e-89	down	GO:0005576,extracellular region; GO:0006952,defense response; GO:0009607,response to biotic stimulus	--	At4g30320	gb|KVI01388.1|	PR1_MEDTR, RecName: Full=Pathogenesis-related protein PR-1; Flags: Precursor;	A0A103Y2L2_CYNCS, SubName: Full=Allergen V5/Tpx-1-related protein {ECO:0000313|EMBL:KVI01388.1};
TRINITY_DN99581_c4_g1	199.404	727.895	-1.87	1.3e-91	2.23e-89	down	--	--	--	--	--	--
TRINITY_DN102089_c6_g1	432.273	1400.31	-1.69	2.22e-91	3.78e-89	down	GO:0030659,cytoplasmic vesicle membrane; GO:0016021,integral component of membrane; GO:0102490,8-oxo-dGTP phosphohydrolase activity; GO:0005524,ATP binding; GO:0102485,dATP phosphohydrolase activity; GO:0102486,dCTP phosphohydrolase activity; GO:0102491,dGTP phosphohydrolase activity; GO:0102488,dTTP phosphohydrolase activity; GO:0102487,dUTP phosphohydrolase activity; GO:0102489,GTP phosphohydro…	K01510: ENTPD1_3_8, CD39; apyrase [EC:3.6.1.5]	At1g14250	gb|PLY97406.1|	APY6_ARATH, RecName: Full=Probable apyrase 6; Short=AtAPY6; EC=3.6.1.5; AltName: Full=ATP-diphosphatase; AltName: Full=ATP-diphosphohydrolase; AltName: Full=Adenosine diphosphatase; Short=ADPase; AltName: Full=NTPDase; AltName: Full=Nucleoside triphosphate diphosphohydrolase 6;	A0A251T826_HELAN, SubName: Full=Putative GDA1/CD39 nucleoside phosphatase family protein {ECO:0000313|EMBL:OTG06081.1};
TRINITY_DN103477_c6_g1	2775	172.527	4.01	2.76e-91	4.69e-89	up	--	--	--	gb|KVI06828.1|	--	A0A118K426_CYNCS, SubName: Full=Uncharacterized protein {ECO:0000313|EMBL:KVI06828.1};
TRINITY_DN97787_c1_g4	2267.98	17.1501	7.05	3.62e-91	6.13e-89	up	GO:0005618,cell wall; GO:0005576,extracellular region; GO:0004575,sucrose alpha-glucosidase activity; GO:0005975,carbohydrate metabolic process	K01193: INV, sacA; beta-fructofuranosidase [EC:3.2.1.26]	At2g36190	gb|KVI12026.1|	INV3_DAUCA, RecName: Full=Beta-fructofuranosidase, insoluble isoenzyme 3; EC=3.2.1.26; AltName: Full=Cell wall beta-fructosidase 3; AltName: Full=Invertase 3; AltName: Full=Sucrose hydrolase 3; Flags: Precursor;	A0A103YMS9_CYNCS, SubName: Full=Concanavalin A-like lectin/glucanase superfamily {ECO:0000313|EMBL:KVI12026.1};
TRINITY_DN100453_c0_g2	683.659	31.2458	4.45	9.32e-91	1.58e-88	up	GO:0046872,metal ion binding; GO:0016491,oxidoreductase activity	K13229: BX6; 2,4-dihydroxy-1,4-benzoxazin-3-one-glucoside dioxygenase [EC:1.14.11.59]	At1g06650	gb|KVH35853.1|	ACCH3_ARATH, RecName: Full=1-aminocyclopropane-1-carboxylate oxidase homolog 3;	A0A103UHV1_CYNCS, SubName: Full=Non-heme dioxygenase N-terminal domain-containing protein {ECO:0000313|EMBL:KVH35853.1};
TRINITY_DN107138_c0_g4	3919.7	232.721	4.07	1.15e-90	1.93e-88	up	GO:0016021,integral component of membrane; GO:0005743,mitochondrial inner membrane; GO:0070469,respiratory chain; GO:0009916,alternative oxidase activity; GO:0046872,metal ion binding; GO:0102721,ubiquinol:oxygen oxidoreductase activity	--	At3g22370	gb|PLY88854.1|	AOX3_ARATH, RecName: Full=Ubiquinol oxidase 3, mitochondrial; EC=1.10.3.11; AltName: Full=Alternative oxidase 3; Flags: Precursor;	A0A124SBR7_CYNCS, RecName: Full=Ubiquinol oxidase {ECO:0000256|RuleBase:RU003779}; EC=1.10.3.11 {ECO:0000256|RuleBase:RU003779};
TRINITY_DN101794_c1_g1	440.596	2023.37	-2.2	1.79e-90	3e-88	down	--	--	--	--	--	--
TRINITY_DN106304_c3_g13	4.78457	1011.15	-7.72	1.98e-90	3.32e-88	down	GO:0009507,chloroplast; GO:0016758,transferase activity, transferring hexosyl groups; GO:0008152,metabolic process	K21371: UGT75L6, UGTCs2; crocetin glucosyltransferase [EC:2.4.1.271]	At1g05560	gb|KVI03585.1|	UGT1_GARJA, RecName: Full=Crocetin glucosyltransferase, chloroplastic; EC=2.4.1.271; AltName: Full=UDP-glucose glucosyltransferase 1; Short=GjUGT1; AltName: Full=UDP-glycosyltransferase 75L6; Flags: Precursor;	A0A118K1Z7_CYNCS, RecName: Full=Glycosyltransferase {ECO:0000256|RuleBase:RU362057}; EC=2.4.1.- {ECO:0000256|RuleBase:RU362057};
TRINITY_DN107339_c4_g2	3922.46	7961.02	-1.02	2.61e-90	4.35e-88	down	GO:0016021,integral component of membrane; GO:0005774,vacuolar membrane; GO:0009678,hydrogen-translocating pyrophosphatase activity; GO:0004427,inorganic diphosphatase activity; GO:0046872,metal ion binding; GO:0015992,NA	K01507: ppa; inorganic pyrophosphatase [EC:3.6.1.1]	At1g15690	gb|KVI01327.1|	AVP_VIGRR, RecName: Full=Pyrophosphate-energized vacuolar membrane proton pump; EC=3.6.1.1; AltName: Full=Pyrophosphate-energized inorganic pyrophosphatase; Short=H(+)-PPase; AltName: Full=Vacuolar H(+)-pyrophosphatase;	A0A103Y2I8_CYNCS, SubName: Full=Pyrophosphate-energised proton pump {ECO:0000313|EMBL:KVI01327.1};
TRINITY_DN100591_c2_g4	20.6286	468.12	-4.51	3.92e-90	6.52e-88	down	GO:0005622,intracellular; GO:0005886,plasma membrane; GO:0005524,ATP binding; GO:0004672,protein kinase activity; GO:0004674,protein serine/threonine kinase activity; GO:0004712,protein serine/threonine/tyrosine kinase activity; GO:0004713,protein tyrosine kinase activity; GO:0004871,signal transducer activity; GO:0035556,intracellular signal transduction; GO:0006468,protein phosphorylation	K01968: E6.4.1.4A; 3-methylcrotonyl-CoA carboxylase alpha subunit [EC:6.4.1.4]	At3g22750	gb|PLY95804.1|	STY13_ARATH, RecName: Full=Serine/threonine-protein kinase STY13 {ECO:0000305}; EC=2.7.11.1 {ECO:0000269|PubMed:16429265}; AltName: Full=AtSTYPK {ECO:0000303|PubMed:17291444}; AltName: Full=Serine/threonine/tyrosine-protein kinase 13 {ECO:0000303|PubMed:16429265};	A0A251VFQ8_HELAN, SubName: Full=Putative serine-threonine/tyrosine-protein kinase catalytic domain-containing protein {ECO:0000313|EMBL:OTG33521.1};
TRINITY_DN93882_c1_g4	187.224	689.226	-1.88	5.29e-90	8.77e-88	down	GO:0030015,CCR4-NOT core complex; GO:0005634,nucleus; GO:0000932,P-body; GO:0008408,3'-5' exonuclease activity; GO:0046872,metal ion binding; GO:0004535,poly(A)-specific ribonuclease activity; GO:0003723,RNA binding; GO:0042742,defense response to bacterium; GO:0043928,exonucleolytic nuclear-transcribed mRNA catabolic process involved in deadenylation-dependent decay; GO:0017148,negative regulati…	K12581: CNOT7_8, CAF1, POP2; CCR4-NOT transcription complex subunit 7/8	At5g22250	gb|KVI08330.1|	CAF1K_ARATH, RecName: Full=Probable CCR4-associated factor 1 homolog 11; EC=3.1.13.4;	A0A103YFU6_CYNCS, SubName: Full=Ribonuclease CAF1 {ECO:0000313|EMBL:KVI08330.1};
TRINITY_DN107531_c0_g1	1540.21	3146.03	-1.03	8.79e-90	1.45e-87	down	--	--	--	--	--	--
TRINITY_DN96616_c2_g2	2675.87	7644.02	-1.51	9.74e-90	1.6e-87	down	GO:0005794,Golgi apparatus; GO:0000139,Golgi membrane; GO:0016021,integral component of membrane; GO:0005886,plasma membrane; GO:0016760,cellulose synthase (UDP-forming) activity; GO:0016759,cellulose synthase activity; GO:0071555,cell wall organization; GO:0030244,cellulose biosynthetic process; GO:0009833,plant-type primary cell wall biogenesis	K10891: FANCD2; fanconi anemia group D2 protein	At2g32540	gb|KVH88967.1|	CSLH1_ORYSJ, RecName: Full=Cellulose synthase-like protein H1; EC=2.4.1.-; AltName: Full=OsCslH1;	A0A103XDY1_CYNCS, SubName: Full=Cellulose synthase {ECO:0000313|EMBL:KVH88967.1};
TRINITY_DN55111_c0_g1	392.597	1198.41	-1.61	1.49e-89	2.44e-87	down	--	--	--	--	--	--
TRINITY_DN99193_c2_g3	49.8953	492.741	-3.3	1.73e-89	2.83e-87	down	--	--	--	--	--	--
TRINITY_DN99175_c2_g1	615.279	2747.63	-2.16	1.74e-89	2.83e-87	down	--	--	At2g39650	gb|KVI09815.1|	--	A0A103YIM5_CYNCS, SubName: Full=Uncharacterized protein {ECO:0000313|EMBL:KVI09815.1};
TRINITY_DN103612_c0_g2	4.41683	1116.52	-7.96	2.47e-89	4.02e-87	down	GO:0016021,integral component of membrane; GO:0005345,purine nucleobase transmembrane transporter activity; GO:0005215,transporter activity; GO:0015853,adenine transport; GO:0015854,guanine transport; GO:0006863,purine nucleobase transport	--	At3g10960	gb|KVI10017.1|	AZG1_ARATH, RecName: Full=Adenine/guanine permease AZG1; AltName: Full=AzgA-homolog protein; AltName: Full=Protein AZAGUANINE RESISTANT 1; Short=AtAzg1;	A0A103YJ36_CYNCS, SubName: Full=Xanthine/uracil/vitamin C permease {ECO:0000313|EMBL:KVI10017.1};
TRINITY_DN105295_c0_g3	1123.37	5441.19	-2.28	2.12e-88	3.44e-86	down	GO:0048046,apoplast; GO:0005618,cell wall; GO:0033946,xyloglucan-specific endo-beta-1,4-glucanase activity; GO:0016762,xyloglucan:xyloglucosyl transferase activity; GO:0042546,cell wall biogenesis; GO:0071555,cell wall organization; GO:0010411,xyloglucan metabolic process	--	At4g14130	ref|XP_021993253.1|	XTH15_ARATH, RecName: Full=Xyloglucan endotransglucosylase/hydrolase protein 15 {ECO:0000303|PubMed:12514239}; Short=At-XTH15 {ECO:0000303|PubMed:12514239}; Short=XTH-15 {ECO:0000303|PubMed:12514239}; EC=2.4.1.207 {ECO:0000269|PubMed:25446234}; EC=3.2.1.151 {ECO:0000269|PubMed:25446234}; Flags: Precursor;	A0A251T955_HELAN, RecName: Full=Xyloglucan endotransglucosylase/hydrolase {ECO:0000256|RuleBase:RU361120}; EC=2.4.1.207 {ECO:0000256|RuleBase:RU361120};
TRINITY_DN91028_c0_g2	543.563	1299.48	-1.26	2.51e-88	4.06e-86	down	GO:0005789,endoplasmic reticulum membrane; GO:0016021,integral component of membrane; GO:0031090,organelle membrane; GO:0020037,heme binding; GO:0046872,metal ion binding; GO:0055114,oxidation-reduction process	K10534: NR; nitrate reductase (NAD(P)H) [EC:1.7.1.1 1.7.1.2 1.7.1.3]	At2g32720	gb|PLY88967.1|	CYB5_ORYSJ, RecName: Full=Cytochrome b5;	A8CI86_CREAL, SubName: Full=Cytochrome b5 type 06 {ECO:0000313|EMBL:ABA54489.1};
TRINITY_DN104085_c4_g4	1089.26	146.698	2.89	5.15e-88	8.29e-86	up	GO:0046872,metal ion binding; GO:0004722,protein serine/threonine phosphatase activity	--	At2g20630	gb|PLY69346.1|	P2C44_ORYSJ, RecName: Full=Probable protein phosphatase 2C 44; Short=OsPP2C44; EC=3.1.3.16;	A0A251V6N6_HELAN, SubName: Full=Uncharacterized protein {ECO:0000313|EMBL:OTG30786.1};
TRINITY_DN108227_c8_g3	2337.46	6154.89	-1.4	5.35e-87	8.58e-85	down	GO:0016157,sucrose synthase activity; GO:0005985,sucrose metabolic process	K00695: E2.4.1.13; sucrose synthase [EC:2.4.1.13]	At3g43190	gb|PLY95342.1|	SUS1_DAUCA, RecName: Full=Sucrose synthase isoform 1; EC=2.4.1.13; AltName: Full=Sucrose synthase isoform I; AltName: Full=Sucrose-UDP glucosyltransferase 1; AltName: Full=Susy*Dc1;	A0A103XNS0_CYNCS, RecName: Full=Sucrose synthase {ECO:0000256|RuleBase:RU280817}; EC=2.4.1.13 {ECO:0000256|RuleBase:RU280817};
TRINITY_DN102503_c2_g4	4853.49	2184.94	1.15	1.02e-86	1.63e-84	up	GO:0031225,anchored component of membrane; GO:0046658,anchored component of plasma membrane; GO:0005886,plasma membrane; GO:0005773,vacuole; GO:0009055,electron transfer activity; GO:0046872,metal ion binding; GO:0015690,aluminum cation transport; GO:0070417,cellular response to cold; GO:1901141,regulation of lignin biosynthetic process; GO:0009646,response to absence of light; GO:0002239,respons…	K04733: IRAK4; interleukin-1 receptor-associated kinase 4 [EC:2.7.11.1]	At5g20230	gb|KVH93796.1|	BCB1_ARATH, RecName: Full=Blue copper protein; AltName: Full=Blue copper-binding protein; Short=AtBCB; AltName: Full=Phytocyanin 1; AltName: Full=Stellacyanin; Flags: Precursor;	A0A103XMZ7_CYNCS, SubName: Full=Cupredoxin {ECO:0000313|EMBL:KVH93796.1}; Flags: Fragment;
TRINITY_DN105936_c1_g2	1145.58	91.8158	3.64	1.9e-86	3.04e-84	up	GO:0016021,integral component of membrane; GO:0005886,plasma membrane; GO:0015591,D-ribose transmembrane transporter activity; GO:0015148,D-xylose transmembrane transporter activity; GO:0005354,galactose transmembrane transporter activity; GO:0005355,glucose transmembrane transporter activity; GO:0015168,glycerol transmembrane transporter activity; GO:0015575,mannitol transmembrane transporter ac…	--	At3g18830	gb|KVH93239.1|	PLT5_ARATH, RecName: Full=Polyol transporter 5; AltName: Full=Protein POLYOL TRANSPORTER 5; Short=AtPLT5; AltName: Full=Sugar-proton symporter PLT5;	A0A103XMJ5_CYNCS, SubName: Full=General substrate transporter {ECO:0000313|EMBL:KVH93239.1}; Flags: Fragment;
TRINITY_DN100605_c1_g1	664.863	41.1725	4.01	2.29e-86	3.64e-84	up	--	K01937: pyrG, CTPS; CTP synthase [EC:6.3.4.2]	At3g12670	gb|KVI03213.1|	--	A0A124SFH2_CYNCS, RecName: Full=CTP synthase {ECO:0000256|RuleBase:RU810713}; EC=6.3.4.2 {ECO:0000256|RuleBase:RU810713}; AltName: Full=UTP--ammonia ligase {ECO:0000256|RuleBase:RU810713};
TRINITY_DN107803_c0_g1	29.3019	23128.2	-9.63	3.72e-86	5.9e-84	down	GO:0005576,extracellular region; GO:0016788,hydrolase activity, acting on ester bonds; GO:0016042,lipid catabolic process	--	At1g74460	gb|PLY94971.1|	GDL31_ARATH, RecName: Full=GDSL esterase/lipase At1g74460; EC=3.1.1.-; AltName: Full=Extracellular lipase At1g74460; Flags: Precursor;	A0A251TKD7_HELAN, SubName: Full=Putative SGNH hydrolase-type esterase domain-containing protein {ECO:0000313|EMBL:OTG11588.1};
TRINITY_DN98876_c0_g5	796.223	1752.09	-1.14	4.98e-86	7.87e-84	down	--	--	At4g03260	gb|KVH95941.1|	--	A0A103XS92_CYNCS, SubName: Full=Uncharacterized protein {ECO:0000313|EMBL:KVH95941.1};
TRINITY_DN107251_c2_g2	6006.44	243.655	4.62	5.04e-86	7.94e-84	up	GO:0048046,apoplast; GO:0005618,cell wall; GO:0005829,cytosol; GO:0005794,Golgi apparatus; GO:0009505,plant-type cell wall; GO:0005774,vacuolar membrane; GO:0030246,carbohydrate binding	K04733: IRAK4; interleukin-1 receptor-associated kinase 4 [EC:2.7.11.1]	At1g78850	ref|XP_022021809.1|	EP1L3_ARATH, RecName: Full=EP1-like glycoprotein 3 {ECO:0000303|PubMed:15276441}; AltName: Full=Curculin-like (Mannose-binding) lectin family protein {ECO:0000303|PubMed:23738689}; AltName: Full=Putative receptor-like protein kinase-like protein {ECO:0000303|PubMed:12833529}; Flags: Precursor;	A0A124SHS5_CYNCS, SubName: Full=Uncharacterized protein {ECO:0000313|EMBL:KVI10458.1};
TRINITY_DN105622_c0_g1	834.93	10533.6	-3.66	6.1e-86	9.57e-84	down	GO:0005737,cytoplasm; GO:0005886,plasma membrane; GO:0090406,pollen tube; GO:0005509,calcium ion binding; GO:0019900,kinase binding; GO:0009738,abscisic acid-activated signaling pathway; GO:0019722,calcium-mediated signaling; GO:0009860,pollen tube growth; GO:0009409,response to cold; GO:0006970,response to osmotic stress; GO:0009651,response to salt stress; GO:0009414,response to water deprivati…	K06268: PPP3R, CNB; serine/threonine-protein phosphatase 2B regulatory subunit	At5g47100	gb|KVH95232.1|	CNBL1_ARATH, RecName: Full=Calcineurin B-like protein 1; AltName: Full=SOS3-like calcium-binding protein 5;	A0A118JWX8_CYNCS, SubName: Full=Calcium-binding EF-hand {ECO:0000313|EMBL:KVH95232.1};
TRINITY_DN106191_c1_g1	51791	5670.72	3.19	1.18e-85	1.85e-83	up	GO:0006952,defense response; GO:0009607,response to biotic stimulus	--	--	gb|KVH96457.1|	RAP_TAROF, RecName: Full=Root allergen protein; Short=RAP;	A0A118JWU3_CYNCS, SubName: Full=Bet v I domain-containing protein {ECO:0000313|EMBL:KVH96457.1};
TRINITY_DN106880_c1_g3	57.5117	576.118	-3.32	2.76e-85	4.3e-83	down	GO:0005794,Golgi apparatus; GO:0016021,integral component of membrane; GO:0016413,O-acetyltransferase activity; GO:0071554,cell wall organization or biogenesis	--	At1g29050	gb|KVH96779.1|	TBL38_ARATH, RecName: Full=Protein trichome birefringence-like 38;	A0A103XTW1_CYNCS, SubName: Full=PC-Esterase {ECO:0000313|EMBL:KVH96779.1};
TRINITY_DN100678_c2_g2	51.6909	1544.43	-4.9	3.22e-85	5.01e-83	down	GO:0005737,cytoplasm; GO:0005856,cytoskeleton; GO:0005524,ATP binding	--	At2g37620	ref|XP_022036108.1|	ACT_GOSHI, RecName: Full=Actin;	A0A118K7E4_CYNCS, SubName: Full=Actin/actin-like conserved site-containing protein {ECO:0000313|EMBL:KVI12093.1};
TRINITY_DN104719_c2_g1	145.132	581.591	-2	6.22e-85	9.65e-83	down	GO:0005768,endosome; GO:0005794,Golgi apparatus; GO:0000139,Golgi membrane; GO:0016021,integral component of membrane; GO:0005802,trans-Golgi network; GO:0017095,heparan sulfate 6-O-sulfotransferase activity; GO:0008476,protein-tyrosine sulfotransferase activity; GO:0055070,copper ion homeostasis; GO:0015015,heparan sulfate proteoglycan biosynthetic process, enzymatic modification; GO:0045087,inn…	--	--	gb|KVI00185.1|	TPST_ARATH, RecName: Full=Protein-tyrosine sulfotransferase; EC=2.8.2.20 {ECO:0000269|PubMed:19666544}; AltName: Full=Tyrosylprotein sulfotransferase; Flags: Precursor;	A0A103Y0C2_CYNCS, SubName: Full=Uncharacterized protein {ECO:0000313|EMBL:KVI00185.1};
TRINITY_DN95726_c1_g6	1917.06	8.67311	7.78	8.61e-85	1.33e-82	up	GO:0005576,extracellular region; GO:0020037,heme binding; GO:0046872,metal ion binding; GO:0004601,peroxidase activity; GO:0042744,hydrogen peroxide catabolic process; GO:0006979,response to oxidative stress	K00430: E1.11.1.7; peroxidase [EC:1.11.1.7]	At5g64120	gb|KVH88227.1|	PERN1_TOBAC, RecName: Full=Peroxidase N1; EC=1.11.1.7; AltName: Full=Peroxidase B2; AltName: Full=Peroxidase B3; Flags: Precursor;	A0A124SAQ4_CYNCS, RecName: Full=Peroxidase {ECO:0000256|RuleBase:RU362060, ECO:0000256|SAAS:SAAS00709852}; EC=1.11.1.7 {ECO:0000256|RuleBase:RU362060, ECO:0000256|SAAS:SAAS00709852};
TRINITY_DN99409_c1_g7	321.694	1969.76	-2.62	1.05e-84	1.61e-82	down	--	--	--	--	--	--
TRINITY_DN103999_c5_g1	256.764	3723.44	-3.86	1.64e-84	2.53e-82	down	GO:0004013,adenosylhomocysteinase activity; GO:0051287,NAD binding; GO:0006730,one-carbon metabolic process; GO:0019510,S-adenosylhomocysteine catabolic process	K01251: E3.3.1.1, ahcY; adenosylhomocysteinase [EC:3.3.1.1]	At4g13940	gb|PLY85653.1|	SAHH_PETCR, RecName: Full=Adenosylhomocysteinase; Short=AdoHcyase; EC=3.3.1.1; AltName: Full=S-adenosyl-L-homocysteine hydrolase;	A0A251SAA5_HELAN, RecName: Full=Adenosylhomocysteinase {ECO:0000256|RuleBase:RU000548}; EC=3.3.1.1 {ECO:0000256|RuleBase:RU000548};
TRINITY_DN99953_c2_g1	870.033	316.017	1.46	2.15e-84	3.29e-82	up	GO:0047037,salutaridine reductase (NADPH) activity; GO:0009820,alkaloid metabolic process	K15095: E1.1.1.208; (+)-neomenthol dehydrogenase [EC:1.1.1.208]	At3g61220	ref|XP_022021293.1|	SALR_PAPBR, RecName: Full=Salutaridine reductase {ECO:0000312|EMBL:ABO93462.1}; EC=1.1.1.248;	A0A251RL71_HELAN, SubName: Full=Putative glucose/ribitol dehydrogenase {ECO:0000313|EMBL:OTF85183.1};
TRINITY_DN99130_c1_g7	26.3664	470.984	-4.16	2.18e-84	3.34e-82	down	GO:0005829,cytosol; GO:0005886,plasma membrane; GO:0009904,chloroplast accumulation movement; GO:0009903,chloroplast avoidance movement	--	At2g26570	gb|KVH99437.1|	WEB1_ARATH, RecName: Full=Protein WEAK CHLOROPLAST MOVEMENT UNDER BLUE LIGHT 1; Short=Protein WEB1;	A0A103XYU7_CYNCS, SubName: Full=Uncharacterized protein {ECO:0000313|EMBL:KVH99437.1};
TRINITY_DN97701_c4_g1	165.003	3258.14	-4.3	2.63e-84	4e-82	down	--	--	At5g42560	gb|KVI07295.1|	HA22I_ARATH, RecName: Full=HVA22-like protein i; Short=AtHVA22i;	A0A103YDW5_CYNCS, RecName: Full=HVA22-like protein {ECO:0000256|RuleBase:RU362006}; Flags: Fragment;
TRINITY_DN104434_c1_g4	2025.43	4531.07	-1.16	3.97e-84	6.04e-82	down	--	--	--	--	--	--
TRINITY_DN107822_c2_g1	4498.5	1731.08	1.38	6.4e-84	9.69e-82	up	GO:0005576,extracellular region; GO:0016788,hydrolase activity, acting on ester bonds; GO:0016042,lipid catabolic process	K00826: E2.6.1.42, ilvE; branched-chain amino acid aminotransferase [EC:2.6.1.42]	At4g01130	gb|PLY75810.1|	GDL61_ARATH, RecName: Full=GDSL esterase/lipase At4g01130; EC=3.1.1.-; AltName: Full=Extracellular lipase At4g01130; Flags: Precursor;	A0A251UH17_HELAN, SubName: Full=Putative GDSL-like Lipase/Acylhydrolase superfamily protein {ECO:0000313|EMBL:OTG22343.1};
TRINITY_DN99022_c1_g1	969.536	331.016	1.55	1.27e-83	1.92e-81	up	GO:0009507,chloroplast; GO:0009534,chloroplast thylakoid; GO:0009535,chloroplast thylakoid membrane; GO:0016021,integral component of membrane; GO:0009579,thylakoid; GO:0042802,identical protein binding; GO:0016730,oxidoreductase activity, acting on iron-sulfur proteins as donors; GO:0019904,protein domain specific binding; GO:0015979,photosynthesis; GO:0009773,photosynthetic electron transport i…	--	At4g22890	gb|KVH91704.1|	PGL1A_ARATH, RecName: Full=PGR5-like protein 1A, chloroplastic; AltName: Full=Ferredoxin-plastoquinone reductase 1; Flags: Precursor;	A0A118JU98_CYNCS, SubName: Full=Uncharacterized protein {ECO:0000313|EMBL:KVH91704.1}; Flags: Fragment;
TRINITY_DN98266_c0_g2	1583.01	166.021	3.25	2.27e-83	3.41e-81	up	GO:0016021,integral component of membrane	--	At1g14870	gb|PLY82891.1|	CNR10_MAIZE, RecName: Full=Cell number regulator 10; AltName: Full=ZmCNR10;	A0A251T3Y7_HELAN, SubName: Full=Putative PLAC8 motif-containing protein {ECO:0000313|EMBL:OTG05808.1};
TRINITY_DN102202_c0_g4	574.07	4019.83	-2.81	6.63e-83	9.95e-81	down	GO:0009570,chloroplast stroma; GO:0009535,chloroplast thylakoid membrane; GO:0045549,9-cis-epoxycarotenoid dioxygenase activity; GO:0046872,metal ion binding; GO:0009688,abscisic acid biosynthetic process; GO:0042538,hyperosmotic salinity response; GO:0006970,response to osmotic stress; GO:0009414,response to water deprivation	K09840: NCED; 9-cis-epoxycarotenoid dioxygenase [EC:1.13.11.51]	At3g14440	gb|KVI10563.1|	NCED3_ARATH, RecName: Full=9-cis-epoxycarotenoid dioxygenase NCED3, chloroplastic; Short=AtNCED3; EC=1.13.11.51; AltName: Full=Protein SALT TOLERANT 1; Flags: Precursor;	A0A118K6F5_CYNCS, SubName: Full=Carotenoid oxygenase {ECO:0000313|EMBL:KVI10563.1};
TRINITY_DN102169_c2_g1	822.914	12.9088	6.01	1.1e-82	1.65e-80	up	--	--	--	gb|POE88321.1|	--	A0A1D1Z6L5_9ARAE, SubName: Full=Glucose-repressible gene protein {ECO:0000313|EMBL:JAT62563.1}; Flags: Fragment;
TRINITY_DN108243_c3_g1	2191.65	1049.24	1.06	1.84e-82	2.74e-80	up	GO:0016021,integral component of membrane; GO:0020037,heme binding; GO:0005506,iron ion binding; GO:0004497,monooxygenase activity; GO:0016705,oxidoreductase activity, acting on paired donors, with incorporation or reduction of molecular oxygen	K07425: CYP4A; long-chain fatty acid omega-monooxygenase [EC:1.14.14.80]	At3g14690	gb|KVI05232.1|	C7A29_PANGI, RecName: Full=Cytochrome P450 CYP72A219; EC=1.14.-.-; AltName: Full=Cytochrome P450 CYP72A129;	A0A103Y9Y5_CYNCS, SubName: Full=Cytochrome P450 {ECO:0000313|EMBL:KVI05232.1};
TRINITY_DN105561_c0_g1	106.694	1299.9	-3.61	2.87e-82	4.27e-80	down	--	--	--	--	--	--
TRINITY_DN97648_c1_g6	19.2305	365.508	-4.25	3.09e-82	4.58e-80	down	GO:0005905,clathrin-coated pit; GO:0030136,clathrin-coated vesicle; GO:0005794,Golgi apparatus; GO:0005545,1-phosphatidylinositol binding; GO:0030276,clathrin binding; GO:0048268,clathrin coat assembly; GO:0006897,endocytosis	--	At1g03050	gb|KVH93446.1|	CAP4_ARATH, RecName: Full=Putative clathrin assembly protein At1g03050;	A0A124SCD4_CYNCS, SubName: Full=AP180 N-terminal homology (ANTH) domain-containing protein {ECO:0000313|EMBL:KVH93446.1};
TRINITY_DN100628_c0_g1	698.075	2169.75	-1.64	3.39e-82	5.01e-80	down	GO:0005634,nucleus; GO:0009734,auxin-activated signaling pathway; GO:0006355,regulation of transcription, DNA-templated; GO:0006351,transcription, DNA-templated	K14484: IAA; auxin-responsive protein IAA	At1g04240	gb|PLY97187.1|	IAA4_PEA, RecName: Full=Auxin-induced protein IAA4;	A0A124SAJ9_CYNCS, RecName: Full=Auxin-responsive protein {ECO:0000256|RuleBase:RU004549};
TRINITY_DN99518_c5_g1	57.3212	454.525	-2.99	3.55e-82	5.23e-80	down	GO:0030136,clathrin-coated vesicle; GO:0005794,Golgi apparatus; GO:0015031,protein transport	K12471: EPN; epsin	At3g46540	gb|KVI06942.1|	EPN3_ARATH, RecName: Full=Clathrin interactor EPSIN 3; AltName: Full=EPSIN-related 3;	A0A103YD77_CYNCS, SubName: Full=ENTH/VHS-like protein {ECO:0000313|EMBL:KVI06942.1};
TRINITY_DN105129_c0_g1	651.766	40.2775	4.02	6.22e-82	9.15e-80	up	--	--	At2g39210	gb|KVI05031.1|	--	A0A103Y9J3_CYNCS, SubName: Full=Major facilitator superfamily {ECO:0000313|EMBL:KVI05031.1};
TRINITY_DN98237_c1_g2	213.472	980.164	-2.2	7.88e-82	1.16e-79	down	--	--	--	--	--	--
TRINITY_DN106348_c4_g7	3594.75	399.051	3.17	1.18e-81	1.72e-79	up	GO:0009570,chloroplast stroma; GO:0009534,chloroplast thylakoid; GO:0016165,linoleate 13S-lipoxygenase activity; GO:0046872,metal ion binding; GO:0010597,green leaf volatile biosynthetic process; GO:0031408,oxylipin biosynthetic process	K00454: LOX2S; lipoxygenase [EC:1.13.11.12]	At3g45140	gb|KVH90897.1|	LOX21_SOLTU, RecName: Full=Linoleate 13S-lipoxygenase 2-1, chloroplastic; EC=1.13.11.12; AltName: Full=Lipoxygenase 2-1; Flags: Precursor;	A0A118JUA2_CYNCS, RecName: Full=Lipoxygenase {ECO:0000256|RuleBase:RU003975}; EC=1.13.11.- {ECO:0000256|RuleBase:RU003975}; Flags: Fragment;
TRINITY_DN100161_c2_g1	2105.01	264.656	2.99	1.39e-81	2.03e-79	up	GO:0016021,integral component of membrane; GO:0005886,plasma membrane; GO:0042936,NA; GO:0022857,transmembrane transporter activity; GO:0042938,dipeptide transport; GO:0009860,pollen tube growth; GO:0015031,protein transport	--	At5g01180	gb|PLY65561.1|	PTR5_ARATH, RecName: Full=Protein NRT1/ PTR FAMILY 8.2; Short=AtNPF8.2; AltName: Full=Peptide transporter PTR5;	A0A118JW13_CYNCS, SubName: Full=Major facilitator superfamily domain, general substrate transporter {ECO:0000313|EMBL:KVH94674.1}; Flags: Fragment;
TRINITY_DN97089_c0_g1	935.37	9692.76	-3.37	2.13e-81	3.1e-79	down	--	--	--	gb|PLY71950.1|	--	A0A068UXJ4_COFCA, SubName: Full=Uncharacterized protein {ECO:0000313|EMBL:CDP13027.1};
TRINITY_DN95004_c2_g1	906.815	72.1609	3.65	2.22e-81	3.22e-79	up	GO:0005829,cytosol; GO:0005634,nucleus; GO:0005886,plasma membrane; GO:0005096,GTPase activator activity; GO:0046872,metal ion binding; GO:0005543,phospholipid binding; GO:0009738,abscisic acid-activated signaling pathway; GO:0006952,defense response; GO:0009789,positive regulation of abscisic acid-activated signaling pathway; GO:1902479,positive regulation of defense response to bacterium, incom…	--	At3g17980	gb|KVH92391.1|	CAR4_ARATH, RecName: Full=Protein C2-DOMAIN ABA-RELATED 4 {ECO:0000303|PubMed:25465408}; AltName: Full=C2 domain-containing protein; Short=AtC2; AltName: Full=GTPase activating protein 1 {ECO:0000303|PubMed:23550829}; Short=AtGAP1 {ECO:0000303|PubMed:23550829};	A0A103XKE6_CYNCS, SubName: Full=C2 calcium-dependent membrane targeting {ECO:0000313|EMBL:KVH92391.1};
TRINITY_DN100601_c0_g3	224.325	805.923	-1.85	3.22e-81	4.65e-79	down	GO:0005737,cytoplasm; GO:0005634,nucleus; GO:0005886,plasma membrane; GO:0005524,ATP binding; GO:0005509,calcium ion binding; GO:0009931,calcium-dependent protein serine/threonine kinase activity; GO:0005516,calmodulin binding; GO:0004683,calmodulin-dependent protein kinase activity; GO:0009738,abscisic acid-activated signaling pathway; GO:0035556,intracellular signal transduction; GO:0018105,pep…	K13412: CPK; calcium-dependent protein kinase [EC:2.7.11.1]	At1g50700	gb|KVI10335.1|	CDPKX_ARATH, RecName: Full=Calcium-dependent protein kinase 33 {ECO:0000303|PubMed:12068094, ECO:0000303|PubMed:12805596, ECO:0000303|Ref.5}; EC=2.7.11.1 {ECO:0000305};	A0A118K697_CYNCS, SubName: Full=Uncharacterized protein {ECO:0000313|EMBL:KVI10335.1};
TRINITY_DN100385_c1_g5	133.777	913.097	-2.77	3.96e-81	5.71e-79	down	--	--	At1g20460	ref|XP_022006816.1|	--	A0A251SE38_HELAN, SubName: Full=Uncharacterized protein {ECO:0000313|EMBL:OTF96908.1};
TRINITY_DN105096_c3_g3	13.0232	450.753	-5.13	4.2e-81	6.04e-79	down	--	--	At4g02370	gb|PLY97811.1|	--	A0A103XPB3_CYNCS, SubName: Full=Uncharacterized protein {ECO:0000313|EMBL:KVH94486.1};
TRINITY_DN96939_c2_g1	712.561	123.356	2.53	4.45e-81	6.38e-79	up	GO:0004190,aspartic-type endopeptidase activity; GO:0004519,endonuclease activity; GO:0046872,metal ion binding; GO:0003676,nucleic acid binding; GO:0003964,RNA-directed DNA polymerase activity; GO:0015074,DNA integration; GO:0006310,DNA recombination	--	At4g02960	ref|XP_021742700.1|	POLR2_ARATH, RecName: Full=Retrovirus-related Pol polyprotein from transposon RE2; AltName: Full=Retro element 2 {ECO:0000303|PubMed:10689195}; Short=AtRE2 {ECO:0000303|PubMed:10689195}; Includes: RecName: Full=Protease RE2; EC=3.4.23.-; Includes: RecName: Full=Reverse transcriptase RE2; EC=2.7.7.49; Includes: RecName: Full=Endonuclease RE2;	A0A0B2RKI2_GLYSO, SubName: Full=Uncharacterized protein {ECO:0000313|EMBL:KHN32824.1};
TRINITY_DN104241_c2_g2	5005.4	359.505	3.8	7.27e-81	1.04e-78	up	GO:0016021,integral component of membrane; GO:0016846,carbon-sulfur lyase activity; GO:0008483,transaminase activity	K16903: TAA1; L-tryptophan---pyruvate aminotransferase [EC:2.6.1.99]	At1g34060_2	ref|XP_022000100.1|	TAR4_ARATH, RecName: Full=Tryptophan aminotransferase-related protein 4; EC=2.6.1.-;	A0A251SSJ5_HELAN, SubName: Full=Putative pyridoxal phosphate-dependent transferase {ECO:0000313|EMBL:OTG00501.1};
TRINITY_DN103356_c0_g1	933.729	192.489	2.28	1.08e-80	1.54e-78	up	GO:0009507,chloroplast; GO:0008199,ferric iron binding; GO:0004322,ferroxidase activity; GO:0006879,cellular iron ion homeostasis; GO:0006826,iron ion transport	K00522: FTH1; ferritin heavy chain [EC:1.16.3.2]	At2g40300	gb|PLY88259.1|	FRI1_BRANA, RecName: Full=Ferritin-1, chloroplastic; EC=1.16.3.1; Flags: Precursor;	A0A103YLQ3_CYNCS, RecName: Full=Ferritin {ECO:0000256|RuleBase:RU361145}; EC=1.16.3.1 {ECO:0000256|RuleBase:RU361145};
TRINITY_DN95647_c1_g1	191.436	2197.24	-3.52	1.16e-80	1.65e-78	down	--	--	At1g08790	gb|KVH97323.1|	--	A0A103XUU4_CYNCS, SubName: Full=Uncharacterized protein {ECO:0000313|EMBL:KVH97323.1};
TRINITY_DN99616_c4_g6	32.1568	452.283	-3.82	1.36e-80	1.92e-78	down	--	K18081: MTMR1_2; myotubularin-related protein 1/2 [EC:3.1.3.64 3.1.3.95]	At3g23160	gb|KVH95009.1|	--	A0A103XQM4_CYNCS, SubName: Full=Uncharacterized protein {ECO:0000313|EMBL:KVH95009.1};
TRINITY_DN104780_c2_g2	1401.63	46.5411	4.91	2.33e-80	3.3e-78	up	GO:0005618,cell wall; GO:0005576,extracellular region; GO:0009505,plant-type cell wall; GO:0030246,carbohydrate binding	K04733: IRAK4; interleukin-1 receptor-associated kinase 4 [EC:2.7.11.1]	At1g78860	gb|KVI05266.1|	EP1L4_ARATH, RecName: Full=EP1-like glycoprotein 4 {ECO:0000305}; AltName: Full=Curculin-like (Mannose-binding) lectin family protein {ECO:0000303|PubMed:23738689}; Flags: Precursor;	A0A118K315_CYNCS, SubName: Full=Bulb-type lectin domain-containing protein {ECO:0000313|EMBL:KVI05266.1}; Flags: Fragment;
TRINITY_DN99539_c0_g1	1230.01	42.3903	4.85	1.1e-79	1.55e-77	up	--	--	--	--	--	--
TRINITY_DN97015_c0_g1	44.5555	378.902	-3.09	1.47e-79	2.06e-77	down	GO:0030659,cytoplasmic vesicle membrane	--	At4g32070	gb|KVI11687.1|	PHOX1_ARATH, RecName: Full=Protein PHOX1 {ECO:0000303|PubMed:20856808}; AltName: Full=Protein MADB1 {ECO:0000303|PubMed:28096376}; AltName: Full=Putative myosin adapter B1 {ECO:0000303|PubMed:28096376};	A0A118K760_CYNCS, SubName: Full=Phox/Bem1p {ECO:0000313|EMBL:KVI11687.1};
TRINITY_DN105784_c2_g2	97.131	544.204	-2.48	1.66e-79	2.33e-77	down	GO:0005634,nucleus; GO:0005516,calmodulin binding; GO:0003700,DNA binding transcription factor activity; GO:0043565,sequence-specific DNA binding; GO:0001077,transcriptional activator activity, RNA polymerase II proximal promoter sequence-specific DNA binding; GO:0070417,cellular response to cold; GO:0045944,positive regulation of transcription by RNA polymerase II; GO:0006355,regulation of trans…	--	At3g16940	gb|KVH88165.1|	CMTA5_ARATH, RecName: Full=Calmodulin-binding transcription activator 5 {ECO:0000303|PubMed:11925432}; Short=AtCAMTA5 {ECO:0000303|PubMed:11925432}; AltName: Full=Ethylene-induced calmodulin-binding protein f {ECO:0000303|PubMed:11782485}; Short=EICBP.f {ECO:0000303|PubMed:11782485}; AltName: Full=Signal-responsive protein 6 {ECO:0000303|PubMed:12218065}; Short=AtSR6 {ECO:0000303|PubMed:12218065};	A0A118JSK7_CYNCS, SubName: Full=Ankyrin repeat-containing protein {ECO:0000313|EMBL:KVH88165.1};
TRINITY_DN96862_c2_g3	1922.45	363.965	2.4	1.97e-79	2.76e-77	up	GO:0004364,glutathione transferase activity	K00799: GST, gst; glutathione S-transferase [EC:2.5.1.18]	At1g02930	gb|KVI12466.1|	GSTF1_TOBAC, RecName: Full=Glutathione S-transferase PARB; EC=2.5.1.18; AltName: Full=GST class-phi;	A0A118K7M4_CYNCS, SubName: Full=Glutathione S-transferase/chloride channel, C-terminal {ECO:0000313|EMBL:KVI12466.1};
TRINITY_DN98845_c1_g2	1224.94	545.265	1.17	2.25e-79	3.14e-77	up	GO:0016021,integral component of membrane; GO:0005886,plasma membrane; GO:0005524,ATP binding; GO:0008061,chitin binding; GO:0042803,protein homodimerization activity; GO:0004675,transmembrane receptor protein serine/threonine kinase activity; GO:0007166,cell surface receptor signaling pathway; GO:0071323,cellular response to chitin; GO:0045087,innate immune response; GO:0006468,protein phosphory…	K04733: IRAK4; interleukin-1 receptor-associated kinase 4 [EC:2.7.11.1]	At2g33580	gb|KVI05117.1|	LYK5_ARATH, RecName: Full=Protein LYK5; AltName: Full=LysM domain receptor-like kinase 5; AltName: Full=LysM-containing receptor-like kinase 5; Flags: Precursor;	A0A118K2Y7_CYNCS, SubName: Full=Concanavalin A-like lectin/glucanase, subgroup {ECO:0000313|EMBL:KVI05117.1};
TRINITY_DN87832_c0_g2	152.27	638.207	-2.07	4.89e-79	6.81e-77	down	GO:0005634,nucleus; GO:0004860,protein kinase inhibitor activity; GO:0007049,cell cycle	--	At5g02420	gb|PLY93045.1|	SMR3_ARATH, RecName: Full=Cyclin-dependent protein kinase inhibitor SMR3 {ECO:0000303|PubMed:24399300, ECO:0000303|PubMed:26546445}; AltName: Full=Protein SIAMESE-RELATED 3 {ECO:0000303|PubMed:24399300, ECO:0000303|PubMed:26546445};	A0A1U8MAZ0_GOSHI, SubName: Full=cyclin-dependent protein kinase inhibitor SMR3-like {ECO:0000313|RefSeq:XP_016724006.1};
TRINITY_DN105025_c5_g4	294.143	1744.65	-2.57	6.88e-79	9.53e-77	down	GO:0005576,extracellular region; GO:0009505,plant-type cell wall; GO:0052793,pectin acetylesterase activity; GO:0071555,cell wall organization	K19882: NOTUM; O-palmitoleoyl-L-serine hydrolase [EC:3.1.1.98]	At5g45280	ref|XP_022029109.1|	PAE8_ARATH, RecName: Full=Pectin acetylesterase 8 {ECO:0000303|PubMed:25115560}; EC=3.1.1.- {ECO:0000305}; Flags: Precursor;	A0A251VA39_HELAN, RecName: Full=Pectin acetylesterase {ECO:0000256|RuleBase:RU363114}; EC=3.1.1.- {ECO:0000256|RuleBase:RU363114};
TRINITY_DN108088_c4_g7	3576.8	451.291	2.99	1.17e-78	1.62e-76	up	GO:0009507,chloroplast; GO:0009570,chloroplast stroma; GO:0005634,nucleus; GO:0009536,plastid	--	At4g36040	gb|KVI07796.1|	DNJ11_ARATH, RecName: Full=Chaperone protein dnaJ 11, chloroplastic; Short=AtDjC11; Short=AtJ11; Flags: Precursor;	A0A103YEV1_CYNCS, SubName: Full=DnaJ domain-containing protein {ECO:0000313|EMBL:KVI07796.1};
TRINITY_DN96382_c1_g1	613.149	124.431	2.3	1.61e-78	2.22e-76	up	GO:0005887,integral component of plasma membrane; GO:0005886,plasma membrane; GO:0005516,calmodulin binding; GO:0030552,cAMP binding; GO:0030553,cGMP binding; GO:0005216,ion channel activity; GO:0042391,regulation of membrane potential	K05391: CNGC; cyclic nucleotide gated channel, plant	At5g53130	gb|KVH91106.1|	CNGC1_ARATH, RecName: Full=Cyclic nucleotide-gated ion channel 1; Short=AtCNGC1; AltName: Full=Cyclic nucleotide- and calmodulin-regulated ion channel 1;	A0A124SBM3_CYNCS, SubName: Full=Cyclic nucleotide-binding domain-containing protein {ECO:0000313|EMBL:KVH91106.1};
TRINITY_DN97546_c0_g1	894.209	4.77316	7.57	3.2e-78	4.39e-76	up	--	--	At2g15220	gb|KVI01887.1|	--	A0A103Y3L1_CYNCS, SubName: Full=Uncharacterized protein {ECO:0000313|EMBL:KVI01887.1};
TRINITY_DN100263_c0_g2	128.359	10399.8	-6.34	4.23e-78	5.79e-76	down	GO:0005618,cell wall; GO:0009707,chloroplast outer membrane; GO:0005783,endoplasmic reticulum; GO:0005576,extracellular region; GO:0009506,plasmodesma; GO:0050832,defense response to fungus	--	At4g12490	gb|PIA50105.1|	ERLL2_ARATH, RecName: Full=pEARLI1-like lipid transfer protein 2; Flags: Precursor;	A0A2G5E2Y0_AQUCA, SubName: Full=Uncharacterized protein {ECO:0000313|EMBL:PIA50105.1};
TRINITY_DN95907_c0_g2	552.36	76.5818	2.85	6.32e-78	8.63e-76	up	--	--	At5g56550	ref|XP_021984421.1|	--	A0A103YBA9_CYNCS, SubName: Full=Uncharacterized protein {ECO:0000313|EMBL:KVI05931.1};
TRINITY_DN101555_c2_g3	40.8483	3761.22	-6.53	7.01e-78	9.55e-76	down	GO:0048046,apoplast; GO:0005618,cell wall; GO:0004553,hydrolase activity, hydrolyzing O-glycosyl compounds; GO:0016762,xyloglucan:xyloglucosyl transferase activity; GO:0042546,cell wall biogenesis; GO:0071555,cell wall organization; GO:0010411,xyloglucan metabolic process	--	At4g13090	ref|XP_021984817.1|	XTH2_ARATH, RecName: Full=Xyloglucan endotransglucosylase/hydrolase protein 2; Short=At-XTH2; Short=XTH-2; EC=2.4.1.207; Flags: Precursor;	A0A251UAV1_HELAN, SubName: Full=Putative beta-glucanase {ECO:0000313|EMBL:OTG20465.1};
TRINITY_DN107993_c8_g3	792.981	160.475	2.31	1.32e-77	1.8e-75	up	GO:0016021,integral component of membrane; GO:0005886,plasma membrane; GO:0005524,ATP binding; GO:0008553,proton-exporting ATPase activity, phosphorylative mechanism; GO:0046872,metal ion binding; GO:0006754,ATP biosynthetic process	K01535: PMA1, PMA2; H+-transporting ATPase [EC:3.6.3.6]	At4g30190	gb|PLY84328.1|	PMA1_ORYSJ, RecName: Full=Plasma membrane ATPase; EC=3.6.3.6; AltName: Full=Proton pump;	A0A251SYZ3_HELAN, RecName: Full=Plasma membrane ATPase {ECO:0000256|RuleBase:RU362083}; EC=3.6.3.6 {ECO:0000256|RuleBase:RU362083};
TRINITY_DN99153_c2_g1	2710.32	834.39	1.7	1.75e-77	2.37e-75	up	--	--	--	--	--	--
TRINITY_DN90499_c0_g1	962.028	78.3354	3.61	2.27e-77	3.07e-75	up	GO:0016021,integral component of membrane; GO:0005886,plasma membrane; GO:0005524,ATP binding; GO:0004674,protein serine/threonine kinase activity	--	At5g25930	gb|KVI11561.1|	HSL1_ARATH, RecName: Full=Receptor-like protein kinase HSL1; EC=2.7.11.1; AltName: Full=Protein HAESA-LIKE1; Flags: Precursor;	A0A103YLV7_CYNCS, SubName: Full=Leucine-rich repeat-containing protein {ECO:0000313|EMBL:KVI11561.1};
TRINITY_DN102211_c0_g2	762.907	10196.6	-3.74	2.33e-77	3.14e-75	down	GO:0005737,cytoplasm; GO:0005856,cytoskeleton; GO:0051015,actin filament binding; GO:0046872,metal ion binding; GO:0051017,actin filament bundle assembly	--	At2g45800	ref|XP_011091917.1|	PLI2C_ARATH, RecName: Full=LIM domain-containing protein PLIM2c {ECO:0000305}; AltName: Full=Pollen-expressed LIM protein 2C {ECO:0000305};	A0A1U8EMQ2_CAPAN, SubName: Full=LIM domain-containing protein PLIM2b-like isoform X2 {ECO:0000313|RefSeq:XP_016544640.1};
TRINITY_DN100397_c7_g2	43.4591	484.647	-3.48	3.48e-77	4.67e-75	down	GO:0005886,plasma membrane; GO:0005524,ATP binding; GO:0004675,transmembrane receptor protein serine/threonine kinase activity; GO:0007166,cell surface receptor signaling pathway; GO:0006468,protein phosphorylation	K04733: IRAK4; interleukin-1 receptor-associated kinase 4 [EC:2.7.11.1]	At5g37790	gb|PLY92942.1|	Y5576_ARATH, RecName: Full=Probable receptor-like serine/threonine-protein kinase At5g57670; EC=2.7.11.1;	A0A103Y5D2_CYNCS, SubName: Full=Concanavalin A-like lectin/glucanase, subgroup {ECO:0000313|EMBL:KVI02825.1};
TRINITY_DN108224_c1_g2	475.001	4579.18	-3.27	5.23e-77	7.02e-75	down	--	--	At5g61260	gb|PLY81758.1|	--	A0A1U7WPE0_NICSY, SubName: Full=TNF receptor-associated factor family protein DDB_G0272098-like {ECO:0000313|RefSeq:XP_009779171.1};
TRINITY_DN99297_c5_g1	760.069	33.9417	4.49	6.48e-77	8.66e-75	up	--	--	At3g48410	gb|PLY90883.1|	--	A0A251VS64_HELAN, SubName: Full=Putative alpha/Beta hydrolase fold protein {ECO:0000313|EMBL:OTG38388.1};
TRINITY_DN108343_c3_g1	189.758	118789	-9.29	6.89e-77	9.19e-75	down	GO:0031225,anchored component of membrane; GO:0031012,extracellular matrix; GO:0005886,plasma membrane; GO:0004222,metalloendopeptidase activity; GO:0008270,zinc ion binding	--	At1g59970	gb|KVH92768.1|	5MMP_ARATH, RecName: Full=Metalloendoproteinase 5-MMP {ECO:0000303|PubMed:10574937}; Short=At5-MMP {ECO:0000303|PubMed:10574937}; EC=3.4.24.- {ECO:0000305}; Flags: Precursor;	A0A103XLB1_CYNCS, SubName: Full=Metallopeptidase, catalytic domain-containing protein {ECO:0000313|EMBL:KVH92768.1};
TRINITY_DN108012_c3_g1	234.123	4386.5	-4.23	8.06e-77	1.07e-74	down	--	--	--	--	--	--
TRINITY_DN101525_c2_g1	1728.38	375.734	2.2	8.91e-77	1.18e-74	up	GO:0046872,metal ion binding; GO:0016702,oxidoreductase activity, acting on single donors with incorporation of molecular oxygen, incorporation of two atoms of oxygen	--	At3g63520	gb|PLY99876.1|	CCD1_PEA, RecName: Full=Carotenoid 9,10(9',10')-cleavage dioxygenase 1; EC=1.14.99.n4; AltName: Full=PsCCD1; AltName: Full=PsNCED1;	Q2PHF7_LACSA, SubName: Full=Carotenoid cleavage dioxygenase 2 {ECO:0000313|EMBL:BAE72095.1};
TRINITY_DN108464_c0_g2	189.871	715.118	-1.91	8.96e-77	1.19e-74	down	GO:0005737,cytoplasm; GO:0005783,endoplasmic reticulum; GO:0005794,Golgi apparatus; GO:0016020,membrane; GO:0005774,vacuolar membrane; GO:0005773,vacuole; GO:0046872,metal ion binding; GO:0009045,xylose isomerase activity; GO:0042732,D-xylose metabolic process; GO:0006098,pentose-phosphate shunt	K01805: xylA; xylose isomerase [EC:5.3.1.5]	--	gb|KVI11765.1|	XYLA_ARATH, RecName: Full=Xylose isomerase; EC=5.3.1.5;	A0A103YM87_CYNCS, RecName: Full=Xylose isomerase {ECO:0000256|RuleBase:RU000609}; EC=5.3.1.5 {ECO:0000256|RuleBase:RU000609};
TRINITY_DN96913_c1_g1	10429.5	24680	-1.24	1.41e-76	1.86e-74	down	--	--	--	--	--	--
TRINITY_DN94692_c1_g6	1996.63	431.086	2.21	2.11e-76	2.77e-74	up	GO:0016021,integral component of membrane; GO:0016020,membrane; GO:0005886,plasma membrane; GO:0009506,plasmodesma; GO:0005524,ATP binding; GO:0008553,proton-exporting ATPase activity, phosphorylative mechanism; GO:0000287,magnesium ion binding; GO:0006754,ATP biosynthetic process; GO:0015991,ATP hydrolysis coupled proton transport	K01535: PMA1, PMA2; H+-transporting ATPase [EC:3.6.3.6]	At5g57350	gb|PNX89336.1|	PMA3_ARATH, RecName: Full=ATPase 3, plasma membrane-type; EC=3.6.3.6; AltName: Full=Proton pump 3;	Q41647_VICFA, SubName: Full=P-type H+-ATPase {ECO:0000313|EMBL:AAA81348.1}; Flags: Fragment;
TRINITY_DN95817_c0_g1	74.2325	1920.88	-4.69	2.34e-76	3.08e-74	down	GO:0005737,cytoplasm; GO:0005634,nucleus; GO:0019005,SCF ubiquitin ligase complex; GO:0005774,vacuolar membrane; GO:0005516,calmodulin binding; GO:0004402,histone acetyltransferase activity; GO:0003712,transcription cofactor activity; GO:0031625,ubiquitin protein ligase binding; GO:0008270,zinc ion binding; GO:0043161,proteasome-mediated ubiquitin-dependent protein catabolic process; GO:0042787,N…	K02987: RP-S4e, RPS4; small subunit ribosomal protein S4e	At5g67480	gb|KVI08913.1|	BT4_ARATH, RecName: Full=BTB/POZ and TAZ domain-containing protein 4; AltName: Full=BTB and TAZ domain protein 4;	A0A118K5D2_CYNCS, SubName: Full=BTB/POZ-like protein {ECO:0000313|EMBL:KVI08913.1};
TRINITY_DN106806_c1_g3	233.723	7252.33	-4.96	2.52e-76	3.29e-74	down	--	--	--	--	--	--
TRINITY_DN97484_c3_g6	1125.07	112.494	3.32	2.54e-76	3.31e-74	up	GO:0016021,integral component of membrane; GO:0005886,plasma membrane; GO:0015171,amino acid transmembrane transporter activity; GO:0015293,symporter activity; GO:0043090,amino acid import; GO:0080167,response to karrikin	K14209: SLC36A, PAT; solute carrier family 36 (proton-coupled amino acid transporter)	At5g40780	ref|XP_022011489.1|	LHT1_ARATH, RecName: Full=Lysine histidine transporter 1;	A0A251S7W2_HELAN, SubName: Full=Putative amino acid transporter, transmembrane domain-containing protein {ECO:0000313|EMBL:OTF94671.1};
TRINITY_DN101670_c1_g4	2601.35	21.9149	6.9	6.18e-76	8.05e-74	up	GO:0004190,aspartic-type endopeptidase activity; GO:0042802,identical protein binding; GO:0045735,nutrient reservoir activity; GO:0030163,protein catabolic process; GO:0006508,proteolysis	--	At1g03220	gb|KVI01654.1|	7SB1_SOYBN, RecName: Full=Basic 7S globulin; AltName: Full=SBg7S; Short=Bg; Contains: RecName: Full=Basic 7S globulin high kDa subunit; Contains: RecName: Full=Basic 7S globulin low kDa subunit; Flags: Precursor;	A0A103Y355_CYNCS, SubName: Full=Aspartic peptidase {ECO:0000313|EMBL:KVI01654.1};
TRINITY_DN96949_c0_g1	388.869	1139.38	-1.55	7.15e-76	9.29e-74	down	GO:0016021,integral component of membrane; GO:0005774,vacuolar membrane; GO:0022857,transmembrane transporter activity; GO:0008643,carbohydrate transport; GO:0055062,phosphate ion homeostasis	--	At4g17550	ref|XP_021993216.1|	GLPT4_ARATH, RecName: Full=Putative glycerol-3-phosphate transporter 4; Short=G-3-P transporter 4; AltName: Full=Glycerol-3-phosphate permease 4; Short=AtG3Pp4; Short=G-3-P permease 4;	A0A251TAH3_HELAN, SubName: Full=Putative major facilitator superfamily protein {ECO:0000313|EMBL:OTG07652.1};
TRINITY_DN101398_c4_g3	788.305	1712.9	-1.12	8.48e-76	1.1e-73	down	GO:0046658,anchored component of plasma membrane; GO:0016021,integral component of membrane; GO:0009506,plasmodesma; GO:0004871,signal transducer activity; GO:0051607,defense response to virus	--	At3g11660	gb|KVI08387.1|	NHL1_ARATH, RecName: Full=NDR1/HIN1-like protein 1 {ECO:0000303|Ref.1};	A0A124SH43_CYNCS, SubName: Full=Late embryogenesis abundant protein, LEA-14 {ECO:0000313|EMBL:KVI08387.1};
TRINITY_DN103605_c3_g4	636.519	159.929	1.99	9.68e-76	1.25e-73	up	GO:0022626,cytosolic ribosome; GO:0005759,mitochondrial matrix; GO:0005739,mitochondrion; GO:0005524,ATP binding; GO:0004075,biotin carboxylase activity; GO:0050897,cobalt ion binding; GO:0004485,methylcrotonoyl-CoA carboxylase activity; GO:0006552,leucine catabolic process	K01968: E6.4.1.4A; 3-methylcrotonyl-CoA carboxylase alpha subunit [EC:6.4.1.4]	At1g03090	gb|PLY99477.1|	MCCA_ARATH, RecName: Full=Methylcrotonoyl-CoA carboxylase subunit alpha, mitochondrial; Short=MCCase subunit alpha; EC=6.4.1.4; AltName: Full=3-methylcrotonyl-CoA carboxylase 1; AltName: Full=3-methylcrotonyl-CoA:carbon dioxide ligase subunit alpha; Flags: Precursor;	A0A251VMM1_HELAN, SubName: Full=Putative methylcrotonyl-CoA carboxylase alpha chain {ECO:0000313|EMBL:OTG36326.1};
TRINITY_DN95261_c1_g1	454.202	1701.07	-1.91	1.05e-75	1.35e-73	down	GO:0005887,integral component of plasma membrane; GO:0015267,channel activity; GO:0034220,ion transmembrane transport	--	At2g45960	ref|XP_022000317.1|	PIP12_ARATH, RecName: Full=Aquaporin PIP1-2; Short=AtPIP1;2; AltName: Full=Plasma membrane intrinsic protein 1b; Short=PIP1b; AltName: Full=Transmembrane protein A; Short=AthH2; Short=TMP-A;	A0A251SR25_HELAN, SubName: Full=Putative major intrinsic protein, Aquaporin-like protein {ECO:0000313|EMBL:OTG00756.1};
TRINITY_DN108004_c0_g4	333.797	993.15	-1.57	1.92e-75	2.47e-73	down	GO:0048046,apoplast; GO:0005829,cytosol; GO:0016020,membrane; GO:0005886,plasma membrane; GO:0009506,plasmodesma; GO:0005774,vacuolar membrane; GO:0005773,vacuole; GO:0004013,adenosylhomocysteinase activity; GO:0005507,copper ion binding; GO:0051287,NAD binding; GO:0009793,embryo development ending in seed dormancy; GO:0006346,methylation-dependent chromatin silencing; GO:0006730,one-carbon metab…	K01251: E3.3.1.1, ahcY; adenosylhomocysteinase [EC:3.3.1.1]	At4g13940	gb|PLY85653.1|	SAHH1_ARATH, RecName: Full=Adenosylhomocysteinase 1; Short=AdoHcyase 1; EC=3.3.1.1; AltName: Full=Protein EMBRYO DEFECTIVE 1395; AltName: Full=Protein HOMOLOGY-DEPENDENT GENE SILENCING 1; AltName: Full=S-adenosyl-L-homocysteine hydrolase 1; Short=SAH hydrolase 1;	A0A103Y0Q5_CYNCS, RecName: Full=Adenosylhomocysteinase {ECO:0000256|RuleBase:RU000548}; EC=3.3.1.1 {ECO:0000256|RuleBase:RU000548};
TRINITY_DN86801_c0_g2	72.5514	851.196	-3.55	2.17e-75	2.79e-73	down	GO:0031969,chloroplast membrane; GO:0005887,integral component of plasma membrane; GO:0005886,plasma membrane; GO:0008195,phosphatidate phosphatase activity; GO:0006644,phospholipid metabolic process	K18693: DPP1, DPPL, PLPP4_5; diacylglycerol diphosphate phosphatase / phosphatidate phosphatase [EC:3.1.3.81 3.1.3.4]	At3g02600	ref|XP_022017842.1|	LPP3_ARATH, RecName: Full=Putative lipid phosphate phosphatase 3, chloroplastic; Short=AtLPP3; EC=3.1.3.-; AltName: Full=Phosphatidate phosphohydrolase 3; AltName: Full=Phosphatidic acid phosphatase 3; Flags: Precursor;	A0A251RZ43_HELAN, SubName: Full=Putative phosphatidic acid phosphatase type 2/haloperoxidase, Lipid phosphate phosphatase, plant {ECO:0000313|EMBL:OTF91644.1};
TRINITY_DN106057_c1_g1	5853.64	3.67589	10.63	2.89e-75	3.7e-73	up	GO:0005618,cell wall; GO:0005576,extracellular region; GO:0050660,flavin adenine dinucleotide binding; GO:0016614,oxidoreductase activity, acting on CH-OH group of donors	K22395: K22395; cinnamyl-alcohol dehydrogenase [EC:1.1.1.195]	At1g30700	gb|KVH88650.1|	BBE8_ARATH, RecName: Full=Berberine bridge enzyme-like 8 {ECO:0000303|PubMed:26037923}; Short=AtBBE-like 8 {ECO:0000303|PubMed:26037923}; EC=1.1.1.- {ECO:0000250|UniProtKB:O64743}; Flags: Precursor;	A0A103XDB3_CYNCS, SubName: Full=Berberine/berberine-like protein {ECO:0000313|EMBL:KVH88650.1};
TRINITY_DN96879_c2_g1	2155.79	36.5955	5.88	3.39e-75	4.33e-73	up	GO:0005618,cell wall; GO:0005576,extracellular region; GO:0016020,membrane; GO:0009505,plant-type cell wall; GO:0009506,plasmodesma; GO:0005773,vacuole; GO:0020037,heme binding; GO:0046872,metal ion binding; GO:0004601,peroxidase activity; GO:0042744,hydrogen peroxide catabolic process; GO:0009664,plant-type cell wall organization; GO:0006979,response to oxidative stress	K00430: E1.11.1.7; peroxidase [EC:1.11.1.7]	At1g71695	gb|ADP37430.1|	PER12_ARATH, RecName: Full=Peroxidase 12; Short=Atperox P12; EC=1.11.1.7; AltName: Full=ATP4a; AltName: Full=PRXR6; Flags: Precursor;	F6JSA1_CYNCS, RecName: Full=Peroxidase {ECO:0000256|RuleBase:RU362060, ECO:0000256|SAAS:SAAS00709852}; EC=1.11.1.7 {ECO:0000256|RuleBase:RU362060, ECO:0000256|SAAS:SAAS00709852};
TRINITY_DN99914_c4_g7	506.973	1518.61	-1.58	4.32e-75	5.5e-73	down	GO:0005737,cytoplasm; GO:0005643,nuclear pore; GO:0005634,nucleus; GO:0008536,Ran GTPase binding; GO:0000082,G1/S transition of mitotic cell cycle; GO:0051028,mRNA transport; GO:0043547,positive regulation of GTPase activity; GO:0000060,protein import into nucleus, translocation; GO:0006405,RNA export from nucleus; GO:0007051,spindle organization; GO:0006511,ubiquitin-dependent protein catabolic …	--	At2g30060	gb|KVH94116.1|	RBP1C_ARATH, RecName: Full=Ran-binding protein 1 homolog c;	A0A103XNM9_CYNCS, SubName: Full=Pleckstrin homology-like domain-containing protein {ECO:0000313|EMBL:KVH94116.1};
TRINITY_DN107255_c0_g1	1611.14	17083.3	-3.41	4.75e-75	6.03e-73	down	GO:0005887,integral component of plasma membrane; GO:0009705,plant-type vacuole membrane; GO:0005773,vacuole; GO:0005366,myo-inositol:proton symporter activity; GO:0015798,myo-inositol transport	--	At2g43330	ref|XP_022026593.1|	INT1_ARATH, RecName: Full=Inositol transporter 1;	A0A251VKF2_HELAN, SubName: Full=Putative inositol transporter 1 {ECO:0000313|EMBL:OTG35556.1};
TRINITY_DN102517_c2_g2	775.229	124.289	2.64	5.81e-75	7.37e-73	up	GO:0016021,integral component of membrane; GO:0005886,plasma membrane; GO:0005516,calmodulin binding; GO:0006952,defense response; GO:0009817,defense response to fungus, incompatible interaction; GO:0010150,leaf senescence	--	At1g61560	ref|XP_021981514.1|	MLO12_ARATH, RecName: Full=MLO-like protein 12; Short=AtMlo12; Short=AtMlo18;	A0A251TSS8_HELAN, RecName: Full=MLO-like protein {ECO:0000256|RuleBase:RU280816};
TRINITY_DN100823_c0_g3	123.415	680.405	-2.46	7.74e-75	9.79e-73	down	GO:0009507,chloroplast; GO:0009941,chloroplast envelope; GO:0009570,chloroplast stroma; GO:0009536,plastid; GO:0102131,3-oxo-glutaryl-[acp] methyl ester reductase activity; GO:0102132,3-oxo-pimeloyl-[acp] methyl ester reductase activity; GO:0004316,3-oxoacyl-[acyl-carrier-protein] reductase (NADPH) activity; GO:0005507,copper ion binding; GO:0051287,NAD binding; GO:0006633,fatty acid biosynthetic…	K00059: fabG; 3-oxoacyl-[acyl-carrier protein] reductase [EC:1.1.1.100]	At1g63380	gb|PLY80172.1|	FABG_ARATH, RecName: Full=3-oxoacyl-[acyl-carrier-protein] reductase, chloroplastic; EC=1.1.1.100; AltName: Full=3-ketoacyl-acyl carrier protein reductase; Flags: Precursor;	A0A251VGK0_HELAN, SubName: Full=Putative glucose/ribitol dehydrogenase {ECO:0000313|EMBL:OTG34725.1};
TRINITY_DN108012_c2_g3	1542.2	13099.6	-3.09	7.96e-75	1e-72	down	--	--	--	--	--	--
TRINITY_DN104112_c2_g1	6.9358	548.935	-6.28	9.15e-75	1.15e-72	down	--	--	--	--	--	--
TRINITY_DN106957_c4_g1	38.615	436.019	-3.5	2.07e-74	2.6e-72	down	GO:0016021,integral component of membrane; GO:0005774,vacuolar membrane; GO:0008324,cation transmembrane transporter activity	--	At2g39450	gb|PLY68394.1|	MTP5_ORYSJ, RecName: Full=Metal tolerance protein 5; Short=OsMTP5;	A0A103YD81_CYNCS, SubName: Full=Cation efflux protein {ECO:0000313|EMBL:KVI06936.1};
TRINITY_DN99423_c2_g7	615.708	24.1488	4.67	3.26e-74	4.08e-72	up	--	--	--	--	--	--
TRINITY_DN107722_c1_g2	391.9	38.6084	3.34	4e-74	4.99e-72	up	GO:0005829,cytosol; GO:0004842,ubiquitin-protein transferase activity; GO:0006952,defense response; GO:0051865,protein autoubiquitination; GO:0016567,protein ubiquitination; GO:0010200,response to chitin; GO:0009414,response to water deprivation	--	At2g35930	gb|KVH90570.1|	PUB23_ARATH, RecName: Full=E3 ubiquitin-protein ligase PUB23; EC=2.3.2.27; AltName: Full=Plant U-box protein 23; AltName: Full=RING-type E3 ubiquitin transferase PUB23 {ECO:0000305}; AltName: Full=U-box domain-containing protein 23;	A0A103XGZ0_CYNCS, RecName: Full=RING-type E3 ubiquitin transferase {ECO:0000256|SAAS:SAAS00702733}; EC=2.3.2.27 {ECO:0000256|SAAS:SAAS00702733};
TRINITY_DN98961_c2_g2	114.144	1007.67	-3.15	4.42e-74	5.5e-72	down	GO:0005634,nucleus; GO:0009734,auxin-activated signaling pathway; GO:0006355,regulation of transcription, DNA-templated; GO:0006351,transcription, DNA-templated	K14484: IAA; auxin-responsive protein IAA	At1g04240	gb|KVI03889.1|	AX22D_VIGRR, RecName: Full=Auxin-induced protein 22D; AltName: Full=Indole-3-acetic acid-induced protein ARG13;	A0A103Y7E2_CYNCS, RecName: Full=Auxin-responsive protein {ECO:0000256|RuleBase:RU004549}; Flags: Fragment;
TRINITY_DN106383_c0_g3	3.56681	1340.7	-8.57	4.46e-74	5.54e-72	down	GO:0031225,anchored component of membrane; GO:0031012,extracellular matrix; GO:0005886,plasma membrane; GO:0004222,metalloendopeptidase activity; GO:0008270,zinc ion binding	--	At1g59970	gb|KVH92768.1|	5MMP_ARATH, RecName: Full=Metalloendoproteinase 5-MMP {ECO:0000303|PubMed:10574937}; Short=At5-MMP {ECO:0000303|PubMed:10574937}; EC=3.4.24.- {ECO:0000305}; Flags: Precursor;	A0A103XLB1_CYNCS, SubName: Full=Metallopeptidase, catalytic domain-containing protein {ECO:0000313|EMBL:KVH92768.1};
TRINITY_DN99621_c2_g1	143.838	845.344	-2.55	5.75e-74	7.12e-72	down	--	--	At1g10020	gb|PLY91507.1|	--	A0A103YKT1_CYNCS, SubName: Full=Uncharacterized protein {ECO:0000313|EMBL:KVI10855.1};
TRINITY_DN108434_c0_g3	2327.62	901.06	1.37	7.83e-74	9.68e-72	up	GO:0005886,plasma membrane; GO:0005524,ATP binding; GO:0004305,ethanolamine kinase activity; GO:0006646,phosphatidylethanolamine biosynthetic process; GO:0008654,phospholipid biosynthetic process	K00894: ETNK, EKI; ethanolamine kinase [EC:2.7.1.82]	At2g26830	gb|KVI01299.1|	EKI_ARATH, RecName: Full=Probable ethanolamine kinase; EC=2.7.1.82; AltName: Full=Protein EMBRYO DEFECTIVE 1187;	A0A103Y2G1_CYNCS, SubName: Full=Choline/Ethanolamine kinase {ECO:0000313|EMBL:KVI01299.1};
TRINITY_DN102876_c5_g3	644.578	18.9638	5.08	8.79e-74	1.08e-71	up	--	--	--	--	--	--
TRINITY_DN104054_c3_g3	147.191	668.568	-2.19	9.38e-74	1.15e-71	down	--	--	--	--	--	--
TRINITY_DN99348_c5_g2	9.82824	1520.7	-7.29	1.02e-73	1.25e-71	down	GO:0005618,cell wall; GO:0005576,extracellular region; GO:0071555,cell wall organization; GO:0006952,defense response	K20727: PDF1.2; defensin-like protein 16	At1g19610	gb|PLY63374.1|	SF18_HELAN, RecName: Full=Anther-specific protein SF18; AltName: Full=Defensin-like protein; Flags: Precursor; Fragment;	D4IIH9_AMBAR, SubName: Full=Ragweed homologue of Art v 1 {ECO:0000313|EMBL:CBK62702.1};
TRINITY_DN98706_c1_g1	183.914	982.141	-2.42	1.1e-73	1.34e-71	down	GO:0009575,chromoplast stroma; GO:0004310,farnesyl-diphosphate farnesyltransferase activity; GO:0016767,geranylgeranyl-diphosphate geranylgeranyltransferase activity; GO:0051996,squalene synthase activity; GO:0016117,carotenoid biosynthetic process; GO:0006696,ergosterol biosynthetic process	K02291: crtB; 15-cis-phytoene synthase [EC:2.5.1.32]	At5g17230	gb|KVI08675.1|	PSY_CAPAN, RecName: Full=Bifunctional 15-cis-phytoene synthase, chromoplastic {ECO:0000303|PubMed:16578835}; EC=2.5.1.32 {ECO:0000269|PubMed:16578835}; AltName: Full=Geranylgeranyl pyrophosphate geranylgeranyltransferase; AltName: Full=Phytoene synthase {ECO:0000303|PubMed:8250898}; Flags: Precursor;	A0A103YGH0_CYNCS, SubName: Full=Squalene/phytoene synthase {ECO:0000313|EMBL:KVI08675.1};
TRINITY_DN100186_c4_g1	768.747	73.7471	3.38	1.1e-73	1.34e-71	up	--	--	--	--	--	--
TRINITY_DN107863_c3_g2	1459.28	57.0512	4.67	2.01e-73	2.45e-71	up	GO:0005634,nucleus; GO:0003677,DNA binding; GO:0003700,DNA binding transcription factor activity; GO:0006952,defense response; GO:0006351,transcription, DNA-templated	K13433: PTI5; pathogenesis-related genes transcriptional activator PTI5	At4g17500	gb|KVH97047.1|	PTI5_SOLLC, RecName: Full=Pathogenesis-related genes transcriptional activator PTI5; AltName: Full=PTO-interacting protein 5;	A0A124SDI4_CYNCS, SubName: Full=AP2/ERF domain-containing protein {ECO:0000313|EMBL:KVH97047.1};
TRINITY_DN107719_c2_g11	62.7144	732.228	-3.54	2.46e-73	2.99e-71	down	--	--	At4g22860	gb|PLY93456.1|	--	A0A251SBM4_HELAN, SubName: Full=Putative TPX2 {ECO:0000313|EMBL:OTF96244.1};
TRINITY_DN100462_c1_g1	3.54697	935.194	-8.05	3.16e-73	3.83e-71	down	--	--	--	--	--	--
TRINITY_DN99955_c0_g5	489.972	1244.1	-1.34	3.92e-73	4.74e-71	down	--	--	--	--	--	--
TRINITY_DN87524_c0_g2	14.1995	1151.43	-6.35	5.89e-73	7.11e-71	down	GO:0005730,nucleolus; GO:0005634,nucleus; GO:0005886,plasma membrane; GO:0009926,auxin polar transport; GO:0009734,auxin-activated signaling pathway; GO:0007275,multicellular organism development; GO:0046620,regulation of organ growth	K14488: SAUR; SAUR family protein	At1g29500	gb|KVH96560.1|	SAU66_ARATH, RecName: Full=Auxin-responsive protein SAUR66 {ECO:0000305}; AltName: Full=Protein SMALL AUXIN UP RNA 66 {ECO:0000303|PubMed:12036261};	A0A103XTD2_CYNCS, SubName: Full=Auxin responsive SAUR protein {ECO:0000313|EMBL:KVH96560.1};
TRINITY_DN99661_c1_g1	177.643	903.689	-2.34	6.2e-73	7.47e-71	down	GO:0005737,cytoplasm; GO:0005634,nucleus; GO:0005886,plasma membrane; GO:0010187,negative regulation of seed germination; GO:0016567,protein ubiquitination; GO:0009737,response to abscisic acid; GO:0009651,response to salt stress	--	At5g19330	gb|PLY81460.1|	ARIA_ARATH, RecName: Full=ARM REPEAT PROTEIN INTERACTING WITH ABF2; Short=ARIA;	A0A251VL13_HELAN, SubName: Full=Putative ARM repeat protein interacting with ABF2 {ECO:0000313|EMBL:OTG36029.1};
TRINITY_DN101589_c4_g2	60.4338	626.218	-3.38	7.14e-73	8.58e-71	down	GO:0009507,chloroplast; GO:0009570,chloroplast stroma; GO:0005524,ATP binding; GO:0016301,kinase activity; GO:0000287,magnesium ion binding; GO:0030955,potassium ion binding; GO:0004743,pyruvate kinase activity; GO:0006629,lipid metabolic process; GO:0046686,response to cadmium ion; GO:0010431,seed maturation	K00873: PK, pyk; pyruvate kinase [EC:2.7.1.40]	At3g22960	gb|KVI10854.1|	PKP1_ARATH, RecName: Full=Plastidial pyruvate kinase 1, chloroplastic; Short=PK1; Short=PKp1; EC=2.7.1.40; AltName: Full=Pyruvate kinase II; AltName: Full=Pyruvate kinase isozyme A; Short=PKP-ALPHA; Flags: Precursor;	A0A103YKP3_CYNCS, RecName: Full=Pyruvate kinase {ECO:0000256|RuleBase:RU000504}; EC=2.7.1.40 {ECO:0000256|RuleBase:RU000504};
TRINITY_DN103496_c7_g2	217.211	1075.62	-2.31	9.11e-73	1.09e-70	down	GO:0009507,chloroplast; GO:0016020,membrane; GO:0003849,3-deoxy-7-phosphoheptulonate synthase activity; GO:0009073,aromatic amino acid family biosynthetic process; GO:0009423,chorismate biosynthetic process	K01626: E2.5.1.54, aroF, aroG, aroH; 3-deoxy-7-phosphoheptulonate synthase [EC:2.5.1.54]	At1g22410	gb|PLY87989.1|	AROG_SOLLC, RecName: Full=Phospho-2-dehydro-3-deoxyheptonate aldolase 2, chloroplastic; EC=2.5.1.54; AltName: Full=3-deoxy-D-arabino-heptulosonate 7-phosphate synthase 2; AltName: Full=DAHP synthase 2; AltName: Full=Phospho-2-keto-3-deoxyheptonate aldolase 2; Flags: Precursor;	A0A251UTX9_HELAN, RecName: Full=Phospho-2-dehydro-3-deoxyheptonate aldolase {ECO:0000256|RuleBase:RU363071}; EC=2.5.1.54 {ECO:0000256|RuleBase:RU363071};
TRINITY_DN106360_c1_g3	1152.13	248.353	2.22	1.14e-72	1.36e-70	up	GO:0009706,chloroplast inner membrane; GO:0005516,calmodulin binding; GO:0016491,oxidoreductase activity; GO:0015031,protein transport	--	At5g02540	gb|KVH95425.1|	TIC32_PEA, RecName: Full=Short-chain dehydrogenase TIC 32, chloroplastic; EC=1.1.1.-; AltName: Full=Translocon at the inner envelope membrane of chloroplasts 32; Short=PsTIC32;	A0A124SD07_CYNCS, SubName: Full=Glucose/ribitol dehydrogenase {ECO:0000313|EMBL:KVH95425.1};
TRINITY_DN103404_c4_g1	55.6648	563.676	-3.33	1.45e-72	1.73e-70	down	GO:0035091,phosphatidylinositol binding	--	At1g47270	ref|XP_022016332.1|	TLP5_ORYSJ, RecName: Full=Tubby-like F-box protein 5; Short=OsTLP5; AltName: Full=Tubby-like F-box protein 8; Short=OsTLP8;	A0A251VFE2_HELAN, RecName: Full=Tubby-like F-box protein {ECO:0000256|RuleBase:RU361125};
TRINITY_DN105784_c2_g1	107.616	561.284	-2.38	1.91e-72	2.27e-70	down	GO:0005634,nucleus; GO:0005516,calmodulin binding; GO:0003700,DNA binding transcription factor activity; GO:0043565,sequence-specific DNA binding; GO:0001077,transcriptional activator activity, RNA polymerase II proximal promoter sequence-specific DNA binding; GO:0070417,cellular response to cold; GO:0045944,positive regulation of transcription by RNA polymerase II; GO:0006355,regulation of trans…	--	At3g16940	gb|KVH88165.1|	CMTA5_ARATH, RecName: Full=Calmodulin-binding transcription activator 5 {ECO:0000303|PubMed:11925432}; Short=AtCAMTA5 {ECO:0000303|PubMed:11925432}; AltName: Full=Ethylene-induced calmodulin-binding protein f {ECO:0000303|PubMed:11782485}; Short=EICBP.f {ECO:0000303|PubMed:11782485}; AltName: Full=Signal-responsive protein 6 {ECO:0000303|PubMed:12218065}; Short=AtSR6 {ECO:0000303|PubMed:12218065};	A0A118JSK7_CYNCS, SubName: Full=Ankyrin repeat-containing protein {ECO:0000313|EMBL:KVH88165.1};
TRINITY_DN100831_c5_g3	81.0422	515.159	-2.67	2.31e-72	2.75e-70	down	GO:0005634,nucleus; GO:0003700,DNA binding transcription factor activity; GO:0046872,metal ion binding; GO:0044212,transcription regulatory region DNA binding; GO:0006355,regulation of transcription, DNA-templated; GO:0006351,transcription, DNA-templated	--	At5g60850	gb|PLY64942.1|	DOF54_ARATH, RecName: Full=Dof zinc finger protein DOF5.4; Short=AtDOF5.4; AltName: Full=OBF-binding protein 4;	A0A103XYQ4_CYNCS, SubName: Full=Zinc finger, Dof-type {ECO:0000313|EMBL:KVH99299.1};
TRINITY_DN67804_c0_g1	159.696	1231.86	-2.95	2.36e-72	2.8e-70	down	--	--	--	--	--	--
TRINITY_DN106793_c1_g1	429.754	1962.76	-2.19	2.97e-72	3.51e-70	down	GO:0048046,apoplast; GO:0005618,cell wall; GO:0033946,xyloglucan-specific endo-beta-1,4-glucanase activity; GO:0016762,xyloglucan:xyloglucosyl transferase activity; GO:0042546,cell wall biogenesis; GO:0071555,cell wall organization; GO:0010411,xyloglucan metabolic process	--	At4g14130	ref|XP_021993253.1|	XTH15_ARATH, RecName: Full=Xyloglucan endotransglucosylase/hydrolase protein 15 {ECO:0000303|PubMed:12514239}; Short=At-XTH15 {ECO:0000303|PubMed:12514239}; Short=XTH-15 {ECO:0000303|PubMed:12514239}; EC=2.4.1.207 {ECO:0000269|PubMed:25446234}; EC=3.2.1.151 {ECO:0000269|PubMed:25446234}; Flags: Precursor;	A0A251T955_HELAN, RecName: Full=Xyloglucan endotransglucosylase/hydrolase {ECO:0000256|RuleBase:RU361120}; EC=2.4.1.207 {ECO:0000256|RuleBase:RU361120};
TRINITY_DN81920_c0_g2	2.65961	1691.24	-9.36	3.09e-72	3.65e-70	down	GO:0008289,lipid binding; GO:0006869,lipid transport	--	At5g59320	gb|KVH94908.1|	NLTP_HELAN, RecName: Full=Non-specific lipid-transfer protein; Short=LTP; Short=NsLTP; AltName: Full=SDI-9; Flags: Precursor;	A0A103XQ99_CYNCS, RecName: Full=Non-specific lipid-transfer protein {ECO:0000256|RuleBase:RU000628};
TRINITY_DN106869_c0_g3	168.775	1957.03	-3.53	3.6e-72	4.24e-70	down	--	--	--	--	--	--
TRINITY_DN97386_c0_g1	1178.06	465.493	1.34	3.84e-72	4.51e-70	up	GO:0005829,cytosol; GO:0005886,plasma membrane; GO:0009904,chloroplast accumulation movement; GO:0009903,chloroplast avoidance movement	--	At5g55860	gb|KVI02343.1|	Y5586_ARATH, RecName: Full=WEB family protein At5g55860;	A0A118K163_CYNCS, SubName: Full=Uncharacterized protein {ECO:0000313|EMBL:KVI02343.1};
TRINITY_DN108079_c0_g4	15703.2	884.373	4.15	7e-72	8.2e-70	up	GO:0005618,cell wall; GO:0005576,extracellular region; GO:0045330,aspartyl esterase activity; GO:0004857,enzyme inhibitor activity; GO:0030599,pectinesterase activity; GO:0042545,cell wall modification; GO:0045490,pectin catabolic process	K01051: E3.1.1.11; pectinesterase [EC:3.1.1.11]	At2g45220	gb|KVH91209.1|	PME2_CITSI, RecName: Full=Pectinesterase 2; Short=PE 2; EC=3.1.1.11; AltName: Full=Pectin methylesterase; Flags: Precursor;	A0A118JTX1_CYNCS, RecName: Full=Pectinesterase {ECO:0000256|RuleBase:RU000589}; EC=3.1.1.11 {ECO:0000256|RuleBase:RU000589};
TRINITY_DN99559_c3_g2	525.781	8.70109	5.91	8.77e-72	1.03e-69	up	GO:0016021,integral component of membrane; GO:0005886,plasma membrane; GO:0015112,nitrate transmembrane transporter activity; GO:0042128,nitrate assimilation; GO:0015706,nitrate transport; GO:0010167,response to nitrate; GO:0009611,response to wounding	--	At5g50200	ref|XP_022023289.1|	NRT31_ARATH, RecName: Full=High-affinity nitrate transporter 3.1; AltName: Full=Protein WOUND-RESPONSIVE 3; Flags: Precursor;	A0A251RV03_HELAN, SubName: Full=Putative high-affinity nitrate transporter {ECO:0000313|EMBL:OTF88117.1};
TRINITY_DN104984_c0_g4	4577.89	804.502	2.51	9.35e-72	1.09e-69	up	GO:0009507,chloroplast; GO:0042651,thylakoid membrane; GO:0010343,singlet oxygen-mediated programmed cell death	K18681: DIS3L; DIS3-like exonuclease 1 [EC:3.1.13.-]	At4g33630	ref|XP_022028344.1|	EXEC1_ARATH, RecName: Full=Protein EXECUTER 1, chloroplastic {ECO:0000305}; Short=AtEX1 {ECO:0000303|PubMed:17540731}; Flags: Precursor;	A0A251V6P1_HELAN, SubName: Full=Uncharacterized protein {ECO:0000313|EMBL:OTG31288.1};
TRINITY_DN86128_c0_g2	107.955	702.692	-2.7	1.32e-71	1.53e-69	down	GO:0005634,nucleus; GO:0003677,DNA binding; GO:0003700,DNA binding transcription factor activity; GO:0046983,protein dimerization activity; GO:0000977,RNA polymerase II regulatory region sequence-specific DNA binding; GO:0030154,cell differentiation; GO:0009553,embryo sac development; GO:0010582,floral meristem determinacy; GO:0048437,floral organ development; GO:0048449,floral organ formation; G…	--	At2g45650	emb|CAH04879.1|	MADS6_ORYSJ, RecName: Full=MADS-box transcription factor 6; AltName: Full=OsMADS6; AltName: Full=Protein MOSAIC FLORAL ORGANS 1;	Q6EUV6_GERHY, SubName: Full=MADS domain protein {ECO:0000313|EMBL:CAH04879.1};
TRINITY_DN107800_c1_g1	8611.9	970.725	3.15	1.46e-71	1.69e-69	up	--	--	--	--	--	--
TRINITY_DN102922_c6_g1	725.669	1875.73	-1.37	2.04e-71	2.37e-69	down	GO:0005622,intracellular; GO:0005886,plasma membrane; GO:0004435,phosphatidylinositol phospholipase C activity; GO:0004629,phospholipase C activity; GO:0004871,signal transducer activity; GO:0042742,defense response to bacterium; GO:0009553,embryo sac development; GO:0048437,floral organ development; GO:0035556,intracellular signal transduction; GO:0016042,lipid catabolic process; GO:0009556,micr…	K05857: PLCD; phosphatidylinositol phospholipase C, delta [EC:3.1.4.11]	At3g08510	gb|PLY79842.1|	PLCD2_ARATH, RecName: Full=Phosphoinositide phospholipase C 2; EC=3.1.4.11; AltName: Full=Phosphoinositide phospholipase PLC2; Short=AtPLC2; Short=PI-PLC2;	A0A251U5I9_HELAN, RecName: Full=Phosphoinositide phospholipase C {ECO:0000256|RuleBase:RU361133}; EC=3.1.4.11 {ECO:0000256|RuleBase:RU361133};
TRINITY_DN107021_c0_g1	1900.41	667.938	1.51	2.1e-71	2.43e-69	up	GO:0009507,chloroplast; GO:0005739,mitochondrion; GO:0005524,ATP binding; GO:0004828,serine-tRNA ligase activity; GO:0009658,chloroplast organization; GO:0007005,mitochondrion organization; GO:0048481,plant ovule development; GO:0097056,selenocysteinyl-tRNA(Sec) biosynthetic process; GO:0006434,seryl-tRNA aminoacylation	K01875: SARS, serS; seryl-tRNA synthetase [EC:6.1.1.11]	At1g11870	gb|KVI06849.1|	SYSM_ARATH, RecName: Full=Serine--tRNA ligase, chloroplastic/mitochondrial {ECO:0000305}; EC=6.1.1.11 {ECO:0000305}; AltName: Full=AtSRS {ECO:0000303|PubMed:16107332}; AltName: Full=Protein OVULE ABORTION 7 {ECO:0000303|PubMed:16297076}; AltName: Full=Seryl-tRNA synthetase {ECO:0000305}; Short=SerRS {ECO:0000305}; AltName: Full=Seryl-tRNA(Ser/Sec) synthetase {ECO:0000305}; Flags: Precursor;	A0A103YD13_CYNCS, SubName: Full=Aminoacyl-tRNA synthetase, class II {ECO:0000313|EMBL:KVI06849.1};
TRINITY_DN102211_c0_g3	700.219	9211.94	-3.72	2.71e-71	3.12e-69	down	GO:0005737,cytoplasm; GO:0005856,cytoskeleton; GO:0051015,actin filament binding; GO:0046872,metal ion binding; GO:0051017,actin filament bundle assembly	--	At3g61230	ref|XP_016544640.1|	PLI2C_ARATH, RecName: Full=LIM domain-containing protein PLIM2c {ECO:0000305}; AltName: Full=Pollen-expressed LIM protein 2C {ECO:0000305};	A0A1U8EMQ2_CAPAN, SubName: Full=LIM domain-containing protein PLIM2b-like isoform X2 {ECO:0000313|RefSeq:XP_016544640.1};
TRINITY_DN106911_c0_g1	289.56	166604	-9.17	3.38e-71	3.89e-69	down	GO:0031225,anchored component of membrane; GO:0031012,extracellular matrix; GO:0005886,plasma membrane; GO:0004222,metalloendopeptidase activity; GO:0008270,zinc ion binding	--	At1g24140	gb|KVH92768.1|	3MMP_ARATH, RecName: Full=Metalloendoproteinase 3-MMP {ECO:0000303|PubMed:10574937}; Short=At3-MMP {ECO:0000303|PubMed:10574937}; EC=3.4.24.- {ECO:0000305}; Flags: Precursor;	A0A103XLB1_CYNCS, SubName: Full=Metallopeptidase, catalytic domain-containing protein {ECO:0000313|EMBL:KVH92768.1};
TRINITY_DN107373_c1_g8	137.337	3732.56	-4.77	4.15e-71	4.76e-69	down	--	--	--	--	--	--
TRINITY_DN95655_c1_g2	12.0199	539.495	-5.47	8.36e-71	9.57e-69	down	--	--	--	--	--	--
TRINITY_DN97015_c0_g2	43.7745	397.832	-3.18	9.28e-71	1.06e-68	down	GO:0030659,cytoplasmic vesicle membrane	--	At4g32070	gb|KVI11687.1|	PHOX1_ARATH, RecName: Full=Protein PHOX1 {ECO:0000303|PubMed:20856808}; AltName: Full=Protein MADB1 {ECO:0000303|PubMed:28096376}; AltName: Full=Putative myosin adapter B1 {ECO:0000303|PubMed:28096376};	A0A118K760_CYNCS, SubName: Full=Phox/Bem1p {ECO:0000313|EMBL:KVI11687.1};
TRINITY_DN104703_c0_g2	2702.96	1155.13	1.23	1.06e-70	1.21e-68	up	GO:0050662,coenzyme binding; GO:0047787,delta4-3-oxosteroid 5beta-reductase activity; GO:0000166,nucleotide binding	--	At4g24220	gb|KVH93332.1|	5BPOR_DIGLA, RecName: Full=3-oxo-Delta(4,5)-steroid 5-beta-reductase; EC=1.3.1.3 {ECO:0000269|PubMed:16386278, ECO:0000269|PubMed:18032383}; AltName: Full=Delta(4)-3-oxosteroid 5-beta-reductase; AltName: Full=Delta-4,5-steroid 5-beta-reductase; Short=At5beta-StR; AltName: Full=Progesterone 5-beta-reductase; Short=5beta-POR;	A0A103XM59_CYNCS, SubName: Full=NAD-dependent epimerase/dehydratase {ECO:0000313|EMBL:KVH93332.1};
TRINITY_DN97265_c0_g2	1472.49	48.8883	4.91	2.5e-70	2.85e-68	up	GO:0009055,electron transfer activity; GO:0046872,metal ion binding	K04733: IRAK4; interleukin-1 receptor-associated kinase 4 [EC:2.7.11.1]	At5g20230	gb|PLY66369.1|	BCP_PEA, RecName: Full=Blue copper protein; Flags: Precursor;	A0A251TRI4_HELAN, SubName: Full=Putative cupredoxin {ECO:0000313|EMBL:OTG13738.1};
TRINITY_DN103937_c1_g2	2310.45	6944.4	-1.59	3.17e-70	3.6e-68	down	GO:0005829,cytosol; GO:0005634,nucleus; GO:0005524,ATP binding; GO:0016301,kinase activity; GO:0004674,protein serine/threonine kinase activity; GO:0046777,protein autophosphorylation; GO:0009741,response to brassinosteroid	K03083: GSK3B; glycogen synthase kinase 3 beta [EC:2.7.11.26]	At4g00720	gb|PLY85044.1|	KSG8_ARATH, RecName: Full=Shaggy-related protein kinase theta; EC=2.7.11.1; AltName: Full=ASK-theta; AltName: Full=Shaggy-related protein kinase 32; Short=AtSK32;	A0A251UHD9_HELAN, SubName: Full=Uncharacterized protein {ECO:0000313|EMBL:OTG22276.1};
TRINITY_DN98679_c1_g1	2220.24	24818.2	-3.48	3.54e-70	4.01e-68	down	--	--	Hs7705566	--	--	--
TRINITY_DN108282_c3_g1	12666.5	29761.2	-1.23	3.77e-70	4.26e-68	down	--	--	--	--	--	--
TRINITY_DN107387_c0_g1	533.372	2452.22	-2.2	8.06e-70	9.09e-68	down	GO:0005737,cytoplasm; GO:0003871,5-methyltetrahydropteroyltriglutamate-homocysteine S-methyltransferase activity; GO:0008270,zinc ion binding; GO:0009086,methionine biosynthetic process	K00549: metE; 5-methyltetrahydropteroyltriglutamate--homocysteine methyltransferase [EC:2.1.1.14]	At5g17920	ref|XP_021973360.1|	METE_CATRO, RecName: Full=5-methyltetrahydropteroyltriglutamate--homocysteine methyltransferase; EC=2.1.1.14; AltName: Full=Cobalamin-independent methionine synthase isozyme; AltName: Full=Vitamin-B12-independent methionine synthase isozyme;	A0A251UD42_HELAN, SubName: Full=Putative cobalamin-independent methionine synthase {ECO:0000313|EMBL:OTG20806.1};
TRINITY_DN94359_c8_g1	3264.49	68.5728	5.57	8.19e-70	9.21e-68	up	--	--	--	gb|KVI10157.1|	--	A0A118K650_CYNCS, SubName: Full=Late embryogenesis abundant protein, LEA-14 {ECO:0000313|EMBL:KVI10157.1};
TRINITY_DN96058_c0_g1	899.217	15.0503	5.9	1.26e-69	1.41e-67	up	GO:0004190,aspartic-type endopeptidase activity; GO:0045735,nutrient reservoir activity; GO:0030163,protein catabolic process; GO:0006508,proteolysis	--	At1g03220	gb|PLY70167.1|	7SBG2_SOYBN, RecName: Full=Basic 7S globulin 2; AltName: Full=SBg7S; Short=Bg; Contains: RecName: Full=Basic 7S globulin 2 high kDa subunit; Contains: RecName: Full=Basic 7S globulin 2 low kDa subunit; Flags: Precursor;	A0A103XPE0_CYNCS, SubName: Full=Aspartic peptidase {ECO:0000313|EMBL:KVH94400.1};
TRINITY_DN105068_c0_g4	250.849	6834.15	-4.77	2.86e-69	3.21e-67	down	--	--	--	--	--	--
TRINITY_DN106048_c1_g2	425.147	72.8321	2.54	3.38e-69	3.78e-67	up	GO:0005886,plasma membrane	--	At3g26910	gb|KVH97867.1|	Y2349_ARATH, RecName: Full=Uncharacterized protein At2g33490;	A0A124SDS5_CYNCS, SubName: Full=Uncharacterized protein {ECO:0000313|EMBL:KVH97867.1};
TRINITY_DN108079_c0_g1	11601.7	520.277	4.48	4.14e-69	4.62e-67	up	GO:0071944,cell periphery; GO:0005618,cell wall; GO:0005576,extracellular region; GO:0016020,membrane; GO:0045330,aspartyl esterase activity; GO:0030599,pectinesterase activity; GO:0046910,pectinesterase inhibitor activity; GO:0042545,cell wall modification; GO:0050829,defense response to Gram-negative bacterium; GO:0045490,pectin catabolic process; GO:0009617,response to bacterium; GO:0009620,re…	K01051: E3.1.1.11; pectinesterase [EC:3.1.1.11]	At2g45220	gb|KVH91209.1|	PME17_ARATH, RecName: Full=Probable pectinesterase/pectinesterase inhibitor 17; Includes: RecName: Full=Pectinesterase inhibitor 17; AltName: Full=Pectin methylesterase inhibitor 17; Includes: RecName: Full=Pectinesterase 17; Short=PE 17; EC=3.1.1.11; AltName: Full=Pectin methylesterase 17; Short=AtPME17; Flags: Precursor;	A0A118JTX1_CYNCS, RecName: Full=Pectinesterase {ECO:0000256|RuleBase:RU000589}; EC=3.1.1.11 {ECO:0000256|RuleBase:RU000589};
TRINITY_DN101717_c0_g4	6.39402	428.554	-6.06	7.51e-69	8.36e-67	down	--	--	--	--	--	--
TRINITY_DN107019_c8_g1	3.18155	963.595	-8.23	2.38e-68	2.64e-66	down	--	--	--	--	--	--
TRINITY_DN107666_c4_g3	13002.8	2130.89	2.61	2.47e-68	2.74e-66	up	--	--	--	--	--	--
TRINITY_DN106727_c1_g1	796.475	3376.95	-2.08	3.14e-68	3.48e-66	down	GO:0004013,adenosylhomocysteinase activity; GO:0051287,NAD binding; GO:0006730,one-carbon metabolic process; GO:0019510,S-adenosylhomocysteine catabolic process	K01251: E3.3.1.1, ahcY; adenosylhomocysteinase [EC:3.3.1.1]	At4g13940	gb|KVI00370.1|	SAHH_PETCR, RecName: Full=Adenosylhomocysteinase; Short=AdoHcyase; EC=3.3.1.1; AltName: Full=S-adenosyl-L-homocysteine hydrolase;	A0A103Y0Q5_CYNCS, RecName: Full=Adenosylhomocysteinase {ECO:0000256|RuleBase:RU000548}; EC=3.3.1.1 {ECO:0000256|RuleBase:RU000548};
TRINITY_DN102781_c0_g1	1290.85	27.6511	5.55	4.43e-68	4.89e-66	up	GO:0004058,aromatic-L-amino-acid decarboxylase activity; GO:0030170,pyridoxal phosphate binding; GO:0004837,tyrosine decarboxylase activity; GO:0006520,cellular amino acid metabolic process	K01593: DDC, TDC; aromatic-L-amino-acid/L-tryptophan decarboxylase [EC:4.1.1.28 4.1.1.105]	At2g20340	gb|KVH99748.1|	TYDC5_PAPSO, RecName: Full=Tyrosine/DOPA decarboxylase 5; Includes: RecName: Full=DOPA decarboxylase; Short=DDC; EC=4.1.1.28; Includes: RecName: Full=Tyrosine decarboxylase; EC=4.1.1.25;	A0A103XZI3_CYNCS, SubName: Full=Uncharacterized protein {ECO:0000313|EMBL:KVH99748.1}; Flags: Fragment;
TRINITY_DN100539_c2_g2	788.105	1863	-1.24	5.72e-68	6.3e-66	down	--	--	--	--	--	--
TRINITY_DN103128_c9_g1	41.7966	347.18	-3.06	7e-68	7.69e-66	down	GO:0005884,actin filament; GO:0005737,cytoplasm; GO:0008290,F-actin capping protein complex; GO:0051015,actin filament binding; GO:0030036,actin cytoskeleton organization; GO:0051693,actin filament capping; GO:0007015,actin filament organization; GO:0051016,barbed-end actin filament capping; GO:0000902,cell morphogenesis; GO:0009408,response to heat	K10365: CAPZB; capping protein (actin filament) muscle Z-line, beta	At1g71790	gb|KVI07217.1|	CAPZB_ARATH, RecName: Full=Probable F-actin-capping protein subunit beta; AltName: Full=CapZ-beta;	A0A124SGR7_CYNCS, SubName: Full=F-actin capping protein, beta subunit, conserved site-containing protein {ECO:0000313|EMBL:KVI07217.1};
TRINITY_DN98933_c2_g2	87.5115	1235.39	-3.82	7.78e-68	8.53e-66	down	GO:0005871,kinesin complex; GO:0005874,microtubule; GO:0005524,ATP binding; GO:0016887,ATPase activity; GO:0008017,microtubule binding; GO:0003777,microtubule motor activity; GO:0007018,microtubule-based movement	--	At3g51150	gb|PLY82996.1|	KN7G_ARATH, RecName: Full=Kinesin-like protein KIN-7G {ECO:0000305};	A0A251VHB8_HELAN, SubName: Full=Putative kinesin motor domain-containing protein {ECO:0000313|EMBL:OTG34081.1};
TRINITY_DN81873_c0_g1	17.7949	833.164	-5.56	7.95e-68	8.7e-66	down	--	--	--	--	--	--
TRINITY_DN105936_c1_g1	4021.44	435.381	3.21	8.05e-68	8.79e-66	up	GO:0016021,integral component of membrane; GO:0005886,plasma membrane; GO:0015591,D-ribose transmembrane transporter activity; GO:0015148,D-xylose transmembrane transporter activity; GO:0005354,galactose transmembrane transporter activity; GO:0005355,glucose transmembrane transporter activity; GO:0015168,glycerol transmembrane transporter activity; GO:0015575,mannitol transmembrane transporter ac…	--	At3g18830	gb|PLY97588.1|	PLT5_ARATH, RecName: Full=Polyol transporter 5; AltName: Full=Protein POLYOL TRANSPORTER 5; Short=AtPLT5; AltName: Full=Sugar-proton symporter PLT5;	B2D0J3_ARTAN, SubName: Full=Mannitol transporter {ECO:0000313|EMBL:ACB56939.1};
TRINITY_DN105391_c0_g2	11780.5	3239.43	1.86	8.9e-68	9.69e-66	up	--	--	--	--	--	--
TRINITY_DN104112_c2_g2	47.8086	1290.28	-4.76	9.67e-68	1.05e-65	down	--	--	--	--	--	--
TRINITY_DN106130_c2_g2	2970.08	1448	1.04	1.37e-67	1.49e-65	up	GO:0005739,mitochondrion	K01528: DNM; dynamin GTPase [EC:3.6.5.5]	AtMi065	ref|XP_021843707.1|	M810_ARATH, RecName: Full=Uncharacterized mitochondrial protein AtMg00810; AltName: Full=ORF240b;	A0A1J3JIQ3_NOCCA, SubName: Full=Putative mitochondrial protein {ECO:0000313|EMBL:JAU92217.1};
TRINITY_DN108116_c7_g1	611.634	6258.37	-3.36	1.55e-67	1.68e-65	down	GO:0005887,integral component of plasma membrane; GO:0009705,plant-type vacuole membrane; GO:0005773,vacuole; GO:0005366,myo-inositol:proton symporter activity; GO:0015798,myo-inositol transport	--	At2g43330	ref|XP_022026593.1|	INT1_ARATH, RecName: Full=Inositol transporter 1;	A0A251VKF2_HELAN, SubName: Full=Putative inositol transporter 1 {ECO:0000313|EMBL:OTG35556.1};
TRINITY_DN107247_c0_g3	826.098	158.997	2.38	3.68e-67	3.97e-65	up	GO:0005634,nucleus; GO:0005886,plasma membrane; GO:0005524,ATP binding; GO:0004675,transmembrane receptor protein serine/threonine kinase activity; GO:0007166,cell surface receptor signaling pathway; GO:0006952,defense response; GO:0006468,protein phosphorylation	K04733: IRAK4; interleukin-1 receptor-associated kinase 4 [EC:2.7.11.1]	At1g76360	gb|PLY90485.1|	PIX13_ARATH, RecName: Full=Probable serine/threonine-protein kinase PIX13 {ECO:0000305}; EC=2.7.11.1 {ECO:0000305};	A0A103YEN0_CYNCS, SubName: Full=Concanavalin A-like lectin/glucanase, subgroup {ECO:0000313|EMBL:KVI07705.1};
TRINITY_DN100849_c1_g1	16.9077	301.683	-4.15	4.29e-67	4.63e-65	down	--	K04733: IRAK4; interleukin-1 receptor-associated kinase 4 [EC:2.7.11.1]	At4g34940	gb|KVH96030.1|	--	A0A103XSE8_CYNCS, SubName: Full=Armadillo {ECO:0000313|EMBL:KVH96030.1};
TRINITY_DN105147_c0_g1	1060.98	94.6717	3.49	6.48e-67	6.97e-65	up	GO:0005794,Golgi apparatus; GO:0016020,membrane; GO:0005886,plasma membrane; GO:0009506,plasmodesma; GO:0005774,vacuolar membrane; GO:0005773,vacuole; GO:0043424,protein histidine kinase binding	--	At5g62740	ref|XP_017179189.1|	HIR1_ARATH, RecName: Full=Hypersensitive-induced response protein 1 {ECO:0000303|PubMed:15060130}; Short=AtHIR1 {ECO:0000303|PubMed:15060130};	A0A251LTH5_MANES, SubName: Full=Uncharacterized protein {ECO:0000313|EMBL:OAY61456.1};
TRINITY_DN108309_c1_g1	7976.28	516.395	3.95	9.05e-67	9.71e-65	up	--	--	--	--	--	--
TRINITY_DN107474_c1_g1	871.847	187.133	2.22	1.09e-66	1.17e-64	up	GO:0005759,mitochondrial matrix; GO:0005739,mitochondrion; GO:0005524,ATP binding; GO:0050897,cobalt ion binding; GO:0004485,methylcrotonoyl-CoA carboxylase activity; GO:0008270,zinc ion binding; GO:0006552,leucine catabolic process	K01969: E6.4.1.4B; 3-methylcrotonyl-CoA carboxylase beta subunit [EC:6.4.1.4]	At4g34030	gb|KVI01745.1|	MCCB_ARATH, RecName: Full=Methylcrotonoyl-CoA carboxylase beta chain, mitochondrial; Short=MCCase subunit beta; EC=6.4.1.4; AltName: Full=3-methylcrotonyl-CoA carboxylase 2; AltName: Full=3-methylcrotonyl-CoA:carbon dioxide ligase subunit beta; Flags: Precursor;	A0A103Y399_CYNCS, SubName: Full=Acetyl-coenzyme A carboxyltransferase, C-terminal {ECO:0000313|EMBL:KVI01745.1};
TRINITY_DN97063_c4_g3	29.9211	1108.95	-5.21	2e-66	2.14e-64	down	GO:0005737,cytoplasm; GO:0005634,nucleus; GO:0005524,ATP binding; GO:0004709,MAP kinase kinase kinase activity; GO:0004672,protein kinase activity; GO:0004674,protein serine/threonine kinase activity; GO:0004702,signal transducer, downstream of receptor, with serine/threonine kinase activity; GO:0009738,abscisic acid-activated signaling pathway; GO:0032147,activation of protein kinase activity; G…	K20716: MAPKKK17_18; mitogen-activated protein kinase kinase kinase 17/18	At5g55090	gb|KVI02030.1|	M3K18_ARATH, RecName: Full=Mitogen-activated protein kinase kinase kinase 18 {ECO:0000303|PubMed:26443375}; EC=2.7.11.25 {ECO:0000255|PROSITE-ProRule:PRU00159, ECO:0000269|PubMed:25680457, ECO:0000269|PubMed:26443375};	A0A103Y3U0_CYNCS, SubName: Full=Protein kinase, ATP binding site-containing protein {ECO:0000313|EMBL:KVI02030.1};
TRINITY_DN107440_c1_g1	1439.11	19526.4	-3.76	2.28e-66	2.43e-64	down	GO:0005737,cytoplasm; GO:0005874,microtubule; GO:0005525,GTP binding; GO:0003924,GTPase activity; GO:0005200,structural constituent of cytoskeleton; GO:0007017,microtubule-based process	K07375: TUBB; tubulin beta	At1g75780	ref|XP_014625361.1|	TBB1_MAIZE, RecName: Full=Tubulin beta-1 chain; AltName: Full=Beta-1-tubulin;	I1MY33_SOYBN, RecName: Full=Tubulin beta chain {ECO:0000256|RuleBase:RU000352};
TRINITY_DN94195_c0_g2	475.483	10.3331	5.52	2.7e-66	2.88e-64	up	GO:0016021,integral component of membrane; GO:0046872,metal ion binding; GO:0061630,ubiquitin protein ligase activity; GO:0004842,ubiquitin-protein transferase activity; GO:0043161,proteasome-mediated ubiquitin-dependent protein catabolic process; GO:0016567,protein ubiquitination	--	At2g42360	gb|KVI04331.1|	ATL41_ARATH, RecName: Full=E3 ubiquitin-protein ligase ATL41; EC=2.3.2.27 {ECO:0000269|PubMed:15644464, ECO:0000269|PubMed:16339806}; AltName: Full=RING-H2 finger protein ATL41; AltName: Full=RING-type E3 ubiquitin transferase ATL41 {ECO:0000305};	A0A103Y890_CYNCS, SubName: Full=Zinc finger, RING/FYVE/PHD-type {ECO:0000313|EMBL:KVI04331.1};
TRINITY_DN105878_c0_g2	109.155	1543.51	-3.82	3.6e-66	3.82e-64	down	GO:0005623,cell; GO:0008889,glycerophosphodiester phosphodiesterase activity; GO:0030643,cellular phosphate ion homeostasis; GO:0006071,glycerol metabolic process; GO:0046475,glycerophospholipid catabolic process	K18696: GDE1; glycerophosphodiester phosphodiesterase [EC:3.1.4.46]	At5g41080	ref|XP_022011496.1|	GDPD2_ARATH, RecName: Full=Glycerophosphodiester phosphodiesterase GDPD2 {ECO:0000305}; EC=3.1.4.46 {ECO:0000250|UniProtKB:Q9SGA2}; AltName: Full=Glycerophosphodiester phosphodiesterase 2 {ECO:0000303|PubMed:21323773}; Short=AtGDPD2 {ECO:0000303|PubMed:21323773};	A0A251S7Y2_HELAN, SubName: Full=Putative PLC-like phosphodiesterase, TIM beta/alpha-barrel domain-containing protein {ECO:0000313|EMBL:OTF94682.1};
TRINITY_DN100695_c2_g2	91.6656	618.319	-2.75	3.94e-66	4.17e-64	down	GO:0009507,chloroplast; GO:0102131,3-oxo-glutaryl-[acp] methyl ester reductase activity; GO:0102132,3-oxo-pimeloyl-[acp] methyl ester reductase activity; GO:0004316,3-oxoacyl-[acyl-carrier-protein] reductase (NADPH) activity; GO:0051287,NAD binding; GO:0006633,fatty acid biosynthetic process	K00059: fabG; 3-oxoacyl-[acyl-carrier protein] reductase [EC:1.1.1.100]	At1g24360	gb|KVH95785.1|	FABG_CUPLA, RecName: Full=3-oxoacyl-[acyl-carrier-protein] reductase, chloroplastic; EC=1.1.1.100; AltName: Full=3-ketoacyl-acyl carrier protein reductase; Flags: Precursor;	A0A124SD43_CYNCS, SubName: Full=3-oxoacyl-(Acyl-carrier-protein) reductase {ECO:0000313|EMBL:KVH95785.1};
TRINITY_DN103511_c2_g3	4184.58	810.354	2.37	7.22e-66	7.64e-64	up	--	--	--	gb|PLY93858.1|	--	--
TRINITY_DN96645_c0_g3	1005.46	42.3793	4.57	1.41e-65	1.49e-63	up	GO:0048046,apoplast; GO:0005618,cell wall; GO:0005829,cytosol; GO:0005794,Golgi apparatus; GO:0009505,plant-type cell wall; GO:0005774,vacuolar membrane; GO:0030246,carbohydrate binding	K04733: IRAK4; interleukin-1 receptor-associated kinase 4 [EC:2.7.11.1]	At1g78850	gb|OTF87639.1|	EP1L3_ARATH, RecName: Full=EP1-like glycoprotein 3 {ECO:0000303|PubMed:15276441}; AltName: Full=Curculin-like (Mannose-binding) lectin family protein {ECO:0000303|PubMed:23738689}; AltName: Full=Putative receptor-like protein kinase-like protein {ECO:0000303|PubMed:12833529}; Flags: Precursor;	A0A251RXK0_HELAN, SubName: Full=Putative epidermis-specific secreted glycoprotein EP1 {ECO:0000313|EMBL:OTF87639.1};
TRINITY_DN93352_c0_g1	383.849	4423.36	-3.53	1.58e-65	1.66e-63	down	GO:0009507,chloroplast; GO:0009535,chloroplast thylakoid membrane; GO:0005783,endoplasmic reticulum; GO:0005886,plasma membrane; GO:0010287,plastoglobule; GO:0009579,thylakoid; GO:0005774,vacuolar membrane; GO:0005773,vacuole; GO:0040008,regulation of growth; GO:0009409,response to cold; GO:0009651,response to salt stress; GO:0009414,response to water deprivation	--	At4g39730	gb|KVI03121.1|	PLAT1_ARATH, RecName: Full=PLAT domain-containing protein 1 {ECO:0000305}; Short=AtPLAT1 {ECO:0000303|PubMed:25396746}; Short=PLAT domain protein 1 {ECO:0000303|PubMed:25396746}; Flags: Precursor;	A0A124SFF9_CYNCS, SubName: Full=Lipase/lipooxygenase, PLAT/LH2 {ECO:0000313|EMBL:KVI03121.1};
TRINITY_DN102150_c1_g7	258.445	2591.08	-3.33	1.71e-65	1.8e-63	down	--	--	--	gb|KVI07335.1|	--	A0A118K4D6_CYNCS, SubName: Full=Uncharacterized protein {ECO:0000313|EMBL:KVI07335.1};
TRINITY_DN104745_c0_g3	256.785	929.761	-1.85	1.72e-65	1.8e-63	down	GO:0005759,mitochondrial matrix; GO:0005524,ATP binding; GO:0004176,ATP-dependent peptidase activity; GO:0051082,unfolded protein binding; GO:0030163,protein catabolic process; GO:0006457,protein folding; GO:0006508,proteolysis	K03544: clpX, CLPX; ATP-dependent Clp protease ATP-binding subunit ClpX	At1g33360	ref|XP_022013668.1|	CLPX3_ARATH, RecName: Full=CLP protease regulatory subunit CLPX3, mitochondrial {ECO:0000303|Ref.4}; Flags: Precursor;	A0A251VFE8_HELAN, SubName: Full=Putative ATPase, AAA-type, core {ECO:0000313|EMBL:OTG33642.1};
TRINITY_DN105873_c4_g1	6154.98	361.684	4.09	5.44e-65	5.69e-63	up	GO:0016021,integral component of membrane; GO:0005886,plasma membrane; GO:0009506,plasmodesma; GO:0009679,hexose:proton symporter activity; GO:0005358,high-affinity glucose:proton symporter activity; GO:0015145,monosaccharide transmembrane transporter activity; GO:0046323,glucose import; GO:0015749,monosaccharide transmembrane transport; GO:0009737,response to abscisic acid; GO:0009651,response t…	--	At5g26340	gb|PLY67086.1|	STP13_ARATH, RecName: Full=Sugar transport protein 13; AltName: Full=Hexose transporter 13; AltName: Full=Multicopy suppressor of snf4 deficiency protein 1;	A0A251TJB9_HELAN, SubName: Full=Putative major facilitator superfamily protein {ECO:0000313|EMBL:OTG11235.1};
TRINITY_DN96941_c1_g2	5315.18	2195.4	1.28	5.46e-65	5.7e-63	up	GO:0006952,defense response; GO:0009607,response to biotic stimulus	--	--	gb|KVH96493.1|	RAP_TAROF, RecName: Full=Root allergen protein; Short=RAP;	A0A103XTD1_CYNCS, SubName: Full=Bet v I domain-containing protein {ECO:0000313|EMBL:KVH96493.1};
TRINITY_DN108246_c1_g3	4366.46	453.535	3.27	5.68e-65	5.93e-63	up	--	--	--	--	--	--
TRINITY_DN97324_c11_g2	3403.2	1693.41	1.01	9.39e-65	9.77e-63	up	--	--	--	--	--	--
TRINITY_DN106961_c4_g2	3402.08	1343.54	1.34	1.21e-64	1.25e-62	up	--	--	--	--	--	--
TRINITY_DN106968_c1_g1	92.0844	43981.7	-8.9	1.39e-64	1.44e-62	down	--	--	--	--	--	--
TRINITY_DN104229_c0_g2	525.363	2089.74	-1.99	1.73e-64	1.79e-62	down	--	K08726: EPHX2; soluble epoxide hydrolase / lipid-phosphate phosphatase [EC:3.3.2.10 3.1.3.76]	At3g05600	gb|KVH89561.1|	--	A0A118JTE6_CYNCS, SubName: Full=Epoxide hydrolase-like protein {ECO:0000313|EMBL:KVH89561.1};
TRINITY_DN93262_c0_g1	1960.65	142.346	3.79	1.84e-64	1.9e-62	up	--	K13985: NAPEPLD; N-acyl-phosphatidylethanolamine-hydrolysing phospholipase D [EC:3.1.4.54]	CE27604	gb|POF13148.1|	--	F2E5V4_HORVV, SubName: Full=Predicted protein {ECO:0000313|EMBL:BAK02726.1};
TRINITY_DN108414_c10_g1	1435.56	4.35055	8.36	3.11e-64	3.2e-62	up	GO:0016410,N-acyltransferase activity; GO:0080074,spermidine:caffeoyl CoA N-acyltransferase activity; GO:0080073,spermidine:coumaroyl CoA N-acyltransferase activity; GO:0080075,spermidine:feruloyl CoA N-acyltransferase activity; GO:0080072,spermidine:sinapoyl CoA N-acyltransferase activity; GO:0009555,pollen development; GO:0010584,pollen exine formation; GO:0080088,spermidine hydroxycinnamate co…	K13065: E2.3.1.133, HCT; shikimate O-hydroxycinnamoyltransferase [EC:2.3.1.133]	At2g19070	gb|KVI11866.1|	SHT_ARATH, RecName: Full=Spermidine hydroxycinnamoyl transferase; EC=2.3.1.-; AltName: Full=BAHD-like hydroxycinnamoyl transferase;	A0A124SI78_CYNCS, SubName: Full=Uncharacterized protein {ECO:0000313|EMBL:KVI11866.1};
TRINITY_DN102409_c3_g1	1270.1	95.392	3.74	3.98e-64	4.09e-62	up	GO:0005794,Golgi apparatus; GO:0016020,membrane; GO:0005886,plasma membrane; GO:0009506,plasmodesma; GO:0005774,vacuolar membrane; GO:0005773,vacuole; GO:0043424,protein histidine kinase binding	--	At5g62740	ref|XP_017179189.1|	HIR1_ARATH, RecName: Full=Hypersensitive-induced response protein 1 {ECO:0000303|PubMed:15060130}; Short=AtHIR1 {ECO:0000303|PubMed:15060130};	A0A251LTH5_MANES, SubName: Full=Uncharacterized protein {ECO:0000313|EMBL:OAY61456.1};
TRINITY_DN104531_c2_g1	110.252	883.787	-3.01	3.98e-64	4.09e-62	down	GO:0005887,integral component of plasma membrane; GO:0008271,secondary active sulfate transmembrane transporter activity; GO:0015116,sulfate transmembrane transporter activity; GO:0015293,symporter activity	--	At1g23090	ref|XP_022015613.1|	SUT33_ARATH, RecName: Full=Probable sulfate transporter 3.3; AltName: Full=AST91;	A0A251S3K5_HELAN, SubName: Full=Putative sulfate transporter 91 {ECO:0000313|EMBL:OTF93194.1};
TRINITY_DN108088_c4_g1	1657.56	286.647	2.53	7.13e-64	7.3e-62	up	GO:0005618,cell wall; GO:0005576,extracellular region; GO:0008061,chitin binding; GO:0004568,chitinase activity; GO:0008843,endochitinase activity; GO:0035885,exochitinase activity; GO:0005975,carbohydrate metabolic process; GO:0006032,chitin catabolic process; GO:0009737,response to abscisic acid; GO:0009753,response to jasmonic acid; GO:0009651,response to salt stress	K01183: E3.2.1.14; chitinase [EC:3.2.1.14]	At4g19810	gb|KVH88729.1|	CHIC_ARATH, RecName: Full=Class V chitinase {ECO:0000303|PubMed:22936594}; Short=AtChiC {ECO:0000303|PubMed:22936594}; EC=3.2.1.14 {ECO:0000269|PubMed:21390509, ECO:0000269|PubMed:22936594}; Flags: Precursor;	A0A103XDI5_CYNCS, SubName: Full=Chitinase II {ECO:0000313|EMBL:KVH88729.1};
TRINITY_DN99578_c8_g1	342.31	2778.4	-3.02	8e-64	8.17e-62	down	GO:0005783,endoplasmic reticulum; GO:0005789,endoplasmic reticulum membrane; GO:0005887,integral component of plasma membrane; GO:0005886,plasma membrane; GO:0051119,sugar transmembrane transporter activity; GO:0051260,protein homooligomerization	--	At1g21460	gb|KVH98755.1|	SWET1_ARATH, RecName: Full=Bidirectional sugar transporter SWEET1 {ECO:0000303|PubMed:21107422}; Short=AtSWEET1 {ECO:0000303|PubMed:21107422}; AltName: Full=Protein SUGARS WILL EVENTUALLY BE EXPORTED TRANSPORTERS 1 {ECO:0000303|PubMed:21107422};	A0A124SE28_CYNCS, RecName: Full=Bidirectional sugar transporter SWEET {ECO:0000256|RuleBase:RU910715};
TRINITY_DN98916_c2_g1	209.716	758.276	-1.85	8.48e-64	8.65e-62	down	GO:0036513,Derlin-1 retrotranslocation complex; GO:0044322,endoplasmic reticulum quality control compartment; GO:0000836,Hrd1p ubiquitin ligase complex; GO:0016021,integral component of membrane; GO:0005886,plasma membrane; GO:0046872,metal ion binding; GO:1904264,NA; GO:1990381,ubiquitin-specific protease binding; GO:0051082,unfolded protein binding; GO:0030968,endoplasmic reticulum unfolded pro…	--	At5g01960	ref|XP_012090998.1|	HRD1B_ARATH, RecName: Full=ERAD-associated E3 ubiquitin-protein ligase HRD1B {ECO:0000305}; Short=AtHrd1B {ECO:0000303|PubMed:21187394}; EC=2.3.2.27 {ECO:0000305}; AltName: Full=RING-type E3 ubiquitin transferase HRD1B {ECO:0000305};	A0A067JDD7_JATCU, SubName: Full=Uncharacterized protein {ECO:0000313|EMBL:KDP21837.1};
TRINITY_DN96352_c1_g1	2431.55	865.073	1.49	9.71e-64	9.89e-62	up	GO:0005783,endoplasmic reticulum; GO:0010211,IAA-Leu conjugate hydrolase activity; GO:0010210,IAA-Phe conjugate hydrolase activity; GO:0046872,metal ion binding; GO:0009850,auxin metabolic process	--	At3g02875	gb|KVI08367.1|	ILR1_ARATH, RecName: Full=IAA-amino acid hydrolase ILR1 {ECO:0000303|PubMed:7792599}; EC=3.5.1.- {ECO:0000305}; Flags: Precursor;	A0A103YFX2_CYNCS, SubName: Full=Amidohydrolase {ECO:0000313|EMBL:KVI08367.1};
TRINITY_DN96461_c0_g2	10724.3	1070.04	3.33	1.19e-63	1.2e-61	up	--	--	--	gb|PLY81986.1|	--	A0A251U154_HELAN, SubName: Full=Uncharacterized protein {ECO:0000313|EMBL:OTG17095.1};
TRINITY_DN96862_c2_g1	1104.16	111.688	3.31	1.61e-63	1.63e-61	up	GO:0004364,glutathione transferase activity; GO:0009734,auxin-activated signaling pathway	K00799: GST, gst; glutathione S-transferase [EC:2.5.1.18]	At2g47730	gb|KVI12466.1|	GSTF_HYOMU, RecName: Full=Glutathione S-transferase; EC=2.5.1.18; AltName: Full=25 kDa auxin-binding protein; AltName: Full=GST class-phi;	A0A118K7M4_CYNCS, SubName: Full=Glutathione S-transferase/chloride channel, C-terminal {ECO:0000313|EMBL:KVI12466.1};
TRINITY_DN102358_c0_g2	362.35	1107.75	-1.61	4.14e-63	4.19e-61	down	GO:0005794,Golgi apparatus; GO:0016021,integral component of membrane; GO:0016413,O-acetyltransferase activity; GO:0071554,cell wall organization or biogenesis	--	At3g14850	gb|KVI10546.1|	TBL41_ARATH, RecName: Full=Protein trichome birefringence-like 41;	A0A124SHT7_CYNCS, SubName: Full=PC-Esterase {ECO:0000313|EMBL:KVI10546.1};
TRINITY_DN104434_c1_g3	925.182	2495.94	-1.43	4.15e-63	4.19e-61	down	--	--	--	--	--	--
TRINITY_DN107861_c1_g2	12963.6	1429.42	3.18	4.86e-63	4.89e-61	up	GO:0005829,cytosol; GO:0008732,L-allo-threonine aldolase activity; GO:0004793,threonine aldolase activity; GO:0006545,glycine biosynthetic process; GO:0006567,threonine catabolic process	K01620: ltaE; threonine aldolase [EC:4.1.2.48]	At1g08630	gb|PLY82422.1|	THA1_ARATH, RecName: Full=Probable low-specificity L-threonine aldolase 1; EC=4.1.2.48; AltName: Full=Threonine aldolase 1;	A0A118K5S9_CYNCS, SubName: Full=Aromatic amino acid beta-eliminating lyase/threonine aldolase {ECO:0000313|EMBL:KVI09587.1};
TRINITY_DN96849_c1_g2	5390.22	564.025	3.26	7.32e-63	7.36e-61	up	--	--	--	--	--	--
TRINITY_DN97729_c0_g1	867.329	362.153	1.26	2.15e-62	2.16e-60	up	GO:0005739,mitochondrion; GO:0005507,copper ion binding; GO:0004491,methylmalonate-semialdehyde dehydrogenase (acylating) activity; GO:0006979,response to oxidative stress	K00140: mmsA, iolA, ALDH6A1; malonate-semialdehyde dehydrogenase (acetylating) / methylmalonate-semialdehyde dehydrogenase [EC:1.2.1.18 1.2.1.27]	At2g14170	ref|XP_021990626.1|	MMSA_ARATH, RecName: Full=Methylmalonate-semialdehyde dehydrogenase [acylating], mitochondrial; Short=MM-ALDH; Short=MMSDH; Short=Malonate-semialdehyde dehydrogenase [acylating]; EC=1.2.1.27; AltName: Full=Aldehyde dehydrogenase family 6 member B2; Flags: Precursor;	A0A251TQJ6_HELAN, SubName: Full=Putative aldehyde dehydrogenase 6B2 {ECO:0000313|EMBL:OTG13390.1};
TRINITY_DN106297_c0_g1	427.41	1231.14	-1.53	2.2e-62	2.21e-60	down	GO:0005737,cytoplasm; GO:0005634,nucleus; GO:0003700,DNA binding transcription factor activity; GO:0043565,sequence-specific DNA binding; GO:0006355,regulation of transcription, DNA-templated; GO:0006351,transcription, DNA-templated	--	At5g52510	gb|KVI04693.1|	SCL8_ARATH, RecName: Full=Scarecrow-like protein 8; Short=AtSCL8; AltName: Full=GRAS family protein 30; Short=AtGRAS-30;	A0A118K2P2_CYNCS, SubName: Full=Transcription factor GRAS {ECO:0000313|EMBL:KVI04693.1};
TRINITY_DN106930_c2_g2	56.7562	552.082	-3.28	2.76e-62	2.76e-60	down	GO:0009535,chloroplast thylakoid membrane; GO:0016021,integral component of membrane; GO:0009522,photosystem I; GO:0009523,photosystem II; GO:0016168,chlorophyll binding; GO:0046872,metal ion binding; GO:0009765,photosynthesis, light harvesting; GO:0018298,protein-chromophore linkage	K08912: LHCB1; light-harvesting complex II chlorophyll a/b binding protein 1	At1g29930	ref|XP_021976551.1|	CB21_TOBAC, RecName: Full=Chlorophyll a-b binding protein 16, chloroplastic; AltName: Full=LHCII type I CAB-16; Short=LHCP; Flags: Precursor;	A0A251VQ34_HELAN, RecName: Full=Chlorophyll a-b binding protein, chloroplastic {ECO:0000256|RuleBase:RU363080};
TRINITY_DN108309_c1_g3	27442.9	1472.34	4.22	3.62e-62	3.62e-60	up	--	--	--	--	--	--
TRINITY_DN107457_c0_g1	176.282	989.261	-2.49	4.5e-62	4.49e-60	down	--	--	At1g76020	gb|KVI07744.1|	--	A0A103YEQ6_CYNCS, SubName: Full=Thioredoxin-like fold {ECO:0000313|EMBL:KVI07744.1};
TRINITY_DN105788_c0_g1	2823.66	233.302	3.6	4.68e-62	4.65e-60	up	GO:0005737,cytoplasm; GO:0016020,membrane; GO:0047372,acylglycerol lipase activity; GO:0016298,lipase activity; GO:0004620,phospholipase activity; GO:0071456,cellular response to hypoxia; GO:0051607,defense response to virus; GO:0016042,lipid catabolic process; GO:0006629,lipid metabolic process; GO:0031408,oxylipin biosynthetic process; GO:0009626,plant-type hypersensitive response; GO:0046686,r…	--	At2g26560	gb|KVH98361.1|	PLP2_ARATH, RecName: Full=Patatin-like protein 2; Short=AtPLP2; EC=3.1.1.-; AltName: Full=Patatin-related phospholipase A IIalpha; Short=pPLAIIa; AltName: Full=Phospholipase A IIA; Short=AtPLAIIA;	A0A103XWV6_CYNCS, RecName: Full=Patatin {ECO:0000256|RuleBase:RU361262}; EC=3.1.1.- {ECO:0000256|RuleBase:RU361262};
TRINITY_DN100392_c5_g2	525.789	5829.36	-3.47	4.69e-62	4.65e-60	down	--	--	At5g06380	gb|KVH90557.1|	--	A0A103XH30_CYNCS, SubName: Full=Uncharacterized protein {ECO:0000313|EMBL:KVH90557.1};
TRINITY_DN100224_c5_g1	18.9287	296.899	-3.97	5.23e-62	5.18e-60	down	--	K07441: ALG14; beta-1,4-N-acetylglucosaminyltransferase [EC:2.4.1.141]	--	gb|KVH87678.1|	--	A0A103XBI6_CYNCS, SubName: Full=Uncharacterized protein {ECO:0000313|EMBL:KVH87678.1};
TRINITY_DN105047_c3_g6	3.28483	727.855	-7.83	5.5e-62	5.43e-60	down	--	--	--	--	--	--
TRINITY_DN108246_c1_g4	10180.6	856.552	3.57	7.56e-62	7.45e-60	up	--	--	--	--	--	--
TRINITY_DN105309_c2_g3	902.06	3636.36	-2.01	8.92e-62	8.78e-60	down	GO:0005829,cytosol; GO:0016020,membrane; GO:0005886,plasma membrane; GO:0009506,plasmodesma; GO:0004372,glycine hydroxymethyltransferase activity; GO:0030170,pyridoxal phosphate binding; GO:0007623,circadian rhythm; GO:0019264,glycine biosynthetic process from serine; GO:0046686,response to cadmium ion; GO:0035999,tetrahydrofolate interconversion	K00600: glyA, SHMT; glycine hydroxymethyltransferase [EC:2.1.2.1]	At4g13930	gb|PLY90815.1|	GLYC4_ARATH, RecName: Full=Serine hydroxymethyltransferase 4; Short=AtSHMT4; EC=2.1.2.1; AltName: Full=Glycine hydroxymethyltransferase 4; AltName: Full=Serine methylase 4;	A0A251SAW2_HELAN, RecName: Full=Serine hydroxymethyltransferase {ECO:0000256|RuleBase:RU000585}; EC=2.1.2.1 {ECO:0000256|RuleBase:RU000585};
TRINITY_DN104024_c2_g6	1655.8	9516.35	-2.52	1.12e-61	1.1e-59	down	--	--	--	--	--	--
TRINITY_DN103308_c0_g7	8848.34	20462.7	-1.21	1.48e-61	1.45e-59	down	--	--	--	--	--	--
TRINITY_DN100230_c1_g5	783.102	2738.06	-1.81	1.56e-61	1.53e-59	down	GO:0052595,aliphatic-amine oxidase activity; GO:0052594,aminoacetone:oxygen oxidoreductase(deaminating) activity; GO:0005507,copper ion binding; GO:0052596,phenethylamine:oxygen oxidoreductase (deaminating) activity; GO:0008131,primary amine oxidase activity; GO:0048038,quinone binding; GO:0052593,tryptamine:oxygen oxidoreductase (deaminating) activity; GO:0009738,abscisic acid-activated signalin…	K00276: AOC3, AOC2, tynA; primary-amine oxidase [EC:1.4.3.21]	At4g12280	gb|KVH91911.1|	AMO_ARATH, RecName: Full=Primary amine oxidase; EC=1.4.3.21 {ECO:0000250|UniProtKB:P46883}; AltName: Full=Amine oxidase [copper-containing]; Flags: Precursor;	A0A103XJJ1_CYNCS, RecName: Full=Amine oxidase {ECO:0000256|RuleBase:RU000672}; EC=1.4.3.- {ECO:0000256|RuleBase:RU000672};
TRINITY_DN96839_c1_g2	894.721	41.7748	4.42	3.37e-61	3.29e-59	up	GO:0047172,shikimate O-hydroxycinnamoyltransferase activity	K13065: E2.3.1.133, HCT; shikimate O-hydroxycinnamoyltransferase [EC:2.3.1.133]	At5g48930	gb|KVH99042.1|	HST_TOBAC, RecName: Full=Shikimate O-hydroxycinnamoyltransferase; EC=2.3.1.133; AltName: Full=Hydroxycinnamoyl transferase; AltName: Full=Hydroxycinnamoyl-Coenzyme A shikimate/quinate hydroxycinnamoyltransferase;	A0A118JZ82_CYNCS, SubName: Full=Chloramphenicol acetyltransferase-like domain-containing protein {ECO:0000313|EMBL:KVH99042.1};
TRINITY_DN96941_c1_g3	3067.54	867.998	1.82	5.01e-61	4.88e-59	up	GO:0006952,defense response; GO:0009607,response to biotic stimulus	--	--	gb|KVH96493.1|	RAP_TAROF, RecName: Full=Root allergen protein; Short=RAP;	A0A103XTD1_CYNCS, SubName: Full=Bet v I domain-containing protein {ECO:0000313|EMBL:KVH96493.1};
TRINITY_DN107771_c0_g1	502.041	3352.59	-2.74	8.05e-61	7.83e-59	down	--	--	--	--	--	--
TRINITY_DN108044_c8_g1	96.6442	603.258	-2.64	8.38e-61	8.14e-59	down	GO:0005887,integral component of plasma membrane; GO:0008271,secondary active sulfate transmembrane transporter activity; GO:0015116,sulfate transmembrane transporter activity; GO:0015293,symporter activity	--	At1g23090	gb|PLY96011.1|	SUT33_ARATH, RecName: Full=Probable sulfate transporter 3.3; AltName: Full=AST91;	A0A251S3K5_HELAN, SubName: Full=Putative sulfate transporter 91 {ECO:0000313|EMBL:OTF93194.1};
TRINITY_DN100581_c0_g1	29.6345	298.543	-3.33	1.03e-60	9.99e-59	down	--	--	At2g34510	gb|KVH88326.1|	--	A0A103XCV3_CYNCS, SubName: Full=Uncharacterized protein {ECO:0000313|EMBL:KVH88326.1};
TRINITY_DN107282_c4_g6	10261.6	1237.6	3.05	1.07e-60	1.04e-58	up	GO:0006952,defense response; GO:0009607,response to biotic stimulus	--	--	gb|KVH96473.1|	RAP_TAROF, RecName: Full=Root allergen protein; Short=RAP;	A0A103XT99_CYNCS, SubName: Full=Bet v I domain-containing protein {ECO:0000313|EMBL:KVH96473.1};
TRINITY_DN106479_c0_g2	344.993	842.249	-1.29	1.17e-60	1.13e-58	down	--	--	At3g24460	gb|PLY72203.1|	--	A0A072TW54_MEDTR, SubName: Full=Serinc-domain serine and sphingolipid biosynthesis protein {ECO:0000313|EMBL:KEH21361.1};
TRINITY_DN108088_c4_g2	465.456	27.3009	4.08	1.17e-60	1.13e-58	up	--	--	--	--	--	--
TRINITY_DN102348_c3_g1	253.26	3389.79	-3.74	1.35e-60	1.29e-58	down	--	--	--	--	--	--
TRINITY_DN98906_c3_g2	659.44	1481.21	-1.17	1.58e-60	1.52e-58	down	--	--	At1g59650	gb|PLY99211.1|	--	A0A251TXQ5_HELAN, SubName: Full=Uncharacterized protein {ECO:0000313|EMBL:OTG15918.1};
TRINITY_DN98668_c0_g2	54.2692	472.093	-3.13	1.68e-60	1.61e-58	down	--	--	--	gb|KVH93132.1|	--	A0A124SC98_CYNCS, SubName: Full=Uncharacterized protein {ECO:0000313|EMBL:KVH93132.1};
TRINITY_DN96294_c2_g4	115.236	968.613	-3.07	2.47e-60	2.36e-58	down	GO:0005768,endosome; GO:0005794,Golgi apparatus; GO:0032580,Golgi cisterna membrane; GO:0000139,Golgi membrane; GO:0016021,integral component of membrane; GO:0016020,membrane; GO:0005886,plasma membrane; GO:0005802,trans-Golgi network; GO:0008460,dTDP-glucose 4,6-dehydratase activity; GO:0070403,NAD+ binding; GO:0048040,UDP-glucuronate decarboxylase activity; GO:0042732,D-xylose metabolic process…	K08678: UXS1, uxs; UDP-glucuronate decarboxylase [EC:4.1.1.35]	At3g62830	ref|XP_021999067.1|	UXS2_ARATH, RecName: Full=UDP-glucuronic acid decarboxylase 2; EC=4.1.1.35; AltName: Full=UDP-XYL synthase 2; AltName: Full=UDP-glucuronate decarboxylase 2; Short=UGD; Short=UXS-2; AltName: Full=dTDP-glucose 4-6-dehydratase homolog D18;	A0A103FGS7_CYNCS, SubName: Full=NAD-dependent epimerase/dehydratase {ECO:0000313|EMBL:KVE52591.1};
TRINITY_DN105407_c6_g3	0	117209	-19.34	2.58e-60	2.46e-58	down	--	--	--	--	--	--
TRINITY_DN95424_c0_g2	626.287	2367.74	-1.92	3.26e-60	3.11e-58	down	GO:0005886,plasma membrane; GO:0005509,calcium ion binding; GO:0050832,defense response to fungus	K13448: CML; calcium-binding protein CML	At3g10190	gb|KVH95012.1|	CML36_ARATH, RecName: Full=Probable calcium-binding protein CML36; AltName: Full=Calmodulin-like protein 36;	A0A103XQG1_CYNCS, SubName: Full=Calcium-binding EF-hand {ECO:0000313|EMBL:KVH95012.1};
TRINITY_DN105659_c0_g1	410.298	1617.97	-1.98	3.74e-60	3.56e-58	down	GO:0005829,cytosol; GO:0004489,methylenetetrahydrofolate reductase (NAD(P)H) activity; GO:0006555,methionine metabolic process; GO:0006730,one-carbon metabolic process; GO:0035999,tetrahydrofolate interconversion	K00297: metF, MTHFR; methylenetetrahydrofolate reductase (NADPH) [EC:1.5.1.20]	At3g59970	ref|XP_022035724.1|	MTHR_ORYSJ, RecName: Full=Probable methylenetetrahydrofolate reductase; EC=1.5.1.20;	A0A251V117_HELAN, RecName: Full=Methylenetetrahydrofolate reductase {ECO:0000256|RuleBase:RU003862}; EC=1.5.1.20 {ECO:0000256|RuleBase:RU003862};
TRINITY_DN96849_c1_g3	2288.61	72.9265	4.97	4.22e-60	4.01e-58	up	GO:0006952,defense response; GO:0009607,response to biotic stimulus	--	At1g24020	gb|KVH96454.1|	RAP_TAROF, RecName: Full=Root allergen protein; Short=RAP;	A0A103XT85_CYNCS, SubName: Full=Uncharacterized protein {ECO:0000313|EMBL:KVH96454.1};
TRINITY_DN100539_c2_g1	698.114	1551.32	-1.15	4.63e-60	4.39e-58	down	GO:0005737,cytoplasm; GO:0034045,phagophore assembly site membrane; GO:0005774,vacuolar membrane; GO:0006914,autophagy; GO:0015031,protein transport; GO:0042594,response to starvation; GO:0016192,vesicle-mediated transport	--	At5g54730	ref|XP_022039456.1|	AT18F_ARATH, RecName: Full=Autophagy-related protein 18f; Short=AtATG18f;	A0A251U7U5_HELAN, SubName: Full=Putative quinoprotein alcohol dehydrogenase-like superfamily {ECO:0000313|EMBL:OTG19428.1};
TRINITY_DN98545_c8_g1	2.9305	714.324	-7.95	4.08e-59	3.86e-57	down	--	--	--	--	--	--
TRINITY_DN104413_c2_g1	977.32	234.562	2.06	4.46e-59	4.21e-57	up	GO:0009507,chloroplast; GO:0009570,chloroplast stroma; GO:0003855,3-dehydroquinate dehydratase activity; GO:0050661,NADP binding; GO:0004764,shikimate 3-dehydrogenase (NADP+) activity; GO:0009073,aromatic amino acid family biosynthetic process; GO:0009423,chorismate biosynthetic process; GO:0009793,embryo development ending in seed dormancy; GO:0019632,shikimate metabolic process	K13832: aroDE, DHQ-SDH; 3-dehydroquinate dehydratase / shikimate dehydrogenase [EC:4.2.1.10 1.1.1.25]	At3g06350	gb|PLY93992.1|	DHQSD_ARATH, RecName: Full=Bifunctional 3-dehydroquinate dehydratase/shikimate dehydrogenase, chloroplastic; Short=DHQ-SDH protein; AltName: Full=DHQase-SORase; AltName: Full=Protein EMBRYO DEFECTIVE 3004; Includes: RecName: Full=Dehydroquinate dehydratase; Short=DHQ; EC=4.2.1.10; Includes: RecName: Full=Shikimate dehydrogenase; Short=SDH; EC=1.1.1.25; Flags: Precursor;	A0A118JUA0_CYNCS, SubName: Full=Aldolase-type TIM barrel {ECO:0000313|EMBL:KVH92227.1};
TRINITY_DN103920_c0_g1	459.353	4959.06	-3.43	5.47e-59	5.16e-57	down	GO:0005737,cytoplasm; GO:0005874,microtubule; GO:0005634,nucleus; GO:0005516,calmodulin binding; GO:0008017,microtubule binding	--	At3g09710	gb|KVI06899.1|	IQD1_ARATH, RecName: Full=Protein IQ-DOMAIN 1 {ECO:0000303|PubMed:15960618};	A0A103YD42_CYNCS, SubName: Full=IQ motif, EF-hand binding site-containing protein {ECO:0000313|EMBL:KVI06899.1};
TRINITY_DN106118_c1_g2	85.3954	686.176	-3	5.94e-59	5.59e-57	down	GO:0055028,cortical microtubule; GO:0005737,cytoplasm; GO:0005524,ATP binding; GO:0008017,microtubule binding; GO:0003777,microtubule motor activity; GO:0071555,cell wall organization; GO:0007018,microtubule-based movement	--	At5g47820	gb|KVH98313.1|	KN4A_GOSHI, RecName: Full=Kinesin-like protein KIN-4A {ECO:0000305}; AltName: Full=GhKINESIN-4A {ECO:0000303|PubMed:25600279};	A0A103XWR0_CYNCS, SubName: Full=Kinesin, motor domain-containing protein {ECO:0000313|EMBL:KVH98313.1};
TRINITY_DN106460_c9_g2	752.642	2145.17	-1.51	6.58e-59	6.18e-57	down	--	--	--	--	--	--
TRINITY_DN99145_c1_g2	272.411	18.6811	3.86	6.83e-59	6.41e-57	up	GO:0016747,transferase activity, transferring acyl groups other than amino-acyl groups	--	At5g42830	gb|KVH98309.1|	Y3028_ARATH, RecName: Full=Uncharacterized acetyltransferase At3g50280; EC=2.3.1.-;	A0A103XWS7_CYNCS, SubName: Full=Chloramphenicol acetyltransferase-like domain-containing protein {ECO:0000313|EMBL:KVH98309.1};
TRINITY_DN101053_c5_g2	299.898	780.836	-1.38	8.55e-59	8e-57	down	GO:0005618,cell wall; GO:0005576,extracellular region; GO:0005794,Golgi apparatus; GO:0009505,plant-type cell wall; GO:0009506,plasmodesma; GO:0004252,serine-type endopeptidase activity	--	At2g05920	gb|KVH94000.1|	SBT18_ARATH, RecName: Full=Subtilisin-like protease SBT1.8 {ECO:0000303|PubMed:16193095}; EC=3.4.21.- {ECO:0000255|PROSITE-ProRule:PRU10082}; AltName: Full=Subtilase subfamily 1 member 8 {ECO:0000303|PubMed:16193095}; Short=AtSBT1.8 {ECO:0000303|PubMed:16193095}; Flags: Precursor;	A0A124SCJ4_CYNCS, SubName: Full=Peptidase S8/S53 domain-containing protein {ECO:0000313|EMBL:KVH94000.1};
TRINITY_DN105544_c0_g3	1017.13	63.4259	4	8.65e-59	8.08e-57	up	GO:0016021,integral component of membrane; GO:0005886,plasma membrane; GO:0015591,D-ribose transmembrane transporter activity; GO:0015148,D-xylose transmembrane transporter activity; GO:0005354,galactose transmembrane transporter activity; GO:0005355,glucose transmembrane transporter activity; GO:0015168,glycerol transmembrane transporter activity; GO:0015575,mannitol transmembrane transporter ac…	--	At3g18830	ref|XP_022029290.1|	PLT5_ARATH, RecName: Full=Polyol transporter 5; AltName: Full=Protein POLYOL TRANSPORTER 5; Short=AtPLT5; AltName: Full=Sugar-proton symporter PLT5;	A0A251V9E4_HELAN, SubName: Full=Putative polyol/monosaccharide transporter 1 {ECO:0000313|EMBL:OTG32237.1};
TRINITY_DN100810_c2_g6	74.6721	405.301	-2.44	1.66e-58	1.55e-56	down	GO:0035251,UDP-glucosyltransferase activity; GO:0008152,metabolic process	--	At1g22400	gb|KVI04107.1|	UGT2_GARJA, RecName: Full=7-deoxyloganetin glucosyltransferase; EC=2.4.1.324; AltName: Full=Genipin glucosyltransferase; AltName: Full=UDP-glucose glucosyltransferase 2; Short=GjUGT2; AltName: Full=UDP-glycosyltransferase 85A24;	A0A103Y7T5_CYNCS, RecName: Full=Glycosyltransferase {ECO:0000256|RuleBase:RU362057}; EC=2.4.1.- {ECO:0000256|RuleBase:RU362057};
TRINITY_DN97677_c0_g1	3.76533	650.723	-7.4	2.15e-58	2e-56	down	--	--	--	--	--	--
TRINITY_DN101611_c3_g2	90.9312	651.292	-2.84	2.38e-58	2.21e-56	down	GO:0005622,intracellular; GO:0005524,ATP binding; GO:0004672,protein kinase activity; GO:0004674,protein serine/threonine kinase activity; GO:0035556,intracellular signal transduction; GO:0018105,peptidyl-serine phosphorylation; GO:0018107,peptidyl-threonine phosphorylation; GO:0006468,protein phosphorylation; GO:0009268,response to pH	--	At2g30360	gb|KVH94124.1|	CIPKB_ARATH, RecName: Full=CBL-interacting serine/threonine-protein kinase 11; EC=2.7.11.1; AltName: Full=SNF1-related kinase 3.22; AltName: Full=SOS2-like protein kinase PKS5; AltName: Full=SOS3-interacting protein 4;	A0A103XP49_CYNCS, RecName: Full=Non-specific serine/threonine protein kinase {ECO:0000256|SAAS:SAAS00351747}; EC=2.7.11.1 {ECO:0000256|SAAS:SAAS00351747};
TRINITY_DN108460_c6_g2	3030.62	11472.7	-1.92	2.46e-58	2.28e-56	down	--	--	--	--	--	--
TRINITY_DN107310_c4_g1	7011.28	1879.7	1.9	6.68e-58	6.17e-56	up	GO:0005783,endoplasmic reticulum; GO:0016021,integral component of membrane; GO:0016020,membrane; GO:0020037,heme binding; GO:0005506,iron ion binding; GO:0004497,monooxygenase activity; GO:0016709,oxidoreductase activity, acting on paired donors, with incorporation or reduction of molecular oxygen, NAD(P)H as one donor, and incorporation of one atom of oxygen; GO:0009809,lignin biosynthetic proc…	K09755: CYP84A, F5H; ferulate-5-hydroxylase [EC:1.14.-.-]	At4g36220	gb|PLY63818.1|	C84A1_ARATH, RecName: Full=Cytochrome P450 84A1; EC=1.14.-.-; AltName: Full=Ferulate-5-hydroxylase; Short=F5H;	A0A124SC11_CYNCS, SubName: Full=Cytochrome P450 {ECO:0000313|EMBL:KVH92322.1};
TRINITY_DN95731_c2_g3	282.657	23.2699	3.61	7.3e-58	6.74e-56	up	GO:0016021,integral component of membrane; GO:0005886,plasma membrane; GO:0005524,ATP binding; GO:0004674,protein serine/threonine kinase activity	K04733: IRAK4; interleukin-1 receptor-associated kinase 4 [EC:2.7.11.1]	At1g53440	gb|KVI10527.1|	Y5344_ARATH, RecName: Full=Probable LRR receptor-like serine/threonine-protein kinase At1g53440; EC=2.7.11.1; Flags: Precursor;	A0A103YK29_CYNCS, SubName: Full=Concanavalin A-like lectin/glucanase, subgroup {ECO:0000313|EMBL:KVI10527.1};
TRINITY_DN104583_c3_g4	296.458	11.089	4.74	9.73e-58	8.96e-56	up	GO:0012505,endomembrane system; GO:0019897,extrinsic component of plasma membrane; GO:0016020,membrane; GO:0005886,plasma membrane; GO:0010204,defense response signaling pathway, resistance gene-independent; GO:0009816,defense response to bacterium, incompatible interaction; GO:0034051,negative regulation of plant-type hypersensitive response; GO:0009626,plant-type hypersensitive response; GO:000…	K13456: RIN4; RPM1-interacting protein 4	At3g25070	gb|KVH94247.1|	RIN4_ARATH, RecName: Full=RPM1-interacting protein 4;	A0A103XP03_CYNCS, SubName: Full=Pathogenic type III effector avirulence factor Avr cleavage site-containing protein {ECO:0000313|EMBL:KVH94247.1}; Flags: Fragment;
TRINITY_DN75477_c0_g1	34.3572	397.362	-3.53	1.03e-57	9.49e-56	down	--	--	--	gb|PLY72404.1|	--	A0A251VAZ0_HELAN, SubName: Full=Putative F-box domain, Leucine-rich repeat domain, L domain-like protein {ECO:0000313|EMBL:OTG32765.1};
TRINITY_DN99461_c2_g2	92.7834	1709.44	-4.2	1.56e-57	1.43e-55	down	GO:0016021,integral component of membrane; GO:0030133,transport vesicle; GO:0017022,myosin binding	--	At5g06560	gb|KVH90528.1|	MYOB7_ARATH, RecName: Full=Myosin-binding protein 7 {ECO:0000303|PubMed:23995081};	A0A103XGW4_CYNCS, SubName: Full=Zein-binding domain-containing protein {ECO:0000313|EMBL:KVH90528.1};
TRINITY_DN98450_c1_g1	261.133	1814.36	-2.8	1.99e-57	1.82e-55	down	GO:0046658,anchored component of plasma membrane; GO:0005886,plasma membrane; GO:0008081,phosphoric diester hydrolase activity; GO:0006629,lipid metabolic process	--	At1g13680	gb|PLY97059.1|	Y5713_ARATH, RecName: Full=PI-PLC X domain-containing protein At5g67130; Flags: Precursor;	A0A251TZ36_HELAN, SubName: Full=Putative PLC-like phosphodiesterases superfamily protein {ECO:0000313|EMBL:OTG15842.1};
TRINITY_DN101474_c5_g1	2716.92	63.822	5.41	2.36e-57	2.15e-55	up	--	--	--	--	--	--
TRINITY_DN105936_c1_g4	705.218	46.0863	3.94	3.28e-57	2.99e-55	up	GO:0016021,integral component of membrane; GO:0005886,plasma membrane; GO:0015591,D-ribose transmembrane transporter activity; GO:0015148,D-xylose transmembrane transporter activity; GO:0005354,galactose transmembrane transporter activity; GO:0005355,glucose transmembrane transporter activity; GO:0015168,glycerol transmembrane transporter activity; GO:0015575,mannitol transmembrane transporter ac…	--	At3g18830	gb|KVH93239.1|	PLT5_ARATH, RecName: Full=Polyol transporter 5; AltName: Full=Protein POLYOL TRANSPORTER 5; Short=AtPLT5; AltName: Full=Sugar-proton symporter PLT5;	A0A103XMJ5_CYNCS, SubName: Full=General substrate transporter {ECO:0000313|EMBL:KVH93239.1}; Flags: Fragment;
TRINITY_DN105675_c1_g2	44.7557	328.263	-2.88	3.31e-57	3.01e-55	down	--	--	--	--	--	--
TRINITY_DN99668_c7_g4	496.528	80.9815	2.61	3.99e-57	3.62e-55	up	--	--	--	--	--	--
TRINITY_DN103564_c2_g5	354.298	38.6309	3.2	4.65e-57	4.21e-55	up	GO:0016021,integral component of membrane; GO:0005886,plasma membrane; GO:0005524,ATP binding; GO:0030246,carbohydrate binding; GO:0004674,protein serine/threonine kinase activity; GO:0006468,protein phosphorylation	K04733: IRAK4; interleukin-1 receptor-associated kinase 4 [EC:2.7.11.1]	At5g60900	gb|KVI00248.1|	LERK4_ORYSJ, RecName: Full=G-type lectin S-receptor-like serine/threonine-protein kinase LECRK4 {ECO:0000305}; Short=OsLecRK4 {ECO:0000303|PubMed:25485617}; EC=2.7.11.1 {ECO:0000305}; AltName: Full=OsRLCK136 {ECO:0000303|PubMed:19825577}; Flags: Precursor;	A0A103Y0G1_CYNCS, SubName: Full=Bulb-type lectin domain-containing protein {ECO:0000313|EMBL:KVI00248.1};
TRINITY_DN95785_c4_g5	122.754	2115.8	-4.11	5.88e-57	5.32e-55	down	--	--	--	--	--	--
TRINITY_DN106310_c7_g1	76.5978	384.358	-2.33	6.24e-57	5.63e-55	down	GO:0005634,nucleus; GO:0003677,DNA binding; GO:0046983,protein dimerization activity; GO:0006355,regulation of transcription, DNA-templated; GO:0006351,transcription, DNA-templated	K04733: IRAK4; interleukin-1 receptor-associated kinase 4 [EC:2.7.11.1]	At1g59640	gb|KVI05572.1|	BH094_ORYSJ, RecName: Full=Transcription factor BHLH094 {ECO:0000305}; AltName: Full=Basic helix-loop-helix protein 94 {ECO:0000303|PubMed:16896230}; Short=OsbHLH094 {ECO:0000303|PubMed:16896230}; AltName: Full=bHLH transcription factor bHLH094 {ECO:0000305};	A0A103YAK9_CYNCS, SubName: Full=Myc-type, basic helix-loop-helix (BHLH) domain-containing protein {ECO:0000313|EMBL:KVI05572.1};
TRINITY_DN101911_c0_g2	1073.77	7187.56	-2.74	7.08e-57	6.38e-55	down	GO:0005576,extracellular region; GO:0016788,hydrolase activity, acting on ester bonds; GO:0016042,lipid catabolic process	--	At5g45950	gb|KVI00995.1|	GDL85_ARATH, RecName: Full=GDSL esterase/lipase At5g45950; EC=3.1.1.-; AltName: Full=Extracellular lipase At5g45950; Flags: Precursor;	A0A103Y1V2_CYNCS, SubName: Full=Lipase, GDSL {ECO:0000313|EMBL:KVI00995.1};
TRINITY_DN98992_c0_g1	244.575	765.219	-1.64	8.18e-57	7.36e-55	down	GO:0005829,cytosol; GO:0005634,nucleus; GO:0005525,GTP binding; GO:0004475,mannose-1-phosphate guanylyltransferase activity; GO:0030244,cellulose biosynthetic process; GO:0042742,defense response to bacterium; GO:0009298,GDP-mannose biosynthetic process; GO:0019853,L-ascorbic acid biosynthetic process; GO:0060359,response to ammonium ion; GO:0009408,response to heat; GO:0009753,response to jasmon…	K00966: GMPP; mannose-1-phosphate guanylyltransferase [EC:2.7.7.13]	At2g39770	gb|OTF96647.1|	GMPP1_ARATH, RecName: Full=Mannose-1-phosphate guanylyltransferase 1; EC=2.7.7.13; AltName: Full=GDP-mannose pyrophosphorylase 1; AltName: Full=Protein CYTOKINESIS DEFECTIVE 1; AltName: Full=Protein EMBRYO DEFECTIVE 101; AltName: Full=Protein HYPERSENSITIVE TO AMMONIUM ION 1; AltName: Full=Protein SENSITIVE TO OZONE 1; AltName: Full=Protein VITAMIN C DEFECTIVE 1;	A0A251SCR9_HELAN, SubName: Full=Putative mannose-1-phosphate guanylyltransferase 1 {ECO:0000313|EMBL:OTF96647.1};
TRINITY_DN103161_c0_g2	154.273	520.857	-1.76	1.04e-56	9.37e-55	down	GO:0012505,endomembrane system; GO:0016021,integral component of membrane; GO:0005886,plasma membrane; GO:0031201,SNARE complex; GO:0005484,SNAP receptor activity; GO:0000149,SNARE binding; GO:0006887,exocytosis; GO:0006886,intracellular protein transport; GO:0048278,vesicle docking; GO:0006906,vesicle fusion	K08486: STX1B_2_3; syntaxin 1B/2/3	At3g03800	gb|KVI00031.1|	SY131_ARATH, RecName: Full=Putative syntaxin-131; Short=AtSYP131;	A0A124SEG3_CYNCS, SubName: Full=Syntaxin/epimorphin, conserved site-containing protein {ECO:0000313|EMBL:KVI00031.1};
TRINITY_DN108237_c1_g1	692.128	51.5553	3.75	1.21e-56	1.09e-54	up	GO:0004190,aspartic-type endopeptidase activity; GO:0004519,endonuclease activity; GO:0003676,nucleic acid binding; GO:0003964,RNA-directed DNA polymerase activity; GO:0008270,zinc ion binding; GO:0015074,DNA integration	K03006: RPB1, POLR2A; DNA-directed RNA polymerase II subunit RPB1 [EC:2.7.7.6]	At5g35820	gb|KYP66486.1|	POLX_TOBAC, RecName: Full=Retrovirus-related Pol polyprotein from transposon TNT 1-94; Includes: RecName: Full=Protease; EC=3.4.23.-; Includes: RecName: Full=Reverse transcriptase; EC=2.7.7.49; Includes: RecName: Full=Endonuclease;	A0A151THM1_CAJCA, SubName: Full=Retrovirus-related Pol polyprotein from transposon TNT 1-94 {ECO:0000313|EMBL:KYP66486.1};
TRINITY_DN102005_c0_g1	1.526	1987.86	-10.28	1.46e-56	1.31e-54	down	GO:0005618,cell wall; GO:0005576,extracellular region; GO:0047911,galacturan 1,4-alpha-galacturonidase activity; GO:0019863,IgE binding; GO:0004650,polygalacturonase activity; GO:0071555,cell wall organization; GO:0045490,pectin catabolic process	K01213: E3.2.1.67; galacturan 1,4-alpha-galacturonidase [EC:3.2.1.67]	At3g07850	gb|KVI10636.1|	PGLR2_PLAAC, RecName: Full=Exopolygalacturonase; EC=3.2.1.67; AltName: Full=Pollen allergen Pla a 2; AltName: Allergen=Pla a 2; Flags: Precursor; Fragment;	A0A124SHU5_CYNCS, SubName: Full=Glycoside hydrolase, family 28 {ECO:0000313|EMBL:KVI10636.1}; Flags: Fragment;
TRINITY_DN103131_c0_g1	732.578	46.4026	3.98	1.5e-56	1.34e-54	up	GO:0004353,glutamate dehydrogenase [NAD(P)+] activity; GO:0006520,cellular amino acid metabolic process	K00261: GLUD1_2, gdhA; glutamate dehydrogenase (NAD(P)+) [EC:1.4.1.3]	At5g18170	gb|PLY96475.1|	DHEB_NICPL, RecName: Full=Glutamate dehydrogenase B; Short=GDH B; EC=1.4.1.3;	A0A251TXX1_HELAN, RecName: Full=Glutamate dehydrogenase {ECO:0000256|PIRNR:PIRNR000185};
TRINITY_DN102190_c2_g8	12.1914	271.946	-4.48	1.89e-56	1.69e-54	down	GO:0009507,chloroplast; GO:0000287,magnesium ion binding; GO:0034008,R-linalool synthase activity; GO:0010333,terpene synthase activity; GO:0033383,geranyl diphosphate metabolic process; GO:0009611,response to wounding; GO:0016114,terpenoid biosynthetic process	K07385: TPS-Cin; 1,8-cineole synthase [EC:4.2.3.108]	At3g25830	gb|KVG58938.1|	LLOS5_ARTAN, RecName: Full=R-linalool synthase QH5, chloroplastic; EC=4.2.3.26; Flags: Precursor;	A0A118HN81_CYNCS, SubName: Full=Terpene synthase, metal-binding domain-containing protein {ECO:0000313|EMBL:KVG58938.1}; Flags: Fragment;
TRINITY_DN105544_c0_g1	1066.78	102.274	3.38	2.08e-56	1.85e-54	up	GO:0016021,integral component of membrane; GO:0005886,plasma membrane; GO:0015591,D-ribose transmembrane transporter activity; GO:0015148,D-xylose transmembrane transporter activity; GO:0005354,galactose transmembrane transporter activity; GO:0005355,glucose transmembrane transporter activity; GO:0015168,glycerol transmembrane transporter activity; GO:0015575,mannitol transmembrane transporter ac…	--	At3g18830	gb|PLY97588.1|	PLT5_ARATH, RecName: Full=Polyol transporter 5; AltName: Full=Protein POLYOL TRANSPORTER 5; Short=AtPLT5; AltName: Full=Sugar-proton symporter PLT5;	B2D0J3_ARTAN, SubName: Full=Mannitol transporter {ECO:0000313|EMBL:ACB56939.1};
TRINITY_DN95592_c2_g3	2012.05	372.087	2.43	2.12e-56	1.89e-54	up	--	--	At3g10980_2	gb|KVI04818.1|	WUN1_SOLTU, RecName: Full=Wound-induced protein 1;	A0A118K2S1_CYNCS, SubName: Full=Uncharacterized protein {ECO:0000313|EMBL:KVI04818.1};
TRINITY_DN99902_c4_g1	1764.49	5.07846	8.45	2.24e-56	1.99e-54	up	GO:0016021,integral component of membrane; GO:0005524,ATP binding; GO:0016887,ATPase activity	--	At1g15520	gb|PLY98542.1|	PDR1_TOBAC, RecName: Full=Pleiotropic drug resistance protein 1; AltName: Full=NtPDR1;	A0A251VDM0_HELAN, SubName: Full=Putative pleiotropic drug resistance protein 1 {ECO:0000313|EMBL:OTG33246.1};
TRINITY_DN104714_c1_g1	304.918	859.748	-1.49	3.54e-56	3.14e-54	down	--	K04077: groEL, HSPD1; chaperonin GroEL	At1g17620	gb|KVH92929.1|	--	A0A103XLK6_CYNCS, SubName: Full=Late embryogenesis abundant protein, LEA-14 {ECO:0000313|EMBL:KVH92929.1};
TRINITY_DN107507_c1_g1	656.185	59.7248	3.45	3.8e-56	3.36e-54	up	--	--	--	--	--	--
TRINITY_DN105898_c5_g5	11.3264	454.459	-5.31	4.39e-56	3.87e-54	down	GO:0050645,limonoid glucosyltransferase activity; GO:0008152,metabolic process	--	At4g15480	gb|KVH93327.1|	LGT_CITUN, RecName: Full=Limonoid UDP-glucosyltransferase; Short=LGTase; Short=Limonoid GTase; Short=Limonoid glucosyltransferase; EC=2.4.1.210;	A0A118JVV7_CYNCS, RecName: Full=Glycosyltransferase {ECO:0000256|RuleBase:RU362057}; EC=2.4.1.- {ECO:0000256|RuleBase:RU362057};
TRINITY_DN103782_c1_g4	3426.26	414.531	3.05	5.91e-56	5.21e-54	up	--	--	--	--	--	--
TRINITY_DN93641_c0_g4	150.203	487.85	-1.7	6.02e-56	5.3e-54	down	GO:0031225,anchored component of membrane; GO:0046658,anchored component of plasma membrane; GO:0005886,plasma membrane; GO:0009506,plasmodesma; GO:0001872,(1->3)-beta-D-glucan binding; GO:0004553,hydrolase activity, hydrolyzing O-glycosyl compounds; GO:0030247,polysaccharide binding	--	At1g18650	gb|KVH97714.1|	PDCB4_ARATH, RecName: Full=PLASMODESMATA CALLOSE-BINDING PROTEIN 4; Short=AtPDCB4; Flags: Precursor;	A0A103XVM8_CYNCS, SubName: Full=Uncharacterized protein {ECO:0000313|EMBL:KVH97714.1};
TRINITY_DN101542_c3_g1	2547.54	1043.15	1.29	8.6e-56	7.55e-54	up	GO:0009507,chloroplast; GO:0050342,tocopherol O-methyltransferase activity; GO:0010189,vitamin E biosynthetic process	K05928: E2.1.1.95; tocopherol O-methyltransferase [EC:2.1.1.95]	At1g64970	gb|AFJ49047.1|	GTOMC_ORYSJ, RecName: Full=Probable tocopherol O-methyltransferase, chloroplastic; EC=2.1.1.95; AltName: Full=Gamma-tocopherol methyltransferase; AltName: Full=Vitamin E pathway gene 4 protein; Flags: Precursor;	I2BEU3_CARTI, SubName: Full=Gamma-tocopherol methyltransferase {ECO:0000313|EMBL:AFJ49047.1};
TRINITY_DN102969_c3_g4	200.351	584.16	-1.54	9.33e-56	8.18e-54	down	GO:0005789,endoplasmic reticulum membrane; GO:0016021,integral component of membrane; GO:0031966,mitochondrial membrane; GO:0042170,plastid membrane; GO:0004420,hydroxymethylglutaryl-CoA reductase (NADPH) activity; GO:0050661,NADP binding; GO:0015936,coenzyme A metabolic process; GO:0008299,isoprenoid biosynthetic process	K00021: HMGCR; hydroxymethylglutaryl-CoA reductase (NADPH) [EC:1.1.1.34]	At1g76490	gb|KVI02967.1|	HMDH2_GOSHI, RecName: Full=3-hydroxy-3-methylglutaryl-coenzyme A reductase 2; Short=HMG-CoA reductase 2; EC=1.1.1.34;	A0A103Y5P0_CYNCS, RecName: Full=3-hydroxy-3-methylglutaryl coenzyme A reductase {ECO:0000256|RuleBase:RU361219}; Short=HMG-CoA reductase {ECO:0000256|RuleBase:RU361219}; EC=1.1.1.34 {ECO:0000256|RuleBase:RU361219};
TRINITY_DN97883_c7_g2	5322.69	1353.5	1.98	1.21e-55	1.06e-53	up	--	--	--	--	--	--
TRINITY_DN107015_c1_g5	5286.13	630.15	3.07	1.48e-55	1.29e-53	up	--	--	--	--	--	--
TRINITY_DN103097_c5_g2	733.874	153.342	2.26	1.65e-55	1.44e-53	up	GO:0005634,nucleus; GO:0003700,DNA binding transcription factor activity; GO:0043565,sequence-specific DNA binding; GO:0009738,abscisic acid-activated signaling pathway; GO:0009740,gibberellic acid mediated signaling pathway; GO:0009788,negative regulation of abscisic acid-activated signaling pathway; GO:0009938,negative regulation of gibberellic acid mediated signaling pathway; GO:0045893,positi…	K13424: WRKY33; WRKY transcription factor 33	At5g07100	gb|KVH94112.1|	WRK24_ORYSI, RecName: Full=WRKY transcription factor WRKY24 {ECO:0000303|PubMed:16919842}; Short=OsWRKY24 {ECO:0000303|PubMed:16919842};	A0A103XNQ2_CYNCS, SubName: Full=DNA-binding WRKY {ECO:0000313|EMBL:KVH94112.1};
TRINITY_DN97681_c0_g1	78.7316	400.401	-2.35	2.14e-55	1.85e-53	down	GO:0009901,anther dehiscence; GO:0006952,defense response; GO:0042742,defense response to bacterium; GO:0050832,defense response to fungus; GO:0009861,jasmonic acid and ethylene-dependent systemic resistance; GO:0009867,jasmonic acid mediated signaling pathway; GO:0031348,negative regulation of defense response; GO:0016567,protein ubiquitination; GO:0009909,regulation of flower development; GO:00…	K13463: COI-1; coronatine-insensitive protein 1	At2g39940	gb|KVI07019.1|	COI1_ARATH, RecName: Full=Coronatine-insensitive protein 1; AltName: Full=COI-1; AltName: Full=F-box/LRR-repeat protein 2; Short=AtCOI1; Short=AtFBL2;	A0A103YDC5_CYNCS, SubName: Full=Uncharacterized protein {ECO:0000313|EMBL:KVI07019.1};
TRINITY_DN103829_c0_g1	2216.34	7109.22	-1.68	2.5e-55	2.17e-53	down	--	--	--	--	--	--
TRINITY_DN98610_c0_g1	1266.4	229.893	2.46	3.03e-55	2.62e-53	up	GO:0004190,aspartic-type endopeptidase activity; GO:0004519,endonuclease activity; GO:0046872,metal ion binding; GO:0003676,nucleic acid binding; GO:0003964,RNA-directed DNA polymerase activity; GO:0015074,DNA integration; GO:0006310,DNA recombination	--	At3g25450	gb|OTG16582.1|	POLR1_ARATH, RecName: Full=Retrovirus-related Pol polyprotein from transposon RE1; AltName: Full=Retro element 1 {ECO:0000303|PubMed:10689195}; Short=AtRE1 {ECO:0000303|PubMed:10689195}; Includes: RecName: Full=Protease RE1; EC=3.4.23.-; Includes: RecName: Full=Reverse transcriptase RE1; EC=2.7.7.49; Includes: RecName: Full=Endonuclease RE1;	A0A251U1A0_HELAN, SubName: Full=Putative zinc finger, CCHC-type {ECO:0000313|EMBL:OTG16582.1};
TRINITY_DN104078_c6_g1	1850.71	4.24404	8.74	3.76e-55	3.24e-53	up	GO:0016021,integral component of membrane; GO:0005524,ATP binding; GO:0016887,ATPase activity	--	At1g15520	ref|XP_022033690.1|	PDR1_TOBAC, RecName: Full=Pleiotropic drug resistance protein 1; AltName: Full=NtPDR1;	A0A251UWL0_HELAN, SubName: Full=Putative pigment permease {ECO:0000313|EMBL:OTG27122.1};
TRINITY_DN98108_c6_g2	1531.87	36.8119	5.38	4.69e-55	4.04e-53	up	GO:0008422,beta-glucosidase activity; GO:0102483,scopolin beta-glucosidase activity; GO:0005975,carbohydrate metabolic process; GO:1901657,glycosyl compound metabolic process	K05350: bglB; beta-glucosidase [EC:3.2.1.21]	At3g60130	gb|KVI02193.1|	BGL18_ORYSJ, RecName: Full=Beta-glucosidase 18; Short=Os4bglu18; EC=3.2.1.21; Flags: Precursor;	A0A118K119_CYNCS, SubName: Full=Glycoside hydrolase, catalytic domain-containing protein {ECO:0000313|EMBL:KVI02193.1};
TRINITY_DN97265_c0_g1	2384.23	73.1938	5.03	4.99e-55	4.29e-53	up	GO:0009055,electron transfer activity; GO:0046872,metal ion binding	K04733: IRAK4; interleukin-1 receptor-associated kinase 4 [EC:2.7.11.1]	At5g20230	gb|PLY66369.1|	BCP_PEA, RecName: Full=Blue copper protein; Flags: Precursor;	A0A251SYI5_HELAN, SubName: Full=Putative cupredoxin, Blue (Type 1) copper protein, binding site {ECO:0000313|EMBL:OTG03927.1};
TRINITY_DN103930_c5_g1	714.486	52.9998	3.75	6.2e-55	5.32e-53	up	GO:0016021,integral component of membrane; GO:0016020,membrane; GO:0005345,purine nucleobase transmembrane transporter activity; GO:0006863,purine nucleobase transport	--	At1g44750	ref|XP_022028709.1|	PUP11_ARATH, RecName: Full=Probable purine permease 11; Short=AtPUP11;	A0A251V7Z2_HELAN, SubName: Full=Putative purine permease, plant {ECO:0000313|EMBL:OTG31685.1};
TRINITY_DN102656_c2_g3	31.7023	359.006	-3.49	1.44e-54	1.23e-52	down	GO:0005737,cytoplasm; GO:0005654,nucleoplasm; GO:0048471,perinuclear region of cytoplasm; GO:0003677,DNA binding; GO:0003700,DNA binding transcription factor activity; GO:0043621,protein self-association; GO:0006351,transcription, DNA-templated	K20557: VIP1; transcription factor VIP1	At2g40620	gb|PLY72057.1|	BZP18_ARATH, RecName: Full=bZIP transcription factor 18 {ECO:0000305}; Short=AtbZIP18 {ECO:0000303|PubMed:11906833}; Short=bZIP protein 18 {ECO:0000305};	A0A251TXF7_HELAN, SubName: Full=Putative basic-leucine zipper (BZIP) transcription factor family protein {ECO:0000313|EMBL:OTG15584.1};
TRINITY_DN104102_c4_g1	502.926	20.759	4.61	2.2e-54	1.87e-52	up	GO:0016021,integral component of membrane; GO:0005886,plasma membrane; GO:0030658,transport vesicle membrane; GO:0015031,protein transport	--	At1g61250	ref|XP_022041660.1|	SCAM4_ORYSJ, RecName: Full=Secretory carrier-associated membrane protein 4; Short=Secretory carrier membrane protein 4;	A0A251VKH3_HELAN, RecName: Full=Secretory carrier-associated membrane protein {ECO:0000256|RuleBase:RU363122}; Short=Secretory carrier membrane protein {ECO:0000256|RuleBase:RU363122};
TRINITY_DN99888_c0_g2	78.156	811.065	-3.37	2.43e-54	2.07e-52	down	GO:0071944,cell periphery; GO:0005576,extracellular region; GO:0016985,mannan endo-1,4-beta-mannosidase activity; GO:0046355,mannan catabolic process; GO:0009845,seed germination	K19355: MAN; mannan endo-1,4-beta-mannosidase [EC:3.2.1.78]	At5g66460	gb|KVI08819.1|	MAN7_ARATH, RecName: Full=Mannan endo-1,4-beta-mannosidase 7; EC=3.2.1.78; AltName: Full=Beta-mannanase 7; AltName: Full=Endo-beta-1,4-mannanase 7; Short=AtMAN7; Flags: Precursor;	A0A103YGS6_CYNCS, SubName: Full=Glycoside hydrolase, catalytic domain-containing protein {ECO:0000313|EMBL:KVI08819.1};
TRINITY_DN107771_c0_g3	3795.8	23198.9	-2.61	2.48e-54	2.11e-52	down	--	--	--	gb|KVH94702.1|	--	A0A118JVV8_CYNCS, SubName: Full=Bifunctional inhibitor/plant lipid transfer protein/seed storage helical domain-containing protein {ECO:0000313|EMBL:KVH94702.1};
TRINITY_DN107604_c2_g3	1805.09	80.0683	4.49	2.73e-54	2.31e-52	up	GO:0071944,cell periphery; GO:0005618,cell wall; GO:0005576,extracellular region; GO:0016020,membrane; GO:0045330,aspartyl esterase activity; GO:0030599,pectinesterase activity; GO:0046910,pectinesterase inhibitor activity; GO:0042545,cell wall modification; GO:0050829,defense response to Gram-negative bacterium; GO:0045490,pectin catabolic process; GO:0009617,response to bacterium; GO:0009620,re…	K01051: E3.1.1.11; pectinesterase [EC:3.1.1.11]	At2g45220	gb|KVH91209.1|	PME17_ARATH, RecName: Full=Probable pectinesterase/pectinesterase inhibitor 17; Includes: RecName: Full=Pectinesterase inhibitor 17; AltName: Full=Pectin methylesterase inhibitor 17; Includes: RecName: Full=Pectinesterase 17; Short=PE 17; EC=3.1.1.11; AltName: Full=Pectin methylesterase 17; Short=AtPME17; Flags: Precursor;	A0A118JTX1_CYNCS, RecName: Full=Pectinesterase {ECO:0000256|RuleBase:RU000589}; EC=3.1.1.11 {ECO:0000256|RuleBase:RU000589};
TRINITY_DN102911_c5_g1	1374.17	414.76	1.73	3.02e-54	2.56e-52	up	GO:0005794,Golgi apparatus; GO:0016021,integral component of membrane; GO:0005770,late endosome; GO:0009506,plasmodesma; GO:0005774,vacuolar membrane; GO:0005773,vacuole; GO:0005375,copper ion transmembrane transporter activity; GO:0015680,intracellular copper ion transport; GO:0009737,response to abscisic acid	K14686: SLC31A1, CTR1; solute carrier family 31 (copper transporter), member 1	At5g20650	gb|PLY68692.1|	COPT5_ARATH, RecName: Full=Copper transporter 5; Short=AtCOPT5;	A0A251V4X8_HELAN, SubName: Full=Putative copper transporter 5.1 {ECO:0000313|EMBL:OTG30678.1};
TRINITY_DN96572_c5_g3	57.2394	980.216	-4.09	3.12e-54	2.64e-52	down	GO:0005634,nucleus; GO:0005886,plasma membrane; GO:0005524,ATP binding; GO:0004693,cyclin-dependent protein serine/threonine kinase activity; GO:0042742,defense response to bacterium; GO:0002229,defense response to oomycetes; GO:1900426,positive regulation of defense response to bacterium; GO:1902290,positive regulation of defense response to oomycetes; GO:0006468,protein phosphorylation; GO:2000…	--	At1g74330	ref|XP_022011319.1|	IBS1_ARATH, RecName: Full=Protein IMPAIRED IN BABA-INDUCED STERILITY 1 {ECO:0000303|PubMed:15722464}; EC=2.7.11.- {ECO:0000255|PROSITE-ProRule:PRU00159};	A0A118K5I3_CYNCS, SubName: Full=Protein kinase, ATP binding site-containing protein {ECO:0000313|EMBL:KVI09105.1};
TRINITY_DN106191_c1_g4	13303	936.31	3.83	3.67e-54	3.1e-52	up	--	--	--	--	--	--
TRINITY_DN94552_c5_g3	486.428	1630.28	-1.75	3.7e-54	3.11e-52	down	--	--	--	--	--	--
TRINITY_DN105891_c0_g3	762.441	295.264	1.37	3.72e-54	3.13e-52	up	GO:0048046,apoplast; GO:0005618,cell wall; GO:0005773,vacuole; GO:0051669,fructan beta-fructosidase activity; GO:0005975,carbohydrate metabolic process	K01193: INV, sacA; beta-fructofuranosidase [EC:3.2.1.26]	At1g55120	gb|KVH95083.1|	INV3_ARATH, RecName: Full=Beta-fructofuranosidase, insoluble isoenzyme CWINV3; AltName: Full=6-fructan exohydrolase; Short=6-FEH; EC=3.2.1.80; AltName: Full=Beta-fructofuranosidase 5; Short=AtFruct5; AltName: Full=Cell wall beta-fructosidase 3; AltName: Full=Cell wall invertase 3; Short=AtcwINV3; AltName: Full=Sucrose hydrolase 3; Flags: Precursor;	A0A103XQM1_CYNCS, SubName: Full=Concanavalin A-like lectin/glucanase superfamily {ECO:0000313|EMBL:KVH95083.1};
TRINITY_DN105408_c1_g2	887.443	115.993	2.94	6.24e-54	5.24e-52	up	GO:0005739,mitochondrion; GO:0008442,3-hydroxyisobutyrate dehydrogenase activity; GO:0051287,NAD binding; GO:0004616,phosphogluconate dehydrogenase (decarboxylating) activity; GO:0043621,protein self-association; GO:0006551,leucine metabolic process; GO:0006574,valine catabolic process; GO:0006573,valine metabolic process	--	At1g18270_1	gb|PLY93968.1|	3HIDH_ARATH, RecName: Full=Probable 3-hydroxyisobutyrate dehydrogenase, mitochondrial; Short=HIBADH; EC=1.1.1.31; Flags: Precursor;	A0A251RS64_HELAN, SubName: Full=Putative ketose-bisphosphate aldolase class-II family protein {ECO:0000313|EMBL:OTF87202.1};
TRINITY_DN107299_c3_g3	48.3698	826.406	-4.09	6.82e-54	5.72e-52	down	GO:0005886,plasma membrane; GO:0009926,auxin polar transport; GO:0009734,auxin-activated signaling pathway; GO:0007275,multicellular organism development; GO:0046620,regulation of organ growth	--	At1g29510	gb|KVI04018.1|	SAU64_ARATH, RecName: Full=Auxin-responsive protein SAUR64 {ECO:0000305}; AltName: Full=Protein SMALL AUXIN UP RNA 64 {ECO:0000303|PubMed:12036261};	A0A118K294_CYNCS, SubName: Full=Auxin responsive SAUR protein {ECO:0000313|EMBL:KVI04018.1}; Flags: Fragment;
TRINITY_DN108201_c1_g1	841.178	16458	-4.29	7.56e-54	6.33e-52	down	--	--	--	--	--	--
TRINITY_DN104276_c4_g1	2502.19	7.77439	8.34	7.92e-54	6.62e-52	up	GO:0034005,germacrene-A synthase activity; GO:0000287,magnesium ion binding; GO:0045338,farnesyl diphosphate metabolic process; GO:0016114,terpenoid biosynthetic process	K15803: GERD; (-)-germacrene D synthase [EC:4.2.3.75]	At5g23960	gb|KVH92099.1|	GASS_CICIN, RecName: Full=Germacrene A synthase short form; Short=CiGASsh; EC=4.2.3.23;	A0A103XK63_CYNCS, SubName: Full=Terpene synthase, metal-binding domain-containing protein {ECO:0000313|EMBL:KVH92099.1};
TRINITY_DN103026_c9_g3	1732.04	220.541	2.97	8.2e-54	6.84e-52	up	GO:0009507,chloroplast; GO:0008106,alcohol dehydrogenase (NADP+) activity; GO:0004033,aldo-keto reductase (NADP) activity; GO:0070401,NADP+ binding; GO:0016229,steroid dehydrogenase activity; GO:0055114,oxidation-reduction process; GO:0009409,response to cold; GO:0009651,response to salt stress; GO:0009636,response to toxic substance; GO:0009414,response to water deprivation	K00002: AKR1A1, adh; alcohol dehydrogenase (NADP+) [EC:1.1.1.2]	At2g37770	gb|KVH95585.1|	AKRC9_ARATH, RecName: Full=NADPH-dependent aldo-keto reductase, chloroplastic {ECO:0000303|PubMed:21169366}; Short=AtChlAKR {ECO:0000303|PubMed:21169366}; EC=1.1.1.- {ECO:0000269|PubMed:19616008, ECO:0000269|PubMed:21169366}; AltName: Full=Aldo-keto reductase family 4 member C9;	A0A103XRK4_CYNCS, SubName: Full=Aldo/keto reductase {ECO:0000313|EMBL:KVH95585.1};
TRINITY_DN105259_c1_g9	759.196	19.3537	5.3	9.9e-54	8.24e-52	up	GO:0004067,asparaginase activity; GO:0008798,beta-aspartyl-peptidase activity	--	At3g16150	ref|XP_021989702.1|	ASPGB_ARATH, RecName: Full=Probable isoaspartyl peptidase/L-asparaginase 2; EC=3.4.19.5; AltName: Full=L-asparagine amidohydrolase 2; Contains: RecName: Full=Isoaspartyl peptidase/L-asparaginase 2 subunit alpha; Contains: RecName: Full=Isoaspartyl peptidase/L-asparaginase 2 subunit beta; Flags: Precursor;	A0A251TMS8_HELAN, SubName: Full=Putative peptidase T2, asparaginase 2, nucleophile aminohydrolase {ECO:0000313|EMBL:OTG12438.1};
TRINITY_DN94724_c3_g1	429.469	1068.69	-1.31	1.67e-53	1.39e-51	down	--	--	--	--	--	--
TRINITY_DN100103_c6_g1	1260.75	73.5772	4.1	1.94e-53	1.61e-51	up	GO:0005759,mitochondrial matrix; GO:0004353,glutamate dehydrogenase [NAD(P)+] activity; GO:0006520,cellular amino acid metabolic process	K00261: GLUD1_2, gdhA; glutamate dehydrogenase (NAD(P)+) [EC:1.4.1.3]	At5g18170	ref|XP_021983442.1|	DHE3_SOLLC, RecName: Full=Glutamate dehydrogenase; Short=GDH; EC=1.4.1.3; AltName: Full=Legdh1;	A0A251TXX1_HELAN, RecName: Full=Glutamate dehydrogenase {ECO:0000256|PIRNR:PIRNR000185};
TRINITY_DN99401_c1_g5	132.766	700.706	-2.4	2.84e-53	2.35e-51	down	GO:0006952,defense response; GO:0009607,response to biotic stimulus	--	At1g24020	ref|XP_022001983.1|	PRU1_PRUAR, RecName: Full=Major allergen Pru ar 1; AltName: Allergen=Pru ar 1;	A0A251SY22_HELAN, SubName: Full=Putative major allergen Pyr c 1 {ECO:0000313|EMBL:OTG02471.1};
TRINITY_DN103970_c2_g2	139.289	2887.74	-4.37	3.7e-53	3.06e-51	down	--	--	--	gb|KVI02089.1|	--	A0A103Y3Z9_CYNCS, SubName: Full=Uncharacterized protein {ECO:0000313|EMBL:KVI02089.1};
TRINITY_DN97328_c3_g5	21.7361	336.405	-3.95	6.02e-53	4.97e-51	down	GO:0005618,cell wall; GO:0005768,endosome; GO:0005576,extracellular region; GO:0005794,Golgi apparatus; GO:0000139,Golgi membrane; GO:0016020,membrane; GO:0005886,plasma membrane; GO:0009506,plasmodesma; GO:0005802,trans-Golgi network; GO:0005774,vacuolar membrane; GO:0045330,aspartyl esterase activity; GO:0030599,pectinesterase activity; GO:0046910,pectinesterase inhibitor activity; GO:0042545,c…	K01051: E3.1.1.11; pectinesterase [EC:3.1.1.11]	At1g53840	gb|PLY89491.1|	PME1_ARATH, RecName: Full=Pectinesterase 1; Short=PE 1; EC=3.1.1.11; AltName: Full=Pectin methylesterase 1; Short=AtPME1; Flags: Precursor;	A0A251TP05_HELAN, RecName: Full=Pectinesterase {ECO:0000256|RuleBase:RU000589}; EC=3.1.1.11 {ECO:0000256|RuleBase:RU000589};
TRINITY_DN97866_c3_g2	957.605	237.958	2.01	7.21e-53	5.94e-51	up	GO:0005737,cytoplasm; GO:0005829,cytosol; GO:0005634,nucleus; GO:0005524,ATP binding; GO:0004672,protein kinase activity; GO:0004674,protein serine/threonine kinase activity; GO:0035556,intracellular signal transduction; GO:0046777,protein autophosphorylation; GO:0006468,protein phosphorylation	--	At5g58350	gb|PLY76012.1|	WNK4_ARATH, RecName: Full=Probable serine/threonine-protein kinase WNK4; Short=AtWNK4; EC=2.7.11.1; AltName: Full=Protein kinase with no lysine 4;	A0A251VMS0_HELAN, SubName: Full=Putative with no lysine (K) kinase 4 {ECO:0000313|EMBL:OTG36877.1};
TRINITY_DN103254_c4_g3	435.313	1171.51	-1.43	7.47e-53	6.14e-51	down	--	--	--	--	--	--
TRINITY_DN100932_c1_g2	1853.36	250.487	2.89	8.17e-53	6.72e-51	up	GO:0005737,cytoplasm; GO:0005634,nucleus; GO:0003677,DNA binding; GO:0003700,DNA binding transcription factor activity; GO:0006351,transcription, DNA-templated	--	At5g18270	gb|KVH90701.1|	NAC87_ARATH, RecName: Full=NAC domain-containing protein 87 {ECO:0000303|PubMed:15029955}; Short=ANAC087 {ECO:0000303|PubMed:15029955};	A0A124SBI1_CYNCS, SubName: Full=No apical meristem (NAM) protein {ECO:0000313|EMBL:KVH90701.1};
TRINITY_DN94643_c10_g2	2438.85	777.054	1.65	8.52e-53	6.99e-51	up	GO:0005737,cytoplasm; GO:0012505,endomembrane system; GO:0016021,integral component of membrane; GO:0005634,nucleus	--	At3g20510	gb|KVI10322.1|	FAX6_ARATH, RecName: Full=Protein FATTY ACID EXPORT 6 {ECO:0000303|PubMed:25646734}; Short=At-FAX6 {ECO:0000303|PubMed:25646734};	A0A124SHR2_CYNCS, SubName: Full=Uncharacterized protein family UPF0136, Transmembrane {ECO:0000313|EMBL:KVI10322.1};
TRINITY_DN106875_c1_g1	486.503	108.292	2.17	9.34e-53	7.65e-51	up	GO:0020037,heme binding; GO:0005506,iron ion binding; GO:0004497,monooxygenase activity; GO:0016705,oxidoreductase activity, acting on paired donors, with incorporation or reduction of molecular oxygen	--	At2g45550	gb|KVI02662.1|	C76B1_HELTU, RecName: Full=7-ethoxycoumarin O-deethylase; Short=ECOD; EC=1.14.-.-; AltName: Full=Cytochrome P450 76B1; AltName: Full=Phenylurea dealkylase;	A0A103Y530_CYNCS, SubName: Full=Cytochrome P450 {ECO:0000313|EMBL:KVI02662.1};
TRINITY_DN107664_c0_g1	363.628	57.8802	2.65	9.52e-53	7.79e-51	up	--	K07151: STT3; dolichyl-diphosphooligosaccharide---protein glycosyltransferase [EC:2.4.99.18]	At1g33813	gb|OTG02985.1|	--	A0A251SVU7_HELAN, SubName: Full=Putative zinc finger, CCHC-type {ECO:0000313|EMBL:OTG02985.1};
TRINITY_DN92773_c0_g2	144.392	780.436	-2.43	1.15e-52	9.37e-51	down	--	--	--	gb|PLY86624.1|	--	A0A103XZF8_CYNCS, SubName: Full=Uncharacterized protein {ECO:0000313|EMBL:KVH99726.1};
TRINITY_DN101336_c4_g3	342.845	56.727	2.59	1.17e-52	9.55e-51	up	GO:0005737,cytoplasm; GO:0005524,ATP binding; GO:0004674,protein serine/threonine kinase activity; GO:0009555,pollen development	K04733: IRAK4; interleukin-1 receptor-associated kinase 4 [EC:2.7.11.1]	At4g00330	ref|XP_022017097.1|	CRCK2_ARATH, RecName: Full=Calmodulin-binding receptor-like cytoplasmic kinase 2; EC=2.7.11.1;	A0A251S199_HELAN, SubName: Full=Putative calmodulin-binding receptor-like cytoplasmic kinase 2 {ECO:0000313|EMBL:OTF92477.1};
TRINITY_DN56787_c0_g1	40.227	423.063	-3.39	1.25e-52	1.02e-50	down	--	--	At4g13450	gb|KVH94939.1|	--	A0A103XQC0_CYNCS, SubName: Full=Rossmann-like alpha/beta/alpha sandwich fold {ECO:0000313|EMBL:KVH94939.1};
TRINITY_DN94625_c6_g1	29.6536	261.54	-3.15	1.81e-52	1.47e-50	down	GO:0005618,cell wall; GO:0005615,extracellular space; GO:0004031,aldehyde oxidase activity; GO:0102797,geranial:oxygen oxidoreductase activity; GO:0102798,heptaldehyde:oxygen oxidoreductase activity; GO:0050832,defense response to fungus	--	At3g53950	gb|KVH94892.1|	GLOX_VITPS, RecName: Full=Aldehyde oxidase GLOX {ECO:0000305}; EC=1.2.3.1 {ECO:0000305}; AltName: Full=Glyoxal oxidase {ECO:0000303|Ref.1}; Short=VpGLOX {ECO:0000303|PubMed:20512385}; Flags: Precursor;	A0A103XQ69_CYNCS, SubName: Full=Uncharacterized protein {ECO:0000313|EMBL:KVH94892.1};
TRINITY_DN103787_c0_g5	174.868	622.168	-1.83	2.01e-52	1.63e-50	down	GO:0016021,integral component of membrane; GO:0009705,plant-type vacuole membrane; GO:0005774,vacuolar membrane; GO:0005773,vacuole; GO:0015369,calcium:proton antiporter activity; GO:0006874,cellular calcium ion homeostasis; GO:0030026,cellular manganese ion homeostasis; GO:0006882,cellular zinc ion homeostasis; GO:0055062,phosphate ion homeostasis; GO:0006793,phosphorus metabolic process; GO:005…	--	At2g38170	gb|PLY77046.1|	CAX3_ARATH, RecName: Full=Vacuolar cation/proton exchanger 3; AltName: Full=Ca(2+)/H(+) antiporter CAX3; AltName: Full=Ca(2+)/H(+) exchanger 3; AltName: Full=Protein CATION EXCHANGER 3;	A0A124SI21_CYNCS, SubName: Full=Calcium/proton exchanger {ECO:0000313|EMBL:KVI11358.1};
TRINITY_DN94175_c0_g3	965.386	325.852	1.57	3.48e-52	2.81e-50	up	GO:0005634,nucleus; GO:0003677,DNA binding; GO:0003700,DNA binding transcription factor activity; GO:0009788,negative regulation of abscisic acid-activated signaling pathway; GO:0009611,response to wounding; GO:0006351,transcription, DNA-templated	--	At1g01720	gb|KVH92730.1|	NAC2_ARATH, RecName: Full=NAC domain-containing protein 2; Short=ANAC002;	A0A103XLA9_CYNCS, SubName: Full=No apical meristem (NAM) protein {ECO:0000313|EMBL:KVH92730.1};
TRINITY_DN107840_c9_g1	525.038	1320.58	-1.33	5.84e-52	4.7e-50	down	GO:0016621,cinnamoyl-CoA reductase activity; GO:0050662,coenzyme binding; GO:0007623,circadian rhythm; GO:0006952,defense response; GO:0042754,negative regulation of circadian rhythm; GO:0009699,phenylpropanoid biosynthetic process; GO:0009409,response to cold	K09753: CCR; cinnamoyl-CoA reductase [EC:1.2.1.44]	At2g33590	gb|PLY70708.1|	CCR2_ARATH, RecName: Full=Cinnamoyl-CoA reductase 2; Short=AtCCR2; EC=1.2.1.44;	A0A124SEZ3_CYNCS, SubName: Full=NAD(P)-binding domain-containing protein {ECO:0000313|EMBL:KVI01606.1};
TRINITY_DN106815_c2_g2	3655.64	1700.2	1.1	6.54e-52	5.25e-50	up	--	--	At5g64190	ref|XP_022006361.1|	--	A0A251SL88_HELAN, SubName: Full=Uncharacterized protein {ECO:0000313|EMBL:OTF99634.1};
TRINITY_DN107806_c0_g2	104.133	705.788	-2.76	6.93e-52	5.56e-50	down	--	--	--	--	--	--
TRINITY_DN103624_c2_g1	2560.96	151.653	4.08	7.5e-52	6.01e-50	up	--	--	At3g20340	gb|PLY85177.1|	--	F6HEJ8_VITVI, SubName: Full=Uncharacterized protein {ECO:0000313|EMBL:CCB50657.1};
TRINITY_DN99174_c2_g2	485.694	28.746	4.08	8.72e-52	6.97e-50	up	GO:0005886,plasma membrane	--	At1g76070	gb|KVI05187.1|	Y1607_ARATH, RecName: Full=Uncharacterized protein At1g76070;	A0A103Y9V5_CYNCS, SubName: Full=Uncharacterized protein {ECO:0000313|EMBL:KVI05187.1};
TRINITY_DN106304_c3_g9	2.12497	890.687	-8.64	1.18e-51	9.4e-50	down	GO:0009507,chloroplast; GO:0016758,transferase activity, transferring hexosyl groups; GO:0008152,metabolic process	K21371: UGT75L6, UGTCs2; crocetin glucosyltransferase [EC:2.4.1.271]	At4g14090	gb|KVI08240.1|	UGT1_GARJA, RecName: Full=Crocetin glucosyltransferase, chloroplastic; EC=2.4.1.271; AltName: Full=UDP-glucose glucosyltransferase 1; Short=GjUGT1; AltName: Full=UDP-glycosyltransferase 75L6; Flags: Precursor;	A0A103YFP0_CYNCS, RecName: Full=Glycosyltransferase {ECO:0000256|RuleBase:RU362057}; EC=2.4.1.- {ECO:0000256|RuleBase:RU362057};
TRINITY_DN104046_c3_g4	115.826	513.037	-2.15	1.19e-51	9.45e-50	down	GO:0009507,chloroplast; GO:0016020,membrane; GO:0008289,lipid binding; GO:0007049,cell cycle; GO:0051301,cell division	--	At1g72150	ref|XP_022000986.1|	PATL5_ARATH, RecName: Full=Patellin-5;	A0A251SSH5_HELAN, SubName: Full=Putative PATELLIN 1 {ECO:0000313|EMBL:OTG01462.1};
TRINITY_DN101418_c2_g4	3461.3	1690.43	1.03	1.2e-51	9.55e-50	up	GO:0005737,cytoplasm; GO:0005634,nucleus; GO:0019005,SCF ubiquitin ligase complex; GO:0031625,ubiquitin protein ligase binding; GO:0043161,proteasome-mediated ubiquitin-dependent protein catabolic process; GO:0042787,NA; GO:0030162,regulation of proteolysis	K06027: NSF, SEC18; vesicle-fusing ATPase [EC:3.6.4.6]	At2g02870	gb|KVH97750.1|	SKI11_ARATH, RecName: Full=F-box/kelch-repeat protein SKIP11; AltName: Full=SKP1-interacting partner 11;	A0A118JYW7_CYNCS, SubName: Full=Galactose oxidase, beta-propeller {ECO:0000313|EMBL:KVH97750.1};
TRINITY_DN101135_c8_g2	400.924	27.1274	3.88	1.45e-51	1.15e-49	up	--	--	At1g27100	gb|KVI02525.1|	--	A0A103Y4S4_CYNCS, SubName: Full=Actin cross-linking {ECO:0000313|EMBL:KVI02525.1};
TRINITY_DN105092_c2_g1	27013.9	2147.54	3.65	1.69e-51	1.34e-49	up	--	--	--	--	--	--
TRINITY_DN105135_c1_g1	753.017	5.64391	7.05	1.95e-51	1.55e-49	up	GO:0022625,cytosolic large ribosomal subunit; GO:0003723,RNA binding; GO:0003735,structural constituent of ribosome; GO:0000027,ribosomal large subunit assembly; GO:0006412,translation	K02925: RP-L3e, RPL3; large subunit ribosomal protein L3e	SPAC17A5.03	gb|POE90624.1|	RL3_ORYSJ, RecName: Full=60S ribosomal protein L3;	A0A1D1XCM9_9ARAE, SubName: Full=60S ribosomal protein L3 {ECO:0000313|EMBL:JAT40180.1};
TRINITY_DN102936_c2_g2	65.613	644.956	-3.3	2.46e-51	1.94e-49	down	--	--	--	--	--	--
TRINITY_DN76466_c0_g2	8.8049	651.108	-6.22	2.76e-51	2.18e-49	down	--	--	--	--	--	--
TRINITY_DN97040_c4_g3	5116.92	597.517	3.1	3.03e-51	2.39e-49	up	GO:0005737,cytoplasm; GO:0005634,nucleus; GO:0009734,auxin-activated signaling pathway; GO:0007275,multicellular organism development; GO:0040008,regulation of growth; GO:1900140,regulation of seedling development	K14488: SAUR; SAUR family protein	At2g46690	gb|PLY79344.1|	SAU32_ARATH, RecName: Full=Auxin-responsive protein SAUR32 {ECO:0000305}; AltName: Full=Protein ABOLISHED APICAL HOOK MAINTENANCE 1 {ECO:0000303|Ref.6}; AltName: Full=Protein SMALL AUXIN UP RNA 32 {ECO:0000303|PubMed:12036261};	A0A103XBJ6_CYNCS, SubName: Full=Uncharacterized protein {ECO:0000313|EMBL:KVH87677.1};
TRINITY_DN99806_c2_g8	61.4663	388.408	-2.66	3.15e-51	2.48e-49	down	--	K13667: RUMI, KTELC1; protein glucosyltransferase [EC:2.4.1.-]	At5g23850	gb|KVH89114.1|	--	A0A103XEE5_CYNCS, SubName: Full=Lipopolysaccharide-modifying protein {ECO:0000313|EMBL:KVH89114.1};
TRINITY_DN96444_c1_g2	88184.5	0	18.86	3.2e-51	2.52e-49	up	--	--	--	--	--	--
TRINITY_DN97903_c1_g1	172.557	1445.44	-3.07	3.48e-51	2.74e-49	down	--	--	--	--	--	--
TRINITY_DN98589_c4_g3	658.309	2202.28	-1.74	3.67e-51	2.88e-49	down	GO:0005737,cytoplasm; GO:0005634,nucleus; GO:0004871,signal transducer activity; GO:0009638,phototropism; GO:0016567,protein ubiquitination	K03063: PSMC4, RPT3; 26S proteasome regulatory subunit T3	At2g30510	gb|PLY77700.1|	RPT2_ARATH, RecName: Full=Root phototropism protein 2; AltName: Full=BTB/POZ domain-containing protein RPT2;	A0A251U6W5_HELAN, SubName: Full=Putative phototropic-responsive NPH3 family protein {ECO:0000313|EMBL:OTG19088.1};
TRINITY_DN108262_c4_g3	3053.19	601.748	2.34	4.78e-51	3.74e-49	up	--	--	At1g42690	ref|XP_022039988.1|	--	A0A251UC73_HELAN, SubName: Full=Putative harbinger transposase-derived protein {ECO:0000313|EMBL:OTG20372.1};
TRINITY_DN100395_c3_g1	1006.89	100.756	3.32	4.78e-51	3.74e-49	up	--	--	At5g40690	ref|XP_021982382.1|	--	A0A251TWQ6_HELAN, SubName: Full=Putative EF-Hand 1, calcium-binding site {ECO:0000313|EMBL:OTG15016.1};
TRINITY_DN98482_c3_g1	1381.07	94.8777	3.86	5.2e-51	4.05e-49	up	--	--	--	--	--	--
TRINITY_DN94787_c1_g2	137.837	465.661	-1.76	5.54e-51	4.31e-49	down	GO:0036513,Derlin-1 retrotranslocation complex; GO:0005783,endoplasmic reticulum; GO:0016021,integral component of membrane; GO:0016020,membrane; GO:0046872,metal ion binding; GO:1904264,NA; GO:0044390,ubiquitin-like protein conjugating enzyme binding; GO:0004842,ubiquitin-protein transferase activity; GO:0071712,ER-associated misfolded protein catabolic process; GO:0032527,protein exit from endo…	K10666: RNF5; E3 ubiquitin-protein ligase RNF5 [EC:2.3.2.27]	At4g03510	gb|KVI02234.1|	RMA1_ARATH, RecName: Full=E3 ubiquitin-protein ligase RMA1; EC=2.3.2.27; AltName: Full=Protein RING membrane-anchor 1; AltName: Full=RING-type E3 ubiquitin transferase RMA1 {ECO:0000305};	A0A103Y488_CYNCS, SubName: Full=Uncharacterized protein {ECO:0000313|EMBL:KVI02234.1};
TRINITY_DN100743_c2_g1	756.335	95.5402	2.98	5.83e-51	4.53e-49	up	GO:0009507,chloroplast; GO:0005737,cytoplasm; GO:0010279,indole-3-acetic acid amido synthetase activity; GO:0010252,auxin homeostasis; GO:0009734,auxin-activated signaling pathway; GO:0009733,response to auxin; GO:0009826,unidimensional cell growth	K14487: GH3; auxin responsive GH3 gene family	At5g54510	ref|XP_022039465.1|	GH36_ARATH, RecName: Full=Indole-3-acetic acid-amido synthetase GH3.6; EC=6.3.2.-; AltName: Full=Auxin-responsive GH3-like protein 6; Short=AtGH3-6; AltName: Full=Protein DWARF IN LIGHT 1; Short=DFL-1;	A0A251UTY9_HELAN, SubName: Full=Putative GH3 family {ECO:0000313|EMBL:OTG26493.1};
TRINITY_DN102943_c4_g1	1197.59	355.495	1.75	6.8e-51	5.27e-49	up	GO:0004364,glutathione transferase activity; GO:0006952,defense response	K00799: GST, gst; glutathione S-transferase [EC:2.5.1.18]	At2g29420	gb|PLY84653.1|	GST23_MAIZE, RecName: Full=Glutathione transferase GST 23; EC=2.5.1.18; AltName: Full=Glutathione transferase GST 36;	A0A251VJ54_HELAN, SubName: Full=Putative glutathione S-transferase tau 4 {ECO:0000313|EMBL:OTG35173.1};
TRINITY_DN106644_c2_g1	1433.24	37.2537	5.27	8.22e-51	6.37e-49	up	GO:0012511,monolayer-surrounded lipid storage body; GO:0020037,heme binding; GO:0046872,metal ion binding; GO:0016702,oxidoreductase activity, acting on single donors with incorporation of molecular oxygen, incorporation of two atoms of oxygen; GO:0004601,peroxidase activity; GO:1902609,(R)-2-hydroxy-alpha-linolenic acid biosynthetic process; GO:0008219,cell death; GO:0071732,cellular response to…	K10529: DOX1; alpha-dioxygenase [EC:1.-.-.-]	At3g01420	gb|KVI09082.1|	DOX1_ARATH, RecName: Full=Alpha-dioxygenase 1; Short=Alpha DOX1; EC=1.14.99.-; AltName: Full=Fatty acid dioxygenase AlphaDOX1; AltName: Full=Pathogen-induced oxygenase; AltName: Full=Plant alpha dioxygenase 1; Flags: Precursor;	A0A103YHB5_CYNCS, SubName: Full=Heme peroxidase {ECO:0000313|EMBL:KVI09082.1};
TRINITY_DN98657_c3_g3	600.974	196.242	1.61	8.34e-51	6.45e-49	up	GO:0005634,nucleus; GO:0003677,DNA binding; GO:0003700,DNA binding transcription factor activity; GO:0009734,auxin-activated signaling pathway; GO:0048527,lateral root development; GO:0010072,primary shoot apical meristem specification; GO:0006351,transcription, DNA-templated	--	At1g56010	gb|KVH99236.1|	NAC22_ARATH, RecName: Full=NAC domain-containing protein 21/22; Short=ANAC021/ANAC022;	A0A118JZ47_CYNCS, SubName: Full=No apical meristem (NAM) protein {ECO:0000313|EMBL:KVH99236.1};
TRINITY_DN96001_c7_g3	10.3438	269.73	-4.71	1.14e-50	8.77e-49	down	GO:0019901,protein kinase binding; GO:0007049,cell cycle; GO:0051301,cell division; GO:0000079,regulation of cyclin-dependent protein serine/threonine kinase activity	K01255: CARP, pepA; leucyl aminopeptidase [EC:3.4.11.1]	At2g44740	gb|KVI00544.1|	CCU41_ARATH, RecName: Full=Cyclin-U4-1; Short=CycU4;1; AltName: Full=Cyclin-P4.1; Short=CycP4;1;	A0A103Y107_CYNCS, SubName: Full=Cyclin-like protein {ECO:0000313|EMBL:KVI00544.1};
TRINITY_DN101201_c1_g1	4290.23	1151.45	1.9	1.17e-50	9.01e-49	up	GO:0008824,cyanate hydratase activity; GO:0043565,sequence-specific DNA binding; GO:0009439,cyanate metabolic process	K01725: cynS; cyanate lyase [EC:4.2.1.104]	At3g23490	ref|XP_022035231.1|	CYNS_MEDTR, RecName: Full=Cyanate hydratase {ECO:0000255|HAMAP-Rule:MF_03139}; Short=Cyanase {ECO:0000255|HAMAP-Rule:MF_03139}; EC=4.2.1.104 {ECO:0000255|HAMAP-Rule:MF_03139}; AltName: Full=Cyanate hydrolase {ECO:0000255|HAMAP-Rule:MF_03139}; AltName: Full=Cyanate lyase {ECO:0000255|HAMAP-Rule:MF_03139};	A0A251UZM3_HELAN, RecName: Full=Cyanate hydratase {ECO:0000256|HAMAP-Rule:MF_03139}; Short=Cyanase {ECO:0000256|HAMAP-Rule:MF_03139}; EC=4.2.1.104 {ECO:0000256|HAMAP-Rule:MF_03139}; AltName: Full=Cyanate hydrolase {ECO:0000256|HAMAP-Rule:MF_03139}; AltName: Full=Cyanate lyase {ECO:0000256|HAMAP-Rule:MF_03139};
TRINITY_DN105794_c1_g6	1832.04	775.189	1.24	1.34e-50	1.03e-48	up	--	--	--	--	--	--
TRINITY_DN108065_c0_g3	737.519	47.3605	3.97	1.39e-50	1.07e-48	up	GO:0071944,cell periphery; GO:0005618,cell wall; GO:0005576,extracellular region; GO:0045330,aspartyl esterase activity; GO:0030599,pectinesterase activity; GO:0046910,pectinesterase inhibitor activity; GO:0042545,cell wall modification; GO:0045490,pectin catabolic process	K01051: E3.1.1.11; pectinesterase [EC:3.1.1.11]	At3g14310	gb|PLY87160.1|	PMEU1_SOLLC, RecName: Full=Pectinesterase/pectinesterase inhibitor U1; Includes: RecName: Full=Pectinesterase inhibitor U1; AltName: Full=Pectin methylesterase inhibitor U1; Includes: RecName: Full=Pectinesterase U1; Short=PE U1; EC=3.1.1.11; AltName: Full=Pectin methylesterase U1; Flags: Precursor;	A0A251SZG6_HELAN, RecName: Full=Pectinesterase {ECO:0000256|RuleBase:RU000589}; EC=3.1.1.11 {ECO:0000256|RuleBase:RU000589};
TRINITY_DN104637_c1_g1	578.114	111.723	2.37	1.47e-50	1.13e-48	up	GO:0016021,integral component of membrane; GO:0005886,plasma membrane; GO:0005524,ATP binding; GO:0030247,polysaccharide binding; GO:0004674,protein serine/threonine kinase activity; GO:0007166,cell surface receptor signaling pathway; GO:0071215,cellular response to abscisic acid stimulus; GO:0042631,cellular response to water deprivation; GO:0048573,photoperiodism, flowering	K04733: IRAK4; interleukin-1 receptor-associated kinase 4 [EC:2.7.11.1]	At1g18390	gb|PLY72015.1|	LRL12_ARATH, RecName: Full=LEAF RUST 10 DISEASE-RESISTANCE LOCUS RECEPTOR-LIKE PROTEIN KINASE-like 1.2 {ECO:0000303|PubMed:12805585}; EC=2.7.11.1; AltName: Full=Probable receptor-like serine/threonine-protein kinase LRK10L-1.2 {ECO:0000305}; Flags: Precursor;	A0A251RSH9_HELAN, SubName: Full=Uncharacterized protein {ECO:0000313|EMBL:OTF87312.1};
TRINITY_DN105031_c4_g2	189.18	547.652	-1.53	1.59e-50	1.22e-48	down	GO:0005829,cytosol; GO:0005634,nucleus; GO:0005524,ATP binding; GO:0016301,kinase activity; GO:0070300,phosphatidic acid binding; GO:0004672,protein kinase activity; GO:0004674,protein serine/threonine kinase activity; GO:0035556,intracellular signal transduction; GO:0048527,lateral root development; GO:0006970,response to osmotic stress; GO:0009651,response to salt stress	K14498: SNRK2; serine/threonine-protein kinase SRK2 [EC:2.7.11.1]	At1g60940	gb|KVI11033.1|	SRK2B_ARATH, RecName: Full=Serine/threonine-protein kinase SRK2B; EC=2.7.11.1; AltName: Full=OST1-kinase-like 6; AltName: Full=SNF1-related kinase 2.10; Short=SnRK2.10;	A0A103YL21_CYNCS, SubName: Full=Protein kinase, ATP binding site-containing protein {ECO:0000313|EMBL:KVI11033.1};
TRINITY_DN104407_c3_g3	580.227	62.9954	3.21	1.68e-50	1.29e-48	up	GO:0016021,integral component of membrane; GO:0005886,plasma membrane; GO:0015171,amino acid transmembrane transporter activity; GO:0015293,symporter activity; GO:0043090,amino acid import; GO:0080167,response to karrikin	K15015: SLC32A, VGAT; solute carrier family 32 (vesicular inhibitory amino acid transporter)	At5g40780	gb|KVI02538.1|	LHT1_ARATH, RecName: Full=Lysine histidine transporter 1;	A0A124SF94_CYNCS, SubName: Full=Amino acid transporter, transmembrane {ECO:0000313|EMBL:KVI02538.1};
TRINITY_DN98980_c1_g2	1.96844	921.994	-8.9	2e-50	1.53e-48	down	GO:0050422,strictosidine beta-glucosidase activity; GO:0009821,alkaloid biosynthetic process; GO:0005975,carbohydrate metabolic process	K01188: E3.2.1.21; beta-glucosidase [EC:3.2.1.21]	At5g25980	gb|KVH91147.1|	SG1_RAUSE, RecName: Full=Strictosidine-O-beta-D-glucosidase; EC=3.2.1.105;	A0A118JTL8_CYNCS, SubName: Full=Uncharacterized protein {ECO:0000313|EMBL:KVH91147.1};
TRINITY_DN107538_c0_g3	26250	7668.05	1.78	3.25e-50	2.48e-48	up	--	--	--	--	--	--
TRINITY_DN163483_c0_g1	2146.35	169.822	3.66	3.37e-50	2.57e-48	up	--	--	--	--	--	--
TRINITY_DN99970_c2_g2	969.206	218.63	2.15	3.57e-50	2.72e-48	up	GO:0009570,chloroplast stroma; GO:0009534,chloroplast thylakoid; GO:0016165,linoleate 13S-lipoxygenase activity; GO:0046872,metal ion binding; GO:0031408,oxylipin biosynthetic process	K00454: LOX2S; lipoxygenase [EC:1.13.11.12]	At1g72520	gb|PLY78612.1|	LOX31_SOLTU, RecName: Full=Linoleate 13S-lipoxygenase 3-1, chloroplastic; EC=1.13.11.12; Flags: Precursor;	A0A251U0R8_HELAN, RecName: Full=Lipoxygenase {ECO:0000256|RuleBase:RU003975}; EC=1.13.11.- {ECO:0000256|RuleBase:RU003975};
TRINITY_DN100942_c0_g1	2765.5	1106.35	1.32	8.05e-50	6.11e-48	up	GO:0005789,endoplasmic reticulum membrane; GO:0005794,Golgi apparatus; GO:0000139,Golgi membrane; GO:0016021,integral component of membrane; GO:0031902,late endosome membrane; GO:0015914,phospholipid transport	--	At3g12740	gb|PLY71345.1|	ALIS1_ARATH, RecName: Full=ALA-interacting subunit 1; Short=AtALIS1; AltName: Full=ALA3 beta-subunit 1;	A0A251T9Q7_HELAN, SubName: Full=Putative CDC50/LEM3 family {ECO:0000313|EMBL:OTG06681.1};
TRINITY_DN98797_c1_g2	35.4644	460.492	-3.7	1.24e-49	9.36e-48	down	GO:0042973,glucan endo-1,3-beta-D-glucosidase activity; GO:0005975,carbohydrate metabolic process; GO:0006952,defense response	K19891: GN1_2_3; glucan endo-1,3-beta-glucosidase 1/2/3 [EC:3.2.1.39]	At3g55430	ref|XP_022006282.1|	E13B_WHEAT, RecName: Full=Glucan endo-1,3-beta-glucosidase; EC=3.2.1.39; AltName: Full=(1->3)-beta-glucan endohydrolase; Short=(1->3)-beta-glucanase; AltName: Full=Beta-1,3-endoglucanase; Flags: Precursor;	A0A251SLZ3_HELAN, SubName: Full=Putative glycoside hydrolase family 17 {ECO:0000313|EMBL:OTF99561.1};
TRINITY_DN107459_c3_g1	8291.87	2345.1	1.82	1.37e-49	1.03e-47	up	--	--	--	gb|OTF99803.1|	--	A0A251SM57_HELAN, SubName: Full=Uncharacterized protein {ECO:0000313|EMBL:OTF99803.1};
TRINITY_DN100960_c2_g2	3518.14	1292.73	1.44	1.39e-49	1.05e-47	up	GO:0005634,nucleus; GO:0003700,DNA binding transcription factor activity; GO:0045735,nutrient reservoir activity; GO:0046982,protein heterodimerization activity; GO:0043565,sequence-specific DNA binding; GO:0009267,cellular response to starvation; GO:0006971,hypotonic response; GO:2000693,positive regulation of seed maturation; GO:0045893,positive regulation of transcription, DNA-templated; GO:00…	--	At3g62420	gb|KVI12465.1|	BZP53_ARATH, RecName: Full=bZIP transcription factor 53 {ECO:0000303|PubMed:11906833}; Short=AtbZIP53 {ECO:0000303|PubMed:11906833};	A0A118K7M8_CYNCS, SubName: Full=Basic-leucine zipper domain-containing protein {ECO:0000313|EMBL:KVI12465.1};
TRINITY_DN105601_c2_g1	603.051	106.444	2.5	1.45e-49	1.09e-47	up	GO:0005887,integral component of plasma membrane; GO:0043231,intracellular membrane-bounded organelle; GO:0005524,ATP binding; GO:0005388,calcium-transporting ATPase activity; GO:0005516,calmodulin binding; GO:0046872,metal ion binding	--	At3g63380	gb|KVI11614.1|	ACA12_ARATH, RecName: Full=Calcium-transporting ATPase 12, plasma membrane-type; EC=3.6.3.8; AltName: Full=Ca(2+)-ATPase isoform 12;	A0A103YM31_CYNCS, RecName: Full=Calcium-transporting ATPase {ECO:0000256|RuleBase:RU361146}; EC=3.6.3.8 {ECO:0000256|RuleBase:RU361146};
TRINITY_DN100347_c2_g1	487.191	104.722	2.22	1.81e-49	1.36e-47	up	--	--	At2g10780	gb|OTG05221.1|	--	A0A251T5N2_HELAN, SubName: Full=Putative reverse transcriptase domain-containing protein {ECO:0000313|EMBL:OTG05221.1};
TRINITY_DN107448_c3_g1	2190.95	9719.38	-2.15	1.92e-49	1.44e-47	down	--	--	--	gb|PLY78090.1|	--	A0A251VGN2_HELAN, SubName: Full=Putative DNA-binding domain-containing protein {ECO:0000313|EMBL:OTG34333.1};
TRINITY_DN106274_c9_g5	1653.34	16.2372	6.66	2.02e-49	1.52e-47	up	GO:0005737,cytoplasm; GO:0004364,glutathione transferase activity; GO:0006749,glutathione metabolic process; GO:0009407,toxin catabolic process	K00799: GST, gst; glutathione S-transferase [EC:2.5.1.18]	At1g78340	gb|KVI11422.1|	GSTX3_SOYBN, RecName: Full=Glutathione S-transferase 3; EC=2.5.1.18;	A0A103YLV8_CYNCS, SubName: Full=Glutathione S-transferase/chloride channel, C-terminal {ECO:0000313|EMBL:KVI11422.1}; Flags: Fragment;
TRINITY_DN100197_c7_g3	97.6504	528.314	-2.43	2.78e-49	2.08e-47	down	--	--	At2g01710	gb|PLY72553.1|	--	A0A251SCK7_HELAN, SubName: Full=Putative chaperone DnaJ-domain superfamily protein {ECO:0000313|EMBL:OTF96596.1};
TRINITY_DN106541_c0_g2	3728.54	380.194	3.29	3.12e-49	2.33e-47	up	GO:0009570,chloroplast stroma; GO:0009534,chloroplast thylakoid; GO:0016165,linoleate 13S-lipoxygenase activity; GO:0046872,metal ion binding; GO:0010597,green leaf volatile biosynthetic process; GO:0031408,oxylipin biosynthetic process	K00454: LOX2S; lipoxygenase [EC:1.13.11.12]	At3g45140	gb|KVH90897.1|	LOX21_SOLTU, RecName: Full=Linoleate 13S-lipoxygenase 2-1, chloroplastic; EC=1.13.11.12; AltName: Full=Lipoxygenase 2-1; Flags: Precursor;	A0A118JUA2_CYNCS, RecName: Full=Lipoxygenase {ECO:0000256|RuleBase:RU003975}; EC=1.13.11.- {ECO:0000256|RuleBase:RU003975}; Flags: Fragment;
TRINITY_DN94091_c4_g4	120.235	792.01	-2.72	3.66e-49	2.73e-47	down	GO:0005634,nucleus; GO:0003700,DNA binding transcription factor activity; GO:0043565,sequence-specific DNA binding; GO:0048826,cotyledon morphogenesis; GO:0009965,leaf morphogenesis; GO:0080022,primary root development; GO:0009744,response to sucrose; GO:0006351,transcription, DNA-templated	--	At1g69780	gb|KVI02441.1|	ATB13_ARATH, RecName: Full=Homeobox-leucine zipper protein ATHB-13; AltName: Full=HD-ZIP protein ATHB-13; AltName: Full=Homeodomain transcription factor ATHB-13;	A0A103Y4M2_CYNCS, SubName: Full=Helix-turn-helix motif-containing protein {ECO:0000313|EMBL:KVI02441.1};
TRINITY_DN106078_c6_g5	4085.09	858.731	2.25	5.25e-49	3.91e-47	up	GO:0043231,intracellular membrane-bounded organelle; GO:0080043,quercetin 3-O-glucosyltransferase activity; GO:0080044,quercetin 7-O-glucosyltransferase activity; GO:0008152,metabolic process	K13493: UGT76C1_2; cytokinin-N-glucosyltransferase [EC:2.4.1.-]	At3g55700	gb|OTF99620.1|	U76F1_ARATH, RecName: Full=UDP-glycosyltransferase 76F1; EC=2.4.1.-;	A0A251SQ17_HELAN, SubName: Full=Putative UDP-glucuronosyl/UDP-glucosyltransferase {ECO:0000313|EMBL:OTF99620.1};
TRINITY_DN101790_c1_g1	1977.03	670.286	1.56	5.49e-49	4.08e-47	up	GO:0005524,ATP binding; GO:0008865,fructokinase activity; GO:0019252,starch biosynthetic process	K00847: E2.7.1.4, scrK; fructokinase [EC:2.7.1.4]	At1g06030	gb|KVI00467.1|	SCRK2_SOLLC, RecName: Full=Fructokinase-2; EC=2.7.1.4;	A0A124SEL6_CYNCS, SubName: Full=Carbohydrate kinase PfkB {ECO:0000313|EMBL:KVI00467.1};
TRINITY_DN104900_c1_g2	187.132	953.633	-2.35	5.53e-49	4.11e-47	down	GO:0005737,cytoplasm; GO:0005829,cytosol; GO:0005634,nucleus; GO:0005524,ATP binding; GO:0016301,kinase activity; GO:0004672,protein kinase activity; GO:0004674,protein serine/threonine kinase activity; GO:0009738,abscisic acid-activated signaling pathway; GO:0035556,intracellular signal transduction; GO:0010029,regulation of seed germination; GO:0009737,response to abscisic acid; GO:0009739,resp…	K14498: SNRK2; serine/threonine-protein kinase SRK2 [EC:2.7.11.1]	At5g66880	gb|PLY97150.1|	SRK2I_ARATH, RecName: Full=Serine/threonine-protein kinase SRK2I; EC=2.7.11.1; AltName: Full=OST1-kinase-like 2; AltName: Full=Protein ATHPROKIN B; AltName: Full=SNF1-related kinase 2.3; Short=SnRK2.3;	A0A251SEN3_HELAN, SubName: Full=Putative SNF1-related protein kinase 2.2 {ECO:0000313|EMBL:OTF97088.1};
TRINITY_DN95312_c1_g1	318.484	57.0293	2.48	6.9e-49	5.12e-47	up	GO:0016021,integral component of membrane; GO:0005886,plasma membrane; GO:0005524,ATP binding; GO:0004674,protein serine/threonine kinase activity; GO:0042742,defense response to bacterium; GO:0006468,protein phosphorylation	K04733: IRAK4; interleukin-1 receptor-associated kinase 4 [EC:2.7.11.1]	At4g23180	gb|KVI04458.1|	CRK10_ARATH, RecName: Full=Cysteine-rich receptor-like protein kinase 10; Short=Cysteine-rich RLK10; EC=2.7.11.-; AltName: Full=Receptor-like protein kinase 4; Flags: Precursor;	A0A118K2J2_CYNCS, SubName: Full=Protein kinase, catalytic domain-containing protein {ECO:0000313|EMBL:KVI04458.1};
TRINITY_DN107314_c0_g2	30057.7	8874.04	1.76	8.46e-49	6.27e-47	up	--	--	--	--	--	--
TRINITY_DN102202_c0_g1	13.5037	283.337	-4.39	1.09e-48	8.04e-47	down	GO:0009535,chloroplast thylakoid membrane; GO:0009579,thylakoid; GO:0045549,9-cis-epoxycarotenoid dioxygenase activity; GO:0046872,metal ion binding; GO:0009688,abscisic acid biosynthetic process; GO:0009414,response to water deprivation; GO:0010162,seed dormancy process	K09840: NCED; 9-cis-epoxycarotenoid dioxygenase [EC:1.13.11.51]	At1g30100	gb|KVH93189.1|	NCED5_ARATH, RecName: Full=Probable 9-cis-epoxycarotenoid dioxygenase NCED5, chloroplastic; Short=AtNCED5; EC=1.13.11.51; Flags: Precursor;	A0A118JV69_CYNCS, SubName: Full=Carotenoid oxygenase {ECO:0000313|EMBL:KVH93189.1};
TRINITY_DN84366_c0_g3	35.7077	504.535	-3.83	1.61e-48	1.19e-46	down	GO:0005576,extracellular region; GO:0004190,aspartic-type endopeptidase activity	K01381: PEP4; saccharopepsin [EC:3.4.23.25]	At3g52500	gb|KVI08337.1|	NEP2_NEPGR, RecName: Full=Aspartic proteinase nepenthesin-2; EC=3.4.23.12; AltName: Full=Nepenthesin-II; Flags: Precursor;	A0A103YFV3_CYNCS, SubName: Full=Aspartic peptidase {ECO:0000313|EMBL:KVI08337.1};
TRINITY_DN105254_c8_g3	260.468	1290.75	-2.31	1.75e-48	1.29e-46	down	GO:0005634,nucleus; GO:0005516,calmodulin binding; GO:0003700,DNA binding transcription factor activity; GO:0043565,sequence-specific DNA binding; GO:0001077,transcriptional activator activity, RNA polymerase II proximal promoter sequence-specific DNA binding; GO:0070417,cellular response to cold; GO:0045944,positive regulation of transcription by RNA polymerase II; GO:0006355,regulation of trans…	--	At3g16940	gb|KVH99848.1|	CMTA5_ARATH, RecName: Full=Calmodulin-binding transcription activator 5 {ECO:0000303|PubMed:11925432}; Short=AtCAMTA5 {ECO:0000303|PubMed:11925432}; AltName: Full=Ethylene-induced calmodulin-binding protein f {ECO:0000303|PubMed:11782485}; Short=EICBP.f {ECO:0000303|PubMed:11782485}; AltName: Full=Signal-responsive protein 6 {ECO:0000303|PubMed:12218065}; Short=AtSR6 {ECO:0000303|PubMed:12218065};	A0A103XZP7_CYNCS, SubName: Full=Ankyrin repeat-containing domain-containing protein {ECO:0000313|EMBL:KVH99848.1};
TRINITY_DN100276_c7_g1	141.069	607.614	-2.11	1.83e-48	1.35e-46	down	GO:0009570,chloroplast stroma; GO:0102229,amylopectin maltohydrolase activity; GO:0016161,beta-amylase activity; GO:0000024,maltose biosynthetic process; GO:0009409,response to cold; GO:0005983,starch catabolic process	K01177: E3.2.1.2; beta-amylase [EC:3.2.1.2]	At4g17090	gb|KVH95266.1|	BAM3_ARATH, RecName: Full=Beta-amylase 3, chloroplastic; EC=3.2.1.2; AltName: Full=1,4-alpha-D-glucan maltohydrolase; AltName: Full=Beta-amylase 8; AltName: Full=Chloroplast beta-amylase; Short=CT-BMY; Flags: Precursor;	A0A103XQY4_CYNCS, RecName: Full=Beta-amylase {ECO:0000256|RuleBase:RU000509}; EC=3.2.1.2 {ECO:0000256|RuleBase:RU000509};
TRINITY_DN98864_c2_g1	7.49261	273.136	-5.21	2e-48	1.47e-46	down	GO:0005783,endoplasmic reticulum; GO:0016021,integral component of membrane; GO:0016020,membrane; GO:0005739,mitochondrion; GO:0005886,plasma membrane; GO:0020037,heme binding; GO:0005506,iron ion binding; GO:0016709,oxidoreductase activity, acting on paired donors, with incorporation or reduction of molecular oxygen, NAD(P)H as one donor, and incorporation of one atom of oxygen; GO:0048830,adven…	--	At4g31500	gb|KVH98449.1|	C83B1_ARATH, RecName: Full=Cytochrome P450 83B1; EC=1.14.14.45 {ECO:0000269|PubMed:12970475}; AltName: Full=Protein ALTERED TRYPTOPHAN REGULATION 4; AltName: Full=Protein RED ELONGATED 1; AltName: Full=Protein SUPERROOT 2;	A0A103XX31_CYNCS, SubName: Full=Cytochrome P450 {ECO:0000313|EMBL:KVH98449.1}; Flags: Fragment;
TRINITY_DN98372_c0_g1	74.4194	367.435	-2.3	2.29e-48	1.68e-46	down	GO:0005576,extracellular region; GO:0050660,flavin adenine dinucleotide binding; GO:0046593,mandelonitrile lyase activity; GO:0016614,oxidoreductase activity, acting on CH-OH group of donors; GO:0007267,cell-cell signaling; GO:0009553,embryo sac development; GO:0010430,fatty acid omega-oxidation	--	At5g51950	gb|KVI10141.1|	HTH_ARATH, RecName: Full=Protein HOTHEAD; AltName: Full=Protein ADHESION OF CALYX EDGES; Flags: Precursor;	A0A124SHN9_CYNCS, SubName: Full=Glucose-methanol-choline oxidoreductase {ECO:0000313|EMBL:KVI10141.1}; Flags: Fragment;
TRINITY_DN105423_c2_g1	313.115	2122.13	-2.76	2.47e-48	1.81e-46	down	GO:0016021,integral component of membrane; GO:0005634,nucleus; GO:0005509,calcium ion binding; GO:0009409,response to cold	--	At1g02270	gb|PLY97843.1|	YC22_ARATH, RecName: Full=Uncharacterized calcium-binding protein At1g02270;	A0A2G9G0M0_9LAMI, SubName: Full=Transcriptional effector CCR4-related protein {ECO:0000313|EMBL:PIM98876.1};
TRINITY_DN99539_c0_g2	16881.9	1618.17	3.38	3.06e-48	2.24e-46	up	--	--	--	--	--	--
TRINITY_DN102166_c1_g1	406.33	50.4219	3.01	3.28e-48	2.39e-46	up	GO:0005576,extracellular region; GO:0004252,serine-type endopeptidase activity	--	At5g45650	gb|KVH89437.1|	SBT56_ARATH, RecName: Full=Subtilisin-like protease SBT5.6 {ECO:0000303|PubMed:16193095}; EC=3.4.21.- {ECO:0000255|PROSITE-ProRule:PRU10082}; AltName: Full=Subtilase subfamily 5 member 6 {ECO:0000303|PubMed:16193095}; Short=AtSBT5.6 {ECO:0000303|PubMed:16193095}; Flags: Precursor;	A0A118JSM1_CYNCS, SubName: Full=Peptidase S8/S53 domain-containing protein {ECO:0000313|EMBL:KVH89437.1}; Flags: Fragment;
TRINITY_DN98640_c1_g1	1742.93	5280.13	-1.6	3.71e-48	2.7e-46	down	--	--	--	gb|POF14205.1|	--	--
TRINITY_DN105198_c1_g1	10439.9	2622.21	1.99	3.95e-48	2.87e-46	up	GO:0016021,integral component of membrane; GO:0010295,(+)-abscisic acid 8'-hydroxylase activity; GO:0020037,heme binding; GO:0005506,iron ion binding; GO:0046345,abscisic acid catabolic process; GO:0009687,abscisic acid metabolic process; GO:0016132,brassinosteroid biosynthetic process; GO:0010268,brassinosteroid homeostasis; GO:0048838,release of seed from dormancy; GO:0010114,response to red li…	K09843: CYP707A; (+)-abscisic acid 8'-hydroxylase [EC:1.14.14.137]	At2g29090	gb|PLY74868.1|	ABAH2_ARATH, RecName: Full=Abscisic acid 8'-hydroxylase 2; Short=ABA 8'-hydroxylase 2; EC=1.14.13.93; AltName: Full=Cytochrome P450 707A2;	B1B1U2_LACSA, SubName: Full=ABA 8-oxidase {ECO:0000313|EMBL:BAG12744.1};
TRINITY_DN106240_c0_g1	4975.37	2321.26	1.1	4.03e-48	2.93e-46	up	--	--	--	--	--	--
TRINITY_DN108201_c1_g2	755.427	13198.5	-4.13	4.36e-48	3.16e-46	down	--	--	--	--	--	--
TRINITY_DN108079_c0_g3	11404.2	530.733	4.43	4.97e-48	3.59e-46	up	--	--	--	--	--	--
TRINITY_DN108306_c7_g4	128.581	900.155	-2.81	5.01e-48	3.62e-46	down	--	--	At3g55420	gb|KVI09813.1|	--	A0A118K5Z1_CYNCS, SubName: Full=Uncharacterized protein {ECO:0000313|EMBL:KVI09813.1};
TRINITY_DN96189_c6_g1	17.652	430.061	-4.61	6.21e-48	4.47e-46	down	--	--	--	--	--	--
TRINITY_DN101522_c1_g6	100.417	389.979	-1.96	6.21e-48	4.47e-46	down	GO:0016021,integral component of membrane; GO:0005774,vacuolar membrane; GO:0015171,amino acid transmembrane transporter activity; GO:0003333,amino acid transmembrane transport	K15015: SLC32A, VGAT; solute carrier family 32 (vesicular inhibitory amino acid transporter)	At2g39130	gb|PLY73159.1|	AVT1C_ARATH, RecName: Full=Amino acid transporter AVT1C {ECO:0000305}; Short=AtAvt1C {ECO:0000303|PubMed:27925655};	A0A103YII1_CYNCS, SubName: Full=Amino acid transporter, transmembrane {ECO:0000313|EMBL:KVI09698.1};
TRINITY_DN99491_c3_g1	436.418	7.92533	5.77	6.62e-48	4.76e-46	up	GO:0016021,integral component of membrane; GO:0005886,plasma membrane; GO:0005524,ATP binding; GO:0004674,protein serine/threonine kinase activity; GO:0042742,defense response to bacterium; GO:0006468,protein phosphorylation	K04733: IRAK4; interleukin-1 receptor-associated kinase 4 [EC:2.7.11.1]	At4g05200	gb|KVH87510.1|	CRK25_ARATH, RecName: Full=Cysteine-rich receptor-like protein kinase 25; Short=Cysteine-rich RLK25; EC=2.7.11.-; Flags: Precursor;	A0A103XB75_CYNCS, SubName: Full=Concanavalin A-like lectin/glucanase, subgroup {ECO:0000313|EMBL:KVH87510.1};
TRINITY_DN106513_c1_g6	8620.4	1794.59	2.26	6.65e-48	4.78e-46	up	--	--	--	--	--	--
TRINITY_DN80534_c0_g4	928.675	36.6997	4.67	8.05e-48	5.77e-46	up	--	--	--	--	--	--
TRINITY_DN96941_c1_g6	6994.61	672.264	3.38	9.58e-48	6.86e-46	up	--	--	--	--	--	--
TRINITY_DN100532_c0_g2	931.277	169.211	2.46	9.61e-48	6.87e-46	up	GO:0016020,membrane; GO:0020037,heme binding; GO:0005506,iron ion binding; GO:0033773,isoflavone 2'-hydroxylase activity	--	At4g37330	ref|XP_022015578.1|	C81E1_GLYEC, RecName: Full=Isoflavone 2'-hydroxylase; EC=1.14.13.89; AltName: Full=CYP GE-3; AltName: Full=Cytochrome P450 81E1; AltName: Full=Cytochrome P450 91A4;	A0A251VEA9_HELAN, SubName: Full=Putative cytochrome P450, family 81, subfamily D, polypeptide 3 {ECO:0000313|EMBL:OTG33925.1};
TRINITY_DN96918_c10_g1	470.786	25.7391	4.2	1.02e-47	7.26e-46	up	GO:0009941,chloroplast envelope; GO:0005886,plasma membrane; GO:0016491,oxidoreductase activity	K05275: E1.1.1.65; pyridoxine 4-dehydrogenase [EC:1.1.1.65]	At1g60690	gb|PLY99649.1|	ALKR3_ARATH, RecName: Full=Probable aldo-keto reductase 3; EC=1.1.1.-;	A0A103XHT1_CYNCS, SubName: Full=Aldo/keto reductase {ECO:0000313|EMBL:KVH90947.1};
TRINITY_DN97697_c0_g1	110.252	561.217	-2.34	1.46e-47	1.04e-45	down	GO:0005634,nucleus; GO:0003700,DNA binding transcription factor activity; GO:0043565,sequence-specific DNA binding; GO:0048826,cotyledon morphogenesis; GO:0009965,leaf morphogenesis; GO:0080022,primary root development; GO:0009744,response to sucrose; GO:0006351,transcription, DNA-templated	--	At1g69780	gb|KVH97736.1|	ATB13_ARATH, RecName: Full=Homeobox-leucine zipper protein ATHB-13; AltName: Full=HD-ZIP protein ATHB-13; AltName: Full=Homeodomain transcription factor ATHB-13;	A0A118JXY2_CYNCS, SubName: Full=Helix-turn-helix motif-containing protein {ECO:0000313|EMBL:KVH97736.1};
TRINITY_DN96700_c1_g5	1031.15	3329.42	-1.69	1.66e-47	1.18e-45	down	GO:0031225,anchored component of membrane; GO:0046658,anchored component of plasma membrane; GO:0005783,endoplasmic reticulum; GO:0005576,extracellular region; GO:0005794,Golgi apparatus; GO:0009505,plant-type cell wall; GO:0005886,plasma membrane; GO:0008289,lipid binding; GO:0042335,cuticle development; GO:0050832,defense response to fungus; GO:0006869,lipid transport	--	At1g27950	gb|KVH97825.1|	LTPG1_ARATH, RecName: Full=Non-specific lipid transfer protein GPI-anchored 1; Short=AtLTPG-1; Short=Protein LTP-GPI-ANCHORED 1; Flags: Precursor;	A0A124SDS6_CYNCS, SubName: Full=Bifunctional inhibitor/plant lipid transfer protein/seed storage helical domain-containing protein {ECO:0000313|EMBL:KVH97825.1};
TRINITY_DN95003_c0_g1	1036.86	3804.28	-1.88	1.68e-47	1.2e-45	down	GO:0005737,cytoplasm; GO:0003871,5-methyltetrahydropteroyltriglutamate-homocysteine S-methyltransferase activity; GO:0008270,zinc ion binding; GO:0009086,methionine biosynthetic process	K00549: metE; 5-methyltetrahydropteroyltriglutamate--homocysteine methyltransferase [EC:2.1.1.14]	At5g17920	gb|PLY94788.1|	METE_PLESU, RecName: Full=5-methyltetrahydropteroyltriglutamate--homocysteine methyltransferase; EC=2.1.1.14; AltName: Full=Cobalamin-independent methionine synthase isozyme; AltName: Full=Vitamin-B12-independent methionine synthase isozyme;	A0A251UD42_HELAN, SubName: Full=Putative cobalamin-independent methionine synthase {ECO:0000313|EMBL:OTG20806.1};
TRINITY_DN105823_c3_g2	429.984	9.89876	5.43	2.15e-47	1.53e-45	up	--	--	--	--	--	--
TRINITY_DN104904_c5_g1	732.965	155.558	2.23	2.16e-47	1.53e-45	up	--	--	At3g20340	gb|KVH99142.1|	--	A0A118JZA2_CYNCS, SubName: Full=Uncharacterized protein {ECO:0000313|EMBL:KVH99142.1};
TRINITY_DN101464_c1_g1	572.583	5288.5	-3.21	2.9e-47	2.05e-45	down	GO:0005524,ATP binding; GO:0004672,protein kinase activity	K04733: IRAK4; interleukin-1 receptor-associated kinase 4 [EC:2.7.11.1]	At3g13690	gb|PLY65740.1|	Y4407_SELML, RecName: Full=Inactive protein kinase SELMODRAFT_444075;	A0A251SZN2_HELAN, SubName: Full=Putative vascular endothelial growth factor receptor 2 (VEGFR2) {ECO:0000313|EMBL:OTG03746.1};
TRINITY_DN107963_c5_g5	1176.18	345.209	1.77	3.27e-47	2.31e-45	up	--	--	At1g26920	gb|KVH97741.1|	--	A0A103XVT9_CYNCS, SubName: Full=Uncharacterized protein {ECO:0000313|EMBL:KVH97741.1};
TRINITY_DN96801_c0_g1	450.805	16.4303	4.78	3.47e-47	2.45e-45	up	GO:0005737,cytoplasm; GO:0009734,auxin-activated signaling pathway; GO:0007275,multicellular organism development; GO:0040008,regulation of growth	K14488: SAUR; SAUR family protein	At5g50760	gb|KVI06148.1|	SAU71_ARATH, RecName: Full=Auxin-responsive protein SAUR71 {ECO:0000305}; AltName: Full=Protein SMALL AUXIN UP RNA 71 {ECO:0000303|PubMed:12036261};	A0A124SGE5_CYNCS, SubName: Full=Auxin responsive SAUR protein {ECO:0000313|EMBL:KVI06148.1};
TRINITY_DN103028_c0_g3	252.443	1242.83	-2.3	4.13e-47	2.92e-45	down	GO:0030176,integral component of endoplasmic reticulum membrane; GO:0005634,nucleus; GO:0102343,3-hydroxy-arachidoyl-CoA dehydratase activity; GO:0102344,3-hydroxy-behenoyl-CoA dehydratase activity; GO:0102345,3-hydroxy-lignoceroyl-CoA dehydratase activity; GO:0018812,3-hydroxyacyl-CoA dehydratase activity; GO:0102158,very-long-chain 3-hydroxyacyl-CoA dehydratase activity; GO:0030497,fatty acid e…	K10703: PHS1, PAS2; very-long-chain (3R)-3-hydroxyacyl-CoA dehydratase [EC:4.2.1.134]	At5g10480	gb|PLY72447.1|	HACD_ARATH, RecName: Full=Very-long-chain (3R)-3-hydroxyacyl-CoA dehydratase PASTICCINO 2 {ECO:0000305}; EC=4.2.1.134 {ECO:0000305|PubMed:18799749}; AltName: Full=3-hydroxyacyl-CoA dehydratase PASTICCINO 2; Short=AtPAS2; Short=HACD; Short=HCD; AltName: Full=Protein PEPINO; Short=PEP; AltName: Full=Protein tyrosine phosphatase-like protein;	A0A103YGJ3_CYNCS, RecName: Full=Very-long-chain (3R)-3-hydroxyacyl-CoA dehydratase {ECO:0000256|RuleBase:RU363109}; EC=4.2.1.134 {ECO:0000256|RuleBase:RU363109};
TRINITY_DN107812_c6_g2	145.62	577.303	-1.99	4.68e-47	3.29e-45	down	GO:0000139,Golgi membrane; GO:0005886,plasma membrane; GO:0015031,protein transport	--	At2g21520	gb|KVI01992.1|	SFH8_ARATH, RecName: Full=Phosphatidylinositol/phosphatidylcholine transfer protein SFH8; AltName: Full=Protein SEC FOURTEEN HOMOLOGS 8; Short=AtSFH8;	A0A103Y3S5_CYNCS, SubName: Full=Cellular retinaldehyde binding/alpha-tocopherol transport {ECO:0000313|EMBL:KVI01992.1};
TRINITY_DN94775_c0_g1	162.3	633.667	-1.96	4.74e-47	3.34e-45	down	--	--	--	--	--	--
TRINITY_DN103202_c1_g1	7.98829	262.188	-5.03	5.74e-47	4.03e-45	down	GO:0005576,extracellular region	K03006: RPB1, POLR2A; DNA-directed RNA polymerase II subunit RPB1 [EC:2.7.7.6]	At2g42840	gb|PLY71769.1|	PDF1_ARATH, RecName: Full=Protodermal factor 1; Flags: Precursor;	A0A251UH50_HELAN, SubName: Full=Uncharacterized protein {ECO:0000313|EMBL:OTG22424.1};
TRINITY_DN103012_c0_g2	6730.65	73426.7	-3.45	5.82e-47	4.08e-45	down	--	--	Hs7705566	--	--	--
TRINITY_DN106679_c1_g2	25.2335	528.143	-4.38	6.89e-47	4.82e-45	down	GO:0005618,cell wall; GO:0009941,chloroplast envelope; GO:0009570,chloroplast stroma; GO:0005856,cytoskeleton; GO:0005829,cytosol; GO:0005739,mitochondrion; GO:0005730,nucleolus; GO:0005886,plasma membrane; GO:0009506,plasmodesma; GO:0005524,ATP binding; GO:0005200,structural constituent of cytoskeleton; GO:0051301,cell division; GO:0009733,response to auxin; GO:0009416,response to light stimulus…	--	At5g09810	gb|OMO55847.1|	ACT7_ARATH, RecName: Full=Actin-7; AltName: Full=Actin-2;	A0A166GN99_DAUCA, SubName: Full=Uncharacterized protein {ECO:0000313|EMBL:KZN09155.1};
TRINITY_DN108250_c0_g2	1375.39	148.848	3.21	6.99e-47	4.88e-45	up	GO:0004353,glutamate dehydrogenase [NAD(P)+] activity; GO:0006520,cellular amino acid metabolic process	K00261: GLUD1_2, gdhA; glutamate dehydrogenase (NAD(P)+) [EC:1.4.1.3]	At5g07440	gb|KVI04507.1|	DHEA_NICPL, RecName: Full=Glutamate dehydrogenase A; Short=GDH A; EC=1.4.1.3;	A0A103Y8K3_CYNCS, RecName: Full=Glutamate dehydrogenase {ECO:0000256|PIRNR:PIRNR000185};
TRINITY_DN96625_c1_g3	435.059	1068.24	-1.3	7.54e-47	5.26e-45	down	GO:0048046,apoplast; GO:0009507,chloroplast; GO:0009570,chloroplast stroma; GO:0010319,stromule; GO:0004601,peroxidase activity; GO:0051920,peroxiredoxin activity; GO:0045454,cell redox homeostasis; GO:0042742,defense response to bacterium; GO:0009409,response to cold	K03386: PRDX2_4, ahpC; peroxiredoxin (alkyl hydroperoxide reductase subunit C) [EC:1.11.1.15]	At5g06290	gb|KVH88267.1|	BAS1B_ARATH, RecName: Full=2-Cys peroxiredoxin BAS1-like, chloroplastic; Short=2-Cys Prx B; Short=2-Cys peroxiredoxin B; EC=1.11.1.15; AltName: Full=Thiol-specific antioxidant protein B; Flags: Precursor;	A0A118JRV9_CYNCS, SubName: Full=Alkyl hydroperoxide reductase subunit C/ Thiol specific antioxidant {ECO:0000313|EMBL:KVH88267.1};
TRINITY_DN90162_c0_g1	26.8709	314.009	-3.55	9.58e-47	6.67e-45	down	--	--	At2g10940	ref|XP_021990269.1|	PRF1_SOLLC, RecName: Full=36.4 kDa proline-rich protein;	A0A251TQ30_HELAN, SubName: Full=Uncharacterized protein {ECO:0000313|EMBL:OTG13004.1};
TRINITY_DN107599_c2_g2	218.01	1347.98	-2.63	1.04e-46	7.22e-45	down	--	K03350: APC3, CDC27; anaphase-promoting complex subunit 3	At1g52140	gb|KVH97992.1|	--	A0A124SDT9_CYNCS, SubName: Full=Uncharacterized protein {ECO:0000313|EMBL:KVH97992.1};
TRINITY_DN103142_c0_g2	1232.4	471.334	1.39	1.1e-46	7.62e-45	up	GO:0009507,chloroplast; GO:0009941,chloroplast envelope; GO:0009534,chloroplast thylakoid; GO:0009535,chloroplast thylakoid membrane; GO:0016021,integral component of membrane; GO:0016020,membrane; GO:0031977,thylakoid lumen; GO:0005524,ATP binding; GO:0004176,ATP-dependent peptidase activity; GO:0046872,metal ion binding; GO:0004222,metalloendopeptidase activity; GO:0008237,metallopeptidase acti…	--	At5g53540	ref|XP_018842807.1|	FTSH1_ARATH, RecName: Full=ATP-dependent zinc metalloprotease FTSH 1, chloroplastic; Short=AtFTSH1; EC=3.4.24.-; Flags: Precursor;	A0A2I4GFZ0_9ROSI, SubName: Full=ATPase family AAA domain-containing protein 1-B-like isoform X1 {ECO:0000313|RefSeq:XP_018842807.1};
TRINITY_DN108246_c1_g2	749.116	135.974	2.46	1.23e-46	8.51e-45	up	--	--	--	--	--	--
TRINITY_DN93414_c0_g1	1809.64	3794.24	-1.07	1.31e-46	9.04e-45	down	--	--	--	--	--	--
TRINITY_DN105807_c0_g1	2663.81	317.356	3.07	1.32e-46	9.15e-45	up	GO:0009570,chloroplast stroma; GO:0009534,chloroplast thylakoid; GO:0016165,linoleate 13S-lipoxygenase activity; GO:0046872,metal ion binding; GO:0010597,green leaf volatile biosynthetic process; GO:0031408,oxylipin biosynthetic process	K00454: LOX2S; lipoxygenase [EC:1.13.11.12]	At3g45140	gb|KVH90897.1|	LOX21_SOLTU, RecName: Full=Linoleate 13S-lipoxygenase 2-1, chloroplastic; EC=1.13.11.12; AltName: Full=Lipoxygenase 2-1; Flags: Precursor;	A0A118JUA2_CYNCS, RecName: Full=Lipoxygenase {ECO:0000256|RuleBase:RU003975}; EC=1.13.11.- {ECO:0000256|RuleBase:RU003975}; Flags: Fragment;
TRINITY_DN98592_c1_g2	3.87504	421.73	-6.78	1.42e-46	9.78e-45	down	GO:0048046,apoplast; GO:0005622,intracellular; GO:0009506,plasmodesma; GO:0005179,hormone activity; GO:0004871,signal transducer activity; GO:0019722,calcium-mediated signaling; GO:0007267,cell-cell signaling; GO:0080092,regulation of pollen tube growth	--	At1g28270	gb|KVH96799.1|	RLF4_ARATH, RecName: Full=Protein RALF-like 4; Flags: Precursor;	A0A103XTX4_CYNCS, SubName: Full=Rapid ALkalinization Factor {ECO:0000313|EMBL:KVH96799.1};
TRINITY_DN106911_c0_g4	1.34731	1769.65	-10.43	1.44e-46	9.91e-45	down	GO:0031225,anchored component of membrane; GO:0031012,extracellular matrix; GO:0005886,plasma membrane; GO:0004222,metalloendopeptidase activity; GO:0008270,zinc ion binding	--	At1g59970	gb|KVH92768.1|	5MMP_ARATH, RecName: Full=Metalloendoproteinase 5-MMP {ECO:0000303|PubMed:10574937}; Short=At5-MMP {ECO:0000303|PubMed:10574937}; EC=3.4.24.- {ECO:0000305}; Flags: Precursor;	A0A103XLB1_CYNCS, SubName: Full=Metallopeptidase, catalytic domain-containing protein {ECO:0000313|EMBL:KVH92768.1};
TRINITY_DN96734_c3_g1	426.679	890.885	-1.06	1.52e-46	1.05e-44	down	GO:0005783,endoplasmic reticulum; GO:0005794,Golgi apparatus; GO:0030176,integral component of endoplasmic reticulum membrane; GO:0005739,mitochondrion; GO:0005886,plasma membrane; GO:0008565,protein transporter activity; GO:0031204,posttranslational protein targeting to membrane, translocation	K09540: SEC63, DNAJC23; translocation protein SEC63	At1g79940_2	gb|KVI12212.1|	DNJ21_ARATH, RecName: Full=DnaJ protein ERDJ2A; AltName: Full=Chaperone protein dnaJ 21; Short=AtDjC21; Short=AtJ21; AltName: Full=Endoplasmic reticulum dnaJ domain-containing protein 2A; Short=AtERdj2A; AltName: Full=Translocation protein SEC63 homolog ERDJ2A;	A0A124SIC1_CYNCS, SubName: Full=DnaJ domain-containing protein {ECO:0000313|EMBL:KVI12212.1};
TRINITY_DN101237_c2_g1	2.2831	661.512	-8.2	2.59e-46	1.78e-44	down	--	--	--	gb|KVD98080.1|	--	A0A118DD24_CYNCS, SubName: Full=Uncharacterized protein {ECO:0000313|EMBL:KVD98080.1}; Flags: Fragment;
TRINITY_DN101237_c2_g4	2.3117	587.17	-8.03	2.63e-46	1.81e-44	down	--	--	--	ref|XP_002977344.1|	--	D8S1T3_SELML, SubName: Full=Uncharacterized protein {ECO:0000313|EMBL:EFJ21348.1}; Flags: Fragment;
TRINITY_DN97585_c2_g3	5.51541	245.362	-5.49	2.67e-46	1.83e-44	down	GO:0005789,endoplasmic reticulum membrane; GO:0016021,integral component of membrane; GO:0020037,heme binding; GO:0005506,iron ion binding; GO:0004497,monooxygenase activity; GO:0016705,oxidoreductase activity, acting on paired donors, with incorporation or reduction of molecular oxygen	K20769: CYP94A5; fatty acid omega-hydroxylase [EC:1.14.-.-]	At3g56630	gb|KVI11755.1|	C94A1_VICSA, RecName: Full=Cytochrome P450 94A1; EC=1.14.-.-; AltName: Full=P450-dependent fatty acid omega-hydroxylase;	A0A103YMI2_CYNCS, SubName: Full=Cytochrome P450 {ECO:0000313|EMBL:KVI11755.1};
TRINITY_DN108460_c4_g1	400.002	2240.78	-2.49	2.74e-46	1.88e-44	down	GO:0005634,nucleus; GO:0005516,calmodulin binding; GO:0003700,DNA binding transcription factor activity; GO:0043565,sequence-specific DNA binding; GO:0001077,transcriptional activator activity, RNA polymerase II proximal promoter sequence-specific DNA binding; GO:0070417,cellular response to cold; GO:0045944,positive regulation of transcription by RNA polymerase II; GO:0006355,regulation of trans…	--	At4g16150	gb|KVH99848.1|	CMTA5_ARATH, RecName: Full=Calmodulin-binding transcription activator 5 {ECO:0000303|PubMed:11925432}; Short=AtCAMTA5 {ECO:0000303|PubMed:11925432}; AltName: Full=Ethylene-induced calmodulin-binding protein f {ECO:0000303|PubMed:11782485}; Short=EICBP.f {ECO:0000303|PubMed:11782485}; AltName: Full=Signal-responsive protein 6 {ECO:0000303|PubMed:12218065}; Short=AtSR6 {ECO:0000303|PubMed:12218065};	A0A103XZP7_CYNCS, SubName: Full=Ankyrin repeat-containing domain-containing protein {ECO:0000313|EMBL:KVH99848.1};
TRINITY_DN90607_c0_g1	2.2195	551.094	-7.94	2.78e-46	1.91e-44	down	GO:0016021,integral component of membrane	--	At2g45180	gb|KVH95511.1|	14KD_DAUCA, RecName: Full=14 kDa proline-rich protein DC2.15; Flags: Precursor;	A0A103XRE2_CYNCS, SubName: Full=Bifunctional inhibitor/plant lipid transfer protein/seed storage helical domain-containing protein {ECO:0000313|EMBL:KVH95511.1};
TRINITY_DN100276_c7_g2	148.253	466.288	-1.66	4.33e-46	2.96e-44	down	GO:0009570,chloroplast stroma; GO:0102229,amylopectin maltohydrolase activity; GO:0016161,beta-amylase activity; GO:0000024,maltose biosynthetic process; GO:0009409,response to cold; GO:0005983,starch catabolic process	K01177: E3.2.1.2; beta-amylase [EC:3.2.1.2]	At4g17090	gb|KVH95266.1|	BAM3_ARATH, RecName: Full=Beta-amylase 3, chloroplastic; EC=3.2.1.2; AltName: Full=1,4-alpha-D-glucan maltohydrolase; AltName: Full=Beta-amylase 8; AltName: Full=Chloroplast beta-amylase; Short=CT-BMY; Flags: Precursor;	A0A103XQY4_CYNCS, RecName: Full=Beta-amylase {ECO:0000256|RuleBase:RU000509}; EC=3.2.1.2 {ECO:0000256|RuleBase:RU000509};
TRINITY_DN104828_c0_g1	46.1841	355.713	-2.95	4.95e-46	3.38e-44	down	GO:0005509,calcium ion binding; GO:0010091,trichome branching	K13448: CML; calcium-binding protein CML	At4g20780	gb|KVH94937.1|	CML42_ARATH, RecName: Full=Calcium-binding protein CML42; AltName: Full=Calmodulin-like protein 42;	A0A103XQA4_CYNCS, SubName: Full=Calcium-binding EF-hand {ECO:0000313|EMBL:KVH94937.1};
TRINITY_DN102436_c3_g4	21.4587	242.997	-3.5	5.67e-46	3.86e-44	down	--	--	--	--	--	--
TRINITY_DN105574_c0_g1	86.1675	452.193	-2.39	5.93e-46	4.04e-44	down	GO:0005829,cytosol; GO:0016740,transferase activity; GO:0009846,pollen germination; GO:0009860,pollen tube growth; GO:0007338,single fertilization	--	At1g64980	gb|KVI05970.1|	CDI_ARATH, RecName: Full=Protein CDI {ECO:0000305}; AltName: Full=Protein CADMIUM INDUCED {ECO:0000303|PubMed:22569258};	A0A118K3H7_CYNCS, SubName: Full=Uncharacterized protein {ECO:0000313|EMBL:KVI05970.1};
TRINITY_DN107295_c10_g2	908.72	22.0293	5.36	6.57e-46	4.47e-44	up	--	--	--	ref|XP_016580654.1|	--	A0A1U8HJF0_CAPAN, SubName: Full=uncharacterized protein LOC107878250 {ECO:0000313|RefSeq:XP_016580654.1};
TRINITY_DN99328_c1_g1	80.4583	564.397	-2.81	7.99e-46	5.42e-44	down	--	--	At5g08580	gb|PLY71729.1|	--	A0A251UH70_HELAN, SubName: Full=Putative calcium-binding EF hand family protein {ECO:0000313|EMBL:OTG22444.1};
TRINITY_DN87572_c0_g1	17.8609	715.356	-5.33	1.33e-45	9.04e-44	down	--	--	--	--	--	--
TRINITY_DN101611_c3_g3	1385.15	25.4087	5.77	1.52e-45	1.03e-43	up	GO:0005622,intracellular; GO:0005524,ATP binding; GO:0004672,protein kinase activity; GO:0004674,protein serine/threonine kinase activity; GO:0035556,intracellular signal transduction; GO:0018105,peptidyl-serine phosphorylation; GO:0018107,peptidyl-threonine phosphorylation; GO:0006468,protein phosphorylation; GO:0009268,response to pH	K07198: PRKAA, AMPK; 5'-AMP-activated protein kinase, catalytic alpha subunit [EC:2.7.11.11]	At2g30360	gb|KVI03727.1|	CIPKB_ARATH, RecName: Full=CBL-interacting serine/threonine-protein kinase 11; EC=2.7.11.1; AltName: Full=SNF1-related kinase 3.22; AltName: Full=SOS2-like protein kinase PKS5; AltName: Full=SOS3-interacting protein 4;	A0A103Y738_CYNCS, RecName: Full=Non-specific serine/threonine protein kinase {ECO:0000256|SAAS:SAAS00351747}; EC=2.7.11.1 {ECO:0000256|SAAS:SAAS00351747};
TRINITY_DN107380_c0_g5	1824.84	19658	-3.43	1.61e-45	1.09e-43	down	--	--	--	--	--	--
TRINITY_DN105025_c5_g3	89.8775	340.44	-1.92	1.86e-45	1.26e-43	down	--	--	--	--	--	--
TRINITY_DN105002_c1_g2	947.128	3713.31	-1.97	1.88e-45	1.27e-43	down	GO:0016021,integral component of membrane; GO:0016717,oxidoreductase activity, acting on paired donors, with oxidation of a pair of donors resulting in the reduction of molecular oxygen to two molecules of water; GO:0006636,unsaturated fatty acid biosynthetic process	K10256: FAD2; omega-6 fatty acid desaturase / acyl-lipid omega-6 desaturase (Delta-12 desaturase) [EC:1.14.19.6 1.14.19.22]	At3g12120	gb|ADM48789.1|	FAD2_CALOF, RecName: Full=Delta(12) fatty acid desaturase FAD2 {ECO:0000303|PubMed:11161042}; Short=CoFad2 {ECO:0000303|PubMed:11161042}; EC=1.14.19.- {ECO:0000305};	E9M2L7_CARTI, SubName: Full=FAD2-2 protein {ECO:0000313|EMBL:AGC65499.1}; EC=1.14.19.6 {ECO:0000313|EMBL:AGC65499.1}; SubName: Full=Microsomal oleate desaturase {ECO:0000313|EMBL:ADM48789.1};
TRINITY_DN108307_c1_g1	5755.7	1048.8	2.46	1.92e-45	1.29e-43	up	--	--	At1g42690	ref|XP_021974494.1|	--	A0A251RZL3_HELAN, SubName: Full=Uncharacterized protein {ECO:0000313|EMBL:OTF91885.1};
TRINITY_DN101576_c0_g4	260.456	752.43	-1.53	2.06e-45	1.39e-43	down	GO:0005829,cytosol; GO:0005634,nucleus; GO:0051287,NAD binding; GO:0003979,UDP-glucose 6-dehydrogenase activity; GO:0005975,carbohydrate metabolic process; GO:0052546,cell wall pectin metabolic process; GO:0006024,glycosaminoglycan biosynthetic process; GO:0006065,UDP-glucuronate biosynthetic process	K00012: UGDH, ugd; UDPglucose 6-dehydrogenase [EC:1.1.1.22]	At3g29360	gb|KVI09089.1|	UGDH2_ARATH, RecName: Full=UDP-glucose 6-dehydrogenase 2; Short=UDP-Glc dehydrogenase 2; Short=UDP-GlcDH 2; Short=UDPGDH 2; EC=1.1.1.22; AltName: Full=At-UGD2;	A0A103YHA3_CYNCS, RecName: Full=UDP-glucose 6-dehydrogenase {ECO:0000256|PIRNR:PIRNR000124}; EC=1.1.1.22 {ECO:0000256|PIRNR:PIRNR000124};
TRINITY_DN105002_c1_g1	667.157	2091.84	-1.65	2.23e-45	1.5e-43	down	--	--	--	--	--	--
TRINITY_DN89147_c0_g1	3.2189	742.804	-7.86	3.09e-45	2.07e-43	down	--	--	At2g46490	gb|KVH88314.1|	--	A0A118JSI3_CYNCS, SubName: Full=Zinc finger, SWIM-type {ECO:0000313|EMBL:KVH88314.1};
TRINITY_DN97032_c0_g1	244.457	1552.94	-2.67	3.18e-45	2.13e-43	down	--	--	--	--	--	--
TRINITY_DN96760_c1_g2	182.923	524.62	-1.52	3.24e-45	2.17e-43	down	GO:0016021,integral component of membrane; GO:0042538,hyperosmotic salinity response; GO:0009737,response to abscisic acid; GO:0009409,response to cold; GO:0009414,response to water deprivation	--	At5g50720	gb|KVI06167.1|	HA22E_ARATH, RecName: Full=HVA22-like protein e; Short=AtHVA22e;	A0A118K3M7_CYNCS, RecName: Full=HVA22-like protein {ECO:0000256|RuleBase:RU362006}; Flags: Fragment;
TRINITY_DN105939_c1_g1	1443.63	15075.8	-3.38	3.25e-45	2.17e-43	down	GO:0046658,anchored component of plasma membrane; GO:0005887,integral component of plasma membrane; GO:0016020,membrane; GO:0005634,nucleus; GO:0005886,plasma membrane; GO:0009506,plasmodesma; GO:0005773,vacuole; GO:0003729,mRNA binding; GO:0015250,water channel activity; GO:0034220,ion transmembrane transport; GO:0009737,response to abscisic acid	--	At4g35100	gb|KVH96039.1|	PIP27_ARATH, RecName: Full=Aquaporin PIP2-7; AltName: Full=Plasma membrane intrinsic protein 2-7; Short=AtPIP2;7; AltName: Full=Plasma membrane intrinsic protein 3; AltName: Full=Salt stress-induced major intrinsic protein;	A0A118JWT1_CYNCS, SubName: Full=Aquaporin-like protein {ECO:0000313|EMBL:KVH96039.1};
TRINITY_DN101681_c2_g1	121.485	1673.85	-3.79	3.34e-45	2.23e-43	down	GO:0010494,cytoplasmic stress granule; GO:0000932,P-body; GO:0046872,metal ion binding; GO:0009737,response to abscisic acid; GO:0010162,seed dormancy process	--	At5g20700	gb|KVH87954.1|	MARD1_ARATH, RecName: Full=Protein MARD1 {ECO:0000303|PubMed:15159630}; AltName: Full=Mediator of ABA-regulated dormancy1 {ECO:0000303|PubMed:15159630}; AltName: Full=Senescence-associated protein SAG102 {ECO:0000303|PubMed:11402199};	A0A118JS83_CYNCS, SubName: Full=Uncharacterized protein {ECO:0000313|EMBL:KVH87954.1};
TRINITY_DN97255_c2_g1	426.196	34.5379	3.63	3.35e-45	2.24e-43	up	--	K01728: pel; pectate lyase [EC:4.2.2.2]	At1g50720	ref|XP_022013850.1|	STGL3_ARATH, RecName: Full=Stigma-specific STIG1-like protein 3 {ECO:0000303|PubMed:19279211}; Flags: Precursor;	A0A118K5P0_CYNCS, SubName: Full=Stigma-specific protein Stig1 {ECO:0000313|EMBL:KVI09375.1};
TRINITY_DN107957_c3_g1	139.25	1435.97	-3.37	4.24e-45	2.82e-43	down	GO:0031225,anchored component of membrane; GO:0046658,anchored component of plasma membrane; GO:0048046,apoplast; GO:0005618,cell wall; GO:0005886,plasma membrane; GO:0048364,root development; GO:0048367,shoot system development	--	At5g55730	gb|KVH99188.1|	FLA1_ARATH, RecName: Full=Fasciclin-like arabinogalactan protein 1; Flags: Precursor;	A0A103XYC8_CYNCS, SubName: Full=FAS1 domain-containing protein {ECO:0000313|EMBL:KVH99188.1};
TRINITY_DN106701_c1_g1	191.654	1130	-2.56	4.38e-45	2.91e-43	down	--	--	At1g52140	gb|KVH97992.1|	--	A0A124SDT9_CYNCS, SubName: Full=Uncharacterized protein {ECO:0000313|EMBL:KVH97992.1};
TRINITY_DN101208_c3_g2	763.21	213.418	1.84	4.57e-45	3.04e-43	up	--	--	--	--	--	--
TRINITY_DN107168_c4_g1	4082.11	1011.29	2.01	4.68e-45	3.11e-43	up	GO:0000794,condensed nuclear chromosome; GO:0005654,nucleoplasm; GO:0005524,ATP binding; GO:0008094,DNA-dependent ATPase activity; GO:0003690,double-stranded DNA binding; GO:0000400,four-way junction DNA binding; GO:0000150,recombinase activity; GO:0003697,single-stranded DNA binding; GO:0070192,chromosome organization involved in meiotic cell cycle; GO:0000730,DNA recombinase assembly; GO:000631…	K10872: DMC1; meiotic recombination protein DMC1	At3g22880	ref|XP_022027347.1|	DMC1_SOYBN, RecName: Full=Meiotic recombination protein DMC1 homolog;	A5HIJ7_9ASTR, SubName: Full=DMC1 {ECO:0000313|EMBL:ABP98984.1};
TRINITY_DN103284_c2_g1	315.241	1999.37	-2.67	5.49e-45	3.63e-43	down	GO:0005524,ATP binding; GO:0004674,protein serine/threonine kinase activity; GO:0009738,abscisic acid-activated signaling pathway	K14498: SNRK2; serine/threonine-protein kinase SRK2 [EC:2.7.11.1]	At4g33950	ref|XP_021973285.1|	SAPK2_ORYSI, RecName: Full=Serine/threonine-protein kinase SAPK2; EC=2.7.11.1; AltName: Full=Osmotic stress/abscisic acid-activated protein kinase 2;	A0A251UBJ0_HELAN, SubName: Full=Putative serine/threonine-protein kinase SAPK1 {ECO:0000313|EMBL:OTG20730.1};
TRINITY_DN103139_c2_g1	17.1984	237.311	-3.78	5.72e-45	3.78e-43	down	GO:0009507,chloroplast; GO:0009941,chloroplast envelope; GO:0031969,chloroplast membrane; GO:0016021,integral component of membrane; GO:0015230,FAD transmembrane transporter activity; GO:0006839,mitochondrial transport	--	At5g66380	gb|PLY96101.1|	FOLT1_ARATH, RecName: Full=Folate transporter 1, chloroplastic; Short=AtFOLT1;	A0A103YGR6_CYNCS, SubName: Full=Mitochondrial carrier domain-containing protein {ECO:0000313|EMBL:KVI08798.1};
TRINITY_DN99407_c0_g1	291.035	10.8316	4.76	8.96e-45	5.92e-43	up	--	--	At5g54370	ref|XP_022017805.1|	--	A0A251S9Y0_HELAN, SubName: Full=Putative late embryogenesis abundant (LEA) protein-related protein {ECO:0000313|EMBL:OTF95644.1};
TRINITY_DN102550_c1_g1	612.371	108.295	2.5	1.09e-44	7.2e-43	up	GO:0005737,cytoplasm; GO:0047458,beta-pyrazolylalanine synthase activity; GO:0004124,cysteine synthase activity; GO:0050461,L-mimosine synthase activity; GO:0050234,pyrazolylalanine synthase activity; GO:0006535,cysteine biosynthetic process from serine	K01738: cysK; cysteine synthase [EC:2.5.1.47]	At3g22460	gb|KVI06523.1|	CYSK_CITLA, RecName: Full=Cysteine synthase {ECO:0000303|PubMed:8280125}; Short=CSase; EC=2.5.1.47 {ECO:0000269|PubMed:8280125, ECO:0000269|PubMed:9013806}; AltName: Full=Beta-PA/CSase; EC=2.5.1.51 {ECO:0000269|PubMed:8280125, ECO:0000269|PubMed:9013806}; AltName: Full=Beta-pyrazolylalanine synthase {ECO:0000303|PubMed:8280125}; EC=4.2.1.50 {ECO:0000269|PubMed:8280125, ECO:0000269|PubMed:9013806}…	A0A118K3V3_CYNCS, RecName: Full=Cysteine synthase {ECO:0000256|RuleBase:RU003985}; EC=2.5.1.47 {ECO:0000256|RuleBase:RU003985};
TRINITY_DN108246_c1_g1	15314.3	1635.22	3.23	1.1e-44	7.21e-43	up	GO:0005739,mitochondrion; GO:0005774,vacuolar membrane; GO:0005524,ATP binding; GO:0050897,cobalt ion binding; GO:0005507,copper ion binding; GO:0004352,glutamate dehydrogenase (NAD+) activity; GO:0004353,glutamate dehydrogenase [NAD(P)+] activity; GO:0008270,zinc ion binding; GO:0006520,cellular amino acid metabolic process; GO:0046686,response to cadmium ion; GO:0009651,response to salt stress	K00261: GLUD1_2, gdhA; glutamate dehydrogenase (NAD(P)+) [EC:1.4.1.3]	At5g07440	gb|AAK62421.1|	DHE2_ARATH, RecName: Full=Glutamate dehydrogenase 2; Short=GDH 2; EC=1.4.1.3;	Q94F14_ARATH, SubName: Full=Glutamate dehydrogenase 2 {ECO:0000313|EMBL:AAK62421.1};
TRINITY_DN91654_c0_g1	1058.48	55.7831	4.24	1.28e-44	8.39e-43	up	--	--	--	--	--	--
TRINITY_DN179155_c0_g1	27.841	472.21	-4.09	1.49e-44	9.76e-43	down	--	--	--	--	--	--
TRINITY_DN87056_c0_g2	31.1478	802.789	-4.68	1.63e-44	1.07e-42	down	GO:0002253,activation of immune response; GO:0006952,defense response; GO:0009607,response to biotic stimulus	K10745: RNASEH2C; ribonuclease H2 subunit C	At1g70880	gb|KVI05459.1|	KIRO_ACTDE, RecName: Full=Kirola {ECO:0000303|PubMed:21309790}; AltName: Allergen=Act d 11 {ECO:0000303|PubMed:21309790};	A0A103YAD3_CYNCS, SubName: Full=Bet v I domain-containing protein {ECO:0000313|EMBL:KVI05459.1};
TRINITY_DN98650_c6_g1	427.217	50.9422	3.06	2.25e-44	1.47e-42	up	GO:0016491,oxidoreductase activity	K17744: GalDH; L-galactose dehydrogenase [EC:1.1.1.316]	At1g60690	gb|PLY99647.1|	IN22_MAIZE, RecName: Full=IN2-2 protein;	A0A251TCL9_HELAN, SubName: Full=Putative aldo/keto reductase/potassium channel subunit beta {ECO:0000313|EMBL:OTG08402.1};
TRINITY_DN91625_c0_g1	7674.18	856.781	3.16	2.39e-44	1.56e-42	up	GO:0005739,mitochondrion; GO:0005774,vacuolar membrane; GO:0005524,ATP binding; GO:0050897,cobalt ion binding; GO:0005507,copper ion binding; GO:0004352,glutamate dehydrogenase (NAD+) activity; GO:0004353,glutamate dehydrogenase [NAD(P)+] activity; GO:0008270,zinc ion binding; GO:0006520,cellular amino acid metabolic process; GO:0046686,response to cadmium ion; GO:0009651,response to salt stress	K00261: GLUD1_2, gdhA; glutamate dehydrogenase (NAD(P)+) [EC:1.4.1.3]	At5g07440	gb|KVI04507.1|	DHE2_ARATH, RecName: Full=Glutamate dehydrogenase 2; Short=GDH 2; EC=1.4.1.3;	A0A103Y8K3_CYNCS, RecName: Full=Glutamate dehydrogenase {ECO:0000256|PIRNR:PIRNR000185};
TRINITY_DN99388_c5_g3	151.82	468.402	-1.63	2.54e-44	1.66e-42	down	--	--	--	--	--	--
TRINITY_DN96670_c8_g1	32.2703	445.226	-3.78	2.81e-44	1.83e-42	down	GO:0005783,endoplasmic reticulum; GO:0016020,membrane; GO:0004029,aldehyde dehydrogenase (NAD) activity; GO:0004030,aldehyde dehydrogenase [NAD(P)+] activity; GO:0006081,cellular aldehyde metabolic process	K00128: ALDH; aldehyde dehydrogenase (NAD+) [EC:1.2.1.3]	At4g36250	ref|XP_021973417.1|	AL3F1_ARATH, RecName: Full=Aldehyde dehydrogenase family 3 member F1; EC=1.2.1.3;	A0A251UBW2_HELAN, RecName: Full=Aldehyde dehydrogenase {ECO:0000256|PIRNR:PIRNR036492};
TRINITY_DN107829_c2_g6	10.8936	5854.28	-9.08	2.93e-44	1.91e-42	down	--	--	--	--	--	--
TRINITY_DN97977_c1_g2	689.505	8876.41	-3.69	3e-44	1.95e-42	down	GO:0005618,cell wall; GO:0005576,extracellular region; GO:0016020,membrane; GO:0009664,plant-type cell wall organization; GO:0006949,syncytium formation	--	At2g40610	gb|AAF35901.1|	EXPA8_ARATH, RecName: Full=Expansin-A8; Short=AtEXPA8; AltName: Full=Alpha-expansin-8; Short=At-EXP8; Short=AtEx8; AltName: Full=Ath-ExpAlpha-1.11; Flags: Precursor;	Q9LLB2_ZINVI, SubName: Full=Expansin 2 {ECO:0000313|EMBL:AAF35901.1};
TRINITY_DN96820_c0_g3	370.496	1643.23	-2.15	3.2e-44	2.08e-42	down	GO:0009507,chloroplast; GO:0009570,chloroplast stroma; GO:0047769,arogenate dehydratase activity; GO:0009094,L-phenylalanine biosynthetic process	K05359: ADT, PDT; arogenate/prephenate dehydratase [EC:4.2.1.91 4.2.1.51]	At1g08250	gb|KVI09244.1|	AROD6_ARATH, RecName: Full=Arogenate dehydratase/prephenate dehydratase 6, chloroplastic; Short=AtADT6; Short=AtPDT6; EC=4.2.1.51; EC=4.2.1.91; Flags: Precursor;	A0A103YHL0_CYNCS, RecName: Full=Arogenate dehydratase {ECO:0000256|RuleBase:RU363004}; EC=4.2.1.91 {ECO:0000256|RuleBase:RU363004};
TRINITY_DN106603_c5_g2	576.554	67.2395	3.1	3.71e-44	2.41e-42	up	GO:0009507,chloroplast; GO:0009941,chloroplast envelope; GO:0009706,chloroplast inner membrane; GO:0005886,plasma membrane; GO:0016491,oxidoreductase activity; GO:0015031,protein transport	--	At4g11410	ref|XP_021969158.1|	TIC32_ARATH, RecName: Full=Short-chain dehydrogenase TIC 32, chloroplastic; EC=1.1.1.-; AltName: Full=Translocon at the inner envelope membrane of chloroplasts 32; Short=AtTIC32;	A0A251UF01_HELAN, SubName: Full=Putative glucose/ribitol dehydrogenase {ECO:0000313|EMBL:OTG21930.1};
TRINITY_DN99007_c1_g2	16.5089	234.4	-3.84	3.86e-44	2.5e-42	down	--	--	--	--	--	--
TRINITY_DN108382_c1_g1	164.795	1040.87	-2.66	4.49e-44	2.9e-42	down	GO:0004805,trehalose-phosphatase activity; GO:0005992,trehalose biosynthetic process	K01087: otsB; trehalose 6-phosphate phosphatase [EC:3.1.3.12]	At1g78090	gb|OTG00019.1|	TPP8_ORYSJ, RecName: Full=Probable trehalose-phosphate phosphatase 8; Short=OsTPP8; EC=3.1.3.12; AltName: Full=Trehalose 6-phosphate phosphatase;	A0A251SN27_HELAN, RecName: Full=Trehalose 6-phosphate phosphatase {ECO:0000256|RuleBase:RU361117}; EC=3.1.3.12 {ECO:0000256|RuleBase:RU361117};
TRINITY_DN99931_c1_g1	6.14297	287.368	-5.56	4.55e-44	2.94e-42	down	GO:0016021,integral component of membrane; GO:0005886,plasma membrane; GO:0015171,amino acid transmembrane transporter activity; GO:0003333,amino acid transmembrane transport	K15015: SLC32A, VGAT; solute carrier family 32 (vesicular inhibitory amino acid transporter)	At1g71680	gb|KVI02360.1|	LHTL5_ARATH, RecName: Full=Lysine histidine transporter-like 5;	A0A103Y4H4_CYNCS, SubName: Full=Amino acid transporter, transmembrane {ECO:0000313|EMBL:KVI02360.1};
TRINITY_DN99130_c1_g6	37.1272	499.974	-3.75	4.81e-44	3.1e-42	down	GO:0005829,cytosol; GO:0005886,plasma membrane; GO:0009904,chloroplast accumulation movement; GO:0009903,chloroplast avoidance movement	--	At2g26570	gb|KVH99437.1|	WEB1_ARATH, RecName: Full=Protein WEAK CHLOROPLAST MOVEMENT UNDER BLUE LIGHT 1; Short=Protein WEB1;	A0A103XYU7_CYNCS, SubName: Full=Uncharacterized protein {ECO:0000313|EMBL:KVH99437.1};
TRINITY_DN107714_c1_g2	2290.77	377.936	2.6	5.98e-44	3.85e-42	up	GO:0005618,cell wall; GO:0005576,extracellular region; GO:0045330,aspartyl esterase activity; GO:0030599,pectinesterase activity; GO:0042545,cell wall modification; GO:0045490,pectin catabolic process	K01051: E3.1.1.11; pectinesterase [EC:3.1.1.11]	At3g14310	gb|PLY87160.1|	PME_DAUCA, RecName: Full=Pectinesterase; Short=PE; EC=3.1.1.11; AltName: Full=Pectin methylesterase;	A0A103GCH9_CYNCS, RecName: Full=Pectinesterase {ECO:0000256|RuleBase:RU000589}; EC=3.1.1.11 {ECO:0000256|RuleBase:RU000589};
TRINITY_DN100822_c0_g2	1671.7	17671.1	-3.4	6.16e-44	3.96e-42	down	GO:0005829,cytosol; GO:0005874,microtubule; GO:0005886,plasma membrane; GO:0005525,GTP binding; GO:0003924,GTPase activity; GO:0005200,structural constituent of cytoskeleton; GO:0007017,microtubule-based process	K07374: TUBA; tubulin alpha	At1g64740	gb|KVH90641.1|	TBA1_ARATH, RecName: Full=Tubulin alpha-1 chain;	A0A118JTX5_CYNCS, RecName: Full=Tubulin alpha chain {ECO:0000256|RuleBase:RU000352};
TRINITY_DN108309_c1_g2	3440.34	239.047	3.85	6.2e-44	3.99e-42	up	--	--	--	--	--	--
TRINITY_DN107605_c4_g2	4401.31	838.435	2.39	6.68e-44	4.29e-42	up	--	--	--	--	--	--
TRINITY_DN99092_c4_g2	165.197	858.672	-2.38	7.15e-44	4.58e-42	down	GO:0008422,beta-glucosidase activity; GO:0102483,scopolin beta-glucosidase activity; GO:0005975,carbohydrate metabolic process; GO:1901657,glycosyl compound metabolic process	K01188: E3.2.1.21; beta-glucosidase [EC:3.2.1.21]	At1g02850	gb|OTF93842.1|	BGL11_ARATH, RecName: Full=Beta-glucosidase 11; Short=AtBGLU11; EC=3.2.1.21; Flags: Precursor;	A0A251S5G2_HELAN, SubName: Full=Putative glycoside hydrolase family 1 {ECO:0000313|EMBL:OTF93842.1};
TRINITY_DN99536_c3_g1	180.781	2653.52	-3.88	7.29e-44	4.66e-42	down	--	--	--	--	--	--
TRINITY_DN97899_c5_g1	1069.42	468.024	1.19	1.06e-43	6.8e-42	up	GO:0008422,beta-glucosidase activity; GO:0047782,coniferin beta-glucosidase activity; GO:0102483,scopolin beta-glucosidase activity; GO:0005975,carbohydrate metabolic process; GO:1901657,glycosyl compound metabolic process	K05350: bglB; beta-glucosidase [EC:3.2.1.21]	At1g61810	ref|XP_022033608.1|	BGL45_ARATH, RecName: Full=Beta-glucosidase 45; Short=AtBGLU45; EC=3.2.1.21; Flags: Precursor;	A0A251V854_HELAN, SubName: Full=Putative glycoside hydrolase family 1 {ECO:0000313|EMBL:OTG31797.1};
TRINITY_DN104679_c0_g2	3673.81	1206.21	1.61	1.12e-43	7.12e-42	up	GO:0051087,chaperone binding; GO:0004842,ubiquitin-protein transferase activity; GO:0016567,protein ubiquitination; GO:0009737,response to abscisic acid; GO:0009651,response to salt stress; GO:0009266,response to temperature stimulus	K09561: STUB1, CHIP; STIP1 homology and U-box containing protein 1 [EC:2.3.2.27]	At3g07370	gb|PLY70868.1|	CHIP_ARATH, RecName: Full=E3 ubiquitin-protein ligase CHIP {ECO:0000305}; EC=2.3.2.27 {ECO:0000269|PubMed:16640601, ECO:0000269|PubMed:17241447}; AltName: Full=Carboxyl terminus of HSC70-interacting protein {ECO:0000303|PubMed:12805616}; Short=AtCHIP {ECO:0000303|PubMed:12805616}; AltName: Full=Plant U-box protein 61; AltName: Full=RING-type E3 ubiquitin transferase CHIP {ECO:0000305}; AltName: F…	A0A103XNW2_CYNCS, SubName: Full=Tetratricopeptide-like helical {ECO:0000313|EMBL:KVH94202.1};
TRINITY_DN103878_c5_g1	341.521	68.793	2.31	1.2e-43	7.66e-42	up	GO:0016021,integral component of membrane; GO:0005886,plasma membrane; GO:0005516,calmodulin binding; GO:0006952,defense response; GO:0009607,response to biotic stimulus	--	At2g17480	ref|XP_022012854.1|	MLO8_ARATH, RecName: Full=MLO-like protein 8; Short=AtMlo8;	A0A251SB15_HELAN, RecName: Full=MLO-like protein {ECO:0000256|RuleBase:RU280816};
TRINITY_DN97016_c2_g1	178.652	470.868	-1.4	1.23e-43	7.81e-42	down	GO:0009507,chloroplast; GO:0005739,mitochondrion; GO:0004813,alanine-tRNA ligase activity; GO:0016597,amino acid binding; GO:0005524,ATP binding; GO:0046872,metal ion binding; GO:0000049,tRNA binding; GO:0006419,alanyl-tRNA aminoacylation; GO:0006400,tRNA modification	K01872: AARS, alaS; alanyl-tRNA synthetase [EC:6.1.1.7]	YOR335c	ref|XP_022025944.1|	SYAP_POPTR, RecName: Full=Alanine--tRNA ligase, chloroplastic/mitochondrial {ECO:0000255|HAMAP-Rule:MF_03134}; EC=6.1.1.7 {ECO:0000255|HAMAP-Rule:MF_03134}; AltName: Full=Alanyl-tRNA synthetase {ECO:0000255|HAMAP-Rule:MF_03134}; Short=AlaRS {ECO:0000255|HAMAP-Rule:MF_03134}; Flags: Precursor;	A0A251RWE3_HELAN, RecName: Full=Probable alanine--tRNA ligase, chloroplastic {ECO:0000256|HAMAP-Rule:MF_03134}; EC=6.1.1.7 {ECO:0000256|HAMAP-Rule:MF_03134}; AltName: Full=Alanyl-tRNA synthetase {ECO:0000256|HAMAP-Rule:MF_03134}; Short=AlaRS {ECO:0000256|HAMAP-Rule:MF_03134};
TRINITY_DN100481_c0_g4	3640.24	373.61	3.28	1.37e-43	8.71e-42	up	GO:0004427,inorganic diphosphatase activity; GO:0046872,metal ion binding; GO:0052731,phosphocholine phosphatase activity; GO:0052732,phosphoethanolamine phosphatase activity; GO:0051262,protein tetramerization	K13248: PHOSPHO2; pyridoxal phosphate phosphatase PHOSPHO2 [EC:3.1.3.74]	At1g17710	gb|KVI05877.1|	PPSP2_ARATH, RecName: Full=Inorganic pyrophosphatase 2; Short=AtPPsPase2; Short=PPi phosphatase 2; Short=Pyrophosphate-specific phosphatase 2; EC=3.6.1.1;	A0A103YB84_CYNCS, SubName: Full=HAD-like domain-containing protein {ECO:0000313|EMBL:KVI05877.1};
TRINITY_DN106237_c1_g4	6056.85	1124.89	2.43	1.55e-43	9.83e-42	up	--	--	--	--	--	--
TRINITY_DN94925_c7_g1	3524.74	316.236	3.48	1.9e-43	1.21e-41	up	--	--	At2g15760	gb|KVI06632.1|	--	A0A124SGJ8_CYNCS, SubName: Full=Uncharacterized protein {ECO:0000313|EMBL:KVI06632.1};
TRINITY_DN86895_c0_g1	26.4283	353.366	-3.74	2.08e-43	1.32e-41	down	GO:0005615,extracellular space; GO:0004185,serine-type carboxypeptidase activity; GO:0009742,brassinosteroid mediated signaling pathway; GO:0051603,proteolysis involved in cellular protein catabolic process	--	At3g02110	gb|PLY80080.1|	SCP25_ARATH, RecName: Full=Serine carboxypeptidase-like 25; EC=3.4.16.-; Flags: Precursor;	A0A251RQ90_HELAN, RecName: Full=Carboxypeptidase {ECO:0000256|RuleBase:RU361156}; EC=3.4.16.- {ECO:0000256|RuleBase:RU361156};
TRINITY_DN106961_c4_g1	9466.18	3669.07	1.37	2.28e-43	1.44e-41	up	GO:0005739,mitochondrion; GO:0052656,L-isoleucine transaminase activity; GO:0052654,L-leucine transaminase activity; GO:0052655,L-valine transaminase activity; GO:0009097,isoleucine biosynthetic process; GO:0009098,leucine biosynthetic process; GO:0009099,valine biosynthetic process	K00826: E2.6.1.42, ilvE; branched-chain amino acid aminotransferase [EC:2.6.1.42]	At1g10070	gb|KVH88184.1|	BCAT1_HUMLU, RecName: Full=Branched-chain amino acid aminotransferase 1, mitochondrial {ECO:0000303|PubMed:23347725}; Short=HlBCAT1 {ECO:0000303|PubMed:23347725}; EC=2.6.1.42 {ECO:0000269|PubMed:23347725}; Flags: Precursor;	A0A103XCH9_CYNCS, RecName: Full=Branched-chain-amino-acid aminotransferase {ECO:0000256|RuleBase:RU004517}; EC=2.6.1.42 {ECO:0000256|RuleBase:RU004517};
TRINITY_DN105025_c3_g3	3089.56	24119.6	-2.96	2.48e-43	1.56e-41	down	--	--	--	--	--	--
TRINITY_DN104762_c1_g1	949.286	157.241	2.59	2.54e-43	1.6e-41	up	--	--	At2g46150	gb|KVH90145.1|	--	A0A118JTY9_CYNCS, SubName: Full=Late embryogenesis abundant protein, LEA-14 {ECO:0000313|EMBL:KVH90145.1};
TRINITY_DN105939_c2_g5	1019.96	8886.5	-3.12	2.62e-43	1.65e-41	down	--	--	--	--	--	--
TRINITY_DN105142_c0_g3	2568.36	1054.57	1.28	2.88e-43	1.81e-41	up	GO:0005737,cytoplasm; GO:0005886,plasma membrane; GO:0070403,NAD+ binding; GO:0048040,UDP-glucuronate decarboxylase activity; GO:0042732,D-xylose metabolic process; GO:0033320,UDP-D-xylose biosynthetic process	K08678: UXS1, uxs; UDP-glucuronate decarboxylase [EC:4.1.1.35]	At2g28760	gb|KVI04930.1|	UXS6_ARATH, RecName: Full=UDP-glucuronic acid decarboxylase 6; EC=4.1.1.35; AltName: Full=UDP-XYL synthase 6; AltName: Full=UDP-glucuronate decarboxylase 6; Short=UGD; Short=UXS-6;	A0A103Y9F9_CYNCS, SubName: Full=NAD-dependent epimerase/dehydratase {ECO:0000313|EMBL:KVI04930.1};
TRINITY_DN107722_c1_g6	15921.2	2298.68	2.79	3.16e-43	1.98e-41	up	GO:0009507,chloroplast; GO:0009941,chloroplast envelope; GO:0009706,chloroplast inner membrane; GO:0009535,chloroplast thylakoid membrane; GO:0005886,plasma membrane; GO:0005773,vacuole; GO:0016491,oxidoreductase activity	--	At4g13010	gb|KVI03791.1|	QORH_ARATH, RecName: Full=Chloroplast envelope quinone oxidoreductase homolog {ECO:0000303|PubMed:20424175}; Short=ceQORH {ECO:0000303|PubMed:20424175}; EC=1.3.1.- {ECO:0000269|PubMed:26678323};	A0A103Y768_CYNCS, SubName: Full=Alcohol dehydrogenase GroES-like protein {ECO:0000313|EMBL:KVI03791.1};
TRINITY_DN105506_c4_g1	278.22	23.6645	3.56	3.64e-43	2.28e-41	up	GO:0016021,integral component of membrane; GO:0005886,plasma membrane; GO:0005524,ATP binding; GO:0004674,protein serine/threonine kinase activity	K04733: IRAK4; interleukin-1 receptor-associated kinase 4 [EC:2.7.11.1]	At1g56120	gb|KVI08657.1|	Y5614_ARATH, RecName: Full=Probable LRR receptor-like serine/threonine-protein kinase At1g56140; EC=2.7.11.1; Flags: Precursor;	A0A124SH75_CYNCS, SubName: Full=Concanavalin A-like lectin/glucanase, subgroup {ECO:0000313|EMBL:KVI08657.1};
TRINITY_DN101424_c5_g2	121.902	643.08	-2.4	3.67e-43	2.3e-41	down	--	--	--	gb|PLY76321.1|	--	--
TRINITY_DN96885_c0_g1	46.8656	354.29	-2.91	3.75e-43	2.34e-41	down	GO:0009707,chloroplast outer membrane; GO:0046509,1,2-diacylglycerol 3-beta-galactosyltransferase activity; GO:0016036,cellular response to phosphate starvation; GO:0006631,fatty acid metabolic process; GO:0019374,galactolipid metabolic process; GO:0009247,glycolipid biosynthetic process	K03715: MGD; 1,2-diacylglycerol 3-beta-galactosyltransferase [EC:2.4.1.46]	At2g11810	gb|KVI11690.1|	MGDG3_ARATH, RecName: Full=Monogalactosyldiacylglycerol synthase 3, chloroplastic; Short=AtMGD3; EC=2.4.1.46; AltName: Full=MGDG synthase type C; Flags: Precursor;	A0A103YM37_CYNCS, SubName: Full=Diacylglycerol glucosyltransferase, N-terminal {ECO:0000313|EMBL:KVI11690.1}; Flags: Fragment;
TRINITY_DN105984_c0_g1	12097.2	357.211	5.08	4e-43	2.5e-41	up	--	--	--	--	--	--
TRINITY_DN102302_c0_g1	552.255	68.2828	3.01	4.5e-43	2.8e-41	up	GO:0005576,extracellular region; GO:0003993,acid phosphatase activity; GO:0046872,metal ion binding	--	At1g13750	gb|PLY83297.1|	PPA27_ARATH, RecName: Full=Probable inactive purple acid phosphatase 27; Flags: Precursor;	A0A1U7WIB4_NICSY, RecName: Full=Purple acid phosphatase {ECO:0000256|RuleBase:RU361203}; EC=3.1.3.2 {ECO:0000256|RuleBase:RU361203};
TRINITY_DN107566_c1_g3	958.167	33.7743	4.83	6.01e-43	3.74e-41	up	GO:0048046,apoplast; GO:0005618,cell wall; GO:0005794,Golgi apparatus; GO:0009505,plant-type cell wall; GO:0005886,plasma membrane; GO:0009506,plasmodesma; GO:0030246,carbohydrate binding; GO:0009735,response to cytokinin	--	At1g78830	ref|XP_017618579.1|	EP1L2_ARATH, RecName: Full=EP1-like glycoprotein 2 {ECO:0000305}; AltName: Full=Curculin-like (Mannose-binding) lectin family protein {ECO:0000303|PubMed:23738689}; Flags: Precursor;	A0A0D2W712_GOSRA, SubName: Full=Uncharacterized protein {ECO:0000313|EMBL:KJB82055.1};
TRINITY_DN96587_c1_g1	444.304	113.302	1.97	6.02e-43	3.75e-41	up	GO:0046658,anchored component of plasma membrane; GO:0005618,cell wall; GO:0005737,cytoplasm; GO:0005576,extracellular region; GO:0005634,nucleus; GO:0042973,glucan endo-1,3-beta-D-glucosidase activity; GO:0004553,hydrolase activity, hydrolyzing O-glycosyl compounds; GO:0030247,polysaccharide binding; GO:0005975,carbohydrate metabolic process; GO:0071555,cell wall organization; GO:0006952,defense…	K19891: GN1_2_3; glucan endo-1,3-beta-glucosidase 1/2/3 [EC:3.2.1.39]	At2g27500	gb|KVI00072.1|	E1314_ARATH, RecName: Full=Glucan endo-1,3-beta-glucosidase 14; EC=3.2.1.39; AltName: Full=(1->3)-beta-glucan endohydrolase 14; Short=(1->3)-beta-glucanase 14; AltName: Full=Beta-1,3-endoglucanase 14; Short=Beta-1,3-glucanase 14; Flags: Precursor;	A0A103Y037_CYNCS, SubName: Full=Glycoside hydrolase, catalytic domain-containing protein {ECO:0000313|EMBL:KVI00072.1};
TRINITY_DN102451_c3_g1	2096.19	5899.3	-1.49	6.07e-43	3.77e-41	down	GO:0004869,cysteine-type endopeptidase inhibitor activity	K13899: CST3; cystatin-C	At2g31980	gb|KVH90918.1|	CYTB_HELAN, RecName: Full=Cysteine proteinase inhibitor B; AltName: Full=Cystatin-B; AltName: Full=SCB;	A0A103XHN8_CYNCS, RecName: Full=Cysteine proteinase inhibitor {ECO:0000256|RuleBase:RU362130};
TRINITY_DN88797_c0_g1	1925.78	29.8123	6.02	8.68e-43	5.38e-41	up	--	--	--	gb|PLY92924.1|	--	A0A251TC67_HELAN, SubName: Full=Uncharacterized protein {ECO:0000313|EMBL:OTG07531.1};
TRINITY_DN100702_c5_g4	8.63031	3346.38	-8.62	9.04e-43	5.6e-41	down	GO:0008289,lipid binding; GO:0006869,lipid transport	--	At2g38540	gb|KVH95031.1|	NLTP_HELAN, RecName: Full=Non-specific lipid-transfer protein; Short=LTP; Short=NsLTP; AltName: Full=SDI-9; Flags: Precursor;	A0A103XQG9_CYNCS, RecName: Full=Non-specific lipid-transfer protein {ECO:0000256|RuleBase:RU000628};
TRINITY_DN105717_c3_g1	678.485	6.03854	6.81	9.34e-43	5.78e-41	up	GO:0048046,apoplast; GO:0005507,copper ion binding; GO:0052716,hydroquinone:oxygen oxidoreductase activity; GO:0016722,oxidoreductase activity, oxidizing metal ions; GO:0046274,lignin catabolic process	--	At3g09220	gb|KVH94846.1|	LAC7_ARATH, RecName: Full=Laccase-7; EC=1.10.3.2; AltName: Full=Benzenediol:oxygen oxidoreductase 7; AltName: Full=Diphenol oxidase 7; AltName: Full=Urishiol oxidase 7; Flags: Precursor;	A0A103XQ48_CYNCS, RecName: Full=Laccase {ECO:0000256|RuleBase:RU361119}; EC=1.10.3.2 {ECO:0000256|RuleBase:RU361119}; AltName: Full=Benzenediol:oxygen oxidoreductase {ECO:0000256|RuleBase:RU361119}; AltName: Full=Diphenol oxidase {ECO:0000256|RuleBase:RU361119}; AltName: Full=Urishiol oxidase {ECO:0000256|RuleBase:RU361119};
TRINITY_DN101499_c1_g2	470.402	1173.77	-1.32	1.13e-42	6.97e-41	down	GO:0005886,plasma membrane; GO:0046872,metal ion binding; GO:0004842,ubiquitin-protein transferase activity; GO:1901527,abscisic acid-activated signaling pathway involved in stomatal movement; GO:0080144,amino acid homeostasis; GO:0009737,response to abscisic acid	K10604: MGRN1; E3 ubiquitin-protein ligase MGRN1 [EC:2.3.2.27]	At3g09770	gb|KVH90452.1|	LOFG2_ARATH, RecName: Full=Probable E3 ubiquitin-protein ligase LOG2; EC=2.3.2.27; AltName: Full=Probable RING-type E3 ubiquitin transferase LOG2 {ECO:0000305}; AltName: Full=Protein LOSS OF GDU2; AltName: Full=RING finger protein 215;	A0A103XGV6_CYNCS, SubName: Full=Zinc finger, RING/FYVE/PHD-type {ECO:0000313|EMBL:KVH90452.1};
TRINITY_DN96106_c0_g1	1632.38	164.556	3.31	1.26e-42	7.8e-41	up	GO:0016021,integral component of membrane; GO:0005886,plasma membrane; GO:0015171,amino acid transmembrane transporter activity; GO:0003333,amino acid transmembrane transport	K14209: SLC36A, PAT; solute carrier family 36 (proton-coupled amino acid transporter)	At1g48640_2	ref|XP_022025324.1|	LHTL1_ARATH, RecName: Full=Lysine histidine transporter-like 1;	A0A251RPU9_HELAN, SubName: Full=Putative lysine histidine transporter 1 {ECO:0000313|EMBL:OTF86327.1};
TRINITY_DN98679_c1_g3	891.426	12981.7	-3.86	1.42e-42	8.73e-41	down	--	--	--	--	--	--
TRINITY_DN96730_c4_g1	372.366	80.7302	2.21	1.5e-42	9.26e-41	up	GO:0005524,ATP binding; GO:0004674,protein serine/threonine kinase activity	--	At3g04810	gb|OTG36323.1|	NEK2_ORYSJ, RecName: Full=Serine/threonine-protein kinase Nek2 {ECO:0000305}; EC=2.7.11.1 {ECO:0000305}; AltName: Full=NimA-related protein kinase 2 {ECO:0000303|PubMed:17886359}; AltName: Full=OsNek2 {ECO:0000303|PubMed:17886359};	A0A251VME9_HELAN, SubName: Full=Putative serine/threonine-protein kinase pim-1/2/3 {ECO:0000313|EMBL:OTG36323.1};
TRINITY_DN100316_c1_g2	2.237	475.639	-7.73	1.59e-42	9.74e-41	down	GO:0016324,apical plasma membrane; GO:0005829,cytosol; GO:0005886,plasma membrane; GO:0090406,pollen tube; GO:0016308,1-phosphatidylinositol-4-phosphate 5-kinase activity; GO:0005524,ATP binding; GO:0006897,endocytosis; GO:0007164,establishment of tissue polarity; GO:0046488,phosphatidylinositol metabolic process; GO:0009827,plant-type cell wall modification; GO:0009846,pollen germination; GO:000…	K00889: PIP5K; 1-phosphatidylinositol-4-phosphate 5-kinase [EC:2.7.1.68]	At3g56960	gb|KVI03447.1|	PI5K4_ARATH, RecName: Full=Phosphatidylinositol 4-phosphate 5-kinase 4; Short=AtPIP5K4; EC=2.7.1.68; AltName: Full=1-phosphatidylinositol 4-phosphate kinase 4; AltName: Full=Diphosphoinositide kinase 4; AltName: Full=PtdIns(4)P-5-kinase 4;	A0A103Y6K1_CYNCS, RecName: Full=Phosphatidylinositol 4-phosphate 5-kinase {ECO:0000256|PIRNR:PIRNR037274}; EC=2.7.1.68 {ECO:0000256|PIRNR:PIRNR037274};
TRINITY_DN107282_c4_g1	639.757	18.4182	5.12	1.79e-42	1.1e-40	up	GO:0006952,defense response; GO:0009607,response to biotic stimulus	--	--	gb|KVH96487.1|	RAP_TAROF, RecName: Full=Root allergen protein; Short=RAP;	A0A118JXN8_CYNCS, SubName: Full=Bet v I domain-containing protein {ECO:0000313|EMBL:KVH96487.1};
TRINITY_DN101693_c1_g2	443.278	1424.24	-1.68	1.99e-42	1.22e-40	down	GO:0005886,plasma membrane; GO:0005524,ATP binding; GO:0004674,protein serine/threonine kinase activity	K03083: GSK3B; glycogen synthase kinase 3 beta [EC:2.7.11.26]	At1g09840	ref|XP_021988883.1|	KSG10_ARATH, RecName: Full=Shaggy-related protein kinase kappa; Short=AtHIR1; EC=2.7.11.1; AltName: Full=ASK-kappa; Short=AtK-1; AltName: Full=Shaggy-related protein kinase 41; Short=AtSK41;	A0A251TL84_HELAN, SubName: Full=Putative glycogen synthase kinase {ECO:0000313|EMBL:OTG11513.1};
TRINITY_DN106078_c3_g1	1036.09	185.355	2.48	1.99e-42	1.22e-40	up	GO:0035251,UDP-glucosyltransferase activity; GO:0008152,metabolic process	K00699: UGT; glucuronosyltransferase [EC:2.4.1.17]	At5g05870	ref|XP_022006347.1|	U76G1_STERE, RecName: Full=UDP-glycosyltransferase 76G1 {ECO:0000303|PubMed:15610349}; EC=2.4.1.- {ECO:0000305};	A0A251SQ17_HELAN, SubName: Full=Putative UDP-glucuronosyl/UDP-glucosyltransferase {ECO:0000313|EMBL:OTF99620.1};
TRINITY_DN99885_c2_g1	51.462	449.606	-3.13	2.72e-42	1.66e-40	down	GO:0005905,clathrin-coated pit; GO:0030136,clathrin-coated vesicle; GO:0005794,Golgi apparatus; GO:0005545,1-phosphatidylinositol binding; GO:0030276,clathrin binding; GO:0048268,clathrin coat assembly; GO:0006897,endocytosis	--	At1g25240	gb|KVH97511.1|	CAP13_ARATH, RecName: Full=Putative clathrin assembly protein At1g25240;	A0A118JXU0_CYNCS, SubName: Full=Uncharacterized protein {ECO:0000313|EMBL:KVH97511.1};
TRINITY_DN83412_c0_g1	388.569	839.655	-1.11	3.28e-42	2e-40	down	--	--	--	gb|KVI00534.1|	--	A0A103Y104_CYNCS, SubName: Full=Uncharacterized protein {ECO:0000313|EMBL:KVI00534.1};
TRINITY_DN107714_c2_g2	1116.28	107.27	3.38	3.64e-42	2.22e-40	up	GO:0005618,cell wall; GO:0005576,extracellular region; GO:0045330,aspartyl esterase activity; GO:0004857,enzyme inhibitor activity; GO:0030599,pectinesterase activity; GO:0042545,cell wall modification; GO:0045490,pectin catabolic process	K01051: E3.1.1.11; pectinesterase [EC:3.1.1.11]	At3g14310	gb|PLY87160.1|	PME3_CITSI, RecName: Full=Pectinesterase 3; Short=PE 3; EC=3.1.1.11; AltName: Full=Pectin methylesterase 3; Flags: Precursor;	A0A251SZG6_HELAN, RecName: Full=Pectinesterase {ECO:0000256|RuleBase:RU000589}; EC=3.1.1.11 {ECO:0000256|RuleBase:RU000589};
TRINITY_DN91853_c1_g2	66.3725	400.94	-2.6	4.92e-42	2.99e-40	down	GO:0009543,chloroplast thylakoid lumen; GO:0004601,peroxidase activity; GO:0051920,peroxiredoxin activity; GO:0045454,cell redox homeostasis	--	At3g26060	ref|XP_004287666.1|	PRXQ_GENTR, RecName: Full=Peroxiredoxin Q, chloroplastic; EC=1.11.1.15; AltName: Full=Thioredoxin peroxidase; Flags: Precursor;	A0A251T1F4_HELAN, SubName: Full=Putative peroxiredoxin Q protein {ECO:0000313|EMBL:OTG03701.1};
TRINITY_DN100451_c2_g3	668.453	221.889	1.59	5.33e-42	3.24e-40	up	--	--	--	--	--	G4ZQE4_PHYSP, RecName: Full=Carboxylic ester hydrolase {ECO:0000256|RuleBase:RU361235}; EC=3.1.1.- {ECO:0000256|RuleBase:RU361235};
TRINITY_DN98056_c1_g4	112.577	407.987	-1.86	6.19e-42	3.75e-40	down	--	--	At2g36840	gb|KVH90412.1|	ACR10_ARATH, RecName: Full=ACT domain-containing protein ACR10 {ECO:0000305}; AltName: Full=Protein ACT DOMAIN REPEATS 10 {ECO:0000303|PubMed:21861936};	A0A118JTT4_CYNCS, SubName: Full=Uncharacterized protein {ECO:0000313|EMBL:KVH90412.1};
TRINITY_DN98671_c8_g1	987.239	400.31	1.3	6.28e-42	3.81e-40	up	GO:0008422,beta-glucosidase activity; GO:0047782,coniferin beta-glucosidase activity; GO:0102483,scopolin beta-glucosidase activity; GO:0005975,carbohydrate metabolic process; GO:1901657,glycosyl compound metabolic process; GO:0009809,lignin biosynthetic process	K05350: bglB; beta-glucosidase [EC:3.2.1.21]	At1g61820	ref|XP_022033608.1|	BGL46_ARATH, RecName: Full=Beta-glucosidase 46; Short=AtBGLU46; EC=3.2.1.21; Flags: Precursor;	A0A251UVZ4_HELAN, SubName: Full=Putative glycoside hydrolase family 1 {ECO:0000313|EMBL:OTG27016.1};
TRINITY_DN108230_c4_g1	683.468	150.838	2.18	6.66e-42	4.03e-40	up	GO:0016021,integral component of membrane; GO:0016020,membrane; GO:0005886,plasma membrane; GO:0005524,ATP binding; GO:0008553,proton-exporting ATPase activity, phosphorylative mechanism; GO:0046872,metal ion binding; GO:0006754,ATP biosynthetic process	K01535: PMA1, PMA2; H+-transporting ATPase [EC:3.6.3.6]	At2g07560	gb|OTG12335.1|	PMA6_ARATH, RecName: Full=ATPase 6, plasma membrane-type; EC=3.6.3.6; AltName: Full=Proton pump 6;	A0A251TMI4_HELAN, RecName: Full=Plasma membrane ATPase {ECO:0000256|RuleBase:RU362083}; EC=3.6.3.6 {ECO:0000256|RuleBase:RU362083};
TRINITY_DN103205_c1_g1	21.2625	235.296	-3.47	7.23e-42	4.37e-40	down	GO:0030659,cytoplasmic vesicle membrane; GO:0012505,endomembrane system; GO:0010008,endosome membrane; GO:0016021,integral component of membrane; GO:0005774,vacuolar membrane; GO:0005773,vacuole; GO:0015297,antiporter activity; GO:0008324,cation transmembrane transporter activity; GO:0005384,manganese ion transmembrane transporter activity; GO:0015079,potassium ion transmembrane transporter activ…	--	At3g14070_2	gb|KVI12241.1|	CCX3_ARATH, RecName: Full=Cation/calcium exchanger 3; Short=AtCCX3; AltName: Full=Protein CATION CALCIUM EXCHANGER 3; AltName: Full=Protein CATION EXCHANGER 9;	A0A118K7I3_CYNCS, SubName: Full=Sodium/calcium exchanger membrane region {ECO:0000313|EMBL:KVI12241.1};
TRINITY_DN96719_c0_g2	1.64679	802.276	-8.97	9.27e-42	5.6e-40	down	--	--	--	gb|KVI10699.1|	--	A0A103YK91_CYNCS, SubName: Full=Gamma thionin {ECO:0000313|EMBL:KVI10699.1};
TRINITY_DN108261_c0_g1	22929.8	9609.55	1.25	9.53e-42	5.75e-40	up	GO:0004066,asparagine synthase (glutamine-hydrolyzing) activity; GO:0005524,ATP binding; GO:0006541,glutamine metabolic process; GO:0070981,L-asparagine biosynthetic process	K01953: asnB, ASNS; asparagine synthase (glutamine-hydrolysing) [EC:6.3.5.4]	At3g47340	gb|PLY81166.1|	ASNS_ASPOF, RecName: Full=Asparagine synthetase [glutamine-hydrolyzing]; Short=AS; EC=6.3.5.4;	G3G8K0_VITVI, SubName: Full=Asparagine synthetase 1 {ECO:0000313|EMBL:AEO72339.1};
TRINITY_DN97032_c0_g3	73.1007	499.549	-2.77	9.84e-42	5.92e-40	down	--	--	--	--	--	--
TRINITY_DN97672_c2_g4	14.4634	203.011	-3.81	9.94e-42	5.98e-40	down	GO:0005737,cytoplasm; GO:0005634,nucleus; GO:0005509,calcium ion binding; GO:0009409,response to cold; GO:0048767,root hair elongation	K13448: CML; calcium-binding protein CML	At1g24620	gb|KVH96218.1|	CML25_ARATH, RecName: Full=Probable calcium-binding protein CML25; AltName: Full=Calmodulin-like protein 25;	A0A103XST1_CYNCS, SubName: Full=Calcium-binding EF-hand {ECO:0000313|EMBL:KVH96218.1};
TRINITY_DN96861_c0_g4	789.721	184.325	2.1	1.06e-41	6.35e-40	up	GO:0016021,integral component of membrane	--	--	gb|POE71915.1|	RC22_ARATH, RecName: Full=UPF0057 membrane protein At2g24040;	A0A087GIE1_ARAAL, SubName: Full=Uncharacterized protein {ECO:0000313|EMBL:KFK29643.1};
TRINITY_DN104064_c2_g1	35.7814	295.163	-3.05	1.26e-41	7.58e-40	down	--	--	At5g53750	gb|PLY98083.1|	CBSX5_ARATH, RecName: Full=CBS domain-containing protein CBSX5;	A0A118JTB1_CYNCS, SubName: Full=Uncharacterized protein {ECO:0000313|EMBL:KVH89547.1};
TRINITY_DN107388_c1_g5	367.435	46.2652	2.99	1.44e-41	8.65e-40	up	--	--	--	--	--	--
TRINITY_DN101991_c1_g1	2154.47	5253.94	-1.29	1.51e-41	9.02e-40	down	GO:0005887,integral component of plasma membrane; GO:0016020,membrane; GO:0005886,plasma membrane; GO:0015250,water channel activity; GO:0034220,ion transmembrane transport; GO:0009414,response to water deprivation; GO:0006833,water transport	--	At4g00430	gb|KVH90094.1|	PIP14_ARATH, RecName: Full=Probable aquaporin PIP1-4; AltName: Full=Plasma membrane intrinsic protein 1-4; Short=AtPIP1;4; AltName: Full=Transmembrane protein C; Short=TMP-C;	A0A103XG07_CYNCS, SubName: Full=Aquaporin-like protein {ECO:0000313|EMBL:KVH90094.1};
TRINITY_DN101069_c1_g8	401.787	74.4901	2.43	1.51e-41	9.05e-40	up	--	--	--	--	--	--
TRINITY_DN98890_c3_g1	553.481	25.0058	4.47	1.52e-41	9.1e-40	up	--	--	At3g48050	gb|KVI09091.1|	--	A0A118K5H0_CYNCS, SubName: Full=Bromo adjacent homology (BAH) domain-containing protein {ECO:0000313|EMBL:KVI09091.1};
TRINITY_DN101265_c3_g1	646.922	9.87689	6.05	1.9e-41	1.13e-39	up	--	--	--	ref|XP_016481061.1|	--	A0A1S4AWR7_TOBAC, SubName: Full=uncharacterized protein LOC107802129 {ECO:0000313|RefSeq:XP_016481061.1};
TRINITY_DN106583_c0_g2	89.1098	530.159	-2.57	1.95e-41	1.16e-39	down	GO:0020037,heme binding; GO:0005506,iron ion binding; GO:0004497,monooxygenase activity; GO:0016705,oxidoreductase activity, acting on paired donors, with incorporation or reduction of molecular oxygen	--	At5g04660	gb|KVI07489.1|	C77A2_SOLME, RecName: Full=Cytochrome P450 77A2; EC=1.14.-.-; AltName: Full=CYPLXXVIIA2; AltName: Full=Cytochrome P-450EG5;	A0A103YE93_CYNCS, SubName: Full=Cytochrome P450 {ECO:0000313|EMBL:KVI07489.1};
TRINITY_DN95120_c6_g2	92.2774	1476.25	-4	1.97e-41	1.17e-39	down	GO:0005576,extracellular region; GO:0009505,plant-type cell wall; GO:0009506,plasmodesma; GO:0020037,heme binding; GO:0046872,metal ion binding; GO:0004601,peroxidase activity; GO:0042744,hydrogen peroxide catabolic process; GO:0009664,plant-type cell wall organization; GO:0006979,response to oxidative stress	K00430: E1.11.1.7; peroxidase [EC:1.11.1.7]	At4g33420	gb|PLY61952.1|	PER47_ARATH, RecName: Full=Peroxidase 47; Short=Atperox P47; EC=1.11.1.7; AltName: Full=ATP32; Flags: Precursor;	A0A103XF57_CYNCS, RecName: Full=Peroxidase {ECO:0000256|RuleBase:RU362060, ECO:0000256|SAAS:SAAS00709852}; EC=1.11.1.7 {ECO:0000256|RuleBase:RU362060, ECO:0000256|SAAS:SAAS00709852};
TRINITY_DN107282_c4_g5	624.986	26.9839	4.53	2.01e-41	1.2e-39	up	--	--	--	--	--	--
TRINITY_DN105385_c2_g1	291.67	773.759	-1.41	2.23e-41	1.32e-39	down	GO:0005795,Golgi stack; GO:0005770,late endosome; GO:0000326,protein storage vacuole; GO:0048316,seed development	K12472: EPS15; epidermal growth factor receptor substrate 15	At1g49320	gb|KVI10685.1|	USPL1_ARATH, RecName: Full=BURP domain protein USPL1 {ECO:0000303|PubMed:19639386}; AltName: Full=Unknown seed protein-like protein 1 {ECO:0000303|PubMed:19639386}; Short=AtUSPL1 {ECO:0000303|PubMed:19639386}; Flags: Precursor;	A0A103YK84_CYNCS, SubName: Full=BURP domain-containing protein {ECO:0000313|EMBL:KVI10685.1};
TRINITY_DN102196_c4_g1	468.141	1613.19	-1.78	2.29e-41	1.36e-39	down	--	--	At4g22320	gb|PLY71656.1|	--	A0A118K0P8_CYNCS, SubName: Full=Uncharacterized protein {ECO:0000313|EMBL:KVI01095.1};
TRINITY_DN98819_c0_g4	946.136	445.187	1.09	2.39e-41	1.42e-39	up	GO:0005634,nucleus; GO:0005516,calmodulin binding; GO:0003700,DNA binding transcription factor activity; GO:0043565,sequence-specific DNA binding; GO:0006351,transcription, DNA-templated	K13425: WRKY22; WRKY transcription factor 22	At4g24240	gb|PLY87296.1|	WRKY7_ARATH, RecName: Full=Probable WRKY transcription factor 7; AltName: Full=WRKY DNA-binding protein 7;	A0A103XKP5_CYNCS, SubName: Full=DNA-binding WRKY {ECO:0000313|EMBL:KVH92505.1};
TRINITY_DN105489_c1_g4	63.9249	400.284	-2.65	2.5e-41	1.48e-39	down	GO:0033834,kaempferol 3-O-galactosyltransferase activity; GO:0102479,quercetin 3-O-beta:-D-galactosyltransferase activity; GO:0008152,metabolic process	--	At5g17050	gb|KVI11784.1|	KGLT_PETHY, RecName: Full=Kaempferol 3-O-beta-D-galactosyltransferase; Short=F3GalTase; EC=2.4.1.234; Flags: Precursor;	A0A103YMG3_CYNCS, RecName: Full=Glycosyltransferase {ECO:0000256|RuleBase:RU362057}; EC=2.4.1.- {ECO:0000256|RuleBase:RU362057};
TRINITY_DN103131_c0_g2	1506.6	258.292	2.55	2.74e-41	1.62e-39	up	GO:0005739,mitochondrion; GO:0005524,ATP binding; GO:0050897,cobalt ion binding; GO:0005507,copper ion binding; GO:0004353,glutamate dehydrogenase [NAD(P)+] activity; GO:0008270,zinc ion binding; GO:0006520,cellular amino acid metabolic process; GO:0006807,nitrogen compound metabolic process; GO:0009646,response to absence of light; GO:0046686,response to cadmium ion; GO:0009651,response to salt …	K00261: GLUD1_2, gdhA; glutamate dehydrogenase (NAD(P)+) [EC:1.4.1.3]	At5g18170	gb|KVI08402.1|	DHE1_ARATH, RecName: Full=Glutamate dehydrogenase 1; Short=GDH 1; EC=1.4.1.3;	A0A118K536_CYNCS, RecName: Full=Glutamate dehydrogenase {ECO:0000256|PIRNR:PIRNR000185};
TRINITY_DN107684_c1_g2	98.0496	1302.91	-3.73	4.45e-41	2.63e-39	down	GO:0016021,integral component of membrane; GO:0005886,plasma membrane; GO:0031201,SNARE complex; GO:0030133,transport vesicle; GO:0005484,SNAP receptor activity; GO:0000149,SNARE binding; GO:0006887,exocytosis; GO:0006886,intracellular protein transport; GO:0009860,pollen tube growth; GO:0048278,vesicle docking; GO:0006906,vesicle fusion	K08486: STX1B_2_3; syntaxin 1B/2/3	At1g61290	gb|PLY89986.1|	SY124_ARATH, RecName: Full=Syntaxin-124; Short=AtSYP124;	A0A251RQH4_HELAN, SubName: Full=Putative t-SNARE {ECO:0000313|EMBL:OTF86758.1};
TRINITY_DN93848_c0_g1	22.7559	245.974	-3.43	5.31e-41	3.13e-39	down	GO:0005886,plasma membrane; GO:0009738,abscisic acid-activated signaling pathway; GO:1900458,negative regulation of brassinosteroid mediated signaling pathway	K22455: EBAG9; estrogen receptor-binding fragment-associated gene 9 protein	At2g41870	gb|KVI12082.1|	REM41_ORYSJ, RecName: Full=Remorin 4.1 {ECO:0000305}; Short=OsREM4.1 {ECO:0000303|PubMed:17984200}; AltName: Full=Remorin group 4 member 1 {ECO:0000303|PubMed:17984200};	A0A103YN51_CYNCS, SubName: Full=Remorin, C-terminal {ECO:0000313|EMBL:KVI12082.1};
TRINITY_DN103985_c0_g2	1998.06	795.713	1.33	6.94e-41	4.09e-39	up	GO:0005634,nucleus; GO:0004518,nuclease activity	--	At1g19660	ref|XP_021976204.1|	BBD2_ARATH, RecName: Full=Bifunctional nuclease 2; Short=AtBBD2; EC=3.1.-.-;	A0A251U4M2_HELAN, SubName: Full=Putative wound-responsive family protein {ECO:0000313|EMBL:OTG17241.1};
TRINITY_DN106304_c3_g3	117.972	416.68	-1.82	7.97e-41	4.68e-39	down	GO:0009507,chloroplast; GO:0016758,transferase activity, transferring hexosyl groups; GO:0008152,metabolic process	K21371: UGT75L6, UGTCs2; crocetin glucosyltransferase [EC:2.4.1.271]	At1g05560	gb|KVI08240.1|	UGT1_GARJA, RecName: Full=Crocetin glucosyltransferase, chloroplastic; EC=2.4.1.271; AltName: Full=UDP-glucose glucosyltransferase 1; Short=GjUGT1; AltName: Full=UDP-glycosyltransferase 75L6; Flags: Precursor;	A0A103YFP0_CYNCS, RecName: Full=Glycosyltransferase {ECO:0000256|RuleBase:RU362057}; EC=2.4.1.- {ECO:0000256|RuleBase:RU362057};
TRINITY_DN105510_c1_g2	3829.1	48281.5	-3.66	9.21e-41	5.41e-39	down	GO:0048046,apoplast; GO:0005618,cell wall; GO:0004553,hydrolase activity, hydrolyzing O-glycosyl compounds; GO:0016762,xyloglucan:xyloglucosyl transferase activity; GO:0042546,cell wall biogenesis; GO:0071555,cell wall organization; GO:0010411,xyloglucan metabolic process	--	At4g37800	gb|KVI02743.1|	XTH7_ARATH, RecName: Full=Probable xyloglucan endotransglucosylase/hydrolase protein 7; Short=At-XTH7; Short=XTH-7; EC=2.4.1.207; Flags: Precursor;	A0A118K1E2_CYNCS, RecName: Full=Xyloglucan endotransglucosylase/hydrolase {ECO:0000256|RuleBase:RU361120}; EC=2.4.1.207 {ECO:0000256|RuleBase:RU361120};
TRINITY_DN103905_c2_g2	27.1609	235.688	-3.13	9.74e-41	5.71e-39	down	GO:0005634,nucleus; GO:0003700,DNA binding transcription factor activity; GO:0044212,transcription regulatory region DNA binding; GO:0080060,integument development; GO:0045995,regulation of embryonic development; GO:0009753,response to jasmonic acid; GO:0048317,seed morphogenesis; GO:0006351,transcription, DNA-templated	--	At3g15510	gb|PLY76511.1|	NAC56_ARATH, RecName: Full=NAC transcription factor 56 {ECO:0000303|PubMed:15029955}; Short=AtNAC056 {ECO:0000303|PubMed:15029955}; AltName: Full=NAC domain-containing protein 2 {ECO:0000303|PubMed:11245578}; Short=AtNAC2 {ECO:0000303|PubMed:11245578}; AltName: Full=Protein NAC-REGULATED SEED MORPHOLOGY 1 {ECO:0000303|PubMed:18849494};	A0A251UU14_HELAN, SubName: Full=Putative NAC domain-containing protein {ECO:0000313|EMBL:OTG26252.1};
TRINITY_DN102204_c4_g2	38.1694	614.587	-4	9.88e-41	5.79e-39	down	GO:0005886,plasma membrane; GO:0003779,actin binding	--	At1g58210	gb|KVI08648.1|	NET2A_ARATH, RecName: Full=Protein NETWORKED 2A {ECO:0000303|PubMed:22840520};	A0A103YGI5_CYNCS, SubName: Full=KIP1-like protein {ECO:0000313|EMBL:KVI08648.1};
TRINITY_DN104560_c1_g1	2017.99	122.183	4.04	1.12e-40	6.55e-39	up	GO:0016021,integral component of membrane; GO:0005886,plasma membrane; GO:0005516,calmodulin binding; GO:0009817,defense response to fungus, incompatible interaction	--	At1g61560	gb|PLY74237.1|	MLO6_ARATH, RecName: Full=MLO-like protein 6; Short=AtMlo6;	A0A251VQM0_HELAN, RecName: Full=MLO-like protein {ECO:0000256|RuleBase:RU280816};
TRINITY_DN107566_c1_g1	1947.24	137.79	3.82	1.2e-40	7.02e-39	up	GO:0009507,chloroplast; GO:0015934,large ribosomal subunit; GO:0019843,rRNA binding; GO:0003735,structural constituent of ribosome; GO:0006412,translation	K02890: RP-L22, MRPL22, rplV; large subunit ribosomal protein L22	At1g52370	gb|KVH97161.1|	RK22_ODOSI, RecName: Full=50S ribosomal protein L22, chloroplastic;	A0A103XUK8_CYNCS, SubName: Full=Ribosomal protein L22, bacterial/chloroplast-type {ECO:0000313|EMBL:KVH97161.1};
TRINITY_DN101419_c2_g1	2875.65	6661.93	-1.21	1.28e-40	7.48e-39	down	--	--	--	--	--	--
TRINITY_DN106488_c4_g4	550.747	11.5929	5.58	1.33e-40	7.78e-39	up	--	K00993: EPT1; ethanolaminephosphotransferase [EC:2.7.8.1]	At1g13480	ref|XP_022011615.1|	--	A0A251S882_HELAN, SubName: Full=Uncharacterized protein {ECO:0000313|EMBL:OTF94782.1};
TRINITY_DN107714_c1_g1	1974.82	314.633	2.65	1.34e-40	7.81e-39	up	GO:0005618,cell wall; GO:0005576,extracellular region; GO:0045330,aspartyl esterase activity; GO:0004857,enzyme inhibitor activity; GO:0030599,pectinesterase activity; GO:0042545,cell wall modification; GO:0045490,pectin catabolic process	K01051: E3.1.1.11; pectinesterase [EC:3.1.1.11]	At3g14310	ref|XP_021997037.1|	PME3_CITSI, RecName: Full=Pectinesterase 3; Short=PE 3; EC=3.1.1.11; AltName: Full=Pectin methylesterase 3; Flags: Precursor;	A0A251SZG6_HELAN, RecName: Full=Pectinesterase {ECO:0000256|RuleBase:RU000589}; EC=3.1.1.11 {ECO:0000256|RuleBase:RU000589};
TRINITY_DN98980_c1_g1	2.24809	412.878	-7.52	1.35e-40	7.88e-39	down	GO:0050247,raucaffricine beta-glucosidase activity; GO:0050506,vomilenine glucosyltransferase activity; GO:0009821,alkaloid biosynthetic process; GO:0005975,carbohydrate metabolic process	K01188: E3.2.1.21; beta-glucosidase [EC:3.2.1.21]	At2g44480	gb|KVH91147.1|	RG1_RAUSE, RecName: Full=Raucaffricine-O-beta-D-glucosidase; Short=Raucaffricine beta-glucosidase; Short=RsRG; EC=3.2.1.125; AltName: Full=Vomilenine glucosyltransferase; Short=RsVGT; EC=2.4.1.219;	A0A118JTL8_CYNCS, SubName: Full=Uncharacterized protein {ECO:0000313|EMBL:KVH91147.1};
TRINITY_DN102500_c0_g2	2865.57	2.63998	10.07	1.41e-40	8.22e-39	up	GO:0034005,germacrene-A synthase activity; GO:0000287,magnesium ion binding; GO:0045338,farnesyl diphosphate metabolic process; GO:0016114,terpenoid biosynthetic process	K22065: TPS1; alpha-copaene/(+)-delta-cadinene synthase [EC:4.2.3.133 4.2.3.13]	At3g14490	gb|AET95645.1|	GASS_CICIN, RecName: Full=Germacrene A synthase short form; Short=CiGASsh; EC=4.2.3.23;	I1TE91_CYNCS, SubName: Full=Germacrene A synthase {ECO:0000313|EMBL:AET95645.1}; EC=4.2.3.23 {ECO:0000313|EMBL:AET95645.1};
TRINITY_DN103361_c4_g2	2909.34	1165.68	1.32	1.44e-40	8.38e-39	up	--	--	--	--	--	--
TRINITY_DN100717_c1_g5	843.222	6.70509	6.97	1.49e-40	8.66e-39	up	GO:0005615,extracellular space; GO:0042973,glucan endo-1,3-beta-D-glucosidase activity; GO:0005975,carbohydrate metabolic process; GO:0006952,defense response	K19893: GN5_6; glucan endo-1,3-beta-glucosidase 5/6 [EC:3.2.1.39]	At3g57270	gb|KVH99895.1|	E13G_TOBAC, RecName: Full=Glucan endo-1,3-beta-glucosidase, acidic isoform GI9; EC=3.2.1.39; AltName: Full=(1->3)-beta-glucan endohydrolase; Short=(1->3)-beta-glucanase; AltName: Full=Beta-1,3-endoglucanase; AltName: Full=PR-2B; AltName: Full=PR-36; Flags: Precursor;	A0A124SEE8_CYNCS, SubName: Full=Glycoside hydrolase, catalytic domain-containing protein {ECO:0000313|EMBL:KVH99895.1};
TRINITY_DN101411_c0_g4	361.518	102.647	1.82	1.58e-40	9.14e-39	up	GO:0005874,microtubule; GO:0005777,peroxisome; GO:0018812,3-hydroxyacyl-CoA dehydratase activity; GO:0003857,3-hydroxyacyl-CoA dehydrogenase activity; GO:0008692,3-hydroxybutyryl-CoA epimerase activity; GO:0004165,dodecenoyl-CoA delta-isomerase activity; GO:0004300,enoyl-CoA hydratase activity; GO:0008017,microtubule binding; GO:0003729,mRNA binding; GO:0006635,fatty acid beta-oxidation	K00074: paaH, hbd, fadB, mmgB; 3-hydroxybutyryl-CoA dehydrogenase [EC:1.1.1.157]	At3g15290	ref|XP_021989116.1|	MFP_ORYSJ, RecName: Full=Peroxisomal fatty acid beta-oxidation multifunctional protein; Short=MFP; Includes: RecName: Full=Enoyl-CoA hydratase/3-2-trans-enoyl-CoA isomerase/3-hydroxybutyryl-CoA epimerase; EC=4.2.1.17; EC=5.1.2.3; EC=5.3.3.8; Includes: RecName: Full=3-hydroxyacyl-CoA dehydrogenase; EC=1.1.1.35;	A0A251TME3_HELAN, SubName: Full=Putative 3-hydroxyacyl-CoA dehydrogenase family protein {ECO:0000313|EMBL:OTG11792.1};
TRINITY_DN104326_c3_g1	146.228	624.64	-2.1	1.67e-40	9.64e-39	down	GO:0050661,NADP binding; GO:0047037,salutaridine reductase (NADPH) activity; GO:0097295,morphine biosynthetic process	K00079: CBR1; carbonyl reductase 1 [EC:1.1.1.184 1.1.1.189 1.1.1.197]	At5g51030	gb|KVI06134.1|	SALR_PAPSO, RecName: Full=Salutaridine reductase {ECO:0000303|PubMed:16968522}; EC=1.1.1.248 {ECO:0000269|PubMed:16968522, ECO:0000269|PubMed:19648114};	A0A103YBN8_CYNCS, SubName: Full=Glucose/ribitol dehydrogenase {ECO:0000313|EMBL:KVI06134.1};
TRINITY_DN101045_c8_g1	6336.58	13546.7	-1.1	1.67e-40	9.66e-39	down	--	--	--	--	--	--
TRINITY_DN95583_c9_g1	868.72	394.37	1.14	1.77e-40	1.02e-38	up	--	--	--	--	--	--
TRINITY_DN82727_c0_g1	7.0986	191.029	-4.76	1.79e-40	1.03e-38	down	GO:0005737,cytoplasm; GO:0051537,2 iron, 2 sulfur cluster binding; GO:0009055,electron transfer activity; GO:0046872,metal ion binding; GO:0015035,protein disulfide oxidoreductase activity; GO:0045454,cell redox homeostasis	--	At2g30540	ref|XP_021987583.1|	GRXS9_ARATH, RecName: Full=Monothiol glutaredoxin-S9; Short=AtGrxS9; AltName: Full=Protein ROXY 7;	A0A251TG46_HELAN, SubName: Full=Putative glutaredoxin-like, plant II, Thioredoxin-like fold protein {ECO:0000313|EMBL:OTG10100.1};
TRINITY_DN106607_c1_g2	437.434	8.99463	5.6	2.12e-40	1.22e-38	up	GO:0005737,cytoplasm; GO:0005634,nucleus; GO:0005886,plasma membrane; GO:0005524,ATP binding; GO:0004675,transmembrane receptor protein serine/threonine kinase activity; GO:0007166,cell surface receptor signaling pathway; GO:0006952,defense response; GO:0006468,protein phosphorylation	K04733: IRAK4; interleukin-1 receptor-associated kinase 4 [EC:2.7.11.1]	At2g02800	gb|PLY92205.1|	PBL3_ARATH, RecName: Full=Probable serine/threonine-protein kinase PBL3 {ECO:0000305}; EC=2.7.11.1 {ECO:0000305}; AltName: Full=PBS1-like protein 3 {ECO:0000303|PubMed:20413097}; AltName: Full=Protein kinase 2B {ECO:0000305};	A0A251VG35_HELAN, SubName: Full=Putative serine/threonine/dual specificity protein kinase, catalytic domain-containing protein {ECO:0000313|EMBL:OTG34096.1};
TRINITY_DN97060_c1_g1	2143.19	683.593	1.65	2.14e-40	1.23e-38	up	--	--	--	ref|XP_022029345.1|	--	A0A251VAW1_HELAN, SubName: Full=Putative heavy metal-associated domain, HMA {ECO:0000313|EMBL:OTG32286.1};
TRINITY_DN107274_c3_g1	132.657	419.954	-1.66	2.38e-40	1.37e-38	down	--	--	At2g03140_1	gb|KVH94043.1|	--	A0A103XNL5_CYNCS, SubName: Full=Uncharacterized protein {ECO:0000313|EMBL:KVH94043.1};
TRINITY_DN105886_c2_g1	635.982	3752	-2.56	2.6e-40	1.49e-38	down	GO:0005829,cytosol; GO:0004029,aldehyde dehydrogenase (NAD) activity; GO:0050269,coniferyl-aldehyde dehydrogenase activity; GO:0009699,phenylpropanoid biosynthetic process	K12355: REF1; coniferyl-aldehyde dehydrogenase [EC:1.2.1.68]	At3g48000	ref|XP_021990436.1|	AL2C4_ARATH, RecName: Full=Aldehyde dehydrogenase family 2 member C4; EC=1.2.1.3; AltName: Full=ALDH1a; AltName: Full=Protein REDUCED EPIDERMAL FLUORESCENCE 1;	A0A251TRH8_HELAN, SubName: Full=Putative aldehyde/histidinol dehydrogenase {ECO:0000313|EMBL:OTG13192.1};
TRINITY_DN106008_c3_g4	370.555	1001.95	-1.44	3.19e-40	1.83e-38	down	GO:0005737,cytoplasm; GO:0005634,nucleus; GO:0005886,plasma membrane; GO:0010187,negative regulation of seed germination; GO:0016567,protein ubiquitination; GO:0009737,response to abscisic acid; GO:0009651,response to salt stress	--	At5g13060	gb|PLY81460.1|	ARIA_ARATH, RecName: Full=ARM REPEAT PROTEIN INTERACTING WITH ABF2; Short=ARIA;	A0A251VL13_HELAN, SubName: Full=Putative ARM repeat protein interacting with ABF2 {ECO:0000313|EMBL:OTG36029.1};
TRINITY_DN95437_c1_g2	262.069	2036.8	-2.96	3.21e-40	1.84e-38	down	--	--	--	--	--	--
TRINITY_DN104370_c2_g2	423.138	966.524	-1.19	4.03e-40	2.3e-38	down	GO:0016021,integral component of membrane; GO:0020037,heme binding; GO:0005506,iron ion binding; GO:0004497,monooxygenase activity; GO:0016705,oxidoreductase activity, acting on paired donors, with incorporation or reduction of molecular oxygen	--	At3g26300	gb|KVI00606.1|	C7D55_HYOMU, RecName: Full=Premnaspirodiene oxygenase; Short=HPO; EC=1.14.13.121; AltName: Full=Cytochrome P450 71D55;	A0A103Y1A0_CYNCS, SubName: Full=Uncharacterized protein {ECO:0000313|EMBL:KVI00606.1}; Flags: Fragment;
TRINITY_DN99292_c0_g1	1809.32	2.27872	9.6	4.66e-40	2.65e-38	up	GO:0005576,extracellular region; GO:0020037,heme binding; GO:0046872,metal ion binding; GO:0004601,peroxidase activity; GO:0042744,hydrogen peroxide catabolic process; GO:0006979,response to oxidative stress	K00430: E1.11.1.7; peroxidase [EC:1.11.1.7]	At5g64120	gb|KVH93453.1|	PERN1_TOBAC, RecName: Full=Peroxidase N1; EC=1.11.1.7; AltName: Full=Peroxidase B2; AltName: Full=Peroxidase B3; Flags: Precursor;	A0A103XME2_CYNCS, RecName: Full=Peroxidase {ECO:0000256|RuleBase:RU362060, ECO:0000256|SAAS:SAAS00709852}; EC=1.11.1.7 {ECO:0000256|RuleBase:RU362060, ECO:0000256|SAAS:SAAS00709852};
TRINITY_DN107139_c0_g1	5138.77	1865.96	1.46	5.7e-40	3.25e-38	up	GO:0005794,Golgi apparatus; GO:0016021,integral component of membrane; GO:0009506,plasmodesma; GO:0005773,vacuole; GO:0016413,O-acetyltransferase activity; GO:0071554,cell wall organization or biogenesis	--	At2g42570	gb|KVI04367.1|	TBL39_ARATH, RecName: Full=Protein trichome birefringence-like 39;	A0A118K2H3_CYNCS, SubName: Full=PC-Esterase {ECO:0000313|EMBL:KVI04367.1};
TRINITY_DN105633_c0_g3	1519.3	591.064	1.36	6.2e-40	3.52e-38	up	GO:0005634,nucleus; GO:0003700,DNA binding transcription factor activity; GO:0043565,sequence-specific DNA binding; GO:0042742,defense response to bacterium; GO:0050832,defense response to fungus; GO:0009864,induced systemic resistance, jasmonic acid mediated signaling pathway; GO:1900056,negative regulation of leaf senescence; GO:0045892,negative regulation of transcription, DNA-templated; GO:00…	K19613: SHOC2, SUR8; leucine-rich repeat protein SHOC2	At3g56400	ref|XP_022006517.1|	WRK70_ARATH, RecName: Full=Probable WRKY transcription factor 70; AltName: Full=WRKY DNA-binding protein 70;	A0A251SND0_HELAN, SubName: Full=Putative WRKY domain-containing protein {ECO:0000313|EMBL:OTF99805.1};
TRINITY_DN99609_c0_g2	480.89	138.302	1.8	8.22e-40	4.67e-38	up	GO:0005829,cytosol; GO:0005739,mitochondrion; GO:0005524,ATP binding; GO:0004370,glycerol kinase activity; GO:0042742,defense response to bacterium; GO:0019563,glycerol catabolic process; GO:0046167,glycerol-3-phosphate biosynthetic process; GO:0009617,response to bacterium; GO:0080167,response to karrikin; GO:0010188,response to microbial phytotoxin; GO:0002237,response to molecule of bacterial …	K00864: glpK, GK; glycerol kinase [EC:2.7.1.30]	At1g80460	gb|KVH98052.1|	GLPK_ARATH, RecName: Full=Glycerol kinase; Short=Glycerokinase; EC=2.7.1.30; AltName: Full=ATP:glycerol 3-phosphotransferase; AltName: Full=Protein GLYCEROL INSENSITIVE 1; AltName: Full=Protein NONHOST RESISTANCE TO P. S. PHASEOLICOLA 1;	A0A118JYN3_CYNCS, SubName: Full=Carbohydrate kinase, FGGY, conserved site-containing protein {ECO:0000313|EMBL:KVH98052.1};
TRINITY_DN105447_c2_g2	2791.78	321.55	3.12	9.25e-40	5.25e-38	up	GO:0016758,transferase activity, transferring hexosyl groups; GO:0008152,metabolic process	--	At3g21760	gb|PLY80108.1|	U71E1_STERE, RecName: Full=UDP-glycosyltransferase 71E1 {ECO:0000303|PubMed:15610349}; EC=2.4.1.- {ECO:0000305};	A0A251T5G6_HELAN, RecName: Full=Glycosyltransferase {ECO:0000256|RuleBase:RU362057}; EC=2.4.1.- {ECO:0000256|RuleBase:RU362057};
TRINITY_DN101034_c0_g2	704.051	23.5634	4.9	9.99e-40	5.66e-38	up	--	--	--	--	--	--
TRINITY_DN102985_c4_g1	14.8749	215.488	-3.87	1.09e-39	6.17e-38	down	GO:0005634,nucleus; GO:0003700,DNA binding transcription factor activity; GO:0043565,sequence-specific DNA binding; GO:0009738,abscisic acid-activated signaling pathway; GO:0019760,glucosinolate metabolic process; GO:0006351,transcription, DNA-templated	--	At5g51990	gb|KVH88481.1|	DRE1D_ARATH, RecName: Full=Dehydration-responsive element-binding protein 1D; Short=Protein DREB1D; AltName: Full=C-repeat/dehydration-responsive element-binding factor 4; Short=C-repeat-binding factor 4; Short=CRT/DRE-binding factor 4;	A0A118JSN7_CYNCS, SubName: Full=AP2/ERF domain-containing protein {ECO:0000313|EMBL:KVH88481.1};
TRINITY_DN105722_c3_g3	16.1301	201.324	-3.65	1.2e-39	6.8e-38	down	GO:0005789,endoplasmic reticulum membrane; GO:0010008,endosome membrane; GO:0016021,integral component of membrane; GO:0005886,plasma membrane; GO:0008289,lipid binding; GO:0006952,defense response	--	At3g54800	gb|PLY84804.1|	EDR2L_ARATH, RecName: Full=Protein ENHANCED DISEASE RESISTANCE 2-like;	A0A251T1N1_HELAN, SubName: Full=Putative pleckstrin (PH) and lipid-binding START domains-containing protein {ECO:0000313|EMBL:OTG05008.1};
TRINITY_DN96820_c0_g2	423.033	1743.27	-2.04	1.43e-39	8.05e-38	down	GO:0009507,chloroplast; GO:0009570,chloroplast stroma; GO:0047769,arogenate dehydratase activity; GO:0009094,L-phenylalanine biosynthetic process	K05359: ADT, PDT; arogenate/prephenate dehydratase [EC:4.2.1.91 4.2.1.51]	At1g08250	gb|KVH90655.1|	AROD6_ARATH, RecName: Full=Arogenate dehydratase/prephenate dehydratase 6, chloroplastic; Short=AtADT6; Short=AtPDT6; EC=4.2.1.51; EC=4.2.1.91; Flags: Precursor;	A0A124SBH7_CYNCS, RecName: Full=Arogenate dehydratase {ECO:0000256|RuleBase:RU363004}; EC=4.2.1.91 {ECO:0000256|RuleBase:RU363004};
TRINITY_DN108003_c1_g4	1566.72	477.736	1.71	1.45e-39	8.19e-38	up	--	--	--	--	--	--
TRINITY_DN100452_c1_g4	234.247	5.95731	5.28	1.52e-39	8.59e-38	up	GO:0005829,cytosol; GO:0016491,oxidoreductase activity	K08081: TR1; tropinone reductase I [EC:1.1.1.206]	At5g06060	gb|PLY95053.1|	TRNHF_ARATH, RecName: Full=Tropinone reductase homolog At5g06060 {ECO:0000305}; EC=1.1.1.- {ECO:0000305};	A0A103YD92_CYNCS, SubName: Full=Glucose/ribitol dehydrogenase {ECO:0000313|EMBL:KVI06967.1};
TRINITY_DN96165_c0_g2	373.004	33.6283	3.47	1.54e-39	8.69e-38	up	--	--	--	--	--	--
TRINITY_DN102834_c2_g4	771.196	60.7052	3.67	1.81e-39	1.02e-37	up	GO:0005634,nucleus; GO:0046872,metal ion binding; GO:0016491,oxidoreductase activity	--	At3g21360	gb|PLY88746.1|	Y3136_ARATH, RecName: Full=Clavaminate synthase-like protein At3g21360; EC=1.-.-.-;	A0A251U1V7_HELAN, SubName: Full=Putative tauD/TfdA-like domain-containing protein {ECO:0000313|EMBL:OTG16826.1};
TRINITY_DN96264_c0_g5	11.8832	174.416	-3.88	2.12e-39	1.19e-37	down	GO:0005829,cytosol; GO:0016020,membrane; GO:0016831,carboxy-lyase activity; GO:0000287,magnesium ion binding; GO:0004737,pyruvate decarboxylase activity; GO:0030976,thiamine pyrophosphate binding; GO:0034059,response to anoxia	K01568: PDC, pdc; pyruvate decarboxylase [EC:4.1.1.1]	At4g33070	gb|PLY73011.1|	PDC1_ARATH, RecName: Full=Pyruvate decarboxylase 1; Short=AtPDC1; EC=4.1.1.1;	A0A251S4B5_HELAN, SubName: Full=Putative thiamine pyrophosphate (TPP)-dependent enzyme {ECO:0000313|EMBL:OTF93689.1};
TRINITY_DN100921_c1_g4	2.00346	473.33	-7.94	2.22e-39	1.24e-37	down	--	--	--	--	--	--
TRINITY_DN106160_c1_g1	26544.1	12234	1.12	2.34e-39	1.31e-37	up	--	--	--	gb|PLY80967.1|	--	K4B3C4_SOLLC, SubName: Full=Uncharacterized protein {ECO:0000313|EnsemblPlants:Solyc01g109100.2.1};
TRINITY_DN100743_c2_g3	126.521	574.334	-2.18	2.45e-39	1.37e-37	down	GO:0010279,indole-3-acetic acid amido synthetase activity; GO:0010252,auxin homeostasis; GO:0010120,camalexin biosynthetic process; GO:1901183,positive regulation of camalexin biosynthetic process; GO:0009733,response to auxin	K14487: GH3; auxin responsive GH3 gene family	At4g27260	ref|XP_022001455.1|	GH35_ARATH, RecName: Full=Indole-3-acetic acid-amido synthetase GH3.5; EC=6.3.2.-; AltName: Full=Auxin-responsive GH3-like protein 5; Short=AtGH3-5;	A0A251STJ7_HELAN, SubName: Full=Putative GH3 family {ECO:0000313|EMBL:OTG01939.1};
TRINITY_DN97774_c9_g1	200.241	505.077	-1.34	2.46e-39	1.37e-37	down	GO:0080008,Cul4-RING E3 ubiquitin ligase complex	--	At4g02730	gb|KVH94379.1|	WDR5B_ARATH, RecName: Full=COMPASS-like H3K4 histone methylase component WDR5B {ECO:0000303|PubMed:19567704}; Short=AtWDR5B {ECO:0000303|PubMed:19567704};	A0A103XPJ4_CYNCS, SubName: Full=G-protein beta WD-40 repeat-containing protein {ECO:0000313|EMBL:KVH94379.1}; Flags: Fragment;
TRINITY_DN104730_c1_g3	4743.66	1063.38	2.16	2.46e-39	1.37e-37	up	GO:0005739,mitochondrion; GO:0008863,formate dehydrogenase (NAD+) activity; GO:0051287,NAD binding; GO:0016616,oxidoreductase activity, acting on the CH-OH group of donors, NAD or NADP as acceptor	K00122: FDH; formate dehydrogenase [EC:1.17.1.9]	At5g14780	ref|XP_022034203.1|	FDH_SOLTU, RecName: Full=Formate dehydrogenase, mitochondrial {ECO:0000255|HAMAP-Rule:MF_03210, ECO:0000303|Ref.1}; Short=FDH {ECO:0000255|HAMAP-Rule:MF_03210}; EC=1.17.1.9 {ECO:0000255|HAMAP-Rule:MF_03210}; AltName: Full=NAD-dependent formate dehydrogenase {ECO:0000255|HAMAP-Rule:MF_03210, ECO:0000303|PubMed:8278546}; Flags: Precursor;	A0A251UXL3_HELAN, RecName: Full=Formate dehydrogenase, mitochondrial {ECO:0000256|HAMAP-Rule:MF_03210}; Short=FDH {ECO:0000256|HAMAP-Rule:MF_03210}; EC=1.17.1.9 {ECO:0000256|HAMAP-Rule:MF_03210}; AltName: Full=NAD-dependent formate dehydrogenase {ECO:0000256|HAMAP-Rule:MF_03210};
TRINITY_DN104394_c4_g2	330.019	83.1741	1.99	2.55e-39	1.42e-37	up	GO:0005737,cytoplasm; GO:0005524,ATP binding; GO:0004674,protein serine/threonine kinase activity	K04733: IRAK4; interleukin-1 receptor-associated kinase 4 [EC:2.7.11.1]	At2g11520	ref|XP_022027411.1|	CRCK3_ARATH, RecName: Full=Calmodulin-binding receptor-like cytoplasmic kinase 3; EC=2.7.11.1; Flags: Precursor;	A0A251V3Z8_HELAN, SubName: Full=Putative calmodulin-binding receptor-like cytoplasmic kinase 3 {ECO:0000313|EMBL:OTG30320.1};
TRINITY_DN107227_c2_g7	93.3203	434.523	-2.21	2.69e-39	1.5e-37	down	GO:0000139,Golgi membrane; GO:0005886,plasma membrane; GO:0015031,protein transport	--	At2g21520	gb|KVI01992.1|	SFH8_ARATH, RecName: Full=Phosphatidylinositol/phosphatidylcholine transfer protein SFH8; AltName: Full=Protein SEC FOURTEEN HOMOLOGS 8; Short=AtSFH8;	A0A103Y3S5_CYNCS, SubName: Full=Cellular retinaldehyde binding/alpha-tocopherol transport {ECO:0000313|EMBL:KVI01992.1};
TRINITY_DN103665_c1_g1	629.702	107.384	2.55	3.09e-39	1.72e-37	up	--	--	--	--	--	--
TRINITY_DN106614_c0_g3	21.9894	291.453	-3.72	3.92e-39	2.18e-37	down	GO:0005618,cell wall; GO:0005576,extracellular region; GO:0016020,membrane; GO:0009664,plant-type cell wall organization; GO:0006949,syncytium formation	--	At2g40610	ref|XP_022006484.1|	EXPA8_ARATH, RecName: Full=Expansin-A8; Short=AtEXPA8; AltName: Full=Alpha-expansin-8; Short=At-EXP8; Short=AtEx8; AltName: Full=Ath-ExpAlpha-1.11; Flags: Precursor;	A0A251SLL8_HELAN, SubName: Full=Putative expansin A8 {ECO:0000313|EMBL:OTF99756.1};
TRINITY_DN107282_c4_g4	11837.3	1096.24	3.43	4.11e-39	2.28e-37	up	--	--	--	--	--	--
TRINITY_DN101603_c4_g2	1187.91	232.785	2.35	4.48e-39	2.48e-37	up	GO:0005576,extracellular region; GO:0009530,primary cell wall; GO:0005199,structural constituent of cell wall; GO:0009664,plant-type cell wall organization	--	At1g21310	gb|OMO81634.1|	EXTN3_ARATH, RecName: Full=Extensin-3 {ECO:0000303|PubMed:11475326}; Short=AtExt3 {ECO:0000303|PubMed:11475326}; Short=AtExt5 {ECO:0000303|PubMed:11475326}; AltName: Full=Extensin-3/5 {ECO:0000303|PubMed:20395450}; AltName: Full=Protein ROOT-SHOOT-HYPOCOTYL-DEFECTIVE {ECO:0000303|PubMed:12034904}; Flags: Precursor;	A0A1R3IGC8_COCAP, SubName: Full=Uncharacterized protein {ECO:0000313|EMBL:OMO81634.1};
TRINITY_DN101215_c8_g2	269.426	1278.07	-2.25	4.96e-39	2.74e-37	down	GO:0005634,nucleus; GO:0000981,RNA polymerase II transcription factor activity, sequence-specific DNA binding; GO:0043565,sequence-specific DNA binding; GO:0001135,transcription factor activity, RNA polymerase II transcription factor recruiting; GO:0044212,transcription regulatory region DNA binding; GO:0030154,cell differentiation; GO:1901002,positive regulation of response to salt stress; GO:19…	--	At1g48000	ref|XP_021978436.1|	MYB2_ORYSJ, RecName: Full=Transcription factor MYB2 {ECO:0000305}; AltName: Full=Myb-related protein 2 {ECO:0000305}; Short=OsMYB2 {ECO:0000303|PubMed:22301384};	A0A251U887_HELAN, SubName: Full=Putative myb protein {ECO:0000313|EMBL:OTG19565.1};
TRINITY_DN108260_c4_g5	11940.4	4150.98	1.52	5.34e-39	2.95e-37	up	GO:0016491,oxidoreductase activity	K09841: ABA2; xanthoxin dehydrogenase [EC:1.1.1.288]	At3g51680	gb|KVH97692.1|	SILD_FORIN, RecName: Full=Secoisolariciresinol dehydrogenase; EC=1.1.1.331; Flags: Fragment;	A0A118JYF1_CYNCS, SubName: Full=Glucose/ribitol dehydrogenase {ECO:0000313|EMBL:KVH97692.1};
TRINITY_DN106118_c1_g4	64.434	374.525	-2.54	6.38e-39	3.53e-37	down	GO:0055028,cortical microtubule; GO:0005737,cytoplasm; GO:0005524,ATP binding; GO:0008017,microtubule binding; GO:0003777,microtubule motor activity; GO:0071555,cell wall organization; GO:0007018,microtubule-based movement	--	At5g47820	gb|KVI06712.1|	KN4A_GOSHI, RecName: Full=Kinesin-like protein KIN-4A {ECO:0000305}; AltName: Full=GhKINESIN-4A {ECO:0000303|PubMed:25600279};	A0A103YCT0_CYNCS, SubName: Full=Uncharacterized protein {ECO:0000313|EMBL:KVI06712.1};
TRINITY_DN91520_c0_g2	78.5849	1242.29	-3.98	6.46e-39	3.57e-37	down	GO:0032541,cortical endoplasmic reticulum; GO:0005737,cytoplasm; GO:0005783,endoplasmic reticulum; GO:0005789,endoplasmic reticulum membrane; GO:0016020,membrane; GO:0009658,chloroplast organization; GO:0010274,hydrotropism	--	At5g42680	ref|XP_022014030.1|	MIZ1_ARATH, RecName: Full=Protein MIZU-KUSSEI 1;	A0A251VEW9_HELAN, SubName: Full=Uncharacterized protein {ECO:0000313|EMBL:OTG33706.1};
TRINITY_DN101297_c2_g6	180.721	719.11	-2	6.66e-39	3.67e-37	down	GO:0016021,integral component of membrane; GO:0005887,integral component of plasma membrane; GO:0051119,sugar transmembrane transporter activity; GO:0008643,carbohydrate transport	--	At5g53190	gb|KVI04624.1|	SWET3_ARATH, RecName: Full=Bidirectional sugar transporter SWEET3 {ECO:0000303|PubMed:21107422}; Short=AtSWEET3 {ECO:0000303|PubMed:21107422}; AltName: Full=Protein SUGARS WILL EVENTUALLY BE EXPORTED TRANSPORTERS 3 {ECO:0000303|PubMed:21107422};	A0A103Y8U4_CYNCS, RecName: Full=Bidirectional sugar transporter SWEET {ECO:0000256|RuleBase:RU910715};
TRINITY_DN106685_c1_g4	1045.91	2108.47	-1.01	6.68e-39	3.68e-37	down	GO:0048046,apoplast; GO:0009507,chloroplast; GO:0005794,Golgi apparatus; GO:0016020,membrane; GO:0005886,plasma membrane; GO:0009506,plasmodesma; GO:0005773,vacuole; GO:0008289,lipid binding; GO:0002020,protease binding; GO:0007049,cell cycle; GO:0051301,cell division; GO:0009860,pollen tube growth	--	At1g72150	gb|PLY84528.1|	PATL1_ARATH, RecName: Full=Patellin-1;	A0A251VFZ0_HELAN, SubName: Full=Putative cellular retinaldehyde binding/alpha-tocopherol transport {ECO:0000313|EMBL:OTG33611.1};
TRINITY_DN95604_c0_g2	520.1	38.1742	3.76	8.51e-39	4.68e-37	up	--	--	--	--	--	--
TRINITY_DN106163_c0_g1	417.636	36.1925	3.53	1.01e-38	5.54e-37	up	--	--	At1g18270_1	gb|PLY93968.1|	--	A0A251RS64_HELAN, SubName: Full=Putative ketose-bisphosphate aldolase class-II family protein {ECO:0000313|EMBL:OTF87202.1};
TRINITY_DN103612_c0_g7	26.8441	960.655	-5.16	1.06e-38	5.79e-37	down	GO:0016021,integral component of membrane; GO:0005345,purine nucleobase transmembrane transporter activity; GO:0005215,transporter activity; GO:0015853,adenine transport; GO:0015854,guanine transport; GO:0006863,purine nucleobase transport	--	At3g10960	gb|KVI10017.1|	AZG1_ARATH, RecName: Full=Adenine/guanine permease AZG1; AltName: Full=AzgA-homolog protein; AltName: Full=Protein AZAGUANINE RESISTANT 1; Short=AtAzg1;	A0A103YJ36_CYNCS, SubName: Full=Xanthine/uracil/vitamin C permease {ECO:0000313|EMBL:KVI10017.1};
TRINITY_DN105900_c4_g3	3965.99	13995.6	-1.82	1.3e-38	7.11e-37	down	--	--	--	--	--	--
TRINITY_DN106281_c3_g1	1887.42	534.111	1.82	1.36e-38	7.45e-37	up	GO:0009535,chloroplast thylakoid membrane; GO:0016021,integral component of membrane; GO:0005886,plasma membrane; GO:0005385,zinc ion transmembrane transporter activity	--	At1g10970	ref|XP_022001741.1|	ZIP4_ARATH, RecName: Full=Zinc transporter 4, chloroplastic; AltName: Full=ZRT/IRT-like protein 4; Flags: Precursor;	A0A251SUR1_HELAN, SubName: Full=Putative zinc transporter 7 {ECO:0000313|EMBL:OTG02212.1};
TRINITY_DN106433_c3_g1	21.3069	408.392	-4.26	1.46e-38	7.98e-37	down	--	--	--	--	--	--
TRINITY_DN108236_c1_g1	45.8106	356.966	-2.96	1.46e-38	8e-37	down	GO:0016210,naringenin-chalcone synthase activity; GO:0009813,flavonoid biosynthetic process	K00660: CHS; chalcone synthase [EC:2.3.1.74]	At5g13930	dbj|BAV37882.1|	CHSY_CALCH, RecName: Full=Chalcone synthase; EC=2.3.1.74; AltName: Full=Naringenin-chalcone synthase;	A0A1B4XSV2_CARTI, SubName: Full=Chalcone synthase {ECO:0000313|EMBL:BAV37882.1};
TRINITY_DN102864_c3_g2	57.5659	290.924	-2.34	1.71e-38	9.32e-37	down	--	--	--	--	--	--
TRINITY_DN99547_c0_g1	364.443	2974.24	-3.03	1.83e-38	9.98e-37	down	--	--	--	--	--	--
TRINITY_DN106960_c1_g3	4132.94	206.186	4.32	1.92e-38	1.05e-36	up	GO:0016021,integral component of membrane; GO:0016717,oxidoreductase activity, acting on paired donors, with oxidation of a pair of donors resulting in the reduction of molecular oxygen to two molecules of water; GO:0006636,unsaturated fatty acid biosynthetic process	K10256: FAD2; omega-6 fatty acid desaturase / acyl-lipid omega-6 desaturase (Delta-12 desaturase) [EC:1.14.19.6 1.14.19.22]	At3g12120	gb|AGC65505.1|	FAD2_CALOF, RecName: Full=Delta(12) fatty acid desaturase FAD2 {ECO:0000303|PubMed:11161042}; Short=CoFad2 {ECO:0000303|PubMed:11161042}; EC=1.14.19.- {ECO:0000305};	L7VFG3_CARTI, SubName: Full=FAD2-8 protein {ECO:0000313|EMBL:AGC65505.1}; EC=1.14.19.6 {ECO:0000313|EMBL:AGC65505.1};
TRINITY_DN106581_c1_g1	606.468	72.3574	3.07	2.13e-38	1.16e-36	up	GO:0005576,extracellular region; GO:0009530,primary cell wall; GO:0005199,structural constituent of cell wall; GO:0009664,plant-type cell wall organization	--	At1g21310	gb|OMO81634.1|	EXTN3_ARATH, RecName: Full=Extensin-3 {ECO:0000303|PubMed:11475326}; Short=AtExt3 {ECO:0000303|PubMed:11475326}; Short=AtExt5 {ECO:0000303|PubMed:11475326}; AltName: Full=Extensin-3/5 {ECO:0000303|PubMed:20395450}; AltName: Full=Protein ROOT-SHOOT-HYPOCOTYL-DEFECTIVE {ECO:0000303|PubMed:12034904}; Flags: Precursor;	A0A1R3IGC8_COCAP, SubName: Full=Uncharacterized protein {ECO:0000313|EMBL:OMO81634.1};
TRINITY_DN99585_c1_g1	174.916	12.4104	3.82	2.15e-38	1.17e-36	up	GO:0005634,nucleus; GO:0030246,carbohydrate binding; GO:0016567,protein ubiquitination	--	At5g52120	gb|KVH84535.1|	P2A14_ARATH, RecName: Full=F-box protein PP2-A14; AltName: Full=Protein PHLOEM PROTEIN 2-LIKE A14; Short=AtPP2-A14; AltName: Full=SKP1-interacting partner 13;	A0A124S9J5_CYNCS, SubName: Full=F-box domain, cyclin-like protein {ECO:0000313|EMBL:KVH84535.1};
TRINITY_DN102770_c0_g3	1556.39	3126.17	-1.01	2.15e-38	1.17e-36	down	GO:0005576,extracellular region; GO:0003993,acid phosphatase activity; GO:0046872,metal ion binding	--	At3g52820	gb|KVI07899.1|	PPA22_ARATH, RecName: Full=Purple acid phosphatase 22; EC=3.1.3.2; Flags: Precursor;	A0A103YF19_CYNCS, RecName: Full=Purple acid phosphatase {ECO:0000256|RuleBase:RU361203}; EC=3.1.3.2 {ECO:0000256|RuleBase:RU361203};
TRINITY_DN100626_c7_g1	402.188	8.28929	5.59	2.17e-38	1.18e-36	up	GO:0016021,integral component of membrane; GO:0005886,plasma membrane; GO:0022857,transmembrane transporter activity	--	At4g30420	ref|XP_021989454.1|	WTR37_ARATH, RecName: Full=WAT1-related protein At4g30420;	A0A251TNK1_HELAN, RecName: Full=WAT1-related protein {ECO:0000256|RuleBase:RU363077};
TRINITY_DN104376_c1_g1	572.504	17.5789	5.04	2.35e-38	1.27e-36	up	--	--	--	gb|KVI08703.1|	--	A0A124SH81_CYNCS, SubName: Full=Uncharacterized protein {ECO:0000313|EMBL:KVI08703.1};
TRINITY_DN96182_c4_g1	85.7269	315.686	-1.88	2.74e-38	1.48e-36	down	GO:0005634,nucleus; GO:0003700,DNA binding transcription factor activity; GO:0044212,transcription regulatory region DNA binding; GO:0006351,transcription, DNA-templated	--	At4g34610	gb|ALF46648.1|	BLH6_ARATH, RecName: Full=BEL1-like homeodomain protein 6; Short=BEL1-like protein 6;	A0A1B0T6Y5_CHRMO, SubName: Full=TALE protein {ECO:0000313|EMBL:ALF46648.1}; Flags: Fragment;
TRINITY_DN97589_c0_g1	827.307	83.846	3.3	2.99e-38	1.62e-36	up	GO:0005829,cytosol; GO:0012505,endomembrane system; GO:0000145,exocyst; GO:0016020,membrane; GO:0005634,nucleus; GO:0045335,phagocytic vesicle; GO:0031982,vesicle; GO:0006952,defense response; GO:0006887,exocytosis; GO:1900426,positive regulation of defense response to bacterium; GO:0009617,response to bacterium; GO:0009620,response to fungus; GO:0002237,response to molecule of bacterial origin	K07195: EXOC7, EXO70; exocyst complex component 7	At3g09520	gb|KVI09556.1|	E70H1_ARATH, RecName: Full=Exocyst complex component EXO70H1 {ECO:0000303|PubMed:16942608}; Short=AtExo70h1 {ECO:0000303|PubMed:16942608}; AltName: Full=Exocyst subunit Exo70 family protein H1 {ECO:0000303|PubMed:16942608};	A0A124SHH5_CYNCS, SubName: Full=Cullin repeat-like-containing domain-containing protein {ECO:0000313|EMBL:KVI09556.1};
TRINITY_DN99225_c0_g5	14.7915	225.749	-3.94	3.27e-38	1.76e-36	down	--	--	At3g16490	gb|KVH92991.1|	--	A0A103XLH4_CYNCS, SubName: Full=Uncharacterized protein {ECO:0000313|EMBL:KVH92991.1};
TRINITY_DN100453_c0_g1	328.691	26.0635	3.65	3.32e-38	1.79e-36	up	GO:0046872,metal ion binding; GO:0016491,oxidoreductase activity	K13229: BX6; 2,4-dihydroxy-1,4-benzoxazin-3-one-glucoside dioxygenase [EC:1.14.11.59]	At1g06650	gb|KVH35853.1|	ACCH3_ARATH, RecName: Full=1-aminocyclopropane-1-carboxylate oxidase homolog 3;	A0A103UHV1_CYNCS, SubName: Full=Non-heme dioxygenase N-terminal domain-containing protein {ECO:0000313|EMBL:KVH35853.1};
TRINITY_DN96483_c1_g1	2627.56	21912.6	-3.06	3.48e-38	1.88e-36	down	--	--	--	--	--	--
TRINITY_DN97391_c1_g1	393.298	108.199	1.86	4.26e-38	2.3e-36	up	GO:0009507,chloroplast; GO:0005829,cytosol; GO:0004177,aminopeptidase activity	--	At4g02340	gb|KVH89552.1|	PIP_ARATH, RecName: Full=Proline iminopeptidase; Short=PIP; EC=3.4.11.5; AltName: Full=Prolyl aminopeptidase; Short=PAP;	A0A103XF78_CYNCS, SubName: Full=Uncharacterized protein {ECO:0000313|EMBL:KVH89552.1};
TRINITY_DN100452_c1_g5	446.574	14.9971	4.89	4.76e-38	2.56e-36	up	GO:0005829,cytosol; GO:0016491,oxidoreductase activity	K08081: TR1; tropinone reductase I [EC:1.1.1.206]	At5g06060	gb|PLY95053.1|	TRNHF_ARATH, RecName: Full=Tropinone reductase homolog At5g06060 {ECO:0000305}; EC=1.1.1.- {ECO:0000305};	A0A103YD92_CYNCS, SubName: Full=Glucose/ribitol dehydrogenase {ECO:0000313|EMBL:KVI06967.1};
TRINITY_DN99802_c3_g2	1370.59	138.051	3.31	5.15e-38	2.76e-36	up	GO:0005634,nucleus	--	At3g59220	gb|KVH91382.1|	PIRL_SOLLC, RecName: Full=Pirin-like protein;	A0A103XIP1_CYNCS, SubName: Full=Uncharacterized protein {ECO:0000313|EMBL:KVH91382.1};
TRINITY_DN100455_c1_g1	171.021	526.971	-1.63	6.62e-38	3.55e-36	down	--	--	--	--	--	--
TRINITY_DN99093_c1_g6	522.2	38.4992	3.76	6.88e-38	3.68e-36	up	--	K01785: galM, GALM; aldose 1-epimerase [EC:5.1.3.3]	At3g47800	gb|KVH92716.1|	--	A0A103XL39_CYNCS, SubName: Full=Aldose 1-epimerase {ECO:0000313|EMBL:KVH92716.1};
TRINITY_DN99186_c5_g1	735.911	51.2509	3.84	8.1e-38	4.33e-36	up	GO:0071949,FAD binding; GO:0004497,monooxygenase activity; GO:0044550,secondary metabolite biosynthetic process	--	At2g35660	gb|KVH89772.1|	MO3_ARATH, RecName: Full=Monooxygenase 3 {ECO:0000303|PubMed:10216258}; Short=AtMO3 {ECO:0000303|PubMed:10216258}; EC=1.14.13.-;	A0A118JTL2_CYNCS, SubName: Full=Aromatic-ring hydroxylase-like protein {ECO:0000313|EMBL:KVH89772.1};
TRINITY_DN105909_c3_g2	606.762	1250.58	-1.04	8.7e-38	4.65e-36	down	--	--	At4g38810	gb|PLY91932.1|	--	A0A251RQR0_HELAN, SubName: Full=Putative calcium-binding EF-hand family protein {ECO:0000313|EMBL:OTF86838.1};
TRINITY_DN99863_c1_g1	1325.97	2.12778	9.35	1.04e-37	5.53e-36	up	--	--	--	--	--	--
TRINITY_DN97413_c1_g7	140.985	736.657	-2.39	1.06e-37	5.67e-36	down	GO:0052689,carboxylic ester hydrolase activity	--	At1g34340	gb|KVH98747.1|	EMB8_PICGL, RecName: Full=Embryogenesis-associated protein EMB8; EC=3.1.1.-;	A0A103XXM6_CYNCS, SubName: Full=Uncharacterized protein {ECO:0000313|EMBL:KVH98747.1};
TRINITY_DN100025_c1_g2	5421.24	379.246	3.84	1.09e-37	5.81e-36	up	--	--	At5g25320	gb|KVH99805.1|	ACR2_ARATH, RecName: Full=ACT domain-containing protein ACR2 {ECO:0000305}; AltName: Full=Protein ACT DOMAIN REPEATS 2 {ECO:0000303|PubMed:12481063};	A0A124SED9_CYNCS, SubName: Full=Uncharacterized protein {ECO:0000313|EMBL:KVH99805.1};
TRINITY_DN100717_c1_g4	1013.12	4.9214	7.67	1.15e-37	6.1e-36	up	GO:0005615,extracellular space; GO:0042973,glucan endo-1,3-beta-D-glucosidase activity; GO:0005975,carbohydrate metabolic process; GO:0006952,defense response	K19891: GN1_2_3; glucan endo-1,3-beta-glucosidase 1/2/3 [EC:3.2.1.39]	At3g57270	gb|KVG36940.1|	E13A_SOLLC, RecName: Full=Glucan endo-1,3-beta-glucosidase A; EC=3.2.1.39; AltName: Full=(1->3)-beta-glucan endohydrolase A; Short=(1->3)-beta-glucanase A; AltName: Full=Acidic beta-1,3-glucanase; AltName: Full=Beta-1,3-endoglucanase A; Flags: Precursor;	A0A103PTH6_CYNCS, SubName: Full=Glycoside hydrolase, catalytic domain-containing protein {ECO:0000313|EMBL:KVG36940.1};
TRINITY_DN94383_c1_g3	2825.65	475.442	2.57	1.23e-37	6.56e-36	up	--	--	--	--	--	--
TRINITY_DN88133_c0_g1	233.985	26.3183	3.15	1.29e-37	6.88e-36	up	--	--	At2g44600	gb|KVH97225.1|	--	A0A124SDK3_CYNCS, SubName: Full=Uncharacterized protein {ECO:0000313|EMBL:KVH97225.1};
TRINITY_DN104807_c1_g2	229.509	539.83	-1.24	1.31e-37	6.95e-36	down	GO:0005759,mitochondrial matrix; GO:0005739,mitochondrion; GO:0005507,copper ion binding; GO:0004069,L-aspartate:2-oxoglutarate aminotransferase activity; GO:0080130,L-phenylalanine:2-oxoglutarate aminotransferase activity; GO:0030170,pyridoxal phosphate binding; GO:0006103,2-oxoglutarate metabolic process; GO:0006531,aspartate metabolic process; GO:0009058,biosynthetic process; GO:0006536,glutam…	K14455: GOT2; aspartate aminotransferase, mitochondrial [EC:2.6.1.1]	At2g30970	gb|KVH97573.1|	AAT1_ARATH, RecName: Full=Aspartate aminotransferase, mitochondrial; EC=2.6.1.1; AltName: Full=Transaminase A; Flags: Precursor;	A0A103XVD7_CYNCS, RecName: Full=Aspartate aminotransferase {ECO:0000256|RuleBase:RU000480}; EC=2.6.1.1 {ECO:0000256|RuleBase:RU000480};
TRINITY_DN100588_c3_g1	1625.88	86.4749	4.23	1.56e-37	8.27e-36	up	GO:0045430,chalcone isomerase activity; GO:0009813,flavonoid biosynthetic process	K01859: E5.5.1.6; chalcone isomerase [EC:5.5.1.6]	At3g55120	gb|ALG75881.1|	CFI_SAUME, RecName: Full=Chalcone--flavonone isomerase; Short=Chalcone isomerase; EC=5.5.1.6;	A0A1L1ZLV4_CARTI, RecName: Full=Chalcone-flavonone isomerase family protein {ECO:0000256|RuleBase:RU361158};
TRINITY_DN104413_c3_g1	1796.67	234.789	2.94	1.7e-37	9.03e-36	up	--	--	--	gb|PLY98151.1|	--	A0A251VLJ4_HELAN, SubName: Full=Uncharacterized protein {ECO:0000313|EMBL:OTG36465.1};
TRINITY_DN106399_c0_g1	1360.69	5023.71	-1.88	1.75e-37	9.24e-36	down	GO:0051213,dioxygenase activity; GO:0046872,metal ion binding; GO:0009852,auxin catabolic process	K04124: E1.14.11.15; gibberellin 3beta-dioxygenase [EC:1.14.11.15]	At1g14130	gb|AHY99671.1|	DAO_ORYSJ, RecName: Full=2-oxoglutarate-dependent dioxygenase DAO; EC=1.14.11.-; AltName: Full=Protein DIOXYGENASE FOR AUXIN OXIDATION;	A0A1B0NTU3_CARTI, SubName: Full=Flavanone 3-hydroxylase {ECO:0000313|EMBL:AHY99671.1};
TRINITY_DN98818_c1_g4	2294.72	1.88949	10.18	1.84e-37	9.72e-36	up	GO:0009543,chloroplast thylakoid lumen; GO:0004097,catechol oxidase activity; GO:0046872,metal ion binding; GO:0046148,pigment biosynthetic process	K00422: E1.10.3.1; polyphenol oxidase [EC:1.10.3.1]	--	gb|KVH96804.1|	PPO_MALDO, RecName: Full=Polyphenol oxidase, chloroplastic; Short=PPO; EC=1.10.3.1; AltName: Full=Catechol oxidase; Flags: Precursor;	A0A118JXA6_CYNCS, SubName: Full=Polyphenol oxidase {ECO:0000313|EMBL:KVH96804.1};
TRINITY_DN104901_c2_g3	50.7419	1584.85	-4.97	2.12e-37	1.12e-35	down	GO:0000139,Golgi membrane; GO:0005886,plasma membrane; GO:0006656,phosphatidylcholine biosynthetic process; GO:0015031,protein transport	--	At5g47730	gb|PLY70321.1|	SFH2_ARATH, RecName: Full=Phosphatidylinositol/phosphatidylcholine transfer protein SFH2; AltName: Full=Protein SEC FOURTEEN HOMOLOGS 2; Short=AtSFH2;	A0A103Y263_CYNCS, SubName: Full=CRAL-TRIO domain-containing protein {ECO:0000313|EMBL:KVI01137.1};
TRINITY_DN96452_c5_g5	5.47807	174.873	-5	2.16e-37	1.14e-35	down	--	--	--	--	--	--
TRINITY_DN102298_c4_g2	25.5125	184.973	-2.85	2.34e-37	1.23e-35	down	GO:0016021,integral component of membrane; GO:0005886,plasma membrane; GO:0005524,ATP binding; GO:0043621,protein self-association; GO:0004674,protein serine/threonine kinase activity; GO:0033612,receptor serine/threonine kinase binding; GO:0030154,cell differentiation; GO:0048437,floral organ development; GO:0048229,gametophyte development; GO:0010075,regulation of meristem growth	K04733: IRAK4; interleukin-1 receptor-associated kinase 4 [EC:2.7.11.1]	At5g65700	gb|PLY89859.1|	BAME1_ARATH, RecName: Full=Leucine-rich repeat receptor-like serine/threonine-protein kinase BAM1; EC=2.7.11.1; AltName: Full=Protein BARELY ANY MERISTEM 1; Flags: Precursor;	A0A2G9G8Y7_9LAMI, SubName: Full=Serine/threonine protein kinase {ECO:0000313|EMBL:PIN01736.1}; EC=2.7.11.1 {ECO:0000313|EMBL:PIN01736.1};
TRINITY_DN96751_c0_g3	653.85	222.998	1.55	2.36e-37	1.24e-35	up	GO:0004190,aspartic-type endopeptidase activity; GO:0042802,identical protein binding; GO:0045735,nutrient reservoir activity; GO:0030163,protein catabolic process; GO:0006508,proteolysis	--	At1g03220	gb|KVG72886.1|	7SB1_SOYBN, RecName: Full=Basic 7S globulin; AltName: Full=SBg7S; Short=Bg; Contains: RecName: Full=Basic 7S globulin high kDa subunit; Contains: RecName: Full=Basic 7S globulin low kDa subunit; Flags: Precursor;	A0A118HWM8_CYNCS, SubName: Full=Aspartic peptidase {ECO:0000313|EMBL:KVG72886.1}; Flags: Fragment;
TRINITY_DN87056_c0_g1	63.5428	765.184	-3.59	2.71e-37	1.42e-35	down	GO:0002253,activation of immune response; GO:0006952,defense response; GO:0009607,response to biotic stimulus	K10745: RNASEH2C; ribonuclease H2 subunit C	At1g70880	gb|KVI05459.1|	KIRO_ACTDE, RecName: Full=Kirola {ECO:0000303|PubMed:21309790}; AltName: Allergen=Act d 11 {ECO:0000303|PubMed:21309790};	A0A103YAD3_CYNCS, SubName: Full=Bet v I domain-containing protein {ECO:0000313|EMBL:KVI05459.1};
TRINITY_DN98098_c0_g1	49.4518	1992.72	-5.34	3.22e-37	1.69e-35	down	--	--	--	--	--	--
TRINITY_DN103344_c5_g1	45.1029	408.201	-3.18	3.36e-37	1.76e-35	down	GO:0005737,cytoplasm; GO:0047150,betaine-homocysteine S-methyltransferase activity; GO:0008898,S-adenosylmethionine-homocysteine S-methyltransferase activity; GO:0008270,zinc ion binding; GO:0009086,methionine biosynthetic process; GO:0032259,methylation	K00547: mmuM, BHMT2; homocysteine S-methyltransferase [EC:2.1.1.10]	At3g25900	gb|KVH97627.1|	HMT1_BRAOT, RecName: Full=Homocysteine S-methyltransferase 1; Short=BoHMT1; EC=2.1.1.10;	A0A118JXP1_CYNCS, SubName: Full=Homocysteine S-methyltransferase {ECO:0000313|EMBL:KVH97627.1};
TRINITY_DN102333_c1_g3	69.4387	274.695	-1.98	3.4e-37	1.78e-35	down	GO:0005886,plasma membrane; GO:0046872,metal ion binding; GO:0004722,protein serine/threonine phosphatase activity; GO:1900425,negative regulation of defense response to bacterium	--	At3g12620	ref|XP_021987964.1|	P2C38_ARATH, RecName: Full=Probable protein phosphatase 2C 38 {ECO:0000305}; Short=AtPP2C38 {ECO:0000303|PubMed:19021904}; EC=3.1.3.16 {ECO:0000269|PubMed:27494702};	A0A251RP03_HELAN, SubName: Full=Uncharacterized protein {ECO:0000313|EMBL:OTF85931.1};
TRINITY_DN97820_c0_g1	925.91	386.201	1.26	3.82e-37	2e-35	up	GO:0046872,metal ion binding; GO:0004722,protein serine/threonine phosphatase activity	--	At2g25620	ref|XP_022027471.1|	P2C27_ORYSJ, RecName: Full=Probable protein phosphatase 2C 27; Short=OsPP2C27; EC=3.1.3.16;	A0A251V465_HELAN, SubName: Full=Putative PPM-type phosphatase domain, Protein phosphatase 2C family {ECO:0000313|EMBL:OTG30390.1};
TRINITY_DN105543_c3_g2	57.9576	295.932	-2.35	3.97e-37	2.08e-35	down	GO:0043231,intracellular membrane-bounded organelle; GO:0047213,anthocyanidin 3-O-glucosyltransferase activity; GO:0102360,daphnetin 3-O-glucosyltransferase activity; GO:0047893,flavonol 3-O-glucosyltransferase activity; GO:0102425,myricetin 3-O-glucosyltransferase activity; GO:0080043,quercetin 3-O-glucosyltransferase activity; GO:0080044,quercetin 7-O-glucosyltransferase activity; GO:0035251,UD…	K10757: E2.4.1.91; flavonol 3-O-glucosyltransferase [EC:2.4.1.91]	At5g17050	gb|KVI11784.1|	U78D2_ARATH, RecName: Full=UDP-glycosyltransferase 78D2; EC=2.4.1.-; AltName: Full=Anthocyanin 3-O-glucosyltransferase; AltName: Full=Flavonol 3-O-glucosyltransferase; EC=2.4.1.91; AltName: Full=UDP glucose:flavonoid 3-O-glucosyltransferase;	A0A103YMG3_CYNCS, RecName: Full=Glycosyltransferase {ECO:0000256|RuleBase:RU362057}; EC=2.4.1.- {ECO:0000256|RuleBase:RU362057};
[truncated: 3,877 more rows]
