# Supplementary material for: Integrated metabolomics and transcriptome analysis on flavonoid biosynthesis in flowers of safflower (Carthamus tinctorius L.) during colour-transition
Source: PeerJ. 2022 Jun 22;10:e13591. doi: 10.7717/peerj.13591 (PMC9233481; doi:10.7717/peerj.13591)
Supplement: Supplemental Information 9 [file peerj-10-13591-s009.xlsx]

## Sheet: Sheet1
>TRINITY_DN101065_c9_g4 MTDSMLQELVPELHPLRYKDLPFNTTPTEVATEMVALSERIRTPSAIIWNTMDYLEHSALAQLRKHYRVPIFAIGPLSKMVRCPSTSFLKEDTDCISWLDKQAPRSVIYVSLGSLATMDETELAETAWGLANSKQPFLWVVRPGSVCGSEWVEFFPEGFTEEIRGRGLVLKWAPQKEVLAHFAVGGFWSHCGWNSTLESISEGVPMICRPVMGDQCVNSRYLSYVWRIGLELERLDRKVVESAIRRLLVDDEGKEMRQRAIEMKEKAKYCLCNGGSSFKSLNDLVEFLLILTGF*
>TRINITY_DN101065_c9_g1 MGEERKRGKPLVLVASPFQGHMTPMLQLGSVLHSKGFSITMVHTKLNSPDHSNHPEFEFLVLSDNFLAIDASANFTTFLEALNDNSKKQLQDHLAREMIEEGRDAGGRITIIHDNIMYFAEEVANNLGLPSIVLRSSSASYMPAFLALPKLHAKGQLPVKDSMLQELVPELHPLRYKDLPFNTTPTEVATEMVALSERIRTPSAIIWNTMDYLEHSALAQLRKHYRVPIFAIGPLSKMVRCPSTSFLKEDTDCISWLDKQAPRSVIYVSLGSLATMDETELAETAWGLANSKQPFLWVVRPGSVCGSEWVEFFPEGFTEEIRGRGLVLKWAPQKEVLAHFAVGGFWSHCGWNSTLESISEGVPMICRPVMGDQCV…
>TRINITY_DN73287_c0_g1 ETKGIVVNTFKELEPYAIDSLSSSKYPGLPPVYPVGPVIDRVGPAKWHSNRSGQEKIIDWLDRQPSGSVVFLCFGSMGSLSRAQVREIATGLERAGFRFLWALREPGKEKLELPKDYEEVGGSLFPDGFIDRTAGMGLVCGWAPQVSVLAHGAIGGFVSHCGWNSILESISYGVPIATWPLYAEQQLNAFEMVKEVGLSVELRLDSREGGGDLVLAEEVERGVRRLMDGGDDGELRKRVKEMSEKSKKALMENGSSFEAMDDLINNILLSSV*
>TRINITY_DN81100_c0_g1 MPQVAIIAAPTMGNLIPAVEFATHLINHHHRRISVAILLISMPQWPLNHHYIQSHTSTNHIRFIHIHPLHPPNQCNSIVDLISLHIENHKHIIKQTLKTLPPLAGIFVDMFCTSVIDVAADLHIPCYLFFASPATYLGFVLHLATLPAAESLDSAAELTVPSFANSVPVNVLPSYCIKRNELGYSTFVRHALRYKETKGIVVNTFKELEPYAIDSLSSSKYPGLPPVYPVGPVIDRVGPAKWHSNRSGQEKIIDWLDRQPSGSVVFLCFGSMGSLSRAQVREIATGLERAGFRFLWALREPGKEKLELPKDYEEVGGSLFPDGFIDRTAGMGLVCGWAPQVSVLAHGAIGGFVSHCGWNSILESISYGVPIATWPL…
>TRINITY_DN106020_c4_g1 MESFRKGMLANTTSWGVVYNTFQELEGVYMDYMKKQMGHDRVWAVGPLLPEDHGPLAPTGRGGSSAVPADDLLVWLDEKPDDSVAYICFGSRVVLSEKQMGALMGALELSEVHFILCEKTSDSSSIPSGFEARVAGRGFIVRGWAPQLAILRHRAVGSFVTHCGWNSTLEGVEAGVRMLTWPMGADQYANAKLLVDELGIAKRVCEGGPESVPDSIELARLLDESLSGDRVKVKELSQDAIKAVKEGTSLRDLDMFTKLLSEL*
>TRINITY_DN151270_c0_g1 AKVGHRRVFGVGPVSLLGGSDFMTRGGTGSGSGSDVVGWLDGRPDGSVLYVCFGSQVFLSGDQIEALGIGLERSGVHFIWVMRPESVVPDGIGSGRGMVIKGWAPQVAILSHRAVGGFLSHCGWNSVLEAIVAGVMILAWPMEADQYINARLLVDDHGAAVRVCEGRASVPDSAELARTIAESMSVDKSEKLKAKELKGKAIEAIKEGGSSSRELDRLVKELSNFKPKMSGVVKD*
>TRINITY_DN97818_c0_g6 HWFNSHPNPPVAIIADFFLGWTHHLAAKLGIPKIAFFSSGAFLTAVLDHICHHMPLVQTQEVTIFQDLPNSPTFPRDHLPSLATLYKESAPEWDLVLDGHVMNASSWGLVVNTFDALEAPYMEHLAAKVGHRRVFGVGPVSLLGGSDFMTRGGTGSGSGSDVVGWLDGRPDGSVLYVCFGSQVFLSGDQIEALGIGLERSGVHFIWVMRPESVVPDGIGSGRGMVIKGWAPQVAILSHRAVGGFLSHCGWNSVLEAIVAGVMILAWPMEADQYINARLLVDDHGAAVRVCEGRASVPDSAELARTIAESMSVDKSEKLKAKELKGKAIEAIKEGGSSSRELDRLVKELSNFKPKMSGVVKD*
>TRINITY_DN104064_c1_g2 MDHHHHFLLVSLSFQSHINPTLRLAAKLTRAGARVTFATTVSGLNNLKTRPSLPGLSYDSFSDGNDTAPDPTVRKPDYFQQIELNGSANLKSLILTKTKQGQSVDFVIYGMCLPWVAKVARDLHVPSAFFFIQSAATFSVVYHFFRTDGHGVVNSEIDPTGELEIPGLPLLKNSEIPLFLRPTEAAFPVFRDHIETLEKHPNPCMLINTFDGLESESIESIPDRINVFSVGPLFSGETEEPFICDIFHDSDRETYLRWLDSKAPKSVVYVSFGSILELGEKQKEEILEGLIESGRPFLWAIRSHGEDNEARTNLCRAQIHHCDDVAKGFKATEGDGGGLMVRWCSQVEVLNHSAIGCFVSHCGWNSILESMVGGV…
>TRINITY_DN104101_c1_g9 ILVNSFSELEFESLRAIEKLEFLPIGPLVPSEFLDGEESLNNSCGEDFLKKAEDGYIEWLNTKPKSSVVYVSFGTLATLSMDQMEEIAVGLLESGWPFLWVIRDIGILEGLSKTEELKKQGMIVDWCNQVEVLCHEAIGCFVT
>TRINITY_DN74252_c0_g1 MEFNLPLPTTIALIIFSITLLASLLQIFNTKKSNNRNYPPQPKGAWPIIGHLHLLRRSHLPHKVLGAMADTYGPIFTIRLGVRQALVVSDADMARVCFTTNDLDFANRPTTVVSELLGYNSAKFSFAPYGDYWRKIRKIVTLELLSQRRVEMLGGIRVSEVRSATNEIYKACVMNKDSSDLVKVEMKQWFGKLILNVVLRSVSGKRFSANDDEGVRFQAVARRYFKLLGAFLVSDFIPFLKDLDVGGYEKAMKETAREMDEFFEGWLREKLVRGGRRKDGQVFMDVLISVLEDASEEDFHGFDHHTIIKASSLVLLTAGSETTTVTLIWALSLLLNNPKSLKVAQDELDEHVGRDRLVQESDLNNLSYLQAIIKET…
