# Supplementary material for: Integrated metabolomics and transcriptome analysis on flavonoid biosynthesis in flowers of safflower (Carthamus tinctorius L.) during colour-transition
Source: PeerJ. 2022 Jun 22;10:e13591. doi: 10.7717/peerj.13591 (PMC9233481; doi:10.7717/peerj.13591)
Supplement: Supplemental Information 10 [file peerj-10-13591-s010.xlsx]

## Sheet: Sheet1
geneID	metaID	PCC	PCCP	ninequadrants	components	family
TRINITY_DN101065_c9_g1	pma0724	0.954	0.00307563	3	Naringenin C-hexoside	Flavone C-glycosides
TRINITY_DN101065_c9_g1	pma1590	0.953	0.0033196	3	Peonidin O-hexoside	Anthocyanins
TRINITY_DN101065_c9_g1	pmb0541	0.979	0.000649732	3	Cyanidin 3-O-glucosyl-malonylglucoside	Anthocyanins
TRINITY_DN101065_c9_g1	pmb0622	0.934	0.00644243	3	C-hexosyl-luteolin O-hexoside	Flavone C-glycosides
TRINITY_DN101065_c9_g1	pmb0711	0.94	0.00524515	3	Quercetin 7-O-rutinoside	Flavonol
TRINITY_DN101065_c9_g1	pmb0712	0.952	0.00342188	3	Tricin 5-O-hexosyl-O-hexoside	Flavone
TRINITY_DN101065_c9_g1	pmb2987	0.924	0.00837511	3	Acacetin O-acetyl hexoside	Flavone
TRINITY_DN101065_c9_g1	pmb2999	0.955	0.00303548	3	Chrysoeriol 5-O-hexoside	Flavone
TRINITY_DN101065_c9_g1	pmb3000	0.95	0.00370519	3	Chrysoeriol O-acetylhexoside	Flavone
TRINITY_DN101065_c9_g1	pme0200	0.957	0.00276202	3	Kaempferol	Flavonol
TRINITY_DN101065_c9_g1	pme0324	0.929	0.00734722	3	Chrysin	Flavone
TRINITY_DN101065_c9_g1	pme0377	0.946	0.00422234	3	Naringenin	Flavanone
TRINITY_DN101065_c9_g1	pme0379	0.936	0.00596988	3	Apigenin	Flavone
TRINITY_DN101065_c9_g1	pme1510	0.959	0.00252182	3	"Baicalein (5,6,7-Trihydroxyflavone)"	Flavone
TRINITY_DN101065_c9_g1	pme1578	0.954	0.00314026	3	"Genistein (4',5,7-Trihydroxyisoflavone)"	Isoflavone
TRINITY_DN101065_c9_g1	pme1580	0.95	0.00375373	3	Eriodictyol	Flavanone
TRINITY_DN101065_c9_g1	pme1824	0.94	0.00534422	3	Protocatechuic acid	Catechin derivatives
TRINITY_DN101065_c9_g1	pme2319	0.94	0.00534021	3	Hesperetin	Flavanone
TRINITY_DN101065_c9_g1	pme2482	0.928	0.00768257	3	Protocatechuic aldehyde	Catechin derivatives
TRINITY_DN101065_c9_g1	pme2960	0.953	0.00324475	3	Naringenin chalcone	Flavanone
TRINITY_DN101065_c9_g1	pme3399	0.948	0.00397167	3	Sissotrin	Isoflavone
TRINITY_DN101065_c9_g1	pme3461	0.936	0.00610386	3	Homoeriodictyol	Flavanone
TRINITY_DN101065_c9_g1	pme3475	0.941	0.00519252	3	Butin	Flavone
TRINITY_DN101065_c9_g1	pme3502	0.94	0.00532702	3	Formononetin 7-O-glucoside (Ononin)	Isoflavone
TRINITY_DN101065_c9_g1	pme3505	0.951	0.00349547	3	Xanthohumol	Flavanone
