# Supplementary material for: Integrated metabolomics and transcriptome analysis on flavonoid biosynthesis in flowers of safflower (Carthamus tinctorius L.) during colour-transition
Source: PeerJ. 2022 Jun 22;10:e13591. doi: 10.7717/peerj.13591 (PMC9233481; doi:10.7717/peerj.13591)
Supplement: Supplemental Information 16 [file peerj-10-13591-s016.xlsx]

## Sheet: Sheet1
	S1			S2			S3			S4			S5			R			S			L
	S1-R1	S1-R2	S1-R3	S2-R1	S2-R2	S2-R3	S3-R1	S3-R2	S3-R3	S4-R1	S4-R2	S4-R3	S5-R1	S5-R2	S5-R3	R-R1	R-R2	R-R3	S-R1	S-R2	S-R3	L-R1	L-R2	L-R3
CtUGT9	0.28	0.1	0.12	1.07	0.72	0.71	53.03	58.64	68.72	12.94	19.61	27.83	6.82	6.47	4.23	3	2.2	2	0.28	0.1	0.12	0.93	0.4	0.3
Note:S1-S5 mean five development stages of flower; R-root,S-stem, L-leaf; R1-R3 means three repetition;
	CK			MeJA-T
	CK-R1	CK-R2	CK-R3	MeJA-T-R1	MeJA-T-R2	MeJA-T-R3
CtUGT9	9.05	18.21	9.55	100.87	66.33	79.63
Note:R1-R3 means three repetition;
